# Supplementary material for: Relationship between relative deprivation and health of Hainan Island residents: mediating effect of negative health behaviors
Source: PeerJ. 2020 Mar 24;8:e8728. doi: 10.7717/peerj.8728 (PMC7100593; doi:10.7717/peerj.8728)
Supplement: Supplemental Information 2 [file peerj-08-8728-s002.xlsx]

## Sheet: male
id	gender	age	marital_status	educational_level	chronic_diseases	area_of_residence	average_monthly_income	self_perceived_health_status	smoking	alcohol_drinking	betel_nuts_chewing	VAR00001	VAR00002	VAR00003	VAR00004	VAR00005	VAR00006	VAR00007	VAR00008	VAR00009	VAR00010	VAR00011	VAR00012	VAR00013	VAR00014	VAR00015	VAR00016	VAR00017	VAR00018	VAR00019	VAR00020	VAR00021	VAR00022	VAR00023	VAR00024	VAR00025	VAR00026	VAR00027	VAR00028	VAR00029	VAR00030	VAR00031	VAR00032	VAR00033
1	1	1	1	1	0	4	0	5	3	3	3	1	1	1	1	0	4	0	5	3	3	3	1	3	5	2	97	97	1	1	1	4	4	4	4	2	5	5	3	5	1	3	2	1
2	1	1	1	1	0	4	0	5	3	3	3	1	1	1	1	0	4	0	5	3	3	3	1	4	5	1	0	1	3	1	2	2	2	1	1	1	1	6	5	8	9	1	1	2
3	1	1	1	1	0	4	0	5	3	3	3	1	1	1	1	0	4	0	5	3	3	3	4	3	3	2	1	1	2	1	1	1	4	2	4	2	4	5	5	6	3	-8	2	2
4	1	1	1	1	0	4	0	5	3	3	3	1	1	1	1	0	4	0	5	3	3	3	4	4	4	2	1	1	1	1	1	4	4	4	-8	2	4	5	5	5	5	1	2	1
5	1	1	1	1	0	4	0	5	3	3	3	1	1	1	1	0	4	0	5	3	3	3	4	4	4	1	0	1	1	1	1	2	4	4	4	4	5	1	1	1	1	1	3	2
6	1	1	1	1	0	4	0	5	3	3	3	1	1	1	1	0	4	0	5	3	3	3	2	3	4	6	3	3	1	1	1	4	4	4	2	2	1	3	2	4	2	2	2	1
7	1	1	1	1	0	4	0	5	3	3	3	1	1	1	1	0	4	0	5	3	3	3	2	5	5	2	1	1	1	1	1	4	1	1	2	1	5	5	3	8	1	2	1	2
8	1	1	1	1	0	4	0	5	3	3	3	1	1	1	1	0	4	0	5	3	3	3	3	4	4	4	3	1	1	1	1	2	5	5	5	3	1	10	10	10	3	2	3	1
18	1	1	1	1	0	4	0	5	3	3	3	1	1	1	1	0	4	0	5	3	3	3	2	4	4	2	1	1	3	1	3	4	3	2	3	1	5	3	3	5	3	3	3	2
19	1	1	1	1	0	4	0	5	3	3	3	1	1	1	1	0	4	0	5	3	3	3	3	4	4	2	1	1	1	1	1	1	4	4	4	1	5	1	1	1	1	2	2	3
20	1	1	1	1	0	4	0	5	3	3	3	1	1	1	1	0	4	0	5	3	3	3	2	4	5	2	1	1	5	3	3	4	3	2	4	1	3	6	4	8	7	2	3	2
21	1	1	1	1	0	4	0	5	3	3	3	1	1	1	1	0	4	0	5	3	3	3	2	2	3	1	0	1	4	1	1	4	2	2	2	2	4	5	1	6	5	1	3	4
22	1	1	1	1	0	4	0	5	3	3	3	1	1	1	1	0	4	0	5	3	3	3	4	4	4	1	1	0	3	3	1	4	2	1	1	2	2	3	3	4	4	2	1	1
23	1	1	1	1	0	4	0	5	3	3	3	1	1	1	1	0	4	0	5	3	3	3	4	4	5	1	0	1	1	1	3	4	3	2	3	1	5	5	5	5	5	1	3	4
24	1	1	1	1	0	4	0	5	3	3	3	1	1	1	1	0	4	0	5	3	3	3	4	5	4	2	1	1	1	1	1	2	2	4	1	1	4	3	1	5	3	3	3	3
25	1	1	1	1	0	4	0	5	3	3	3	1	1	1	1	0	4	0	5	3	3	3	2	4	5	2	1	1	3	1	1	-8	2	2	4	2	4	6	4	8	5	2	3	4
26	1	1	1	1	0	4	0	5	3	3	3	1	1	1	1	0	4	0	5	3	3	3	4	3	4	2	1	1	3	1	3	3	4	4	2	2	4	5	1	5	5	2	3	3
27	1	1	1	1	0	4	0	5	3	3	3	1	1	1	1	0	4	0	5	3	3	3	4	4	5	1	97	97	1	1	1	2	4	1	2	2	5	5	3	6	2	1	1	1
28	1	1	1	1	0	4	0	5	3	3	3	1	1	1	1	0	4	0	5	3	3	3	3	4	4	1	97	97	1	1	1	2	4	4	4	4	4	6	6	6	6	1	1	3
42	1	4	1	2	1	3	1	3	0	0	0	1	4	1	2	1	3	1	3	0	0	0	3	4	2	1	1	0	2	2	1	1	2	1	2	2	4	1	1	1	1	3	2	2
43	1	4	1	2	1	3	1	3	0	0	0	1	4	1	2	1	3	1	3	0	0	0	5	2	1	96	96	96	2	1	1	4	3	3	3	3	5	1	1	1	1	1	3	5
44	1	4	1	2	1	3	1	3	0	0	0	1	4	1	2	1	3	1	3	0	0	0	2	4	4	1	0	1	1	1	1	2	4	4	4	2	1	1	1	1	1	1	3	2
45	1	4	1	2	1	3	1	3	0	0	0	1	4	1	2	1	3	1	3	0	0	0	3	1	4	1	97	97	1	1	1	2	1	3	5	1	5	1	1	1	1	2	1	1
46	1	4	1	2	1	3	1	3	0	0	0	1	4	1	2	1	3	1	3	0	0	0	2	2	4	2	1	1	3	1	3	4	2	1	2	1	4	6	4	7	4	2	3	4
52	1	4	1	2	1	3	1	3	0	0	0	1	4	1	2	1	3	1	3	0	0	0	4	4	5	2	1	1	4	1	2	4	5	5	5	1	5	5	3	8	4	-8	3	5
53	1	4	1	2	1	3	1	3	0	0	0	1	4	1	2	1	3	1	3	0	0	0	4	4	4	1	1	0	2	2	2	4	2	4	4	2	2	3	1	3	1	3	3	2
54	1	4	1	2	1	3	1	3	0	0	0	1	4	1	2	1	3	1	3	0	0	0	2	4	5	3	2	1	1	1	1	4	1	1	1	1	5	5	4	6	5	1	2	2
55	1	4	1	2	1	3	1	3	0	0	0	1	4	1	2	1	3	1	3	0	0	0	4	4	4	2	97	97	1	1	1	3	2	2	2	1	2	5	2	5	1	1	1	1
56	1	4	1	2	1	3	1	3	0	0	0	1	4	1	2	1	3	1	3	0	0	0	4	3	3	2	1	1	1	1	1	4	4	4	1	2	3	4	4	4	2	2	2	2
62	1	4	1	2	1	3	1	3	0	0	0	1	4	1	2	1	3	1	3	0	0	0	5	1	3	1	97	97	1	1	1	1	1	1	3	1	5	4	4	4	2	2	2	3
63	1	4	1	2	1	3	1	3	0	0	0	1	4	1	2	1	3	1	3	0	0	0	2	4	4	2	1	1	1	1	1	1	4	4	4	1	5	5	3	7	1	1	2	2
64	1	4	1	2	1	3	1	3	0	0	0	1	4	1	2	1	3	1	3	0	0	0	2	4	5	-2	-2	-2	3	1	1	2	4	3	3	3	3	5	2	5	2	1	3	5
65	1	4	1	2	1	3	1	3	0	0	0	1	4	1	2	1	3	1	3	0	0	0	3	4	4	1	1	0	3	1	3	2	2	2	1	1	4	4	3	8	6	1	3	3
66	1	4	1	2	1	3	1	3	0	0	0	1	4	1	2	1	3	1	3	0	0	0	2	3	4	1	0	1	4	1	4	2	1	1	1	1	5	4	1	7	1	1	3	2
72	1	4	1	2	1	3	2	3	0	0	0	1	4	1	2	1	3	2	3	0	0	0	3	3	4	0	0	0	3	1	3	2	3	3	4	1	5	4	1	5	1	2	3	5
73	1	4	1	2	1	3	1	3	0	0	0	1	4	1	2	1	3	1	3	0	0	0	4	2	3	2	1	1	5	1	1	2	4	2	4	2	5	3	6	6	3	2	3	4
74	1	4	1	2	1	3	1	3	0	0	0	1	4	1	2	1	3	1	3	0	0	0	2	4	4	2	1	1	4	1	1	3	3	1	1	1	5	5	5	5	4	1	3	1
75	1	4	1	2	1	3	1	3	0	0	0	1	4	1	2	1	3	1	3	0	0	0	4	3	4	2	1	1	1	1	5	2	1	1	1	1	5	3	1	8	1	2	3	2
76	1	4	1	2	1	3	1	3	0	0	0	1	4	1	2	1	3	1	3	0	0	0	3	3	4	1	97	97	3	1	3	4	3	3	3	1	3	5	5	6	5	1	1	3
83	1	4	1	2	1	3	2	3	0	0	0	1	4	1	2	1	3	2	3	0	0	0	4	4	4	2	1	1	2	1	1	4	4	4	3	3	4	6	5	6	4	1	2	2
84	1	4	1	2	1	3	2	3	0	0	0	1	4	1	2	1	3	2	3	0	0	0	2	4	4	2	1	1	3	1	1	4	2	2	2	1	5	3	3	5	3	3	3	4
85	1	4	1	2	1	3	2	3	0	0	0	1	4	1	2	1	3	2	3	0	0	0	2	2	4	1	1	0	1	1	1	3	5	4	4	4	4	6	6	6	5	2	2	4
86	1	4	1	2	1	3	2	3	0	0	0	1	4	1	2	1	3	2	3	0	0	0	4	4	4	0	0	0	1	1	1	2	4	2	2	1	4	2	1	7	5	2	3	2
87	1	4	1	2	1	3	2	3	0	0	0	1	4	1	2	1	3	2	3	0	0	0	2	4	4	2	1	1	1	1	1	4	3	4	4	2	4	4	4	5	6	1	3	4
88	1	4	1	2	1	3	2	3	0	0	0	1	4	1	2	1	3	2	3	0	0	0	4	4	4	2	97	97	1	1	1	1	2	2	4	2	4	5	6	5	2	2	3	1
93	1	4	1	2	1	3	2	3	0	0	0	1	4	1	2	1	3	2	3	0	0	0	5	4	4	2	1	1	2	1	1	4	2	1	4	1	5	5	4	6	2	1	1	4
94	1	4	1	2	1	3	2	3	0	0	0	1	4	1	2	1	3	2	3	0	0	0	4	4	5	2	1	1	3	1	3	2	3	3	3	3	3	4	4	4	4	2	3	5
95	1	4	1	2	1	3	2	3	0	0	0	1	4	1	2	1	3	2	3	0	0	0	4	3	4	2	1	1	3	1	1	1	2	3	4	3	5	5	4	8	6	2	3	5
100	1	1	1	1	0	4	0	5	3	3	3	1	1	1	1	0	4	0	5	3	3	3	3	3	4	2	1	1	4	1	3	4	1	1	1	1	5	7	7	8	6	2	3	1
101	1	1	1	1	0	4	0	5	3	3	3	1	1	1	1	0	4	0	5	3	3	3	4	4	4	2	1	1	1	1	1	4	5	4	4	1	5	3	2	6	2	1	3	4
102	1	1	1	1	0	4	0	5	3	3	3	1	1	1	1	0	4	0	5	3	3	3	2	3	5	3	2	1	2	1	3	4	2	2	1	1	4	6	4	8	8	2	3	3
103	1	1	1	1	0	4	0	5	3	3	3	1	1	1	1	0	4	0	5	3	3	3	4	4	5	2	1	1	5	2	1	2	1	4	4	1	4	5	5	5	5	2	3	5
104	1	1	1	1	0	4	0	5	3	3	3	1	1	1	1	0	4	0	5	3	3	3	2	4	4	0	0	0	4	4	4	4	1	2	1	1	5	5	5	5	7	1	1	4
105	1	1	1	1	0	4	0	5	3	3	3	1	1	1	1	0	4	0	5	3	3	3	2	-8	4	4	0	4	3	1	1	2	4	4	3	2	4	4	1	4	1	1	3	4
106	1	1	1	1	0	4	0	5	3	3	3	1	1	1	1	0	4	0	5	3	3	3	2	2	5	2	1	1	2	1	1	4	1	2	2	1	2	7	4	7	4	2	3	5
107	1	1	1	1	0	4	0	5	3	3	3	1	1	1	1	0	4	0	5	3	3	3	4	2	4	2	1	1	1	1	1	4	3	2	2	3	4	4	3	5	2	1	2	2
108	1	1	1	1	0	4	0	5	3	3	3	1	1	1	1	0	4	0	5	3	3	3	3	2	4	1	1	0	1	1	1	3	4	3	4	3	3	5	5	5	5	1	3	3
109	1	1	1	1	0	4	0	5	3	3	3	1	1	1	1	0	4	0	5	3	3	3	4	2	4	2	1	1	1	1	3	4	3	1	2	1	3	8	8	8	1	1	2	5
110	1	1	1	1	0	4	0	5	3	3	3	1	1	1	1	0	4	0	5	3	3	3	4	3	3	2	1	1	2	1	1	4	5	4	2	1	5	1	1	5	3	2	3	3
111	1	1	1	1	0	4	0	5	3	3	3	1	1	1	1	0	4	0	5	3	3	3	1	4	5	3	3	0	1	1	3	4	2	2	1	1	3	7	8	7	5	1	2	4
112	1	1	1	1	0	4	0	5	3	3	3	1	1	1	1	0	4	0	5	3	3	3	4	2	3	1	97	97	-8	1	1	1	2	4	4	1	5	1	1	1	1	2	2	2
113	1	1	1	1	0	4	0	5	3	3	3	1	1	1	1	0	4	0	5	3	3	3	2	2	4	2	1	1	4	1	1	4	2	1	2	1	1	5	5	6	1	1	2	4
114	1	1	1	1	0	4	0	5	3	3	3	1	1	1	1	0	4	0	5	3	3	3	3	2	4	3	1	2	2	1	1	4	4	4	4	2	2	6	6	8	6	2	3	3
115	1	1	1	1	0	4	0	5	3	3	3	1	1	1	1	0	4	0	5	3	3	3	4	4	4	1	0	1	3	3	1	1	4	3	3	2	2	1	7	5	6	2	3	2
116	1	1	1	2	0	4	0	5	3	3	3	1	1	1	2	0	4	0	5	3	3	3	1	2	3	2	1	1	2	1	1	2	4	4	-8	2	4	3	1	3	1	2	3	4
117	1	1	1	2	0	4	0	5	3	3	3	1	1	1	2	0	4	0	5	3	3	3	2	3	4	2	1	1	3	1	1	2	2	2	5	2	5	4	2	7	2	2	2	1
118	1	1	1	2	0	4	0	5	3	3	3	1	1	1	2	0	4	0	5	3	3	3	1	5	5	3	1	2	1	1	1	2	5	5	2	-8	5	6	5	8	4	2	3	2
119	1	1	1	2	0	4	0	5	3	3	3	1	1	1	2	0	4	0	5	3	3	3	1	4	4	2	0	2	4	1	1	4	2	2	2	1	4	6	4	8	5	1	3	2
120	1	1	1	2	0	4	0	5	3	3	3	1	1	1	2	0	4	0	5	3	3	3	4	4	3	3	97	97	3	1	4	2	4	1	4	1	2	4	1	-8	3	2	3	2
121	1	1	1	2	0	4	0	5	3	3	3	1	1	1	2	0	4	0	5	3	3	3	3	2	4	3	2	1	5	3	2	4	5	4	4	4	4	6	5	7	5	3	2	5
122	1	1	1	2	0	4	0	5	3	3	3	1	1	1	2	0	4	0	5	3	3	3	4	2	3	2	1	1	3	1	1	4	3	4	4	1	5	3	2	5	3	2	1	4
123	1	1	1	2	0	4	0	5	3	3	3	1	1	1	2	0	4	0	5	3	3	3	2	3	5	4	2	2	5	1	1	4	3	4	5	3	4	4	1	5	5	2	3	3
124	1	1	1	2	0	4	0	5	3	3	3	1	1	1	2	0	4	0	5	3	3	3	4	4	5	2	1	1	1	1	1	4	5	3	4	5	5	5	5	6	1	1	3	1
125	1	1	1	2	0	4	0	5	3	3	3	1	1	1	2	0	4	0	5	3	3	3	4	4	5	1	1	0	3	1	1	2	4	4	4	2	5	5	3	6	2	1	3	4
126	1	1	1	2	0	4	0	5	3	3	3	1	1	1	2	0	4	0	5	3	3	3	4	4	5	2	1	1	2	3	1	1	3	4	2	2	3	7	5	7	2	3	1	4
127	1	1	1	2	0	4	0	5	3	3	3	1	1	1	2	0	4	0	5	3	3	3	4	4	4	2	1	1	4	3	2	2	3	2	2	4	3	4	1	7	3	2	3	3
128	1	1	1	2	0	4	0	5	3	3	3	1	1	1	2	0	4	0	5	3	3	3	3	2	5	3	97	97	1	1	1	1	4	2	4	2	4	3	3	7	3	1	2	2
129	1	1	1	2	0	4	0	5	3	3	3	1	1	1	2	0	4	0	5	3	3	3	2	3	3	2	1	1	2	1	1	4	5	5	5	5	5	1	1	1	1	2	3	5
130	1	1	1	2	0	4	0	5	3	3	3	1	1	1	2	0	4	0	5	3	3	3	3	3	5	4	97	97	4	1	1	2	5	2	2	1	2	5	1	6	5	1	3	1
131	1	1	1	2	0	4	0	5	3	3	3	1	1	1	2	0	4	0	5	3	3	3	2	2	3	2	97	97	3	1	1	2	4	4	5	2	5	6	-8	9	4	2	3	2
132	1	1	0	2	0	4	0	5	3	3	3	1	1	0	2	0	4	0	5	3	3	3	2	4	3	1	0	1	2	1	1	4	5	5	5	2	5	4	5	1	8	2	3	5
133	1	1	0	2	0	4	0	5	3	3	3	1	1	0	2	0	4	0	5	3	3	3	3	3	5	2	97	97	3	1	3	4	5	2	2	1	2	5	3	7	7	1	1	4
134	1	1	0	2	0	4	0	5	3	3	3	1	1	0	2	0	4	0	5	3	3	3	4	4	5	2	0	2	1	1	1	4	2	-8	4	1	-8	7	7	7	2	1	2	1
135	1	1	0	2	0	4	0	5	3	3	3	1	1	0	2	0	4	0	5	3	3	3	2	2	4	2	1	1	1	1	1	4	4	4	4	1	5	5	5	5	3	2	2	1
136	1	1	0	2	0	4	0	5	3	3	3	1	1	0	2	0	4	0	5	3	3	3	4	3	4	3	2	1	1	1	3	2	1	1	3	1	5	3	3	3	2	2	1	2
137	1	1	0	2	0	4	0	5	3	3	3	1	1	0	2	0	4	0	5	3	3	3	2	3	4	2	1	1	3	1	2	2	4	4	-8	2	4	4	3	5	3	1	3	2
138	1	1	0	2	0	4	0	5	3	3	3	1	1	0	2	0	4	0	5	3	3	3	4	2	4	2	97	97	3	1	3	4	2	1	2	1	5	5	2	7	3	2	1	4
139	1	1	0	2	0	4	0	5	3	3	3	1	1	0	2	0	4	0	5	3	3	3	3	4	4	2	97	97	2	2	4	4	4	2	4	1	5	5	3	7	1	1	1	4
140	1	1	0	2	0	4	0	5	3	3	3	1	1	0	2	0	4	0	5	3	3	3	5	2	3	3	2	1	4	3	3	2	5	3	3	2	3	1	1	1	1	1	2	5
141	1	1	0	2	0	4	0	5	3	3	3	1	1	0	2	0	4	0	5	3	3	3	4	3	4	1	1	0	1	1	1	4	4	4	4	4	5	6	6	-8	5	1	3	2
142	1	1	0	2	0	4	0	5	3	3	3	1	1	0	2	0	4	0	5	3	3	3	4	3	4	2	1	1	3	1	1	2	5	2	4	1	5	5	5	5	5	2	1	1
143	1	1	0	2	0	4	0	5	3	3	3	1	1	0	2	0	4	0	5	3	3	3	3	4	4	2	1	1	2	1	1	4	4	4	3	2	2	4	4	5	4	2	3	2
144	1	1	0	2	0	4	0	5	3	3	3	1	1	0	2	0	4	0	5	3	3	3	4	3	3	1	97	97	1	1	3	4	1	1	3	2	5	1	1	1	2	2	3	3
145	1	1	0	2	0	4	0	5	3	3	3	1	1	0	2	0	4	0	5	3	3	3	2	1	5	4	3	1	1	1	1	2	5	2	2	2	5	5	3	1	1	2	2	1
146	1	1	0	2	0	4	0	5	3	3	3	1	1	0	2	0	4	0	5	3	3	3	2	2	5	1	97	97	2	1	1	2	1	2	1	1	5	6	5	7	6	1	1	2
147	1	1	0	2	0	4	0	5	3	3	3	1	1	0	2	0	4	0	5	3	3	3	3	3	3	2	1	1	3	4	3	4	2	2	3	2	5	5	5	9	5	2	3	3
148	1	1	0	2	0	4	0	5	3	3	3	1	1	0	2	0	4	0	5	3	3	3	5	2	4	2	1	1	2	1	1	2	5	3	1	3	5	6	6	8	2	3	3	4
149	1	1	0	2	0	4	0	5	3	3	3	1	1	0	2	0	4	0	5	3	3	3	3	2	4	1	1	0	5	1	1	2	1	1	4	1	3	3	2	8	4	-8	3	3
150	1	1	0	2	0	4	0	5	3	3	3	1	1	0	2	0	4	0	5	3	3	3	2	4	4	2	1	1	1	1	1	4	4	2	3	2	4	8	7	8	7	2	3	4
151	1	1	0	2	0	4	0	5	3	3	3	1	1	0	2	0	4	0	5	3	3	3	4	1	5	3	2	1	3	1	1	2	4	4	3	2	3	7	3	8	2	2	3	3
152	1	1	0	2	0	4	0	5	3	3	3	1	1	0	2	0	4	0	5	3	3	3	2	4	4	3	2	1	5	3	3	3	2	1	1	3	4	8	7	8	6	3	3	5
153	1	1	0	2	0	4	0	5	3	3	3	1	1	0	2	0	4	0	5	3	3	3	3	2	5	6	3	3	1	1	3	4	1	1	1	1	3	10	10	10	5	2	3	4
154	1	1	0	2	0	4	0	5	3	3	3	1	1	0	2	0	4	0	5	3	3	3	4	4	4	2	97	97	4	1	1	1	4	2	4	1	5	4	1	5	1	1	3	1
155	1	1	0	2	0	4	0	5	3	3	3	1	1	0	2	0	4	0	5	3	3	3	4	2	4	2	1	1	1	1	1	4	4	3	3	4	5	4	3	5	5	2	2	4
156	1	1	0	2	0	4	0	5	3	3	3	1	1	0	2	0	4	0	5	3	3	3	4	2	3	2	1	1	1	1	3	4	4	2	4	2	5	4	4	4	4	1	2	4
157	1	1	0	2	0	4	0	5	3	3	3	1	1	0	2	0	4	0	5	3	3	3	2	2	4	2	1	1	2	1	1	4	4	4	4	2	2	2	3	1	3	3	2	4
158	1	1	0	2	0	4	0	5	3	2	2	1	1	0	2	0	4	0	5	3	2	2	2	3	4	2	1	1	3	2	1	2	3	2	3	3	4	4	3	6	5	2	3	4
159	1	1	0	2	0	4	0	5	3	2	2	1	1	0	2	0	4	0	5	3	2	2	3	4	4	2	97	97	1	2	2	3	2	3	1	2	3	6	6	6	2	1	3	2
160	1	1	0	2	0	4	0	5	3	2	2	1	1	0	2	0	4	0	5	3	2	2	2	3	4	2	1	1	4	1	1	4	2	2	2	2	4	6	4	7	3	2	1	2
161	1	1	0	2	0	4	0	5	3	2	2	1	1	0	2	0	4	0	5	3	2	2	2	4	4	2	1	1	1	1	1	3	5	2	5	3	2	5	5	5	1	2	2	3
162	1	1	0	2	0	4	0	5	3	2	2	1	1	0	2	0	4	0	5	3	2	2	5	1	5	2	1	1	1	1	1	4	4	1	2	1	5	1	1	1	1	1	2	2
163	1	1	0	2	0	4	0	5	3	2	2	1	1	0	2	0	4	0	5	3	2	2	5	1	4	2	97	97	3	1	3	1	1	1	5	1	5	1	1	1	5	1	2	5
164	1	1	0	2	0	4	0	5	3	2	2	1	1	0	2	0	4	0	5	3	2	2	3	3	4	2	1	1	3	1	3	4	4	2	4	4	4	5	5	4	4	1	1	1
165	1	1	0	2	0	4	0	5	3	2	2	1	1	0	2	0	4	0	5	3	2	2	2	4	5	2	1	1	3	1	1	2	4	2	1	2	4	7	5	8	5	2	3	4
166	1	1	0	2	0	4	0	5	3	2	2	1	1	0	2	0	4	0	5	3	2	2	3	4	5	3	1	2	1	1	1	4	4	2	1	1	4	7	5	7	3	2	3	1
167	1	1	0	2	0	4	0	5	3	2	2	1	1	0	2	0	4	0	5	3	2	2	3	3	4	2	1	1	4	1	3	2	4	3	1	1	5	6	5	8	6	3	3	4
168	1	1	0	2	0	4	0	5	3	2	2	1	1	0	2	0	4	0	5	3	2	2	2	3	4	2	1	1	2	1	1	4	2	4	4	1	3	6	4	8	3	1	3	2
169	1	1	0	2	0	4	0	5	3	2	2	1	1	0	2	0	4	0	5	3	2	2	2	2	5	1	0	1	5	1	3	4	2	4	2	4	5	4	4	7	5	2	3	4
170	1	1	0	2	0	4	0	5	3	2	2	1	1	0	2	0	4	0	5	3	2	2	2	3	4	2	1	1	1	1	2	2	4	4	4	2	3	5	4	5	1	2	3	2
171	1	1	0	2	0	4	0	5	3	2	2	1	1	0	2	0	4	0	5	3	2	2	3	3	4	2	1	1	3	1	1	4	2	4	2	4	4	6	6	6	6	1	1	4
172	1	1	0	3	0	4	0	4	3	2	2	1	1	0	3	0	4	0	4	3	2	2	2	4	5	6	6	0	2	1	1	4	5	5	5	4	3	5	7	3	7	2	3	2
173	1	1	0	3	0	4	0	4	3	2	2	1	1	0	3	0	4	0	4	3	2	2	2	1	5	3	2	1	4	1	1	2	5	5	2	1	1	7	3	10	3	2	3	2
174	1	1	0	3	0	4	0	4	3	2	2	1	1	0	3	0	4	0	4	3	2	2	1	4	5	2	97	97	2	1	1	4	1	2	1	1	5	5	2	7	3	1	1	1
175	1	1	0	3	0	4	0	4	3	2	2	1	1	0	3	0	4	0	4	3	2	2	3	2	3	2	1	1	3	1	3	2	3	3	3	2	4	3	3	4	3	3	3	4
176	1	1	0	3	0	4	0	4	3	2	2	1	1	0	3	0	4	0	4	3	2	2	4	2	4	1	0	1	3	1	1	4	4	3	4	2	4	3	1	5	5	3	3	3
177	1	1	0	3	0	4	0	4	3	2	2	1	1	0	3	0	4	0	4	3	2	2	4	3	3	2	1	1	3	1	1	1	4	1	2	1	5	1	2	5	1	2	3	3
178	1	1	0	3	0	4	0	4	3	2	2	1	1	0	3	0	4	0	4	3	2	2	4	3	5	2	1	1	3	1	1	2	2	2	3	1	4	5	5	7	4	2	1	4
179	1	1	0	3	0	4	0	4	3	2	2	1	1	0	3	0	4	0	4	3	2	2	2	4	5	2	1	1	3	2	4	4	2	2	2	1	5	7	7	9	6	-8	3	4
180	1	1	0	3	0	4	1	4	3	2	2	1	1	0	3	0	4	1	4	3	2	2	2	3	4	2	1	1	1	1	1	4	4	3	4	1	2	4	4	6	4	3	3	4
181	1	1	0	3	0	4	1	4	3	2	2	1	1	0	3	0	4	1	4	3	2	2	2	4	4	2	1	1	4	1	1	2	4	4	4	4	4	9	7	-8	5	1	2	2
182	1	1	0	3	0	4	1	4	3	2	2	1	1	0	3	0	4	1	4	3	2	2	4	2	3	2	1	1	3	1	2	2	4	2	4	2	4	3	1	4	2	1	1	2
183	1	1	0	3	0	4	1	4	3	2	2	1	1	0	3	0	4	1	4	3	2	2	4	1	2	2	1	1	2	2	1	1	1	1	5	1	4	1	2	3	1	3	3	-8
184	1	1	0	3	0	4	1	4	3	2	2	1	1	0	3	0	4	1	4	3	2	2	4	2	5	3	2	1	3	1	2	2	4	3	2	1	4	4	2	6	3	1	1	5
185	1	1	0	3	0	4	1	4	3	2	2	1	1	0	3	0	4	1	4	3	2	2	3	4	5	2	0	2	1	1	1	2	4	2	1	1	4	6	7	7	8	1	2	-8
186	1	1	0	3	0	4	1	4	3	2	2	1	1	0	3	0	4	1	4	3	2	2	2	3	4	3	0	3	5	1	4	4	2	2	2	1	5	4	2	6	5	2	3	5
187	1	1	0	3	0	4	1	4	3	2	2	1	1	0	3	0	4	1	4	3	2	2	3	3	3	2	1	1	3	2	3	4	1	1	1	1	5	5	1	7	4	2	3	3
188	1	1	0	3	0	4	1	4	3	2	2	1	1	0	3	0	4	1	4	3	2	2	2	3	4	2	1	1	2	2	1	4	3	3	3	2	4	5	4	6	2	2	1	4
189	1	1	0	3	0	4	1	4	3	2	2	1	1	0	3	0	4	1	4	3	2	2	1	2	4	2	2	0	1	1	1	3	5	5	5	5	5	5	4	5	4	1	3	3
190	1	1	0	3	0	4	1	4	3	2	2	1	1	0	3	0	4	1	4	3	2	2	2	2	3	2	1	1	5	1	3	4	1	1	1	1	4	3	3	6	5	2	3	4
191	1	1	0	3	0	4	1	4	3	2	2	1	1	0	3	0	4	1	4	3	2	2	2	2	3	1	1	0	1	1	1	1	1	4	3	2	4	5	5	5	3	1	1	1
192	1	1	0	3	0	4	1	4	3	2	2	1	1	0	3	0	4	1	4	3	2	2	5	1	4	3	2	1	5	5	5	1	1	1	5	1	1	1	1	2	1	1	3	5
193	1	1	0	3	0	4	1	4	3	2	2	1	1	0	3	0	4	1	4	3	2	2	4	2	4	5	2	3	5	1	3	2	1	1	3	2	3	6	8	8	8	3	3	5
194	1	1	0	3	0	4	1	4	3	2	2	1	1	0	3	0	4	1	4	3	2	2	2	4	4	1	0	1	2	2	2	2	5	5	5	2	5	4	3	-8	3	2	3	2
195	1	1	0	3	0	4	1	4	3	2	2	1	1	0	3	0	4	1	4	3	2	2	4	2	4	2	97	97	2	1	3	2	3	2	1	1	3	5	5	5	5	2	1	4
196	1	1	0	3	1	4	1	4	3	2	2	1	1	0	3	1	4	1	4	3	2	2	4	2	3	2	1	1	3	3	1	4	4	4	3	1	3	4	1	7	3	2	3	3
197	1	1	0	3	1	4	1	4	3	2	2	1	1	0	3	1	4	1	4	3	2	2	4	3	4	2	97	97	4	3	4	4	4	2	2	1	5	5	4	6	5	1	1	2
198	1	1	0	3	1	4	1	4	3	2	2	1	1	0	3	1	4	1	4	3	2	2	3	2	4	1	0	1	3	1	3	4	2	2	2	1	4	4	3	5	3	2	3	2
199	1	1	0	3	1	4	1	4	3	2	2	1	1	0	3	1	4	1	4	3	2	2	4	3	4	2	97	97	1	1	1	4	2	2	5	1	4	6	5	2	5	1	1	4
200	1	1	0	3	1	4	1	4	3	2	2	1	1	0	3	1	4	1	4	3	2	2	5	3	5	0	0	0	4	1	3	4	4	1	2	1	4	5	8	5	10	2	3	3
201	1	1	0	3	1	4	1	4	3	2	2	1	1	0	3	1	4	1	4	3	2	2	2	3	5	2	1	1	1	1	1	2	2	2	2	2	5	5	5	6	6	2	3	4
202	1	1	0	3	1	4	1	4	3	2	2	1	1	0	3	1	4	1	4	3	2	2	4	3	5	2	1	1	3	1	1	4	5	4	3	2	5	4	5	8	4	2	3	2
203	1	1	0	3	1	4	1	4	3	2	2	1	1	0	3	1	4	1	4	3	2	2	3	3	5	2	1	1	1	1	1	4	2	3	2	2	5	6	6	6	2	1	2	5
204	1	1	0	3	1	4	1	4	3	2	2	1	1	0	3	1	4	1	4	3	2	2	3	4	5	1	97	97	1	1	1	4	1	1	2	1	5	3	3	4	1	1	1	4
205	1	1	0	3	1	4	1	4	3	2	2	1	1	0	3	1	4	1	4	3	2	2	1	2	4	1	1	0	1	1	1	4	2	2	4	2	5	4	4	4	4	1	1	2
206	1	1	0	3	1	4	1	4	3	2	2	1	1	0	3	1	4	1	4	3	2	2	4	4	4	2	1	1	1	1	1	2	5	2	5	1	5	4	1	4	4	3	3	4
207	1	1	0	3	1	4	1	4	3	2	2	1	1	0	3	1	4	1	4	3	2	2	2	1	4	3	97	97	5	1	3	1	5	1	5	3	2	1	1	1	1	2	2	5
208	1	1	0	3	1	4	1	4	3	2	2	1	1	0	3	1	4	1	4	3	2	2	3	3	4	2	1	1	3	1	3	4	2	2	2	1	4	6	6	-8	6	2	1	4
209	1	1	0	3	1	4	1	4	3	2	2	1	1	0	3	1	4	1	4	3	2	2	3	3	4	3	1	2	3	2	1	2	3	4	4	3	4	6	3	8	2	2	3	1
210	1	1	0	3	1	4	1	4	3	2	2	1	1	0	3	1	4	1	4	3	2	2	4	2	4	2	1	1	3	2	2	4	3	4	4	2	5	1	1	1	1	1	2	2
211	1	1	0	3	1	4	1	4	3	2	2	1	1	0	3	1	4	1	4	3	2	2	2	4	4	1	97	97	1	1	1	2	1	2	2	3	-8	5	5	5	4	1	3	2
212	1	1	0	3	1	4	1	4	3	2	2	1	1	0	3	1	4	1	4	3	2	2	3	4	5	2	1	1	1	1	1	2	1	1	1	5	3	5	1	8	2	2	3	1
213	1	1	0	3	1	4	1	4	3	2	2	1	1	0	3	1	4	1	4	3	2	2	4	4	5	1	0	1	1	1	1	1	2	2	2	1	5	5	2	5	2	2	2	-8
214	1	1	0	3	1	4	1	4	3	2	2	1	1	0	3	1	4	1	4	3	2	2	2	4	4	2	1	1	3	2	3	4	3	2	2	1	4	5	3	6	5	2	1	2
215	1	1	0	3	1	4	1	4	3	2	2	1	1	0	3	1	4	1	4	3	2	2	3	3	3	2	1	1	3	1	1	4	5	5	4	2	5	1	3	10	1	3	3	3
216	1	1	0	3	1	4	1	4	3	2	2	1	1	0	3	1	4	1	4	3	2	2	4	4	4	1	1	0	4	1	1	4	4	3	3	1	3	6	3	6	1	3	1	2
217	1	1	0	3	1	4	1	4	3	2	2	1	1	0	3	1	4	1	4	3	2	2	2	4	4	0	0	0	3	1	3	4	2	2	2	2	3	4	3	5	2	1	3	3
218	1	1	0	3	1	4	1	4	3	2	2	1	1	0	3	1	4	1	4	3	2	2	1	4	4	2	1	1	2	2	2	4	4	2	4	1	4	6	2	8	2	2	3	2
219	1	1	0	3	1	4	1	4	3	2	2	1	1	0	3	1	4	1	4	3	2	2	5	1	4	1	0	1	3	1	1	3	1	2	3	3	5	1	2	1	5	1	1	5
220	1	1	0	3	1	4	1	4	3	2	2	1	1	0	3	1	4	1	4	3	2	2	1	4	5	3	2	1	1	1	3	4	4	4	4	2	4	5	5	6	1	2	3	5
221	1	1	0	3	1	4	1	4	3	2	2	1	1	0	3	1	4	1	4	3	2	2	3	4	4	1	97	97	1	1	1	1	2	2	2	1	5	3	3	5	3	3	2	2
222	1	1	0	3	1	4	1	4	3	2	2	1	1	0	3	1	4	1	4	3	2	2	2	2	3	2	1	1	1	1	1	1	4	4	4	2	5	3	1	4	1	1	1	2
223	1	1	0	3	1	4	1	4	3	2	2	1	1	0	3	1	4	1	4	3	2	2	5	1	2	1	0	1	5	1	1	2	5	1	5	5	5	1	5	5	2	2	3	1
224	1	1	0	3	0	4	1	4	3	2	2	1	1	0	3	0	4	1	4	3	2	2	2	4	5	1	1	0	1	1	1	1	2	2	1	4	3	5	4	6	2	2	2	4
225	1	1	0	3	0	4	1	4	3	2	2	1	1	0	3	0	4	1	4	3	2	2	4	5	3	2	1	1	5	1	3	2	4	3	2	1	5	2	1	8	3	3	3	2
226	1	1	0	3	0	4	1	4	3	2	2	1	1	0	3	0	4	1	4	3	2	2	4	4	5	2	1	1	4	1	1	2	5	3	1	1	5	5	3	8	2	1	1	1
227	1	1	0	3	0	4	1	4	3	2	2	1	1	0	3	0	4	1	4	3	2	2	4	2	4	2	97	97	1	1	1	1	4	4	4	4	4	1	9	5	10	2	3	2
228	1	1	0	3	0	4	1	4	3	2	2	1	1	0	3	0	4	1	4	3	2	2	5	1	5	1	97	97	3	3	1	4	1	1	1	1	5	1	1	1	1	2	3	3
229	1	1	0	3	0	4	1	4	3	2	2	1	1	0	3	0	4	1	4	3	2	2	4	3	3	2	1	1	3	1	3	1	3	2	5	4	4	5	4	5	2	2	1	3
230	1	1	0	3	0	4	1	4	3	2	2	1	1	0	3	0	4	1	4	3	2	2	5	3	4	97	97	97	4	1	1	4	2	2	2	2	4	5	5	5	1	1	3	4
231	1	1	0	3	0	4	1	4	3	2	2	1	1	0	3	0	4	1	4	3	2	2	4	4	5	1	1	0	1	1	1	2	2	2	2	3	4	5	5	5	5	2	3	3
232	1	1	0	3	0	4	1	4	3	2	2	1	1	0	3	0	4	1	4	3	2	2	4	4	4	2	1	1	4	4	2	4	3	3	3	3	3	6	6	6	6	1	2	2
233	1	1	0	3	0	4	1	4	3	2	2	1	1	0	3	0	4	1	4	3	2	2	4	4	5	2	1	1	1	1	1	4	4	2	4	4	3	5	4	5	3	1	2	2
234	1	1	0	3	0	4	1	4	3	2	2	1	1	0	3	0	4	1	4	3	2	2	2	1	2	2	1	1	5	3	3	1	4	4	4	3	4	5	6	4	5	3	3	4
235	1	1	0	3	0	4	1	4	3	2	2	1	1	0	3	0	4	1	4	3	2	2	2	3	5	1	97	97	1	1	1	4	2	2	5	1	3	3	3	5	2	1	2	4
236	1	1	0	3	0	4	1	4	3	2	2	1	1	0	3	0	4	1	4	3	2	2	5	2	4	1	97	97	3	1	1	2	4	4	2	1	5	7	4	7	4	1	3	4
237	1	1	0	3	0	4	1	4	3	2	2	1	1	0	3	0	4	1	4	3	2	2	4	4	4	2	1	1	2	1	1	4	4	2	3	1	2	5	5	4	2	3	3	2
238	1	1	0	3	0	4	1	4	3	2	2	1	1	0	3	0	4	1	4	3	2	2	3	3	5	2	1	1	3	5	1	2	1	1	1	1	2	5	5	7	5	3	3	1
239	1	1	0	3	0	4	1	4	3	2	2	1	1	0	3	0	4	1	4	3	2	2	4	2	3	1	1	0	3	3	3	2	4	3	2	1	4	1	1	1	1	1	3	3
240	1	1	0	3	0	3	1	4	3	2	2	1	1	0	3	0	3	1	4	3	2	2	2	2	4	2	1	1	4	1	4	2	4	1	1	1	5	6	4	8	6	2	3	2
241	1	1	0	3	0	3	1	4	3	2	2	1	1	0	3	0	3	1	4	3	2	2	2	2	4	2	1	1	3	3	3	4	3	3	2	2	3	5	3	6	5	2	3	3
242	1	1	0	3	0	3	1	4	3	2	2	1	1	0	3	0	3	1	4	3	2	2	2	3	4	2	1	1	5	2	1	1	2	1	1	1	4	-8	-8	-8	-8	3	3	4
243	1	1	0	3	0	3	1	3	3	2	2	1	1	0	3	0	3	1	3	3	2	2	5	2	3	1	0	1	1	1	1	2	5	4	2	1	3	4	6	3	6	1	1	5
244	1	1	0	3	0	3	1	3	3	2	2	1	1	0	3	0	3	1	3	3	2	2	4	2	4	2	1	1	3	1	1	1	2	2	4	4	5	3	2	2	2	2	2	4
245	1	1	0	3	0	3	1	3	3	2	2	1	1	0	3	0	3	1	3	3	2	2	4	4	5	2	1	1	1	1	3	3	4	2	2	1	5	5	5	5	3	1	2	2
246	1	1	0	3	0	3	1	3	3	2	2	1	1	0	3	0	3	1	3	3	2	2	3	2	4	2	1	1	3	1	1	2	4	4	4	4	4	3	3	7	3	3	3	4
247	1	1	0	3	0	3	1	3	3	2	2	1	1	0	3	0	3	1	3	3	2	2	3	4	5	3	2	1	3	1	1	2	4	3	3	3	1	5	1	6	3	2	1	3
248	1	1	0	3	0	3	1	3	3	2	2	1	1	0	3	0	3	1	3	3	2	2	4	5	4	2	1	1	1	1	1	4	2	4	5	2	3	10	1	10	1	2	3	2
249	1	1	0	3	0	3	1	3	3	2	2	1	1	0	3	0	3	1	3	3	2	2	2	2	4	2	2	0	1	2	1	2	5	4	1	4	5	1	1	1	1	1	3	1
250	1	1	0	3	0	3	1	3	3	2	2	1	1	0	3	0	3	1	3	3	2	2	4	4	5	2	1	1	1	1	1	4	4	4	4	3	4	4	4	3	5	1	1	4
251	1	1	0	3	0	3	1	3	3	2	2	1	1	0	3	0	3	1	3	3	2	2	4	3	4	2	97	97	4	1	4	1	5	2	3	2	5	5	3	5	2	3	3	5
252	1	1	0	3	0	3	1	3	3	2	2	1	1	0	3	0	3	1	3	3	2	2	3	3	4	2	1	1	2	1	3	3	2	2	2	1	4	5	5	5	3	2	2	3
253	1	1	0	3	0	3	1	3	3	2	2	1	1	0	3	0	3	1	3	3	2	2	2	4	4	1	97	97	3	1	-8	2	4	2	1	1	5	2	1	4	1	2	3	2
254	1	1	0	3	0	3	1	3	3	2	2	1	1	0	3	0	3	1	3	3	2	2	1	4	4	1	0	1	1	1	1	1	2	2	2	1	2	5	6	5	2	2	3	1
255	1	1	0	3	0	3	1	3	3	2	2	1	1	0	3	0	3	1	3	3	2	2	3	3	4	2	1	1	1	1	3	4	1	2	3	1	5	5	3	5	5	1	1	1
256	1	1	0	3	0	3	1	3	3	2	2	1	1	0	3	0	3	1	3	3	2	2	5	2	5	2	1	1	4	1	1	4	1	1	4	1	4	5	5	7	5	1	3	2
257	1	1	0	3	0	3	1	3	3	2	2	1	1	0	3	0	3	1	3	3	2	2	2	4	5	2	1	1	1	1	1	4	4	2	5	1	5	4	3	4	1	1	2	2
258	1	1	0	3	0	3	1	3	3	2	2	1	1	0	3	0	3	1	3	3	2	2	4	1	5	1	97	97	3	3	1	4	2	2	2	1	4	5	5	-8	5	2	1	5
259	1	1	0	3	0	3	1	3	3	2	2	1	1	0	3	0	3	1	3	3	2	2	1	3	4	2	1	1	1	1	1	4	5	1	5	1	5	8	2	8	4	2	1	1
260	1	1	0	3	0	3	1	3	3	2	2	1	1	0	3	0	3	1	3	3	2	2	1	2	4	2	1	1	1	1	1	4	1	1	5	5	1	6	3	7	3	1	1	1
261	1	1	0	3	0	3	1	3	3	2	2	1	1	0	3	0	3	1	3	3	2	2	2	2	4	2	1	1	5	1	5	3	1	1	1	1	4	6	3	7	7	2	3	4
262	1	1	0	3	0	3	1	3	3	2	2	1	1	0	3	0	3	1	3	3	2	2	4	2	2	2	97	97	3	1	3	4	4	1	5	1	5	4	6	6	5	3	3	2
263	1	1	0	3	0	3	1	3	3	2	2	1	1	0	3	0	3	1	3	3	2	2	1	5	3	4	2	2	5	1	3	2	1	1	4	1	2	2	5	5	5	2	3	1
264	1	1	0	3	0	3	1	3	3	2	2	1	1	0	3	0	3	1	3	3	2	2	3	4	4	2	1	1	2	1	1	4	4	2	2	3	3	5	4	6	4	3	3	3
265	1	1	0	3	0	3	1	3	3	2	2	1	1	0	3	0	3	1	3	3	2	2	2	4	5	2	1	1	4	1	1	4	2	2	1	1	5	5	3	8	3	3	1	1
266	1	1	0	3	0	3	1	3	3	2	2	1	1	0	3	0	3	1	3	3	2	2	3	2	4	2	1	1	3	3	4	1	2	2	2	1	5	5	5	5	5	2	3	5
267	1	1	0	3	0	3	1	3	3	2	2	1	1	0	3	0	3	1	3	3	2	2	2	2	4	2	1	1	2	1	1	1	4	4	4	2	4	2	4	2	6	1	2	4
268	1	1	0	3	0	3	1	3	3	2	2	1	1	0	3	0	3	1	3	3	2	2	4	4	5	2	1	1	1	1	1	3	2	4	2	2	5	5	4	6	2	2	3	1
269	1	1	0	3	0	3	1	3	3	2	2	1	1	0	3	0	3	1	3	3	2	2	4	3	2	2	1	1	3	1	3	4	3	3	2	1	4	4	1	6	2	2	3	4
270	1	1	0	3	0	3	1	3	3	2	2	1	1	0	3	0	3	1	3	3	2	2	4	4	5	2	97	97	2	1	1	2	2	4	1	5	4	6	4	7	2	1	2	1
271	1	1	0	3	0	3	1	3	3	2	2	1	1	0	3	0	3	1	3	3	2	2	5	4	5	2	1	1	1	1	1	4	5	3	2	1	1	7	4	8	5	3	3	2
272	1	1	0	3	0	3	1	3	3	2	2	1	1	0	3	0	3	1	3	3	2	2	2	4	4	2	1	1	3	3	3	2	1	4	4	1	5	5	5	5	5	1	2	1
273	1	1	0	3	0	3	1	3	3	2	2	1	1	0	3	0	3	1	3	3	2	2	2	4	3	2	97	97	5	1	1	4	4	2	4	2	3	6	5	8	4	3	3	4
274	1	1	0	3	0	3	1	3	3	2	2	1	1	0	3	0	3	1	3	3	2	2	4	4	4	2	1	1	3	1	3	4	2	4	3	1	4	4	3	7	2	2	3	2
275	1	1	0	3	0	3	1	3	3	2	2	1	1	0	3	0	3	1	3	3	2	2	2	4	2	1	97	97	1	1	1	2	4	2	3	1	5	2	7	2	1	2	3	2
276	1	1	0	3	0	3	1	3	3	2	2	1	1	0	3	0	3	1	3	3	2	2	3	4	4	2	1	1	1	1	1	4	2	2	4	4	4	5	5	5	1	2	2	1
277	1	1	0	3	0	3	1	3	3	2	2	1	1	0	3	0	3	1	3	3	2	2	2	2	5	97	97	97	2	1	2	2	5	5	2	2	5	6	3	8	4	2	3	2
278	1	1	0	3	0	3	1	3	3	2	2	1	1	0	3	0	3	1	3	3	2	2	4	2	4	2	1	1	5	-8	5	4	1	1	1	1	5	5	5	7	5	3	3	1
279	1	1	0	3	0	3	1	3	3	2	2	1	1	0	3	0	3	1	3	3	2	2	2	2	3	1	1	0	3	1	1	2	2	2	2	2	3	3	1	6	3	2	-8	4
280	1	1	0	3	0	3	1	3	3	2	2	1	1	0	3	0	3	1	3	3	2	2	4	4	4	2	97	97	2	1	1	1	2	2	3	3	3	1	1	1	5	3	2	3
281	1	1	0	3	0	3	1	3	3	2	2	1	1	0	3	0	3	1	3	3	2	2	2	1	4	4	1	3	2	1	2	4	4	4	1	1	1	5	5	7	4	3	3	5
282	1	1	1	3	0	3	1	3	3	2	2	1	1	1	3	0	3	1	3	3	2	2	3	3	5	2	1	1	3	1	3	-8	3	2	1	1	4	1	1	4	1	2	3	2
283	1	1	1	3	0	3	1	3	3	2	2	1	1	1	3	0	3	1	3	3	2	2	2	3	4	2	97	97	3	2	2	2	3	2	3	1	5	4	4	5	4	2	3	3
284	1	1	1	3	0	3	1	3	3	2	2	1	1	1	3	0	3	1	3	3	2	2	4	4	4	1	1	0	2	2	2	4	2	4	4	2	4	6	6	6	1	1	2	2
285	1	1	1	3	0	3	1	3	3	2	2	1	1	1	3	0	3	1	3	3	2	2	5	4	4	2	1	1	2	2	2	2	4	4	2	4	5	3	2	5	2	2	3	4
286	1	1	1	3	0	3	1	3	3	2	2	1	1	1	3	0	3	1	3	3	2	2	2	4	4	2	1	1	1	1	1	4	5	2	1	1	5	5	3	7	1	1	3	5
287	1	1	1	3	0	3	1	3	3	2	2	1	1	1	3	0	3	1	3	3	2	2	4	4	5	1	0	1	3	1	1	4	4	4	2	1	4	5	5	5	5	1	2	1
288	1	1	1	3	0	3	1	3	3	2	2	1	1	1	3	0	3	1	3	3	2	2	5	3	5	4	97	97	1	1	1	4	5	4	5	4	4	5	10	10	8	2	3	1
289	1	1	1	3	0	3	1	3	3	2	2	1	1	1	3	0	3	1	3	3	2	2	2	3	3	2	97	97	1	1	1	4	4	2	4	2	3	4	5	4	7	1	2	2
290	1	1	1	3	0	3	1	3	3	2	2	1	1	1	3	0	3	1	3	3	2	2	2	3	5	2	1	1	1	1	1	2	5	2	4	5	5	1	1	-8	1	1	2	4
291	1	1	1	3	0	3	1	3	3	2	2	1	1	1	3	0	3	1	3	3	2	2	4	3	4	2	1	1	2	1	1	4	4	4	2	2	5	6	6	6	6	2	1	2
292	1	1	1	3	0	3	1	3	3	2	2	1	1	1	3	0	3	1	3	3	2	2	4	3	4	2	97	97	1	1	1	4	3	3	4	2	3	3	3	3	6	2	3	4
293	1	1	1	3	0	3	1	3	3	2	2	1	1	1	3	0	3	1	3	3	2	2	4	3	5	2	1	1	4	1	4	4	5	2	2	1	5	6	4	8	3	3	1	1
294	1	1	1	3	0	3	1	3	3	2	2	1	1	1	3	0	3	1	3	3	2	2	3	4	5	1	0	1	1	1	1	3	4	3	4	3	4	4	3	6	1	1	2	1
295	1	1	1	3	0	3	1	3	3	2	2	1	1	1	3	0	3	1	3	3	2	2	3	2	4	2	1	1	3	3	1	4	4	3	4	2	4	5	1	8	1	2	3	5
296	1	1	1	3	0	3	1	3	3	2	2	1	1	1	3	0	3	1	3	3	2	2	2	2	4	2	1	1	4	1	4	4	2	2	2	1	4	6	5	7	5	2	3	3
297	1	1	1	3	0	3	1	3	3	2	2	1	1	1	3	0	3	1	3	3	2	2	2	4	5	3	2	1	1	1	1	1	4	4	4	3	4	4	4	4	3	1	2	2
298	1	1	1	3	0	3	1	3	3	2	2	1	1	1	3	0	3	1	3	3	2	2	2	3	4	2	1	1	2	1	1	4	4	3	4	1	4	3	1	6	7	2	3	2
299	1	1	1	3	0	3	1	3	3	2	2	1	1	1	3	0	3	1	3	3	2	2	-8	5	5	0	0	0	5	3	5	4	2	1	1	1	5	6	5	6	6	2	3	3
300	1	1	1	3	0	3	1	3	3	2	2	1	1	1	3	0	3	1	3	3	2	2	3	5	5	-2	-2	-2	-8	1	1	1	5	2	-8	2	1	5	5	5	5	1	3	3
301	1	1	1	3	0	3	1	3	3	2	2	1	1	1	3	0	3	1	3	3	2	2	4	1	3	2	97	97	2	2	1	4	4	2	5	4	4	3	5	-8	4	2	1	2
302	1	1	1	3	0	3	1	3	3	2	2	1	1	1	3	0	3	1	3	3	2	2	2	4	5	1	97	97	1	1	1	4	1	1	1	1	5	6	5	7	1	1	2	-8
303	1	1	1	3	0	3	1	3	3	2	2	1	1	1	3	0	3	1	3	3	2	2	5	3	3	2	1	1	3	3	3	1	3	3	5	2	3	4	4	3	8	1	2	3
304	1	1	1	3	0	3	1	3	3	2	2	1	1	1	3	0	3	1	3	3	2	2	5	3	5	1	0	1	4	1	3	1	1	5	3	2	4	1	1	5	1	2	1	1
305	1	1	1	3	0	3	2	3	3	2	2	1	1	1	3	0	3	2	3	3	2	2	4	3	4	2	1	1	1	1	3	2	4	4	2	-8	4	2	5	3	5	2	3	5
306	1	1	1	3	0	3	2	3	3	2	2	1	1	1	3	0	3	2	3	3	2	2	3	2	4	2	1	1	4	1	3	4	4	4	2	2	4	4	3	5	3	2	3	2
307	1	1	1	3	0	3	2	3	3	2	2	1	1	1	3	0	3	2	3	3	2	2	4	4	5	2	2	0	1	1	1	3	1	1	1	1	3	5	5	5	10	1	2	2
308	1	1	1	3	0	3	2	3	3	2	2	1	1	1	3	0	3	2	3	3	2	2	3	4	3	2	1	1	3	2	1	2	4	2	2	2	4	6	5	7	5	2	-8	4
309	1	1	1	3	0	3	2	3	3	2	2	1	1	1	3	0	3	2	3	3	2	2	2	3	5	4	2	2	2	4	5	4	3	2	2	3	2	1	1	5	1	2	1	4
310	1	1	1	3	0	3	2	3	3	2	2	1	1	1	3	0	3	2	3	3	2	2	2	2	4	0	0	0	3	3	5	1	4	4	5	3	3	5	7	8	5	2	3	5
311	1	1	1	3	0	3	2	3	3	2	2	1	1	1	3	0	3	2	3	3	2	2	4	5	5	2	1	1	3	3	3	1	5	5	5	5	5	4	5	5	1	1	3	3
312	1	1	1	3	0	3	2	3	3	2	2	1	1	1	3	0	3	2	3	3	2	2	2	4	4	2	1	1	4	2	4	2	3	3	4	2	4	6	5	7	6	2	3	2
313	1	1	1	3	0	3	2	3	3	2	2	1	1	1	3	0	3	2	3	3	2	2	2	4	5	2	1	1	1	1	1	4	4	2	4	2	4	5	4	6	2	1	1	1
314	1	1	1	3	0	3	2	3	3	2	2	1	1	1	3	0	3	2	3	3	2	2	5	1	2	2	1	1	1	1	1	1	1	1	1	1	5	2	7	1	1	2	2	3
315	1	1	1	3	0	3	2	3	3	2	2	1	1	1	3	0	3	2	3	3	2	2	4	4	5	3	1	2	1	1	1	2	4	4	4	2	2	4	3	7	2	3	3	4
316	1	1	1	3	0	3	2	3	3	2	2	1	1	1	3	0	3	2	3	3	2	2	3	4	4	0	0	0	2	1	3	2	2	2	1	1	5	5	1	7	2	2	3	4
317	1	1	1	3	0	3	2	3	3	2	2	1	1	1	3	0	3	2	3	3	2	2	5	3	4	2	1	1	4	4	1	4	4	2	4	2	4	1	1	3	1	3	3	2
318	1	1	1	3	0	3	2	3	3	2	2	1	1	1	3	0	3	2	3	3	2	2	2	3	4	2	1	1	3	2	1	4	3	2	4	2	4	2	3	3	5	2	1	3
319	1	1	1	3	0	3	2	3	3	2	2	1	1	1	3	0	3	2	3	3	2	2	4	3	4	2	1	1	3	1	3	4	2	3	4	1	5	2	1	3	1	2	3	2
320	1	1	1	4	0	3	2	3	3	2	2	1	1	1	4	0	3	2	3	3	2	2	2	2	4	2	1	1	3	3	2	2	2	2	2	2	2	5	5	5	2	2	3	4
321	1	1	1	4	0	3	2	3	3	2	2	1	1	1	4	0	3	2	3	3	2	2	3	3	4	2	0	2	3	2	1	4	4	2	4	2	2	7	5	8	5	1	2	-8
322	1	1	1	4	0	3	2	3	3	2	2	1	1	1	4	0	3	2	3	3	2	2	2	2	4	2	1	1	2	1	1	4	4	4	4	1	5	4	2	6	7	3	3	5
323	1	1	1	4	0	3	2	3	3	2	2	1	1	1	4	0	3	2	3	3	2	2	3	4	4	1	97	97	2	2	-8	4	4	2	4	2	5	4	4	4	4	2	3	4
324	1	1	1	4	0	3	2	3	3	2	2	1	1	1	4	0	3	2	3	3	2	2	5	1	2	1	1	0	3	1	1	1	5	2	5	1	3	2	10	2	5	2	1	4
325	1	1	1	4	0	3	2	3	3	2	2	1	1	1	4	0	3	2	3	3	2	2	3	4	5	2	1	1	1	1	1	2	3	2	2	1	1	4	4	7	5	1	3	2
326	1	1	1	4	0	3	2	3	3	2	2	1	1	1	4	0	3	2	3	3	2	2	4	4	5	1	0	1	5	1	1	4	5	4	5	1	5	7	5	9	2	2	3	5
327	1	1	1	4	0	3	2	3	3	2	2	1	1	1	4	0	3	2	3	3	2	2	3	2	5	3	2	1	1	1	1	4	5	5	4	3	3	5	5	5	1	1	2	2
328	1	1	1	4	0	3	2	3	3	2	2	1	1	1	4	0	3	2	3	3	2	2	5	2	4	2	1	1	2	1	1	1	1	1	1	1	5	1	1	1	4	2	2	4
329	1	1	1	4	0	3	2	3	3	2	2	1	1	1	4	0	3	2	3	3	2	2	1	2	5	2	1	1	1	1	1	1	5	1	5	1	5	4	2	1	1	1	3	4
330	1	1	1	4	0	3	2	3	2	2	2	1	1	1	4	0	3	2	3	2	2	2	2	4	4	2	97	97	3	1	5	4	4	2	2	2	4	5	5	7	5	2	3	4
331	1	1	1	4	0	3	2	3	2	2	2	1	1	1	4	0	3	2	3	2	2	2	1	5	5	4	2	2	1	1	1	2	2	2	2	1	5	10	5	10	2	1	1	2
332	1	1	1	4	0	3	2	3	2	2	2	1	1	1	4	0	3	2	3	2	2	2	4	3	5	3	1	2	3	1	1	2	1	3	4	3	5	5	5	5	4	3	3	2
333	1	1	1	4	0	3	2	3	2	2	2	1	1	1	4	0	3	2	3	2	2	2	2	1	4	0	0	0	1	1	1	1	2	1	2	1	4	3	3	3	1	1	1	4
334	1	1	1	4	0	3	2	3	2	2	2	1	1	1	4	0	3	2	3	2	2	2	2	3	5	5	3	2	1	1	1	3	4	4	3	4	4	6	5	6	3	1	1	2
335	1	1	1	4	0	3	2	3	2	2	2	1	1	1	4	0	3	2	3	2	2	2	4	4	4	4	3	1	1	1	1	4	2	2	4	1	5	5	5	4	3	1	2	1
336	1	1	1	4	0	3	2	3	2	2	2	1	1	1	4	0	3	2	3	2	2	2	4	4	4	2	97	97	1	2	2	3	5	5	2	1	4	7	5	7	3	1	3	2
337	1	1	1	4	0	3	2	3	2	2	2	1	1	1	4	0	3	2	3	2	2	2	4	2	4	2	1	1	5	1	1	4	2	5	5	2	5	6	7	6	3	1	2	2
338	1	1	1	4	0	3	2	3	2	2	2	1	1	1	4	0	3	2	3	2	2	2	3	4	4	2	1	1	1	1	1	2	2	4	4	2	3	7	4	8	4	3	3	4
339	1	1	1	4	0	3	2	3	2	2	2	1	1	1	4	0	3	2	3	2	2	2	4	4	4	0	0	0	1	1	1	4	3	3	2	1	5	5	5	4	5	1	2	4
340	1	1	1	4	0	3	2	3	2	2	2	1	1	1	4	0	3	2	3	2	2	2	2	4	5	0	0	0	1	1	1	4	4	4	5	5	4	5	5	5	5	1	3	2
341	1	1	1	4	0	3	2	3	2	2	2	1	1	1	4	0	3	2	3	2	2	2	3	4	3	2	1	1	2	1	1	2	2	2	2	1	4	4	4	4	4	2	3	2
342	1	1	1	4	0	3	2	3	2	2	2	1	1	1	4	0	3	2	3	2	2	2	2	2	4	3	1	2	2	3	2	2	4	2	4	3	2	5	3	10	2	2	3	2
343	1	1	1	4	0	3	2	3	2	2	2	1	1	1	4	0	3	2	3	2	2	2	4	3	3	2	97	97	1	1	3	4	2	2	2	1	3	3	2	3	2	2	3	3
344	1	1	1	4	0	3	2	3	2	2	2	1	1	1	4	0	3	2	3	2	2	2	5	1	2	2	1	1	3	2	1	1	3	3	4	1	3	3	5	1	3	2	2	3
345	1	1	1	4	0	3	2	3	2	2	2	1	1	1	4	0	3	2	3	2	2	2	2	4	3	2	1	1	4	1	4	2	1	2	1	1	3	3	3	8	2	2	3	5
346	1	1	1	4	0	3	2	3	2	2	2	1	1	1	4	0	3	2	3	2	2	2	5	4	5	2	1	1	5	1	1	4	4	2	4	4	4	8	6	9	6	2	1	4
347	1	1	1	4	0	3	2	3	2	2	2	1	1	1	4	0	3	2	3	2	2	2	3	3	4	2	1	1	3	2	3	2	4	3	3	2	4	3	3	6	3	2	3	2
348	1	1	1	4	0	3	2	3	2	2	2	1	1	1	4	0	3	2	3	2	2	2	2	2	4	1	97	97	4	1	3	4	4	4	3	1	5	4	4	6	4	3	3	2
349	1	1	1	4	0	3	2	3	2	2	2	1	1	1	4	0	3	2	3	2	2	2	5	4	1	2	1	1	5	1	4	4	1	1	4	1	5	3	4	5	4	2	3	5
350	1	1	1	4	0	3	2	3	2	2	2	1	1	1	4	0	3	2	3	2	2	2	4	4	4	2	1	1	2	2	2	4	2	2	4	2	4	1	1	3	1	3	3	2
351	1	1	1	4	0	3	2	3	2	2	2	1	1	1	4	0	3	2	3	2	2	2	4	2	4	2	1	1	2	1	1	1	4	4	2	2	3	3	3	6	5	2	3	3
352	1	1	1	4	0	3	2	3	2	2	2	1	1	1	4	0	3	2	3	2	2	2	2	4	4	2	97	97	4	1	2	2	3	2	4	1	4	6	4	8	-8	2	3	3
353	1	1	1	4	0	3	2	3	2	2	2	1	1	1	4	0	3	2	3	2	2	2	3	4	4	2	1	1	3	3	1	2	3	3	2	2	3	5	3	8	4	3	1	3
354	1	1	1	4	0	3	2	3	2	2	2	1	1	1	4	0	3	2	3	2	2	2	4	1	4	2	1	1	4	1	1	4	2	4	4	1	4	2	2	4	1	2	3	2
355	1	1	1	4	0	3	2	3	2	2	2	1	1	1	4	0	3	2	3	2	2	2	2	4	3	2	1	1	3	2	3	4	2	3	4	1	3	3	1	5	2	2	3	3
356	1	1	1	4	0	3	2	3	2	2	2	1	1	1	4	0	3	2	3	2	2	2	4	4	3	4	2	2	2	2	1	1	2	2	1	2	2	2	1	1	1	2	2	4
357	1	1	1	4	0	3	2	3	2	2	2	1	1	1	4	0	3	2	3	2	2	2	3	4	4	2	1	1	3	-8	-8	4	2	4	5	4	4	5	6	6	1	2	3	-8
358	1	1	1	4	0	3	2	3	2	2	2	1	1	1	4	0	3	2	3	2	2	2	3	5	5	2	1	1	1	1	1	4	4	4	4	1	5	2	2	2	2	1	2	1
359	1	1	1	4	0	3	2	3	2	2	2	1	1	1	4	0	3	2	3	2	2	2	2	4	4	2	1	1	1	1	3	4	4	3	4	4	5	1	1	1	3	1	3	2
360	1	1	1	4	0	3	2	3	2	2	2	1	1	1	4	0	3	2	3	2	2	2	4	4	5	3	2	1	4	1	1	3	5	2	3	4	4	7	5	7	8	2	2	2
361	1	1	1	4	0	3	2	3	2	2	2	1	1	1	4	0	3	2	3	2	2	2	3	3	4	1	0	1	1	1	1	2	2	2	1	1	2	7	2	8	1	2	3	5
362	1	1	1	4	0	3	2	3	2	2	2	1	1	1	4	0	3	2	3	2	2	2	2	4	4	2	1	1	2	2	1	3	2	4	2	2	4	10	10	10	5	2	2	5
363	1	1	1	4	0	3	2	3	2	2	2	1	1	1	4	0	3	2	3	2	2	2	1	4	5	2	1	1	3	1	3	4	4	4	4	1	4	7	5	8	5	2	3	2
364	1	1	1	4	0	3	2	3	2	2	2	1	1	1	4	0	3	2	3	2	2	2	4	2	3	0	0	0	1	1	1	-8	3	4	4	1	2	4	3	-8	3	2	3	2
365	1	1	1	4	0	3	2	3	2	2	2	1	1	1	4	0	3	2	3	2	2	2	3	2	4	4	2	2	1	1	1	2	4	3	3	3	3	7	5	5	2	1	2	2
366	1	1	1	4	0	3	2	3	2	2	2	1	1	1	4	0	3	2	3	2	2	2	3	2	3	3	1	2	3	3	2	4	4	4	4	3	3	2	6	2	5	2	2	4
367	1	1	1	4	0	3	2	3	2	2	2	1	1	1	4	0	3	2	3	2	2	2	2	3	5	2	1	1	2	1	2	2	2	2	3	1	4	5	3	8	3	2	3	4
368	1	1	1	4	0	3	2	3	2	2	2	1	1	1	4	0	3	2	3	2	2	2	4	2	4	2	97	97	5	1	4	2	3	1	1	1	5	7	1	7	5	2	3	5
369	1	1	1	4	0	3	2	3	2	2	2	1	1	1	4	0	3	2	3	2	2	2	4	3	4	2	1	1	2	1	3	2	4	4	2	2	2	4	2	5	3	2	3	3
370	1	1	1	4	0	3	2	3	2	2	2	1	1	1	4	0	3	2	3	2	2	2	2	4	4	2	1	1	4	1	1	2	5	2	1	1	1	5	3	8	2	2	3	-8
371	1	1	1	4	0	3	2	3	2	2	2	1	1	1	4	0	3	2	3	2	2	2	4	4	5	2	1	1	4	1	1	4	2	4	2	1	5	7	5	8	5	2	1	2
372	1	1	1	4	0	3	2	3	2	2	2	1	1	1	4	0	3	2	3	2	2	2	3	3	5	1	0	1	1	1	1	4	2	2	4	3	4	5	5	5	8	1	2	2
373	1	1	1	4	0	3	2	3	2	2	2	1	1	1	4	0	3	2	3	2	2	2	5	1	4	1	0	1	1	1	1	4	5	5	5	1	5	1	1	2	1	3	3	5
374	1	1	1	4	0	3	2	3	2	2	2	1	1	1	4	0	3	2	3	2	2	2	1	2	4	2	1	1	1	1	1	1	5	2	1	1	5	1	8	-8	7	3	3	4
375	1	1	1	4	0	3	2	3	2	2	2	1	1	1	4	0	3	2	3	2	2	2	4	4	5	2	1	1	1	1	1	2	4	1	1	1	2	5	4	6	5	1	2	4
376	1	1	1	4	0	3	2	3	2	2	2	1	1	1	4	0	3	2	3	2	2	2	4	1	2	1	1	0	3	1	1	4	5	2	5	1	3	3	5	2	5	2	2	4
377	1	1	1	4	0	3	2	3	2	2	2	1	1	1	4	0	3	2	3	2	2	2	5	2	3	2	1	1	1	1	1	4	4	3	3	1	3	2	2	3	2	2	3	2
378	1	1	1	4	0	3	2	3	2	2	2	1	1	1	4	0	3	2	3	2	2	2	3	-8	5	2	1	1	3	1	1	2	5	4	4	1	4	2	2	4	3	2	1	3
379	1	1	1	4	0	3	2	3	2	2	2	1	1	1	4	0	3	2	3	2	2	2	5	4	4	2	1	1	1	1	1	4	4	2	2	1	5	5	7	8	5	2	2	1
380	1	1	1	4	0	3	2	3	2	2	2	1	1	1	4	0	3	2	3	2	2	2	3	3	4	3	1	2	3	3	-8	4	3	2	2	1	5	6	6	5	3	1	1	2
381	1	1	1	4	0	3	2	3	2	2	2	1	1	1	4	0	3	2	3	2	2	2	4	4	4	2	1	1	1	1	1	1	5	5	5	2	1	5	5	6	9	2	3	1
382	1	1	1	4	0	3	2	3	2	2	2	1	1	1	4	0	3	2	3	2	2	2	2	3	4	2	97	97	1	1	1	4	1	1	3	1	3	5	4	6	3	1	2	3
383	1	1	1	4	0	3	2	3	2	2	2	1	1	1	4	0	3	2	3	2	2	2	2	4	5	3	1	2	1	1	1	2	4	2	3	4	5	5	5	5	5	1	3	2
384	1	1	1	4	0	3	2	3	2	2	2	1	1	1	4	0	3	2	3	2	2	2	3	5	5	3	97	97	3	3	1	4	3	2	3	1	5	5	1	7	1	2	3	3
385	1	1	1	4	0	3	2	3	2	2	2	1	1	1	4	0	3	2	3	2	2	2	4	2	4	2	1	1	2	2	2	4	2	2	5	5	5	7	6	8	5	2	2	3
386	1	1	1	4	0	3	2	3	2	2	2	1	1	1	4	0	3	2	3	2	2	2	2	2	5	2	1	1	4	1	2	2	2	1	1	1	5	1	1	5	5	2	3	1
387	1	1	1	4	0	3	2	3	2	2	2	1	1	1	4	0	3	2	3	2	2	2	2	4	4	2	1	1	1	1	1	4	4	2	1	1	5	3	5	8	1	1	3	2
388	1	1	1	4	0	3	2	3	2	2	2	1	1	1	4	0	3	2	3	2	2	2	2	2	4	0	0	0	1	1	1	2	1	1	2	1	1	7	2	5	1	1	2	4
389	1	1	1	4	0	3	2	3	2	2	2	1	1	1	4	0	3	2	3	2	2	2	4	3	5	2	1	1	1	1	1	2	5	1	5	3	5	5	5	5	2	1	2	2
390	1	1	1	4	0	3	2	3	2	2	2	1	1	1	4	0	3	2	3	2	2	2	5	1	4	1	0	1	5	2	1	2	5	4	5	1	2	6	6	5	5	2	3	1
391	1	1	1	4	0	3	2	3	2	2	2	1	1	1	4	0	3	2	3	2	2	2	2	1	4	2	1	1	1	1	1	4	2	2	2	1	5	4	4	4	1	2	3	5
392	1	1	1	4	0	3	2	3	2	2	2	1	1	1	4	0	3	2	3	2	2	2	5	4	4	4	2	2	3	1	1	4	3	4	3	4	4	5	6	5	5	2	1	3
393	1	1	1	4	0	3	2	3	2	2	2	1	1	1	4	0	3	2	3	2	2	2	3	4	4	2	1	1	2	1	1	2	4	3	2	1	4	3	1	5	3	3	3	2
394	1	1	1	4	0	3	2	3	2	2	2	1	1	1	4	0	3	2	3	2	2	2	2	4	2	2	1	1	4	1	1	4	1	3	1	1	5	1	1	3	5	2	3	4
395	1	1	1	4	0	3	2	3	2	2	2	1	1	1	4	0	3	2	3	2	2	2	2	5	5	6	4	2	1	1	1	1	5	4	3	2	4	5	3	7	4	2	3	3
396	1	1	1	4	0	3	2	3	2	2	2	1	1	1	4	0	3	2	3	2	2	2	4	2	4	2	1	1	1	1	1	1	2	1	2	1	4	2	3	2	3	1	2	1
397	1	1	1	4	0	3	2	3	2	2	2	1	1	1	4	0	3	2	3	2	2	2	2	4	4	2	1	1	1	1	1	4	2	3	2	1	3	6	6	-8	6	1	2	2
398	1	1	1	4	0	3	2	3	2	2	2	1	1	1	4	0	3	2	3	2	2	2	2	4	4	2	0	2	3	1	3	2	5	4	2	1	5	5	5	8	5	1	1	5
399	1	1	1	4	0	3	2	3	2	2	2	1	1	1	4	0	3	2	3	2	2	2	1	4	4	1	0	1	2	1	1	1	1	1	1	1	1	7	5	7	4	2	1	2
400	1	1	1	4	0	3	2	3	2	2	2	1	1	1	4	0	3	2	3	2	2	2	2	2	4	1	1	0	2	1	3	4	2	2	5	2	4	6	4	6	6	1	1	4
401	1	1	1	4	0	3	2	3	2	2	2	1	1	1	4	0	3	2	3	2	2	2	2	4	4	2	1	1	2	1	3	4	4	2	3	2	4	6	-8	8	8	2	1	4
402	1	1	1	4	0	3	2	3	2	2	2	1	1	1	4	0	3	2	3	2	2	2	4	3	5	2	2	0	1	1	1	2	5	5	5	5	5	5	2	5	2	3	3	1
403	1	1	1	4	0	3	2	3	2	2	2	1	1	1	4	0	3	2	3	2	2	2	2	3	3	2	1	1	3	3	1	1	1	1	2	1	4	5	5	4	4	2	1	2
404	1	1	1	4	0	3	2	3	2	2	2	1	1	1	4	0	3	2	3	2	2	2	4	2	3	2	97	97	3	3	3	4	1	1	5	2	4	1	2	-8	3	1	2	3
405	1	1	1	4	0	3	2	3	2	2	2	1	1	1	4	0	3	2	3	2	2	2	4	2	3	2	1	1	1	1	1	2	2	1	2	1	5	1	1	3	5	1	3	2
406	1	1	1	4	0	3	2	3	2	2	2	1	1	1	4	0	3	2	3	2	2	2	4	4	4	2	1	1	1	1	1	4	3	3	2	2	4	6	6	4	5	2	1	4
407	1	1	1	4	0	3	2	3	2	2	2	1	1	1	4	0	3	2	3	2	2	2	2	4	4	2	1	1	3	1	3	4	4	2	3	2	5	5	5	5	5	1	3	3
408	1	1	1	4	0	3	2	3	2	2	2	1	1	1	4	0	3	2	3	2	2	2	3	3	2	2	1	1	1	1	1	4	2	2	2	2	4	1	7	1	4	2	1	2
409	1	1	1	4	0	3	2	3	2	2	2	1	1	1	4	0	3	2	3	2	2	2	4	1	5	2	1	1	1	1	1	2	2	2	4	1	5	7	7	7	3	1	2	1
410	1	1	1	4	0	3	2	3	2	2	2	1	1	1	4	0	3	2	3	2	2	2	4	4	4	1	1	0	2	2	2	3	3	4	4	3	4	5	5	5	5	1	1	2
411	1	1	1	4	0	3	2	3	2	2	2	1	1	1	4	0	3	2	3	2	2	2	4	3	5	4	1	3	1	1	1	4	5	1	3	1	5	5	5	5	1	1	2	1
412	1	1	1	4	0	3	2	3	2	2	2	1	1	1	4	0	3	2	3	2	2	2	4	4	5	2	1	1	1	1	5	2	4	4	4	-8	4	-8	-8	-8	-8	1	2	1
413	1	1	1	4	0	3	2	3	2	2	2	1	1	1	4	0	3	2	3	2	2	2	3	4	4	2	1	1	3	1	1	4	2	2	2	1	5	8	5	9	6	1	1	2
414	1	1	1	4	0	3	2	3	2	2	2	1	1	1	4	0	3	2	3	2	2	2	1	3	5	2	97	97	4	1	1	2	2	2	4	1	2	3	1	5	1	3	1	2
415	1	1	1	4	0	3	2	3	2	2	2	1	1	1	4	0	3	2	3	2	2	2	2	3	5	2	1	1	1	1	1	3	1	1	4	2	5	3	3	3	4	1	2	1
416	1	1	1	4	0	3	2	3	2	2	2	1	1	1	4	0	3	2	3	2	2	2	2	2	4	97	97	97	1	1	1	1	4	2	2	2	2	7	5	7	4	1	1	2
417	1	1	1	4	0	3	2	3	2	2	2	1	1	1	4	0	3	2	3	2	2	2	5	4	3	1	1	0	1	1	1	2	4	4	2	4	5	5	5	5	5	2	3	2
418	1	1	1	4	0	3	2	3	1	2	2	1	1	1	4	0	3	2	3	1	2	2	4	4	4	2	1	1	3	1	1	1	3	1	5	2	3	5	6	4	6	1	2	1
419	1	1	1	4	0	3	2	3	1	2	2	1	1	1	4	0	3	2	3	1	2	2	2	4	5	1	1	0	3	1	1	2	1	4	4	1	5	5	5	5	5	1	1	1
420	1	1	1	4	0	3	2	3	1	2	2	1	1	1	4	0	3	2	3	1	2	2	5	2	4	2	1	1	3	1	1	2	5	5	5	4	5	5	5	7	4	3	3	2
421	1	1	1	4	0	3	2	3	1	2	2	1	1	1	4	0	3	2	3	1	2	2	5	4	4	2	1	1	4	5	4	4	2	4	2	2	5	6	6	5	4	2	1	3
422	1	1	1	4	0	3	2	3	1	2	2	1	1	1	4	0	3	2	3	1	2	2	1	4	3	3	97	97	5	2	3	1	1	4	1	1	2	3	2	4	2	3	3	4
423	1	1	1	4	0	3	2	3	1	2	2	1	1	1	4	0	3	2	3	1	2	2	2	4	5	2	97	97	1	1	1	4	4	2	4	1	5	5	5	3	5	3	2	4
424	1	1	1	4	0	3	2	3	1	2	2	1	1	1	4	0	3	2	3	1	2	2	3	3	4	2	1	1	3	1	1	4	5	5	4	-8	5	7	4	8	4	3	3	1
425	1	1	1	4	0	3	2	3	1	2	2	1	1	1	4	0	3	2	3	1	2	2	4	4	5	2	97	97	3	1	1	3	3	2	3	1	4	3	3	3	1	2	1	2
426	1	1	1	4	0	3	2	3	1	2	2	1	1	1	4	0	3	2	3	1	2	2	3	4	4	1	97	97	1	1	1	2	2	4	4	2	4	4	2	6	4	2	1	2
427	1	1	1	4	0	3	2	3	1	2	2	1	1	1	4	0	3	2	3	1	2	2	3	4	5	2	1	1	1	1	-8	4	4	2	4	2	4	7	4	7	1	2	3	2
428	1	1	1	4	0	3	2	3	1	2	2	1	1	1	4	0	3	2	3	1	2	2	4	2	5	1	0	1	1	1	1	1	4	4	3	4	5	5	5	5	5	1	2	1
429	1	1	1	4	0	3	2	3	1	2	2	1	1	1	4	0	3	2	3	1	2	2	2	2	4	97	97	97	2	1	1	2	4	2	5	4	4	6	6	6	6	1	1	3
430	1	1	1	4	0	3	2	3	1	2	1	1	1	1	4	0	3	2	3	1	2	1	4	4	4	2	2	0	1	1	1	4	4	4	2	2	5	5	5	5	2	3	2	2
431	1	1	1	4	0	3	2	3	1	2	1	1	1	1	4	0	3	2	3	1	2	1	4	4	5	1	1	0	3	1	1	2	4	2	2	1	5	5	5	5	5	1	3	4
432	1	1	0	4	0	3	2	3	1	2	1	1	1	0	4	0	3	2	3	1	2	1	5	2	5	0	0	0	1	1	2	4	1	1	1	1	5	7	5	8	9	1	2	1
433	1	1	0	4	0	3	2	3	1	2	1	1	1	0	4	0	3	2	3	1	2	1	1	4	4	0	0	0	1	1	1	2	2	3	3	2	4	-8	-8	-8	-8	2	3	3
434	1	1	0	4	0	3	2	3	1	2	1	1	1	0	4	0	3	2	3	1	2	1	3	4	5	2	0	2	1	1	1	4	2	1	1	1	5	5	4	6	1	1	1	1
435	1	1	0	4	0	3	2	3	1	2	1	1	1	0	4	0	3	2	3	1	2	1	4	2	4	1	1	0	1	1	1	2	4	4	4	2	4	5	4	7	3	1	1	3
436	1	1	0	4	0	3	2	3	1	2	1	1	1	0	4	0	3	2	3	1	2	1	3	5	4	5	4	1	1	1	1	2	3	3	3	3	3	6	6	-8	2	2	3	2
437	1	1	0	4	0	3	2	3	1	2	1	1	1	0	4	0	3	2	3	1	2	1	4	2	4	2	1	1	2	2	1	4	4	4	2	2	4	8	7	9	8	2	3	4
438	1	1	0	4	0	3	2	3	1	2	1	1	1	0	4	0	3	2	3	1	2	1	4	4	4	2	1	1	1	1	1	4	4	1	1	1	5	6	6	3	1	2	2	2
439	1	1	0	4	0	3	2	3	1	2	1	1	1	0	4	0	3	2	3	1	2	1	3	4	4	2	1	1	3	1	1	2	4	2	4	2	5	6	6	6	3	2	1	4
440	1	1	0	4	0	3	2	3	1	2	1	1	1	0	4	0	3	2	3	1	2	1	4	2	4	2	1	1	3	1	1	4	4	2	2	4	4	4	4	5	4	2	1	2
441	1	1	0	4	0	3	2	3	1	2	1	1	1	0	4	0	3	2	3	1	2	1	4	3	4	2	1	1	1	1	1	2	4	4	4	4	5	3	2	1	1	2	3	2
442	1	1	0	4	0	3	2	3	1	2	1	1	1	0	4	0	3	2	3	1	2	1	3	4	3	2	1	1	3	3	3	4	2	3	3	2	3	7	7	6	6	2	3	1
443	1	1	0	4	0	3	2	3	1	2	1	1	1	0	4	0	3	2	3	1	2	1	5	3	5	2	1	1	-8	1	1	2	2	5	4	4	5	5	2	7	1	2	2	1
444	1	1	0	4	0	3	2	3	1	2	1	1	1	0	4	0	3	2	3	1	2	1	4	2	5	2	1	1	2	1	2	4	4	4	4	2	4	8	5	8	5	2	1	1
445	1	1	0	4	0	3	2	3	1	2	1	1	1	0	4	0	3	2	3	1	2	1	4	2	3	2	2	0	1	1	1	4	4	5	1	4	3	6	6	6	5	2	1	5
446	1	1	0	4	0	3	2	3	1	2	1	1	1	0	4	0	3	2	3	1	2	1	4	4	4	2	1	1	4	2	1	1	4	3	4	4	3	5	4	8	8	1	3	1
447	1	1	0	4	0	3	2	3	1	2	1	1	1	0	4	0	3	2	3	1	2	1	4	2	4	2	1	1	2	1	3	4	4	2	3	2	2	5	5	5	4	2	1	3
448	1	1	0	4	0	3	2	3	1	2	1	1	1	0	4	0	3	2	3	1	2	1	2	2	4	2	1	1	1	1	1	1	2	1	2	1	5	4	5	2	4	2	1	5
449	1	1	0	4	0	3	2	3	1	2	1	1	1	0	4	0	3	2	3	1	2	1	2	1	4	2	1	1	3	1	3	4	1	1	3	1	5	3	1	5	3	-8	3	3
450	1	1	0	4	0	3	2	3	1	2	1	1	1	0	4	0	3	2	3	1	2	1	3	3	3	1	97	97	1	1	1	4	2	4	1	1	5	5	5	6	5	1	1	3
451	1	1	0	4	0	3	2	3	1	2	1	1	1	0	4	0	3	2	3	1	2	1	2	2	4	1	97	97	3	3	3	2	2	2	2	2	4	3	1	7	1	2	3	1
452	1	1	0	4	0	3	2	3	1	2	1	1	1	0	4	0	3	2	3	1	2	1	4	4	4	2	1	1	3	1	2	2	4	2	1	1	3	6	3	7	1	2	1	4
453	1	1	0	4	0	3	2	3	1	2	1	1	1	0	4	0	3	2	3	1	2	1	1	4	5	5	3	2	1	1	1	2	5	5	4	2	5	5	5	5	2	2	3	3
454	1	1	0	4	0	3	2	3	1	2	1	1	1	0	4	0	3	2	3	1	2	1	3	2	4	2	1	1	5	1	4	4	1	1	2	1	5	5	5	7	5	2	3	4
455	1	1	0	4	0	3	2	3	1	2	1	1	1	0	4	0	3	2	3	1	2	1	4	2	4	2	97	97	1	1	1	3	4	1	1	1	1	5	7	6	6	2	3	3
456	1	1	0	4	0	3	2	3	1	2	1	1	1	0	4	0	3	2	3	1	2	1	3	4	5	2	1	1	3	1	3	4	2	1	1	1	5	5	3	8	3	3	3	2
457	1	1	0	4	0	3	2	3	1	2	1	1	1	0	4	0	3	2	3	1	2	1	3	4	5	2	1	1	1	1	1	4	3	2	2	1	4	4	3	5	2	2	1	2
458	1	1	0	4	0	3	2	3	1	2	1	1	1	0	4	0	3	2	3	1	2	1	4	1	5	3	2	1	3	1	3	2	5	3	5	1	5	3	1	10	1	2	3	1
459	1	1	0	4	0	3	2	3	1	2	1	1	1	0	4	0	3	2	3	1	2	1	4	2	3	2	97	97	2	1	1	1	2	2	4	2	2	3	4	3	4	2	2	1
460	1	1	0	4	0	3	2	3	1	2	1	1	1	0	4	0	3	2	3	1	2	1	3	4	5	2	1	1	2	1	1	3	1	5	1	1	3	3	3	5	2	1	2	2
461	1	1	0	4	0	3	3	3	1	2	1	1	1	0	4	0	3	3	3	1	2	1	4	2	4	2	1	1	3	1	1	2	4	2	4	2	5	5	3	10	7	1	3	4
462	1	1	0	4	0	3	3	3	1	2	1	1	1	0	4	0	3	3	3	1	2	1	2	2	4	1	1	0	5	1	1	4	2	4	2	2	5	1	5	5	3	3	2	2
463	1	1	0	4	0	3	3	3	1	2	1	1	1	0	4	0	3	3	3	1	2	1	4	4	4	2	1	1	4	2	1	4	2	3	2	3	3	4	3	5	2	1	1	4
464	1	1	0	4	0	3	3	3	1	2	1	1	1	0	4	0	3	3	3	1	2	1	2	4	4	3	1	2	1	1	1	3	4	4	2	1	5	1	4	1	1	1	2	1
465	1	1	0	4	0	3	3	3	1	2	1	1	1	0	4	0	3	3	3	1	2	1	3	4	3	1	97	97	3	3	3	2	3	2	2	2	5	4	4	4	3	2	3	3
466	1	1	0	4	0	3	3	3	1	2	1	1	1	0	4	0	3	3	3	1	2	1	2	4	5	2	1	1	1	1	1	2	3	3	5	1	2	6	5	7	1	1	2	1
467	1	1	0	4	0	3	3	3	1	2	1	1	1	0	4	0	3	3	3	1	2	1	4	4	4	1	0	1	4	4	1	3	4	1	1	1	1	4	2	4	8	2	1	4
468	1	1	0	4	0	3	3	3	1	2	1	1	1	0	4	0	3	3	3	1	2	1	4	4	4	2	2	0	1	2	1	1	4	4	4	1	4	5	5	5	2	1	1	1
469	1	1	0	4	0	3	3	3	1	2	1	1	1	0	4	0	3	3	3	1	2	1	2	4	4	3	2	1	1	1	1	4	3	4	4	3	3	4	4	4	2	-8	1	4
470	1	1	0	4	0	3	3	3	1	2	1	1	1	0	4	0	3	3	3	1	2	1	4	2	3	2	1	1	1	1	1	4	5	5	5	3	-8	3	4	3	2	2	1	2
471	1	1	0	4	0	3	3	3	1	2	1	1	1	0	4	0	3	3	3	1	2	1	3	2	4	2	97	97	1	1	1	3	4	2	4	2	4	6	5	5	5	1	3	2
472	1	1	0	4	0	3	3	3	1	2	1	1	1	0	4	0	3	3	3	1	2	1	4	2	4	1	0	1	1	3	1	2	2	2	2	1	5	5	2	7	1	3	3	2
473	1	1	0	4	0	3	3	3	1	2	1	1	1	0	4	0	3	3	3	1	2	1	4	1	4	2	1	1	1	1	1	3	5	2	4	2	5	4	4	4	1	2	2	-8
474	1	1	0	4	0	3	3	3	1	2	1	1	1	0	4	0	3	3	3	1	2	1	2	4	4	4	2	2	1	1	1	2	4	2	1	1	4	5	5	5	3	1	2	1
475	1	1	0	4	0	3	3	3	1	2	1	1	1	0	4	0	3	3	3	1	2	1	3	4	4	1	0	1	1	1	1	3	4	2	1	1	4	5	5	5	2	1	2	1
476	1	1	0	4	0	3	3	3	1	2	1	1	1	0	4	0	3	3	3	1	2	1	4	4	5	2	1	1	3	3	1	2	2	3	1	1	5	6	5	6	3	1	3	1
477	1	1	0	4	0	3	3	3	1	2	1	1	1	0	4	0	3	3	3	1	2	1	4	4	5	2	1	1	4	1	3	4	1	1	1	1	5	4	3	7	3	1	1	5
478	1	1	0	4	0	3	3	3	1	2	1	1	1	0	4	0	3	3	3	1	2	1	1	4	4	3	1	2	1	1	1	4	1	1	2	1	3	2	2	2	1	1	3	2
479	1	1	0	4	0	3	3	3	1	2	1	1	1	0	4	0	3	3	3	1	2	1	4	3	5	2	1	1	1	1	3	4	4	3	4	3	4	5	4	6	2	1	3	2
480	1	1	0	4	0	3	3	3	1	2	1	1	1	0	4	0	3	3	3	1	2	1	4	2	1	2	1	1	4	1	4	1	1	1	5	2	5	1	1	1	1	2	1	4
481	1	1	0	4	0	3	3	3	1	2	1	1	1	0	4	0	3	3	3	1	2	1	4	1	4	3	1	2	1	1	1	2	2	4	5	4	4	1	1	2	1	3	3	5
482	1	1	0	4	0	3	3	3	1	2	1	1	1	0	4	0	3	3	3	1	2	1	4	4	4	2	1	1	2	2	2	1	5	2	2	3	5	6	6	6	5	2	3	4
483	1	1	0	4	0	3	3	3	1	2	1	1	1	0	4	0	3	3	3	1	2	1	4	1	4	1	97	97	2	1	1	2	2	4	4	2	4	1	5	5	1	1	3	4
484	1	1	0	4	0	3	3	3	1	2	1	1	1	0	4	0	3	3	3	1	2	1	4	4	4	2	97	97	1	1	1	2	4	4	2	1	5	4	2	5	1	1	2	1
485	1	1	0	4	0	3	3	3	1	2	1	1	1	0	4	0	3	3	3	1	2	1	3	4	4	2	1	1	1	1	1	4	4	1	2	1	5	6	6	6	3	2	2	1
486	1	1	0	4	0	3	3	3	1	2	1	1	1	0	4	0	3	3	3	1	2	1	4	4	4	1	0	1	1	1	1	4	2	2	2	2	5	6	5	6	2	3	3	1
487	1	1	0	4	0	3	3	3	1	2	1	1	1	0	4	0	3	3	3	1	2	1	2	4	4	2	1	1	4	1	4	4	1	1	1	1	5	6	4	9	7	3	3	2
488	1	1	0	4	0	3	3	3	1	2	1	1	1	0	4	0	3	3	3	1	2	1	2	3	4	1	1	0	5	1	3	2	2	2	4	1	4	5	6	5	5	2	1	2
489	1	1	0	4	0	3	3	3	1	2	1	1	1	0	4	0	3	3	3	1	2	1	4	3	4	2	1	1	3	3	1	2	3	4	4	2	4	4	4	6	4	2	3	3
490	1	1	0	4	0	3	3	3	1	2	1	1	1	0	4	0	3	3	3	1	2	1	3	5	5	7	7	0	1	1	1	2	5	5	5	5	5	5	5	5	1	2	2	3
491	1	1	0	4	0	3	3	3	1	2	1	1	1	0	4	0	3	3	3	1	2	1	3	3	4	2	97	97	1	1	1	1	2	4	2	1	5	4	2	5	3	2	2	2
492	1	1	0	4	0	3	3	3	1	2	1	1	1	0	4	0	3	3	3	1	2	1	4	2	4	3	1	2	1	1	3	4	1	1	1	1	5	1	1	1	1	2	3	2
493	1	1	0	4	0	3	3	3	1	2	1	1	1	0	4	0	3	3	3	1	2	1	2	4	4	1	0	1	2	2	2	4	2	2	2	2	2	1	1	1	1	3	2	2
494	1	1	0	4	0	3	3	3	1	2	1	1	1	0	4	0	3	3	3	1	2	1	3	4	4	2	2	0	4	1	1	4	1	1	2	1	4	8	5	3	3	2	2	4
495	1	1	0	4	0	3	3	3	1	2	1	1	1	0	4	0	3	3	3	1	2	1	2	4	4	2	1	1	2	1	1	4	4	2	2	2	4	5	2	8	2	2	3	2
496	1	1	0	4	0	3	3	3	1	2	1	1	1	0	4	0	3	3	3	1	2	1	3	3	4	-2	97	97	4	4	4	3	2	2	3	1	4	5	5	6	5	3	3	4
497	1	1	0	4	0	3	3	3	1	2	1	1	1	0	4	0	3	3	3	1	2	1	4	4	4	2	1	1	1	1	1	4	4	-8	3	-8	4	5	2	5	1	1	-8	1
498	1	1	0	4	0	3	3	3	1	2	1	1	1	0	4	0	3	3	3	1	2	1	2	4	4	1	97	97	1	1	1	2	4	4	2	2	4	8	7	9	9	1	2	2
499	1	1	0	4	0	3	3	3	1	2	1	1	1	0	4	0	3	3	3	1	2	1	4	2	4	2	1	1	1	1	2	1	2	2	2	1	5	5	5	5	5	2	3	2
500	1	1	0	4	0	3	3	3	1	2	1	1	1	0	4	0	3	3	3	1	2	1	2	2	3	1	1	0	2	1	3	1	4	3	2	2	4	4	7	6	8	1	1	4
501	1	1	0	4	0	3	3	3	1	2	1	1	1	0	4	0	3	3	3	1	2	1	3	2	3	1	0	1	5	1	1	2	4	2	4	3	5	1	5	5	5	1	1	3
502	1	1	0	4	0	3	3	3	1	2	1	1	1	0	4	0	3	3	3	1	2	1	1	4	4	1	0	1	1	1	1	2	5	4	2	4	4	1	1	10	1	2	3	-8
503	1	1	0	4	0	3	3	3	1	2	1	1	1	0	4	0	3	3	3	1	2	1	3	4	4	2	1	1	2	2	1	2	2	2	2	2	4	4	2	6	3	2	3	-8
504	1	1	0	4	0	3	3	2	1	2	1	1	1	0	4	0	3	3	2	1	2	1	2	1	5	2	1	1	5	5	5	3	5	4	4	5	5	5	5	5	5	1	2	5
505	1	1	0	4	0	3	3	2	1	2	1	1	1	0	4	0	3	3	2	1	2	1	2	4	4	2	1	1	5	1	1	2	2	4	4	2	4	5	5	5	1	1	3	4
506	1	1	0	4	0	3	3	2	1	2	1	1	1	0	4	0	3	3	2	1	2	1	3	4	5	1	97	97	2	2	2	2	5	3	5	4	4	5	5	5	9	2	2	4
507	1	1	0	4	0	3	3	2	1	2	1	1	1	0	4	0	3	3	2	1	2	1	4	1	5	1	0	1	3	1	1	4	4	5	5	1	5	5	5	7	5	2	3	1
508	1	1	0	4	0	3	3	2	1	2	1	1	1	0	4	0	3	3	2	1	2	1	4	3	3	97	97	97	1	1	1	1	2	2	4	2	5	1	2	1	5	1	2	4
509	1	1	0	4	0	3	3	2	1	2	1	1	1	0	4	0	3	3	2	1	2	1	4	2	4	2	97	97	3	2	3	4	2	2	4	2	4	5	5	8	3	2	2	4
510	1	1	0	4	0	3	3	2	1	2	1	1	1	0	4	0	3	3	2	1	2	1	2	3	4	2	1	1	-8	-8	-8	2	2	2	2	2	4	3	1	4	1	2	3	3
511	1	1	0	4	0	3	3	2	1	2	0	1	1	0	4	0	3	3	2	1	2	0	-8	-8	5	1	97	97	1	1	-8	4	-8	-8	-8	-8	-8	10	10	10	10	2	3	-8
512	1	1	0	4	0	3	3	2	1	2	0	1	1	0	4	0	3	3	2	1	2	0	4	2	4	2	1	1	1	1	1	4	4	2	4	2	2	3	4	3	2	1	2	3
513	1	1	0	4	0	3	3	2	1	2	0	1	1	0	4	0	3	3	2	1	2	0	1	3	5	2	1	1	1	1	1	2	4	2	2	2	5	2	2	2	2	1	2	1
514	1	1	0	4	0	3	3	2	1	2	0	1	1	0	4	0	3	3	2	1	2	0	2	4	4	2	0	2	4	2	3	2	2	2	2	2	5	5	3	7	3	1	3	2
515	1	1	0	4	0	3	3	2	1	2	0	1	1	0	4	0	3	3	2	1	2	0	2	5	5	4	1	3	1	1	1	2	5	1	1	1	5	6	5	8	3	3	3	1
516	1	1	0	4	0	3	3	2	1	2	0	1	1	0	4	0	3	3	2	1	2	0	3	1	2	2	1	1	3	3	3	1	3	2	3	2	3	1	1	1	5	1	1	4
517	1	1	0	4	0	3	3	2	1	2	0	1	1	0	4	0	3	3	2	1	2	0	4	4	4	2	1	1	1	1	1	4	4	4	2	1	3	1	1	1	1	2	3	2
518	1	1	0	4	0	3	3	2	1	2	0	1	1	0	4	0	3	3	2	1	2	0	2	4	4	2	1	1	4	2	3	4	2	2	4	1	4	5	3	8	4	2	3	2
519	1	1	0	4	0	3	3	2	1	2	0	1	1	0	4	0	3	3	2	1	2	0	3	4	4	1	1	0	1	1	1	4	2	2	3	1	4	3	2	4	1	1	3	4
520	1	1	0	4	0	3	3	2	1	2	0	1	1	0	4	0	3	3	2	1	2	0	3	4	5	2	0	2	5	3	1	4	2	1	1	1	3	5	3	8	8	1	1	1
521	1	1	0	4	0	3	3	2	1	2	0	1	1	0	4	0	3	3	2	1	2	0	4	4	4	2	1	1	5	1	5	4	4	2	4	2	4	6	2	8	5	2	1	4
522	1	1	0	4	0	3	3	2	1	2	0	1	1	0	4	0	3	3	2	1	2	0	4	2	3	2	1	1	1	1	1	1	2	2	2	2	3	6	4	10	3	1	-8	2
592	1	1	0	4	0	3	3	2	1	2	0	1	1	0	4	0	3	3	2	1	2	0	2	4	4	3	2	1	1	1	1	4	2	3	3	2	4	5	4	6	3	1	2	3
593	1	1	0	4	0	3	3	2	1	2	0	1	1	0	4	0	3	3	2	1	2	0	3	3	4	1	0	1	2	1	2	1	4	4	4	2	3	1	1	1	1	1	3	3
594	1	1	0	4	0	3	3	2	0	2	0	1	1	0	4	0	3	3	2	0	2	0	4	3	4	1	1	0	1	1	1	2	4	4	3	-8	4	6	4	7	3	1	3	4
595	1	1	0	4	0	3	3	2	0	2	0	1	1	0	4	0	3	3	2	0	2	0	5	3	5	2	1	1	1	1	1	3	1	1	1	1	5	6	6	6	4	2	2	2
596	1	1	0	4	0	3	3	2	0	2	0	1	1	0	4	0	3	3	2	0	2	0	2	4	4	2	1	1	1	1	1	4	4	4	3	4	4	6	5	7	4	1	2	3
597	1	1	0	4	0	3	3	2	0	2	0	1	1	0	4	0	3	3	2	0	2	0	3	1	5	3	2	1	1	1	1	3	2	2	3	2	3	4	4	4	4	2	2	4
598	1	1	0	4	0	3	3	2	0	2	0	1	1	0	4	0	3	3	2	0	2	0	3	4	4	1	0	1	3	1	1	4	4	4	4	4	4	5	4	6	4	1	1	4
599	1	1	0	4	0	3	3	2	0	2	0	1	1	0	4	0	3	3	2	0	2	0	2	4	5	2	1	1	3	3	3	3	4	3	4	2	4	5	4	7	2	2	2	1
600	1	1	0	4	0	3	3	2	0	2	0	1	1	0	4	0	3	3	2	0	2	0	3	3	4	1	0	1	1	1	1	4	3	3	4	3	4	4	3	4	2	2	3	3
601	1	1	0	4	0	3	3	2	0	2	0	1	1	0	4	0	3	3	2	0	2	0	4	2	4	2	1	1	4	1	3	4	4	4	3	4	3	1	1	1	4	2	3	5
602	1	1	0	4	0	3	3	2	0	2	0	1	1	0	4	0	3	3	2	0	2	0	2	4	5	2	1	1	3	1	3	2	2	2	2	1	4	6	4	7	5	2	3	4
603	1	1	0	4	0	3	3	2	0	2	0	1	1	0	4	0	3	3	2	0	2	0	5	2	1	1	97	97	1	1	1	2	5	5	5	1	5	2	2	2	4	2	2	2
604	1	1	0	4	0	3	3	2	0	2	0	1	1	0	4	0	3	3	2	0	2	0	3	3	4	1	97	97	1	1	1	4	1	1	1	1	4	10	9	10	10	1	3	3
605	1	1	0	4	0	3	3	2	0	2	0	1	1	0	4	0	3	3	2	0	2	0	2	3	5	1	0	1	1	1	1	1	2	2	3	2	4	4	4	4	3	1	2	3
606	1	1	0	4	0	3	3	2	0	2	0	1	1	0	4	0	3	3	2	0	2	0	4	4	4	2	1	1	2	1	1	4	4	2	3	2	4	5	4	6	1	2	2	2
607	1	1	0	4	0	3	3	2	0	2	0	1	1	0	4	0	3	3	2	0	2	0	-8	3	4	3	1	2	-8	-8	-8	4	-8	-8	-8	-8	-8	2	-8	-8	-8	2	3	-8
608	1	1	0	4	0	3	3	2	0	2	0	1	1	0	4	0	3	3	2	0	2	0	4	4	4	2	1	1	1	1	1	4	4	2	4	4	4	5	3	5	3	2	3	2
609	1	1	0	4	0	3	3	2	0	2	0	1	1	0	4	0	3	3	2	0	2	0	2	4	4	2	1	1	1	1	1	4	4	4	3	4	4	5	4	6	3	2	3	3
610	1	1	0	4	0	3	3	2	0	2	0	1	1	0	4	0	3	3	2	0	2	0	3	3	4	2	1	1	1	1	1	2	3	3	3	3	3	3	2	3	2	2	3	2
611	1	1	0	4	0	3	3	2	0	2	0	1	1	0	4	0	3	3	2	0	2	0	2	4	5	2	1	1	3	1	3	2	4	4	4	3	3	1	1	1	4	2	3	5
612	1	1	0	4	0	3	3	2	0	2	0	1	1	0	4	0	3	3	2	0	2	0	4	2	4	2	1	1	1	1	1	4	4	4	4	2	4	1	1	3	1	2	3	2
613	1	1	0	4	0	3	3	2	0	2	0	1	1	0	4	0	3	3	2	0	2	0	4	2	4	2	1	1	3	1	3	4	2	2	2	1	4	3	4	7	-8	2	3	4
614	1	1	0	4	0	3	3	2	0	2	0	1	1	0	4	0	3	3	2	0	2	0	3	4	4	2	1	1	1	1	1	2	4	2	4	2	4	5	5	5	5	1	2	2
615	1	1	0	4	0	3	3	2	0	2	0	1	1	0	4	0	3	3	2	0	2	0	2	4	4	2	1	1	1	1	1	4	4	4	3	3	4	5	4	6	3	2	3	3
616	1	1	0	4	0	3	3	2	0	2	0	1	1	0	4	0	3	3	2	0	2	0	4	3	4	2	1	1	3	1	1	4	4	4	4	3	4	5	2	7	2	2	3	4
617	1	1	0	4	0	3	3	2	0	2	0	1	1	0	4	0	3	3	2	0	2	0	2	4	4	2	1	1	2	1	1	1	4	4	4	4	4	5	2	6	1	2	2	4
618	1	1	0	4	0	3	3	2	0	2	0	1	1	0	4	0	3	3	2	0	2	0	4	4	5	1	1	0	2	2	2	1	2	2	2	2	4	6	7	7	1	1	3	4
619	1	1	0	4	0	3	3	2	0	2	0	1	1	0	4	0	3	3	2	0	2	0	4	4	4	2	1	1	2	2	2	4	2	2	2	2	2	5	5	7	6	2	3	4
620	1	1	0	4	0	3	3	2	0	2	0	1	1	0	4	0	3	3	2	0	2	0	2	2	4	4	2	2	1	1	1	4	4	4	3	4	4	5	4	6	3	2	3	3
621	1	1	0	4	0	3	3	2	0	2	0	1	1	0	4	0	3	3	2	0	2	0	4	3	3	1	0	1	3	1	1	4	3	3	3	2	4	1	1	1	1	2	3	3
622	1	1	0	4	0	3	3	2	0	2	0	1	1	0	4	0	3	3	2	0	2	0	2	4	4	2	1	1	1	1	1	4	2	2	2	2	4	5	5	5	2	1	2	2
623	1	1	0	4	0	3	3	2	0	2	0	1	1	0	4	0	3	3	2	0	2	0	4	2	3	0	0	0	1	1	1	4	1	1	4	1	5	1	1	1	1	2	3	2
624	1	1	0	4	0	3	3	2	0	2	0	1	1	0	4	0	3	3	2	0	2	0	3	4	4	2	1	1	1	1	1	1	3	3	3	2	4	4	1	5	1	1	3	3
625	1	1	0	4	0	3	3	2	0	2	0	1	1	0	4	0	3	3	2	0	2	0	3	4	5	3	97	97	1	1	3	2	2	2	4	1	4	4	3	4	2	2	1	3
626	1	1	0	4	0	3	3	2	0	2	0	1	1	0	4	0	3	3	2	0	2	0	4	2	4	1	1	0	1	1	1	3	4	4	3	3	3	5	5	5	4	2	1	4
627	1	1	0	4	0	3	3	2	0	2	0	1	1	0	4	0	3	3	2	0	2	0	4	3	4	4	2	2	2	1	1	4	2	2	3	2	4	7	7	8	5	1	2	3
628	1	1	0	4	0	3	3	2	0	2	0	1	1	0	4	0	3	3	2	0	2	0	2	4	4	1	1	0	1	1	1	4	4	4	3	2	4	6	5	7	4	2	3	3
629	1	1	0	4	0	3	3	2	0	2	0	1	1	0	4	0	3	3	2	0	2	0	2	4	4	1	97	97	5	2	4	4	1	1	2	1	3	7	5	8	3	2	3	3
630	1	1	0	4	0	3	3	2	0	2	0	1	1	0	4	0	3	3	2	0	2	0	2	4	4	2	1	1	1	1	1	4	4	4	4	2	4	4	6	4	4	1	2	2
631	1	1	0	4	0	3	3	2	0	2	0	1	1	0	4	0	3	3	2	0	2	0	2	2	4	1	0	1	2	1	2	1	4	4	4	4	4	1	4	1	6	2	1	2
632	1	1	0	4	0	3	3	2	0	2	0	1	1	0	4	0	3	3	2	0	2	0	2	3	4	2	1	1	2	1	2	3	4	2	4	2	4	6	5	6	4	1	2	2
633	1	1	0	4	0	3	3	2	0	2	0	1	1	0	4	0	3	3	2	0	2	0	3	2	4	2	1	1	2	1	1	2	4	3	3	1	4	5	4	6	3	1	1	4
689	1	1	0	4	0	3	3	2	0	2	0	1	1	0	4	0	3	3	2	0	2	0	2	4	4	3	2	1	1	1	1	4	4	4	3	3	4	4	3	5	2	2	2	3
690	1	1	0	4	0	3	3	2	0	2	0	1	1	0	4	0	3	3	2	0	2	0	4	3	4	1	0	1	4	1	5	4	2	4	4	1	3	1	1	10	5	2	3	5
691	1	1	0	4	0	3	3	2	0	2	0	1	1	0	4	0	3	3	2	0	2	0	4	2	3	1	0	1	1	1	1	1	2	2	2	2	4	3	3	3	2	2	3	5
692	1	1	0	4	0	3	3	2	0	2	0	1	1	0	4	0	3	3	2	0	2	0	3	4	5	2	1	1	4	1	-8	2	4	2	1	1	5	4	3	8	3	2	1	2
693	1	1	0	4	0	3	3	2	0	2	0	1	1	0	4	0	3	3	2	0	2	0	4	2	4	1	0	1	2	2	1	4	3	4	4	2	5	5	-8	5	5	2	3	2
694	1	1	0	4	0	3	3	2	0	2	0	1	1	0	4	0	3	3	2	0	2	0	2	4	4	1	0	1	1	1	1	2	2	4	5	2	5	5	7	7	6	2	3	4
695	1	1	0	4	0	3	3	2	0	2	0	1	1	0	4	0	3	3	2	0	2	0	4	4	4	0	0	0	1	1	1	4	4	4	4	4	3	5	5	5	2	2	3	4
696	1	1	0	4	0	3	3	2	0	2	0	1	1	0	4	0	3	3	2	0	2	0	4	3	4	1	97	97	1	1	1	4	3	3	3	2	4	4	4	4	2	1	2	3
697	1	1	0	4	0	3	3	2	0	2	0	1	1	0	4	0	3	3	2	0	2	0	2	2	3	2	0	2	1	1	1	4	4	2	3	2	4	1	1	1	2	2	2	2
698	1	1	0	4	0	3	3	2	0	2	0	1	1	0	4	0	3	3	2	0	2	0	3	4	4	3	2	1	1	1	1	3	2	2	2	2	4	4	4	4	2	2	2	4
699	1	1	0	4	0	3	3	2	0	2	0	1	1	0	4	0	3	3	2	0	2	0	2	3	4	2	1	1	1	1	1	4	4	4	3	2	4	5	4	6	3	2	3	3
700	1	1	0	4	0	3	3	2	0	2	0	1	1	0	4	0	3	3	2	0	2	0	4	3	4	1	1	0	1	2	1	4	2	2	2	2	4	5	7	6	4	1	2	2
701	1	1	0	4	0	3	3	2	0	2	0	1	1	0	4	0	3	3	2	0	2	0	4	2	4	2	1	1	1	1	1	4	4	3	2	2	4	5	4	6	3	2	1	4
702	1	1	0	4	0	3	3	2	0	2	0	1	1	0	4	0	3	3	2	0	2	0	2	4	2	1	1	0	1	1	1	4	3	3	3	3	3	4	4	4	4	2	3	4
703	1	1	0	4	0	3	3	2	0	2	0	1	1	0	4	0	3	3	2	0	2	0	3	4	4	1	0	1	2	2	2	1	4	4	4	2	4	2	2	3	5	1	1	4
704	1	1	0	4	0	3	3	2	0	2	0	1	1	0	4	0	3	3	2	0	2	0	3	2	4	2	1	1	4	1	1	2	2	2	4	2	4	6	8	8	3	2	1	5
705	1	1	0	4	0	3	3	2	0	2	0	1	1	0	4	0	3	3	2	0	2	0	3	4	5	1	0	1	3	1	3	4	3	2	3	2	3	7	6	6	3	2	3	4
706	1	1	0	4	0	3	3	2	0	2	0	1	1	0	4	0	3	3	2	0	2	0	4	2	4	1	0	1	1	1	1	2	2	2	4	2	4	4	4	6	5	2	1	4
707	1	1	0	4	0	3	3	2	0	2	0	1	1	0	4	0	3	3	2	0	2	0	3	4	4	1	0	1	2	1	2	4	4	4	3	2	2	5	5	5	4	2	3	3
708	1	1	0	4	0	3	3	2	0	2	0	1	1	0	4	0	3	3	2	0	2	0	3	2	4	2	1	1	1	1	1	2	2	2	2	2	4	4	3	5	3	2	3	2
709	1	1	0	4	0	3	3	2	0	2	0	1	1	0	4	0	3	3	2	0	2	0	2	5	4	2	1	1	2	1	1	1	4	2	2	4	4	4	3	5	4	2	2	2
710	1	1	0	4	0	3	3	2	0	2	0	1	1	0	4	0	3	3	2	0	2	0	4	4	4	2	1	1	2	1	1	4	4	3	4	2	4	3	4	2	2	2	3	2
711	1	1	0	4	0	3	3	2	0	2	0	1	1	0	4	0	3	3	2	0	2	0	4	4	4	3	2	1	2	1	2	4	2	2	2	2	4	5	5	6	2	1	2	2
712	1	1	0	4	0	3	3	2	0	2	0	1	1	0	4	0	3	3	2	0	2	0	2	4	4	2	1	1	1	1	1	4	4	4	3	4	4	6	5	7	4	2	3	3
713	1	1	0	4	0	3	3	2	0	2	0	1	1	0	4	0	3	3	2	0	2	0	3	3	4	2	1	1	1	1	1	4	4	3	4	2	4	3	2	3	2	2	2	2
714	1	1	0	4	0	3	3	2	0	2	0	1	1	0	4	0	3	3	2	0	2	0	4	4	5	0	0	0	1	1	1	3	5	1	5	5	5	5	4	7	3	2	1	-8
715	1	1	0	4	0	3	3	2	0	2	0	1	1	0	4	0	3	3	2	0	2	0	2	4	4	3	2	1	1	1	1	4	4	4	3	4	4	6	5	7	4	2	3	3
716	1	1	0	4	0	3	3	2	0	2	0	1	1	0	4	0	3	3	2	0	2	0	3	4	4	1	0	1	2	1	1	3	4	4	4	2	3	3	3	3	3	2	3	4
717	1	1	0	4	0	3	3	2	0	2	0	1	1	0	4	0	3	3	2	0	2	0	2	2	4	2	1	1	1	1	1	2	3	2	2	1	4	3	2	4	1	2	3	3
718	1	1	0	4	0	3	3	2	0	2	0	1	1	0	4	0	3	3	2	0	2	0	-8	4	4	1	1	0	1	1	1	2	2	2	4	2	4	6	5	7	1	2	3	3
719	1	1	0	4	0	3	3	2	0	2	0	1	1	0	4	0	3	3	2	0	2	0	2	4	4	2	1	1	1	1	1	4	4	4	3	3	4	7	6	8	5	1	2	3
720	1	1	0	4	0	3	3	2	0	2	0	1	1	0	4	0	3	3	2	0	2	0	4	4	5	3	2	1	2	1	3	3	2	2	1	1	4	7	7	7	6	2	2	2
721	1	1	0	4	0	3	3	2	0	2	0	1	1	0	4	0	3	3	2	0	2	0	2	4	4	5	3	2	1	1	1	2	3	3	3	3	4	5	5	5	4	2	3	2
722	1	1	0	4	0	3	3	2	0	2	0	1	1	0	4	0	3	3	2	0	2	0	2	3	3	0	0	0	2	1	1	4	2	2	2	2	3	3	5	5	5	2	2	2
723	1	1	0	4	0	3	3	2	0	2	0	1	1	0	4	0	3	3	2	0	2	0	4	4	4	2	1	1	2	2	2	1	2	2	2	2	4	5	6	6	5	2	2	3
724	1	1	0	4	0	3	3	2	0	2	0	1	1	0	4	0	3	3	2	0	2	0	4	2	2	1	0	1	3	1	1	2	4	2	2	2	4	1	1	1	4	2	2	2
725	1	1	0	4	0	3	3	2	0	2	0	1	1	0	4	0	3	3	2	0	2	0	4	3	3	1	0	1	1	1	1	4	2	3	3	2	3	3	3	3	2	2	3	2
726	1	1	0	4	0	3	3	2	0	2	0	1	1	0	4	0	3	3	2	0	2	0	4	4	5	-2	-2	-2	4	2	2	4	4	2	2	2	4	4	5	5	5	2	3	3
727	1	1	0	4	0	3	3	2	0	2	0	1	1	0	4	0	3	3	2	0	2	0	3	2	2	2	1	1	2	1	1	4	4	2	2	1	5	3	2	4	1	2	3	3
728	1	1	0	4	0	3	3	2	0	2	0	1	1	0	4	0	3	3	2	0	2	0	2	4	4	2	1	1	1	1	1	4	4	4	3	3	4	6	5	7	4	2	3	3
729	1	1	0	4	0	3	3	2	0	2	0	1	1	0	4	0	3	3	2	0	2	0	4	4	4	1	1	0	1	1	1	4	3	1	4	1	4	2	1	2	1	1	2	4
730	1	1	0	4	0	2	3	2	0	2	0	1	1	0	4	0	2	3	2	0	2	0	2	2	3	2	1	1	1	1	1	2	3	3	3	3	2	3	3	3	2	2	2	3
731	1	1	0	4	0	2	3	2	0	2	0	1	1	0	4	0	2	3	2	0	2	0	4	2	4	1	0	1	1	1	1	4	4	4	4	2	4	6	5	6	4	2	3	3
732	1	1	0	4	0	2	3	2	0	2	0	1	1	0	4	0	2	3	2	0	2	0	2	4	4	2	1	1	2	1	2	4	4	4	3	2	4	4	3	5	3	2	3	3
733	1	1	0	4	0	2	3	2	0	2	0	1	1	0	4	0	2	3	2	0	2	0	3	3	4	1	1	0	1	1	1	4	5	2	5	1	5	4	3	3	6	2	2	2
734	1	1	0	4	0	2	3	2	0	2	0	1	1	0	4	0	2	3	2	0	2	0	3	3	4	2	1	1	1	1	1	4	3	3	3	3	3	5	4	5	4	2	2	3
735	1	1	0	4	0	2	3	2	0	2	0	1	1	0	4	0	2	3	2	0	2	0	4	2	4	2	1	1	1	1	1	2	4	4	4	2	3	7	7	7	5	2	3	2
736	1	1	0	4	0	2	3	2	0	2	0	1	1	0	4	0	2	3	2	0	2	0	4	4	4	2	1	1	1	1	1	2	4	2	2	2	4	5	5	7	5	2	3	2
737	1	1	0	4	0	2	3	2	0	2	0	1	1	0	4	0	2	3	2	0	2	0	4	3	5	1	0	1	1	1	1	4	3	2	2	2	5	4	4	5	9	2	3	4
738	1	1	0	4	0	2	3	2	0	2	0	1	1	0	4	0	2	3	2	0	2	0	4	3	4	2	1	1	2	2	2	4	4	4	3	2	4	5	5	4	5	2	2	4
739	1	1	0	4	0	2	3	2	0	2	0	1	1	0	4	0	2	3	2	0	2	0	3	4	5	2	1	1	5	2	2	4	5	5	5	4	2	8	6	9	6	2	3	-8
740	1	1	0	4	0	2	3	2	0	2	0	1	1	0	4	0	2	3	2	0	2	0	2	4	4	2	1	1	1	1	1	4	4	4	3	2	4	6	5	7	4	2	3	3
741	1	1	0	4	0	2	3	2	0	2	0	1	1	0	4	0	2	3	2	0	2	0	4	2	3	2	1	1	3	1	1	3	5	2	5	1	4	5	4	5	6	2	2	1
742	1	1	0	4	0	2	3	2	0	2	0	1	1	0	4	0	2	3	2	0	2	0	2	4	4	1	1	0	1	1	1	4	2	2	2	2	5	5	5	5	4	2	2	3
743	1	1	0	4	0	2	3	2	0	2	0	1	1	0	4	0	2	3	2	0	2	0	4	4	4	2	1	1	2	1	3	4	4	4	4	2	4	4	4	4	6	2	2	2
744	1	1	0	4	0	2	3	2	0	2	0	1	1	0	4	0	2	3	2	0	2	0	2	4	4	2	1	1	1	1	1	4	4	4	3	4	4	6	5	7	4	2	2	3
745	1	1	0	4	0	2	3	2	0	2	0	1	1	0	4	0	2	3	2	0	2	0	3	4	4	1	1	0	4	1	3	3	2	2	2	2	4	4	4	5	6	1	2	3
746	1	1	0	4	0	2	3	2	0	2	0	1	1	0	4	0	2	3	2	0	2	0	4	4	4	2	1	1	2	1	2	2	4	2	3	2	4	1	3	1	1	2	1	4
747	1	1	0	4	0	2	3	2	0	2	0	1	1	0	4	0	2	3	2	0	2	0	3	4	4	2	1	1	4	1	3	4	2	2	2	2	4	5	4	6	2	2	3	3
748	1	1	0	4	0	2	3	2	0	2	0	1	1	0	4	0	2	3	2	0	2	0	3	3	4	2	1	1	3	2	3	4	3	2	2	2	4	5	3	7	2	3	3	4
749	1	1	0	4	0	2	3	2	0	2	0	1	1	0	4	0	2	3	2	0	2	0	4	2	2	2	1	1	2	1	1	4	3	4	4	2	4	2	2	4	2	1	3	4
750	1	1	0	4	0	2	3	2	0	2	0	1	1	0	4	0	2	3	2	0	2	0	2	4	4	2	1	1	1	1	1	4	4	4	3	4	3	5	4	6	3	2	2	3
751	1	1	0	4	0	2	3	2	0	2	0	1	1	0	4	0	2	3	2	0	2	0	1	4	4	2	1	1	3	1	1	4	4	2	1	1	4	4	1	7	2	2	3	2
752	1	1	0	4	0	2	3	2	0	2	0	1	1	0	4	0	2	3	2	0	2	0	4	4	4	2	1	1	1	1	1	4	4	2	3	3	3	2	3	2	2	2	3	2
753	1	1	0	4	0	2	3	2	0	2	0	1	1	0	4	0	2	3	2	0	2	0	2	4	4	2	1	1	1	1	1	1	4	2	1	1	4	7	6	8	5	2	1	4
754	1	1	0	4	0	2	3	2	0	2	0	1	1	0	4	0	2	3	2	0	2	0	2	4	4	2	1	1	2	2	3	1	2	2	2	2	5	6	6	6	4	2	1	3
755	1	1	0	4	0	2	3	2	0	2	0	1	1	0	4	0	2	3	2	0	2	0	3	3	3	97	97	97	1	1	1	2	3	3	3	3	3	3	3	3	3	2	1	3
756	1	1	0	4	0	2	3	2	0	2	0	1	1	0	4	0	2	3	2	0	2	0	2	4	4	2	1	1	1	1	1	4	4	4	3	4	3	6	5	7	4	2	3	3
757	1	1	0	4	0	2	3	2	0	2	0	1	1	0	4	0	2	3	2	0	2	0	3	3	4	2	1	1	1	1	1	4	2	2	4	4	4	4	4	-8	3	2	2	4
758	1	1	0	4	0	2	3	2	0	2	0	1	1	0	4	0	2	3	2	0	2	0	2	4	4	1	1	0	1	1	1	4	4	4	3	4	4	5	4	6	3	2	3	3
759	1	1	0	4	0	2	3	2	0	2	0	1	1	0	4	0	2	3	2	0	2	0	3	4	5	2	2	0	-8	-8	-8	4	3	3	3	3	3	3	3	3	3	2	2	-8
760	1	1	0	4	0	2	3	2	0	2	0	1	1	0	4	0	2	3	2	0	2	0	4	4	4	2	1	1	1	1	1	2	4	2	4	2	4	2	1	2	2	2	3	3
761	1	1	0	4	0	2	3	2	0	2	0	1	1	0	4	0	2	3	2	0	2	0	2	4	5	1	1	0	1	1	1	4	4	2	4	2	4	6	6	6	4	1	2	2
762	1	1	0	4	0	2	3	2	0	2	0	1	1	0	4	0	2	3	2	0	2	0	2	2	4	2	1	1	2	1	1	4	4	4	4	2	4	7	8	7	8	1	2	-8
763	1	1	0	4	0	2	3	2	0	2	0	1	1	0	4	0	2	3	2	0	2	0	2	4	4	2	1	1	2	1	1	4	4	2	2	2	3	6	4	7	1	2	1	2
764	1	1	0	4	0	2	3	2	0	2	0	1	1	0	4	0	2	3	2	0	2	0	3	4	5	1	1	0	1	1	1	3	4	4	3	2	3	3	3	3	2	2	2	4
765	1	1	0	4	0	2	3	2	0	2	0	1	1	0	4	0	2	3	2	0	2	0	2	4	4	1	97	97	1	1	1	3	4	4	4	2	4	5	4	5	2	1	2	2
766	1	1	0	4	0	2	3	2	0	2	0	1	1	0	4	0	2	3	2	0	2	0	3	2	3	1	1	0	5	1	1	4	4	4	2	2	4	6	4	8	5	2	3	4
767	1	1	0	4	0	2	3	2	0	2	0	1	1	0	4	0	2	3	2	0	2	0	2	4	5	3	2	1	3	1	1	2	4	4	4	2	3	6	6	5	3	1	1	2
768	1	1	0	4	0	2	3	2	0	2	0	1	1	0	4	0	2	3	2	0	2	0	3	4	4	2	1	1	1	1	1	4	4	4	3	4	3	6	5	7	3	2	3	3
769	1	1	0	4	0	2	3	2	0	2	0	1	1	0	4	0	2	3	2	0	2	0	3	2	5	2	1	1	1	1	1	4	2	4	4	1	4	4	7	4	2	2	2	2
770	1	1	0	4	0	2	3	2	0	2	0	1	1	0	4	0	2	3	2	0	2	0	2	4	4	2	1	1	3	1	3	2	4	4	4	2	2	5	3	5	3	2	3	4
771	1	1	0	4	0	2	3	2	0	2	0	1	1	0	4	0	2	3	2	0	2	0	2	4	5	2	1	1	1	1	1	4	2	2	2	2	4	6	6	6	4	1	2	2
772	1	1	0	4	0	2	3	2	0	2	0	1	1	0	4	0	2	3	2	0	2	0	4	3	4	1	0	1	1	1	1	4	4	3	4	1	4	4	2	2	1	1	2	2
773	1	1	0	4	0	2	3	2	0	2	0	1	1	0	4	0	2	3	2	0	2	0	4	4	3	2	1	1	2	1	-8	2	2	2	2	2	4	3	3	3	3	2	2	4
774	1	1	0	4	0	2	3	2	0	2	0	1	1	0	4	0	2	3	2	0	2	0	2	3	4	1	1	0	1	1	1	4	2	2	2	2	4	5	4	6	4	2	2	2
775	1	1	0	4	0	2	3	2	0	2	0	1	1	0	4	0	2	3	2	0	2	0	2	3	4	1	0	1	2	2	2	2	4	4	4	2	4	4	4	5	4	2	3	4
776	1	1	0	4	0	2	3	2	0	2	0	1	1	0	4	0	2	3	2	0	2	0	2	4	5	1	97	97	2	1	4	2	4	4	2	1	5	6	6	7	3	1	3	2
777	1	1	0	4	0	2	3	2	0	2	0	1	1	0	4	0	2	3	2	0	2	0	2	3	4	2	1	1	1	1	1	3	4	4	4	3	4	7	6	7	5	2	2	3
778	1	1	0	4	0	2	3	2	0	2	0	1	1	0	4	0	2	3	2	0	2	0	2	4	4	2	1	1	1	1	1	4	4	2	3	2	4	4	3	5	2	2	2	2
779	1	1	0	4	0	2	3	2	0	2	0	1	1	0	4	0	2	3	2	0	2	0	4	4	4	1	0	1	4	3	3	4	2	2	4	3	4	3	3	2	2	2	-8	3
780	1	1	0	4	0	2	3	2	0	2	0	1	1	0	4	0	2	3	2	0	2	0	4	2	4	2	1	1	1	1	1	4	2	2	2	2	4	5	5	7	3	3	3	4
781	1	1	0	4	0	2	3	2	0	2	0	1	1	0	4	0	2	3	2	0	2	0	3	4	4	2	1	1	3	1	3	2	4	2	2	2	3	4	2	4	2	2	3	3
782	1	1	0	4	0	2	3	2	0	2	0	1	1	0	4	0	2	3	2	0	2	0	4	4	4	2	1	1	1	1	1	4	3	4	3	2	4	4	3	4	5	2	1	4
783	1	1	0	4	0	2	3	2	0	2	0	1	1	0	4	0	2	3	2	0	2	0	2	3	4	1	0	1	1	1	1	3	4	4	3	2	3	5	5	5	5	1	2	4
784	1	1	0	4	0	2	3	2	0	2	0	1	1	0	4	0	2	3	2	0	2	0	2	4	4	1	0	1	1	1	1	4	4	2	3	2	4	6	5	7	4	1	2	3
785	1	1	0	4	0	2	3	2	0	2	0	1	1	0	4	0	2	3	2	0	2	0	4	2	4	2	1	1	1	1	1	4	3	3	5	3	4	4	4	4	1	1	3	2
786	1	1	0	4	0	2	3	2	0	2	0	1	1	0	4	0	2	3	2	0	2	0	4	4	5	1	1	0	3	1	1	4	4	4	3	2	3	5	5	5	5	2	3	4
787	1	1	0	4	0	2	3	2	0	2	0	1	1	0	4	0	2	3	2	0	2	0	3	4	3	-2	-2	-2	3	3	3	2	4	3	2	2	4	2	2	3	4	2	3	2
788	1	1	0	4	0	2	4	2	0	2	0	1	1	0	4	0	2	4	2	0	2	0	4	2	4	2	1	1	4	1	3	4	2	2	2	1	4	3	3	5	3	1	1	2
789	1	1	0	4	0	2	4	2	0	2	0	1	1	0	4	0	2	4	2	0	2	0	4	4	4	2	1	1	4	1	3	2	4	2	2	2	4	5	5	6	5	2	2	2
790	1	1	0	4	0	2	4	2	0	2	0	1	1	0	4	0	2	4	2	0	2	0	4	3	4	1	1	0	1	1	1	4	3	2	4	2	4	4	4	4	6	2	2	4
791	1	1	0	4	0	2	4	2	0	2	0	1	1	0	4	0	2	4	2	0	2	0	2	4	4	2	1	1	1	1	1	4	2	2	2	2	4	6	6	6	6	2	3	2
792	1	1	0	4	0	2	4	2	0	2	0	1	1	0	4	0	2	4	2	0	2	0	2	4	4	2	1	1	1	1	1	4	2	2	2	2	4	4	3	5	2	2	1	2
793	1	1	0	4	0	2	4	2	0	2	0	1	1	0	4	0	2	4	2	0	2	0	4	4	4	2	1	1	1	1	1	4	2	4	3	2	5	5	5	5	3	2	2	2
794	1	1	0	4	0	2	4	2	0	2	0	1	1	0	4	0	2	4	2	0	2	0	4	4	4	1	0	1	3	1	3	2	3	3	3	3	3	1	1	1	5	2	3	5
795	1	1	0	4	0	2	4	2	0	2	0	1	1	0	4	0	2	4	2	0	2	0	2	4	4	2	1	1	1	1	1	4	4	4	3	4	4	5	4	6	3	2	3	3
796	1	1	0	4	0	2	4	2	0	2	0	1	1	0	4	0	2	4	2	0	2	0	3	4	4	3	97	97	4	2	3	4	4	2	2	2	4	5	3	5	1	2	3	2
797	1	1	0	4	0	2	4	2	0	2	0	1	1	0	4	0	2	4	2	0	2	0	2	4	4	2	1	1	1	1	1	4	4	4	3	4	3	5	4	6	3	2	3	3
798	1	1	0	4	0	2	4	2	0	2	0	1	1	0	4	0	2	4	2	0	2	0	2	4	4	2	1	1	1	1	1	4	4	4	3	4	3	5	4	6	3	2	2	3
799	1	1	0	4	0	2	4	2	0	2	0	1	1	0	4	0	2	4	2	0	2	0	4	4	5	2	1	1	1	1	1	1	2	2	1	1	3	7	7	7	5	1	2	2
800	1	1	0	4	0	2	4	2	0	2	0	1	1	0	4	0	2	4	2	0	2	0	4	3	4	2	1	1	3	1	3	4	2	2	2	1	4	5	5	5	4	2	2	2
801	1	1	0	4	0	2	4	2	0	2	0	1	1	0	4	0	2	4	2	0	2	0	3	4	4	2	1	1	3	1	1	4	4	4	4	4	4	4	1	10	6	2	3	4
802	1	1	0	4	0	2	4	2	0	2	0	1	1	0	4	0	2	4	2	0	2	0	3	4	4	2	97	97	1	1	1	1	4	2	2	2	4	1	1	1	3	1	2	2
803	1	1	0	4	0	2	4	2	0	2	0	1	1	0	4	0	2	4	2	0	2	0	2	4	4	2	1	1	1	1	1	4	3	3	2	2	4	9	5	7	3	1	2	2
804	1	1	0	4	0	2	4	2	0	2	0	1	1	0	4	0	2	4	2	0	2	0	2	4	4	2	1	1	1	1	1	3	4	4	3	3	3	2	2	2	2	2	3	4
805	1	1	0	4	0	2	4	2	0	2	0	1	1	0	4	0	2	4	2	0	2	0	2	4	4	2	0	2	2	2	3	2	4	4	4	2	4	6	5	6	6	2	3	2
806	1	1	0	4	0	2	4	2	0	2	0	1	1	0	4	0	2	4	2	0	2	0	3	2	3	2	1	1	1	1	1	2	5	2	5	1	5	4	7	3	9	2	2	3
807	1	1	0	4	0	2	4	2	0	2	0	1	1	0	4	0	2	4	2	0	2	0	3	4	4	1	0	1	3	1	2	4	2	4	3	3	4	5	5	5	4	2	3	3
808	1	1	0	4	0	2	4	2	0	2	0	1	1	0	4	0	2	4	2	0	2	0	3	3	4	3	97	97	1	1	1	2	2	2	2	2	4	6	7	6	6	2	3	2
809	1	1	0	4	0	2	4	2	0	2	0	1	1	0	4	0	2	4	2	0	2	0	2	4	4	1	97	97	4	2	1	2	4	2	2	2	2	5	5	6	3	2	1	2
810	1	1	0	4	0	2	4	2	0	2	0	1	1	0	4	0	2	4	2	0	2	0	4	3	4	2	1	1	2	1	1	4	3	2	4	4	4	6	5	7	6	2	2	3
811	1	1	0	4	0	2	5	2	0	2	0	1	1	0	4	0	2	5	2	0	2	0	1	4	4	2	97	97	3	1	3	4	4	2	4	2	3	4	4	4	2	2	2	3
812	1	1	0	4	0	2	5	2	0	2	0	1	1	0	4	0	2	5	2	0	2	0	2	2	2	97	97	97	1	1	1	4	4	2	2	2	5	4	4	4	3	2	2	4
813	1	1	0	4	0	2	5	2	0	2	0	1	1	0	4	0	2	5	2	0	2	0	2	4	5	2	97	97	3	1	3	4	3	2	2	2	3	4	5	4	3	2	2	-8
814	1	1	0	4	0	2	5	2	0	2	0	1	1	0	4	0	2	5	2	0	2	0	3	4	3	1	1	0	1	1	1	4	4	4	3	3	3	2	2	2	2	2	3	4
815	1	1	0	4	0	2	5	2	0	2	0	1	1	0	4	0	2	5	2	0	2	0	4	3	3	2	1	1	1	1	1	4	4	2	4	2	2	2	2	2	1	1	2	2
816	1	1	0	4	0	2	5	2	0	2	0	1	1	0	4	0	2	5	2	0	2	0	2	2	4	1	97	97	2	1	1	4	2	2	3	2	4	4	5	4	2	1	2	3
817	1	1	0	4	0	2	5	2	0	2	0	1	1	0	4	0	2	5	2	0	2	0	2	2	4	3	2	1	1	1	1	3	2	2	2	2	5	7	7	-8	4	1	2	4
818	1	1	0	4	0	2	5	2	0	2	0	1	1	0	4	0	2	5	2	0	2	0	3	3	4	0	0	0	1	1	1	4	3	2	2	2	2	3	4	3	2	2	2	2
819	1	1	0	4	0	2	5	2	0	2	0	1	1	0	4	0	2	5	2	0	2	0	2	4	4	1	0	1	1	1	1	4	4	3	2	2	4	4	3	5	2	2	2	3
820	1	1	0	4	0	2	5	2	0	2	0	1	1	0	4	0	2	5	2	0	2	0	2	4	4	2	1	1	1	1	1	4	2	2	4	2	4	5	5	5	4	1	2	3
821	1	1	0	4	0	2	5	2	0	2	0	1	1	0	4	0	2	5	2	0	2	0	4	4	4	2	1	1	1	1	1	3	4	4	4	2	3	6	6	6	5	1	2	2
822	1	1	0	4	0	2	5	2	0	2	0	1	1	0	4	0	2	5	2	0	2	0	2	2	4	2	97	97	2	1	3	1	1	1	2	1	5	5	5	5	6	1	2	2
823	1	1	0	4	0	2	5	2	0	2	0	1	1	0	4	0	2	5	2	0	2	0	3	2	4	-3	-3	-3	4	1	3	4	4	4	4	4	4	1	1	1	1	1	3	2
824	1	1	0	4	0	2	5	2	0	2	0	1	1	0	4	0	2	5	2	0	2	0	2	2	5	97	97	97	3	1	1	4	2	2	4	2	4	3	3	3	5	1	2	3
825	1	1	0	4	0	2	5	2	0	2	0	1	1	0	4	0	2	5	2	0	2	0	3	4	4	2	1	1	4	1	3	4	2	1	3	1	4	5	5	6	3	2	-8	2
826	1	1	0	4	0	2	5	2	0	2	0	1	1	0	4	0	2	5	2	0	2	0	3	3	1	2	1	1	4	1	1	2	4	4	3	3	3	1	1	6	2	2	3	3
827	1	1	0	4	0	2	6	2	0	2	0	1	1	0	4	0	2	6	2	0	2	0	2	4	4	2	1	1	2	2	2	4	4	4	4	2	4	5	5	5	5	2	2	2
828	1	1	0	4	0	2	6	2	0	2	0	1	1	0	4	0	2	6	2	0	2	0	4	2	4	2	1	1	3	1	1	4	4	3	3	2	4	4	4	5	4	2	3	2
829	1	1	0	4	0	2	6	2	0	2	0	1	1	0	4	0	2	6	2	0	2	0	2	3	4	2	1	1	1	1	1	4	2	2	3	2	4	6	4	5	2	1	2	2
830	1	1	0	4	0	2	6	2	0	2	0	1	1	0	4	0	2	6	2	0	2	0	2	3	4	1	97	97	1	1	1	3	3	3	2	2	4	5	6	5	4	2	1	4
831	1	1	0	4	0	2	6	2	0	2	0	1	1	0	4	0	2	6	2	0	2	0	2	4	4	1	0	1	1	1	2	2	4	3	3	2	4	4	4	4	3	1	3	3
832	1	1	0	4	0	2	6	2	0	2	0	1	1	0	4	0	2	6	2	0	2	0	4	3	3	2	1	1	2	1	1	4	3	2	4	3	4	3	2	4	2	2	3	3
833	1	1	0	4	0	2	6	2	0	2	0	1	1	0	4	0	2	6	2	0	2	0	4	2	2	2	1	1	2	2	3	4	2	2	2	2	4	4	4	4	4	2	1	2
834	1	1	0	4	0	2	6	2	0	2	0	1	1	0	4	0	2	6	2	0	2	0	2	3	4	2	1	1	1	1	1	2	2	2	4	2	4	4	3	4	1	1	2	2
835	1	1	0	4	0	2	6	2	0	2	0	1	1	0	4	0	2	6	2	0	2	0	4	2	4	1	0	1	3	1	3	4	2	2	4	1	4	5	5	6	5	2	3	4
836	1	1	0	4	0	2	6	2	0	2	0	1	1	0	4	0	2	6	2	0	2	0	3	2	5	2	1	1	2	1	1	2	2	2	4	1	1	5	5	7	9	2	3	4
837	1	1	0	4	0	2	6	2	0	2	0	1	1	0	4	0	2	6	2	0	2	0	2	4	4	2	1	1	1	1	1	2	4	4	2	4	4	7	5	8	2	1	3	4
838	1	1	0	4	0	2	6	2	0	2	0	1	1	0	4	0	2	6	2	0	2	0	4	2	5	2	1	1	2	1	1	2	4	2	2	-8	5	5	4	6	2	1	3	2
839	1	1	0	4	0	2	6	2	0	2	0	1	1	0	4	0	2	6	2	0	2	0	2	3	5	2	1	1	1	1	1	2	3	1	3	1	3	5	5	6	5	1	3	3
840	1	1	0	4	0	2	6	2	0	2	0	1	1	0	4	0	2	6	2	0	2	0	4	2	4	2	1	1	1	1	1	2	2	2	2	4	4	5	4	6	2	1	3	2
841	1	1	0	4	0	2	6	2	0	2	0	1	1	0	4	0	2	6	2	0	2	0	4	1	5	2	1	1	1	1	1	4	5	1	4	1	5	5	6	6	5	1	3	2
842	1	1	0	4	0	2	6	2	0	2	0	1	1	0	4	0	2	6	2	0	2	0	4	4	4	2	1	1	1	1	1	2	5	4	4	2	5	4	3	6	1	1	1	4
843	1	1	0	4	0	2	6	2	0	2	0	1	1	0	4	0	2	6	2	0	2	0	4	2	2	1	0	1	1	1	1	4	2	4	4	1	5	6	6	8	6	3	3	4
844	1	1	0	4	0	2	6	2	0	2	0	1	1	0	4	0	2	6	2	0	2	0	5	1	5	3	2	1	3	1	1	4	5	5	5	5	4	6	6	8	3	2	3	2
845	1	1	0	4	0	2	6	2	0	2	0	1	1	0	4	0	2	6	2	0	2	0	5	4	4	2	1	1	3	1	1	4	5	4	4	4	5	5	4	6	2	1	3	2
846	1	1	0	4	0	2	6	2	0	2	0	1	1	0	4	0	2	6	2	0	2	0	1	2	4	2	0	2	1	1	1	2	2	4	2	1	5	5	3	6	2	1	3	1
847	1	1	0	4	0	2	6	2	0	2	0	1	1	0	4	0	2	6	2	0	2	0	5	1	4	2	1	1	1	1	1	2	1	2	5	4	5	4	3	5	2	2	3	4
848	1	1	0	4	0	2	6	2	0	2	0	1	1	0	4	0	2	6	2	0	2	0	2	4	4	2	97	97	2	1	1	4	5	2	2	2	4	5	4	6	4	1	3	4
849	1	1	0	4	0	2	6	2	0	2	0	1	1	0	4	0	2	6	2	0	2	0	4	1	2	2	1	1	1	1	3	2	3	4	5	2	4	2	1	-8	1	1	3	2
850	1	1	0	4	0	2	7	2	0	2	0	1	1	0	4	0	2	7	2	0	2	0	4	4	4	2	1	1	2	1	-8	2	2	1	1	1	5	5	4	7	4	1	3	1
851	1	1	0	4	0	2	7	2	0	2	0	1	1	0	4	0	2	7	2	0	2	0	4	2	2	2	1	1	2	2	1	2	4	2	1	2	5	4	7	5	1	1	3	5
852	1	1	0	4	0	2	7	2	0	2	0	1	1	0	4	0	2	7	2	0	2	0	2	3	3	2	1	1	4	3	2	4	1	4	5	1	5	5	4	6	3	1	3	3
853	1	1	0	4	0	2	7	2	0	2	0	1	1	0	4	0	2	7	2	0	2	0	5	4	5	2	1	1	5	1	3	3	4	5	5	2	5	4	4	5	2	2	3	1
854	1	1	0	4	0	2	7	2	0	2	0	1	1	0	4	0	2	7	2	0	2	0	3	3	5	2	1	1	1	1	1	2	3	4	2	2	2	-8	-8	-8	4	2	3	2
855	1	1	0	4	0	2	7	2	0	2	0	1	1	0	4	0	2	7	2	0	2	0	3	2	4	2	1	1	2	2	2	2	4	3	4	2	5	7	5	8	5	1	1	2
856	1	1	0	4	0	2	7	2	0	2	0	1	1	0	4	0	2	7	2	0	2	0	4	4	4	2	1	1	2	1	-8	2	-8	2	4	2	4	5	2	5	1	1	3	2
857	1	1	0	4	0	2	7	2	0	2	0	1	1	0	4	0	2	7	2	0	2	0	4	4	3	2	1	1	1	1	1	2	4	2	4	4	4	5	5	6	5	1	3	4
858	1	1	0	4	0	2	7	2	0	2	0	1	1	0	4	0	2	7	2	0	2	0	4	2	4	1	97	97	3	1	-8	2	2	2	3	2	5	1	1	1	1	3	1	4
859	1	1	0	4	0	2	7	2	0	2	0	1	1	0	4	0	2	7	2	0	2	0	2	1	4	2	97	97	3	1	3	2	2	1	4	1	5	4	1	5	1	2	1	5
860	1	1	0	4	0	2	7	2	0	2	0	1	1	0	4	0	2	7	2	0	2	0	2	4	4	2	1	1	1	1	1	2	4	3	2	1	4	5	2	6	1	3	3	5
861	1	1	0	4	0	2	7	2	0	2	0	1	1	0	4	0	2	7	2	0	2	0	2	4	5	6	2	4	1	1	1	4	-8	-8	4	3	4	6	6	6	6	2	3	-8
862	1	1	0	4	0	2	7	2	0	2	0	1	1	0	4	0	2	7	2	0	2	0	2	4	5	1	0	1	4	1	1	2	1	1	1	1	5	7	7	7	5	1	3	3
863	1	1	0	4	0	2	7	2	0	2	0	1	1	0	4	0	2	7	2	0	2	0	2	4	4	1	1	0	1	1	1	2	2	2	2	2	5	4	3	5	3	2	3	2
864	1	1	0	4	0	2	7	2	0	2	0	1	1	0	4	0	2	7	2	0	2	0	4	5	5	2	1	1	1	1	1	1	4	1	4	1	2	4	1	5	3	1	3	5
865	1	1	0	4	0	2	7	2	0	2	0	1	1	0	4	0	2	7	2	0	2	0	2	5	5	0	0	0	1	1	1	2	5	1	5	1	5	5	5	5	1	1	3	1
866	1	1	0	4	0	2	7	2	0	2	0	1	1	0	4	0	2	7	2	0	2	0	4	3	4	2	1	1	1	1	1	1	2	2	4	2	4	4	5	4	4	1	3	3
867	1	1	0	4	0	2	7	2	0	2	0	1	1	0	4	0	2	7	2	0	2	0	4	2	3	2	1	1	1	1	1	4	2	2	4	-8	5	6	7	-8	8	2	3	1
868	1	1	0	4	0	2	7	2	0	2	0	1	1	0	4	0	2	7	2	0	2	0	3	4	4	2	1	1	-8	-8	1	2	5	3	5	2	5	3	1	4	1	1	3	4
869	1	1	0	4	0	2	8	2	0	2	0	1	1	0	4	0	2	8	2	0	2	0	2	2	4	2	1	1	2	1	1	2	4	4	4	2	5	4	4	10	9	1	3	2
870	1	1	0	4	0	2	8	2	0	2	0	1	1	0	4	0	2	8	2	0	2	0	4	2	5	2	1	1	4	1	3	2	1	5	2	2	5	4	5	3	2	1	3	1
871	1	1	0	4	0	2	8	2	0	2	0	1	1	0	4	0	2	8	2	0	2	0	1	5	3	2	2	0	3	1	3	2	1	5	5	1	5	1	4	1	1	1	3	1
872	1	1	0	4	0	2	8	2	0	2	0	1	1	0	4	0	2	8	2	0	2	0	5	2	4	2	1	1	2	1	3	2	2	4	4	3	4	5	3	7	3	2	1	4
873	1	1	0	4	0	2	8	2	0	2	0	1	1	0	4	0	2	8	2	0	2	0	4	2	3	1	0	1	2	1	1	2	4	4	2	2	4	1	1	1	1	1	3	3
874	1	1	0	4	0	2	8	2	0	2	0	1	1	0	4	0	2	8	2	0	2	0	4	4	4	2	1	1	1	1	1	2	3	4	4	2	4	5	5	7	2	1	3	4
875	1	1	0	4	0	2	8	2	0	2	0	1	1	0	4	0	2	8	2	0	2	0	2	4	5	1	97	97	2	1	1	4	1	2	2	2	5	6	5	6	5	1	-8	2
876	1	1	0	4	0	2	8	2	0	2	0	1	1	0	4	0	2	8	2	0	2	0	4	3	5	2	2	0	1	1	1	2	2	4	4	4	5	5	4	5	4	2	3	3
877	1	1	0	4	0	2	8	2	0	2	0	1	1	0	4	0	2	8	2	0	2	0	1	4	4	2	1	1	2	1	1	2	4	2	4	1	5	4	2	6	3	1	1	5
878	1	1	0	4	0	2	8	2	0	2	0	1	1	0	4	0	2	8	2	0	2	0	2	2	4	1	0	1	3	1	4	2	3	4	3	2	4	4	4	4	4	1	3	4
879	1	1	0	4	0	2	8	2	0	2	0	1	1	0	4	0	2	8	2	0	2	0	4	3	5	2	1	1	1	1	1	2	1	3	3	3	5	5	5	5	3	-8	3	1
880	1	1	0	4	0	2	8	2	0	2	0	1	1	0	4	0	2	8	2	0	2	0	2	4	5	2	1	1	1	1	1	2	4	4	1	1	3	4	4	4	4	1	3	3
881	1	1	0	4	0	2	8	2	0	2	0	1	1	0	4	0	2	8	2	0	2	0	4	4	5	5	2	3	-8	1	1	4	-8	-8	-8	-8	4	1	-8	-8	-8	2	3	4
882	1	1	0	4	0	2	8	2	0	2	0	1	1	0	4	0	2	8	2	0	2	0	2	4	4	3	1	2	1	1	1	3	4	2	2	1	5	6	2	9	1	2	1	2
883	1	1	0	4	0	2	8	2	0	2	0	1	1	0	4	0	2	8	2	0	2	0	4	1	2	2	97	97	3	1	3	2	3	2	2	1	3	4	3	6	5	2	3	3
884	1	1	0	4	0	2	8	2	0	2	0	1	1	0	4	0	2	8	2	0	2	0	2	1	3	2	1	1	3	3	1	2	5	1	5	-8	5	1	1	1	1	2	3	-8
885	1	1	0	4	0	2	8	2	0	2	0	1	1	0	4	0	2	8	2	0	2	0	5	1	3	2	1	1	1	1	2	2	5	5	4	5	5	6	2	8	1	1	3	1
886	1	1	0	4	0	2	8	2	0	2	0	1	1	0	4	0	2	8	2	0	2	0	2	5	5	2	1	1	1	1	1	2	5	4	4	2	5	1	1	1	1	1	3	-8
887	1	1	0	4	0	2	8	2	0	2	0	1	1	0	4	0	2	8	2	0	2	0	2	2	4	2	1	1	2	1	1	2	4	4	4	2	4	5	4	6	4	1	3	4
888	1	1	0	4	0	2	8	2	0	2	0	1	1	0	4	0	2	8	2	0	2	0	2	3	5	2	1	1	1	1	-8	2	4	4	2	3	4	5	5	7	5	1	3	4
889	1	1	0	4	0	2	8	2	0	2	0	1	1	0	4	0	2	8	2	0	2	0	5	1	5	3	1	2	-8	1	1	1	5	2	3	4	4	3	1	6	4	2	3	4
890	1	1	0	4	0	2	8	2	0	2	0	1	1	0	4	0	2	8	2	0	2	0	4	4	4	2	0	2	3	1	1	2	4	2	4	2	4	3	2	5	2	1	3	2
891	1	1	0	4	0	2	8	2	0	2	0	1	1	0	4	0	2	8	2	0	2	0	2	4	4	2	1	1	1	1	1	2	4	4	4	3	4	6	6	7	6	1	3	2
892	1	1	0	4	0	2	8	2	0	2	0	1	1	0	4	0	2	8	2	0	2	0	4	4	4	1	1	0	3	1	1	2	4	4	2	4	5	5	7	-8	3	1	3	2
893	1	1	0	4	0	2	8	2	0	2	0	1	1	0	4	0	2	8	2	0	2	0	2	-8	5	2	1	1	1	1	1	2	2	1	3	1	5	5	3	6	2	3	3	4
894	1	1	0	4	0	2	8	2	0	2	0	1	1	0	4	0	2	8	2	0	2	0	5	1	3	1	97	97	3	1	1	2	3	1	5	1	5	3	1	2	1	1	3	1
895	1	1	0	4	0	2	8	2	0	2	0	1	1	0	4	0	2	8	2	0	2	0	4	4	4	2	1	1	2	2	2	2	2	2	2	2	5	7	6	8	1	2	1	4
896	1	1	0	4	0	2	8	2	0	2	0	1	1	0	4	0	2	8	2	0	2	0	2	4	5	3	2	1	1	1	3	1	4	4	4	3	2	4	3	4	2	3	3	2
897	1	1	0	4	0	2	8	2	0	2	0	1	1	0	4	0	2	8	2	0	2	0	-8	2	1	3	97	97	1	1	1	2	2	2	4	2	5	1	1	1	1	2	3	5
898	1	1	0	4	0	2	8	2	0	2	0	1	1	0	4	0	2	8	2	0	2	0	5	3	4	1	0	1	2	1	2	2	2	4	4	1	4	3	3	7	3	1	3	2
899	1	1	0	4	0	2	8	2	0	2	0	1	1	0	4	0	2	8	2	0	2	0	4	4	5	2	1	1	1	1	1	2	5	5	2	2	4	5	3	10	3	1	3	2
900	1	1	0	4	0	2	8	2	0	2	0	1	1	0	4	0	2	8	2	0	2	0	4	3	4	2	1	1	3	1	1	2	4	2	3	2	4	5	5	-8	4	2	1	4
901	1	1	0	4	0	2	8	2	0	2	0	1	1	0	4	0	2	8	2	0	2	0	5	4	5	1	1	0	3	1	1	1	1	1	1	1	1	6	6	6	5	1	3	5
902	1	1	0	4	0	2	8	2	0	2	0	1	1	0	4	0	2	8	2	0	2	0	2	4	4	1	1	0	1	1	1	2	4	2	2	-8	5	5	4	6	2	1	3	4
903	1	1	0	4	0	2	8	2	0	2	0	1	1	0	4	0	2	8	2	0	2	0	2	3	4	1	1	0	3	1	1	2	4	4	4	-8	4	5	4	6	5	2	3	2
904	1	1	0	4	0	2	8	2	0	2	0	1	1	0	4	0	2	8	2	0	2	0	2	2	4	1	97	97	2	1	1	1	2	-8	4	4	4	6	5	6	5	-8	2	2
905	1	1	0	4	0	2	8	2	0	2	0	1	1	0	4	0	2	8	2	0	2	0	4	4	5	5	3	2	1	1	3	2	5	1	2	2	1	5	6	5	3	1	3	2
906	1	1	0	4	0	2	8	2	0	2	0	1	1	0	4	0	2	8	2	0	2	0	4	4	5	2	1	1	3	1	3	2	4	5	3	1	5	5	-8	6	4	2	3	-8
907	1	1	0	4	0	2	8	2	0	2	0	1	1	0	4	0	2	8	2	0	2	0	4	1	2	2	1	1	1	2	3	2	3	5	3	3	4	5	5	6	-8	1	3	1
908	1	1	0	4	0	2	8	2	0	2	0	1	1	0	4	0	2	8	2	0	2	0	4	1	4	1	1	0	1	1	3	2	4	3	4	3	4	5	2	8	2	-8	3	2
909	1	1	0	4	0	2	8	1	0	2	0	1	1	0	4	0	2	8	1	0	2	0	2	4	2	2	1	1	1	1	1	2	5	4	1	1	5	6	6	7	1	1	3	1
910	1	1	0	4	0	2	8	1	0	2	0	1	1	0	4	0	2	8	1	0	2	0	-8	3	5	1	1	0	1	1	-8	2	4	4	4	-8	4	5	5	5	5	1	3	2
911	1	1	0	4	0	2	8	1	0	2	0	1	1	0	4	0	2	8	1	0	2	0	4	3	4	2	1	1	1	1	1	2	4	3	2	3	3	2	1	-8	1	1	3	2
912	1	1	0	4	0	2	8	1	0	2	0	1	1	0	4	0	2	8	1	0	2	0	4	3	4	2	1	1	1	1	1	2	5	4	4	4	5	5	4	6	3	1	3	4
913	1	1	0	4	0	2	8	1	0	2	0	1	1	0	4	0	2	8	1	0	2	0	4	2	4	2	1	1	3	1	1	2	1	2	1	1	5	6	3	9	3	1	3	1
914	1	1	0	4	0	2	8	1	0	2	0	1	1	0	4	0	2	8	1	0	2	0	2	1	5	2	1	1	2	1	1	2	5	5	1	5	5	5	5	6	5	2	3	2
915	1	1	0	4	0	2	8	1	0	2	0	1	1	0	4	0	2	8	1	0	2	0	2	4	5	2	1	1	1	1	1	1	5	2	1	1	5	4	3	4	1	2	1	5
916	1	1	0	4	0	2	8	1	0	2	0	1	1	0	4	0	2	8	1	0	2	0	2	3	4	1	1	0	3	1	1	2	5	5	4	3	4	-8	-8	-8	-8	2	3	2
917	1	1	0	4	0	2	8	1	0	2	0	1	1	0	4	0	2	8	1	0	2	0	3	2	2	2	2	0	3	1	1	3	5	2	3	3	5	1	5	-8	1	1	3	3
918	1	1	0	4	0	2	8	1	0	2	0	1	1	0	4	0	2	8	1	0	2	0	2	3	4	2	1	1	3	2	3	4	2	2	4	2	3	6	5	7	4	1	3	-8
919	1	1	0	4	0	2	8	1	0	2	0	1	1	0	4	0	2	8	1	0	2	0	4	2	5	2	1	1	3	1	1	2	3	4	4	1	5	5	4	6	4	2	3	4
920	1	1	0	4	0	2	8	1	0	2	0	1	1	0	4	0	2	8	1	0	2	0	4	3	4	2	2	0	3	1	4	2	4	5	3	3	2	7	6	8	4	2	3	3
921	1	1	0	4	0	2	8	1	0	2	0	1	1	0	4	0	2	8	1	0	2	0	4	4	4	3	1	2	2	1	2	2	4	5	5	2	4	4	3	5	2	1	3	2
922	1	1	0	4	0	2	8	1	0	2	0	1	1	0	4	0	2	8	1	0	2	0	1	5	5	2	1	1	1	1	1	2	5	5	5	5	5	5	5	4	1	1	3	5
923	1	1	0	4	0	2	8	1	0	2	0	1	1	0	4	0	2	8	1	0	2	0	1	1	5	2	97	97	5	3	3	4	2	1	3	1	5	6	1	8	5	2	2	1
924	1	1	0	4	0	2	9	1	0	2	0	1	1	0	4	0	2	9	1	0	2	0	1	1	4	1	1	0	2	1	1	2	4	1	2	1	4	4	4	4	4	1	3	2
925	1	1	0	4	0	2	9	1	0	2	0	1	1	0	4	0	2	9	1	0	2	0	2	4	5	2	1	1	1	1	1	2	-8	2	2	2	4	5	5	6	3	1	3	-8
926	1	1	0	4	0	2	9	1	0	2	0	1	1	0	4	0	2	9	1	0	2	0	4	4	4	2	1	1	2	2	1	2	4	4	4	2	4	5	6	6	3	2	1	3
927	1	1	0	4	0	2	9	1	0	2	0	1	1	0	4	0	2	9	1	0	2	0	4	3	4	2	1	1	1	1	1	2	2	2	2	2	3	4	3	6	4	1	3	2
928	1	1	0	4	0	2	9	1	0	2	0	1	1	0	4	0	2	9	1	0	2	0	4	3	4	2	1	1	3	2	1	2	4	4	2	2	4	5	2	8	2	2	3	2
929	1	1	0	4	0	2	9	1	0	2	0	1	1	0	4	0	2	9	1	0	2	0	4	2	5	2	1	1	1	1	2	4	4	4	5	2	5	6	4	8	5	-8	3	2
930	1	1	0	4	0	2	9	1	0	2	0	1	1	0	4	0	2	9	1	0	2	0	2	4	4	2	2	0	2	2	1	2	4	2	4	2	5	5	3	6	1	1	3	4
931	1	1	0	4	0	2	9	1	0	2	0	1	1	0	4	0	2	9	1	0	2	0	4	4	4	2	0	2	1	1	1	2	2	2	2	2	4	3	2	5	1	2	3	2
932	1	1	0	4	0	2	9	1	0	2	0	1	1	0	4	0	2	9	1	0	2	0	3	1	4	2	1	1	3	1	3	2	1	1	2	2	4	3	3	6	5	1	3	3
933	1	1	0	4	0	2	9	1	0	2	0	1	1	0	4	0	2	9	1	0	2	0	2	4	5	5	97	97	1	1	1	2	2	2	2	2	5	6	4	6	4	1	3	4
934	1	1	0	4	0	2	9	1	0	2	0	1	1	0	4	0	2	9	1	0	2	0	4	4	4	3	1	2	1	1	1	2	4	2	4	2	4	6	5	-8	2	3	1	4
935	1	1	0	4	0	2	9	1	0	2	0	1	1	0	4	0	2	9	1	0	2	0	4	1	5	2	1	1	1	1	4	2	1	2	1	1	4	1	1	6	1	3	3	5
936	1	1	0	4	0	2	9	1	0	2	0	1	1	0	4	0	2	9	1	0	2	0	3	4	4	2	1	1	3	3	-8	4	2	4	4	2	4	3	3	4	5	2	3	-8
937	1	1	0	4	0	2	9	1	0	2	0	1	1	0	4	0	2	9	1	0	2	0	2	2	2	0	0	0	5	1	1	4	4	4	4	2	5	3	3	3	3	1	3	2
938	1	1	0	4	0	2	9	1	0	2	0	1	1	0	4	0	2	9	1	0	2	0	5	1	3	2	1	1	4	3	3	4	4	4	3	1	4	1	1	6	1	-8	3	5
939	1	1	0	4	0	2	9	1	0	2	0	1	1	0	4	0	2	9	1	0	2	0	5	1	3	2	1	1	3	1	1	4	1	1	1	1	4	4	1	10	1	1	3	1
940	1	1	0	4	0	2	9	1	0	2	0	1	1	0	4	0	2	9	1	0	2	0	2	2	2	1	1	0	1	1	1	4	2	2	4	4	4	6	6	7	8	1	3	1
941	1	1	0	4	0	2	9	1	0	2	0	1	1	0	4	0	2	9	1	0	2	0	3	2	4	2	2	0	1	1	1	2	4	4	4	-8	4	1	1	1	1	1	3	2
942	1	1	0	4	0	2	9	1	0	2	0	1	1	0	4	0	2	9	1	0	2	0	4	3	5	2	1	1	2	1	2	2	2	4	2	2	5	6	1	6	1	1	3	4
943	1	1	0	4	0	2	9	1	0	2	0	1	1	0	4	0	2	9	1	0	2	0	4	2	5	2	1	1	1	1	1	4	2	2	4	2	5	6	4	6	4	1	3	2
944	1	1	0	4	0	2	9	1	0	2	0	1	1	0	4	0	2	9	1	0	2	0	4	2	4	2	1	1	1	1	1	2	4	4	4	4	4	5	8	4	2	1	3	2
945	1	1	0	4	0	2	9	1	0	2	0	1	1	0	4	0	2	9	1	0	2	0	2	2	3	2	1	1	1	1	1	2	5	5	3	4	4	5	1	5	1	1	3	4
946	1	1	0	4	0	2	9	1	0	2	0	1	1	0	4	0	2	9	1	0	2	0	3	2	4	2	1	1	2	1	1	2	4	5	5	1	4	7	7	5	4	1	3	2
947	1	1	0	4	0	2	9	1	0	2	0	1	1	0	4	0	2	9	1	0	2	0	4	2	3	2	1	1	1	1	1	4	4	1	2	1	4	3	1	3	3	1	3	1
948	1	1	0	3	0	2	9	1	0	2	0	1	1	0	3	0	2	9	1	0	2	0	4	3	3	2	1	1	1	1	1	2	4	4	4	3	4	1	1	2	1	1	3	2
949	1	1	0	3	0	2	9	1	0	2	0	1	1	0	3	0	2	9	1	0	2	0	4	2	2	1	1	0	1	1	1	2	3	1	1	1	2	5	8	8	4	1	1	1
950	1	1	0	3	0	2	9	1	0	2	0	1	1	0	3	0	2	9	1	0	2	0	4	4	4	3	0	3	4	1	1	2	4	3	4	2	5	4	4	5	1	1	3	4
951	1	1	0	3	0	2	9	1	0	2	0	1	1	0	3	0	2	9	1	0	2	0	4	4	4	2	1	1	1	1	1	4	1	1	1	2	5	4	5	5	3	2	3	2
952	1	1	0	3	0	2	9	1	0	2	0	1	1	0	3	0	2	9	1	0	2	0	4	4	4	1	0	1	4	1	1	2	2	2	2	2	4	1	3	3	3	2	3	3
953	1	1	0	3	0	2	9	1	0	2	0	1	1	0	3	0	2	9	1	0	2	0	2	4	5	2	1	1	1	1	1	2	4	2	4	2	5	8	7	9	7	2	3	3
954	1	1	0	3	0	2	9	1	0	2	0	1	1	0	3	0	2	9	1	0	2	0	4	4	5	3	2	1	3	2	1	2	4	2	4	2	5	5	4	6	2	1	3	4
955	1	1	0	3	0	2	9	1	0	2	0	1	1	0	3	0	2	9	1	0	2	0	4	2	4	2	1	1	3	1	1	2	1	1	1	2	2	3	3	2	2	-8	3	4
956	1	1	0	3	0	2	9	1	0	2	0	1	1	0	3	0	2	9	1	0	2	0	2	3	5	2	1	1	1	1	1	2	2	2	3	1	5	4	4	4	4	2	1	2
957	1	1	0	3	0	2	9	1	0	2	0	1	1	0	3	0	2	9	1	0	2	0	4	2	4	2	1	1	3	1	1	4	1	1	1	3	5	5	3	7	2	1	2	1
958	1	1	0	3	0	2	9	1	0	2	0	1	1	0	3	0	2	9	1	0	2	0	2	2	4	2	1	1	1	1	1	2	4	4	4	2	4	5	4	5	2	1	3	3
959	1	1	0	3	0	2	9	1	0	2	0	1	1	0	3	0	2	9	1	0	2	0	4	1	4	2	1	1	4	1	1	2	3	2	4	2	4	5	4	7	3	2	3	2
960	1	1	0	3	0	2	9	1	0	2	2	1	1	0	3	0	2	9	1	0	2	2	2	1	3	2	1	1	1	1	1	2	5	3	5	4	3	5	10	5	1	2	3	-8
961	1	1	0	3	0	2	9	1	0	2	2	1	1	0	3	0	2	9	1	0	2	2	4	1	4	2	1	1	3	1	1	2	4	4	2	2	5	4	3	-8	2	1	3	5
962	1	1	0	3	0	2	9	1	0	2	2	1	1	0	3	0	2	9	1	0	2	2	2	1	4	2	1	1	5	1	1	1	1	1	1	2	4	3	3	3	1	1	3	4
963	1	1	0	3	0	2	9	1	0	2	2	1	1	0	3	0	2	9	1	0	2	2	3	2	4	2	1	1	3	1	1	4	4	4	4	4	-8	5	3	5	2	1	1	4
964	1	1	0	3	0	2	9	1	0	2	2	1	1	0	3	0	2	9	1	0	2	2	1	4	5	-2	-2	-2	1	1	1	2	5	1	5	1	5	8	9	8	6	1	3	1
965	1	1	0	3	0	2	9	1	0	2	2	1	1	0	3	0	2	9	1	0	2	2	3	2	4	2	1	1	1	1	1	2	2	3	2	3	2	5	5	-8	5	1	3	-8
966	1	1	0	3	0	2	9	1	0	2	2	1	1	0	3	0	2	9	1	0	2	2	5	2	4	2	0	2	3	1	1	2	4	2	4	1	5	6	10	6	2	1	3	4
967	1	1	0	3	0	2	9	1	0	2	2	1	1	0	3	0	2	9	1	0	2	2	2	5	5	1	1	0	1	1	3	2	5	1	1	1	5	5	1	6	7	1	2	1
968	1	1	0	3	0	2	9	1	0	2	2	1	1	0	3	0	2	9	1	0	2	2	3	4	4	2	1	1	3	1	3	2	2	4	2	2	2	7	6	8	7	2	1	2
969	1	1	0	3	0	2	9	1	0	2	2	1	1	0	3	0	2	9	1	0	2	2	2	3	4	2	0	2	1	1	3	2	4	3	1	1	5	5	5	5	5	3	1	5
970	1	1	0	3	0	2	9	1	0	2	2	1	1	0	3	0	2	9	1	0	2	2	2	3	4	2	1	1	2	1	1	2	2	2	2	2	4	5	7	8	8	2	3	4
971	1	1	0	3	0	2	9	1	0	2	2	1	1	0	3	0	2	9	1	0	2	2	-8	2	5	2	1	1	3	1	3	4	1	2	2	1	5	2	2	-8	5	2	3	-8
972	1	1	0	3	0	2	9	1	0	2	2	1	1	0	3	0	2	9	1	0	2	2	2	4	5	3	1	2	1	1	1	2	4	4	4	4	4	6	6	6	5	2	3	-8
973	1	1	0	3	0	2	9	1	0	2	2	1	1	0	3	0	2	9	1	0	2	2	4	2	5	2	1	1	3	1	3	2	1	1	4	1	5	1	1	4	1	1	3	5
974	1	1	0	3	0	2	9	1	0	2	2	1	1	0	3	0	2	9	1	0	2	2	5	3	3	2	1	1	3	1	1	2	2	1	1	1	5	5	-8	7	-8	-8	3	-8
975	1	1	0	3	0	2	9	1	0	2	2	1	1	0	3	0	2	9	1	0	2	2	2	4	4	2	2	0	2	1	1	2	2	1	4	1	4	6	3	6	2	2	3	3
976	1	1	0	3	0	2	9	1	0	2	2	1	1	0	3	0	2	9	1	0	2	2	2	2	4	2	1	1	3	3	3	2	-8	2	4	2	4	5	4	7	4	2	3	-8
977	1	1	0	3	0	2	9	1	0	2	2	1	1	0	3	0	2	9	1	0	2	2	2	2	4	2	1	1	4	1	1	1	4	4	1	4	4	5	5	5	2	1	3	4
978	1	1	0	3	0	2	9	1	0	2	2	1	1	0	3	0	2	9	1	0	2	2	2	5	5	1	1	0	1	1	1	1	4	4	2	1	4	1	5	10	-8	2	3	2
979	1	1	0	3	0	2	9	1	0	2	2	1	1	0	3	0	2	9	1	0	2	2	1	1	5	2	1	1	1	1	-8	2	5	5	2	-8	5	4	1	6	1	1	3	5
980	1	1	0	3	0	2	9	1	0	2	2	1	1	0	3	0	2	9	1	0	2	2	2	2	5	2	1	1	3	2	1	2	3	4	4	1	3	5	4	5	4	2	3	-8
981	1	1	0	3	0	2	5	1	0	2	2	1	1	0	3	0	2	5	1	0	2	2	5	3	4	2	1	1	1	1	1	2	4	4	3	1	1	1	5	-8	5	1	3	1
982	1	1	0	3	0	2	5	1	0	2	2	1	1	0	3	0	2	5	1	0	2	2	3	2	4	1	97	97	3	3	3	2	4	2	4	2	3	4	-8	4	5	1	3	-8
983	1	1	1	3	0	2	5	1	0	2	2	1	1	1	3	0	2	5	1	0	2	2	4	4	5	2	1	1	1	1	1	2	4	4	4	4	4	5	4	5	5	1	3	2
984	1	1	1	3	0	2	5	1	0	2	2	1	1	1	3	0	2	5	1	0	2	2	4	3	4	2	1	1	3	1	3	2	1	1	5	1	5	5	5	9	3	2	3	4
985	1	1	1	3	0	2	5	1	0	2	2	1	1	1	3	0	2	5	1	0	2	2	2	4	4	2	1	1	3	1	1	2	2	2	4	2	5	5	7	8	6	2	3	2
986	1	1	1	3	0	2	5	1	0	2	2	1	1	1	3	0	2	5	1	0	2	2	2	2	4	2	1	1	1	1	2	2	4	2	4	2	5	4	5	6	7	2	3	4
987	1	1	1	3	0	2	5	1	0	2	2	1	1	1	3	0	2	5	1	0	2	2	2	2	3	0	0	0	2	1	1	4	2	2	2	1	4	1	1	2	1	1	3	2
988	1	1	1	3	0	2	5	1	0	2	2	1	1	1	3	0	2	5	1	0	2	2	3	2	5	2	1	1	1	1	1	4	1	5	1	1	5	2	2	1	1	1	3	3
989	1	1	1	3	0	2	5	1	0	2	2	1	1	1	3	0	2	5	1	0	2	2	3	4	5	2	1	1	3	1	1	2	3	3	4	1	4	6	5	8	2	1	3	4
990	1	1	1	3	0	2	5	1	0	2	2	1	1	1	3	0	2	5	1	0	2	2	4	1	3	2	0	2	1	1	1	2	5	5	5	5	4	4	2	5	5	1	3	2
991	1	1	1	3	0	2	5	1	0	2	2	1	1	1	3	0	2	5	1	0	2	2	2	2	4	1	0	1	-8	1	1	2	2	2	4	1	4	5	4	9	5	1	-8	2
992	1	1	1	3	0	2	5	1	0	2	2	1	1	1	3	0	2	5	1	0	2	2	2	4	4	2	1	1	2	3	1	2	4	3	2	2	4	3	1	4	2	1	3	4
993	1	1	1	3	0	2	5	1	0	2	2	1	1	1	3	0	2	5	1	0	2	2	3	4	5	2	1	1	3	1	1	2	4	-8	-8	2	4	4	3	5	4	-8	-8	-8
994	1	1	1	3	0	2	5	1	0	2	2	1	1	1	3	0	2	5	1	0	2	2	4	2	5	4	1	3	1	1	1	1	4	4	4	4	5	4	3	4	4	1	3	4
995	1	1	1	3	0	2	5	1	0	2	2	1	1	1	3	0	2	5	1	0	2	2	2	2	3	2	1	1	2	1	2	2	3	2	4	2	4	6	3	7	6	1	3	2
996	1	1	1	3	0	2	5	1	0	2	2	1	1	1	3	0	2	5	1	0	2	2	2	4	5	3	1	2	3	1	-8	2	5	4	4	-8	2	2	1	4	1	3	3	3
997	1	1	1	3	0	2	5	1	0	2	2	1	1	1	3	0	2	5	1	0	2	2	4	1	5	3	1	2	2	2	1	1	2	2	4	1	2	1	1	-8	1	-8	3	3
998	1	1	1	3	0	2	5	1	0	2	2	1	1	1	3	0	2	5	1	0	2	2	2	1	4	2	1	1	1	1	1	1	5	5	4	1	4	2	1	1	1	1	3	2
999	1	1	1	3	0	2	5	1	0	2	2	1	1	1	3	0	2	5	1	0	2	2	4	3	3	2	1	1	1	1	3	2	4	4	2	2	4	5	5	5	5	2	3	2
1000	1	1	1	3	0	2	5	1	0	2	2	1	1	1	3	0	2	5	1	0	2	2	2	4	4	2	1	1	1	1	1	2	2	2	2	2	4	3	4	3	3	1	3	2
1001	1	1	1	3	0	2	5	1	0	2	2	1	1	1	3	0	2	5	1	0	2	2	3	4	4	1	0	1	1	1	1	1	4	3	-8	2	5	5	5	-8	5	2	1	3
1002	1	1	1	3	0	2	5	1	0	2	2	1	1	1	3	0	2	5	1	0	2	2	2	4	4	2	1	1	3	-8	3	2	2	3	2	1	3	3	2	9	2	2	2	2
1003	1	1	1	3	0	2	5	1	0	2	2	1	1	1	3	0	2	5	1	0	2	2	2	3	4	2	1	1	1	1	1	1	4	4	4	-8	4	3	1	5	1	1	3	4
1004	1	1	1	3	0	2	5	1	0	2	2	1	1	1	3	0	2	5	1	0	2	2	4	2	3	2	1	1	4	1	-8	2	4	4	4	2	4	3	2	4	1	2	3	2
1005	1	1	1	3	0	2	5	1	0	2	2	1	1	1	3	0	2	5	1	0	2	2	4	2	4	2	1	1	3	2	1	2	5	5	4	1	5	5	4	7	6	3	3	3
1006	1	1	1	3	0	2	5	1	0	2	2	1	1	1	3	0	2	5	1	0	2	2	4	4	4	2	2	0	2	1	-8	2	4	4	4	2	4	5	5	-8	1	1	3	2
1007	1	1	1	3	0	2	5	1	0	2	2	1	1	1	3	0	2	5	1	0	2	2	4	3	4	5	1	4	1	1	1	2	4	2	4	-8	3	5	4	-8	3	1	3	-8
1008	1	1	1	3	0	2	5	1	0	2	2	1	1	1	3	0	2	5	1	0	2	2	2	4	5	2	1	1	1	1	1	2	4	4	4	2	5	6	4	7	5	1	3	4
1009	1	1	1	3	0	2	5	1	0	2	2	1	1	1	3	0	2	5	1	0	2	2	4	4	5	2	0	2	3	1	1	2	2	2	4	1	5	5	5	7	5	1	3	2
1010	1	1	1	3	0	2	5	1	0	2	2	1	1	1	3	0	2	5	1	0	2	2	2	4	4	1	1	0	1	2	-8	2	4	4	4	4	4	5	4	7	2	2	3	4
1011	1	1	1	3	0	2	5	1	0	2	2	1	1	1	3	0	2	5	1	0	2	2	2	4	4	2	1	1	2	1	1	2	4	2	2	1	5	6	6	6	3	1	3	4
1012	1	1	1	3	0	2	5	1	0	2	2	1	1	1	3	0	2	5	1	0	2	2	2	4	4	3	1	2	1	1	1	1	4	5	4	-8	5	3	5	2	1	1	3	-8
1013	1	1	1	3	0	2	5	1	0	2	2	1	1	1	3	0	2	5	1	0	2	2	4	2	2	1	0	0	1	1	3	1	4	2	4	2	5	1	1	1	1	1	3	3
1014	1	1	1	3	0	2	5	1	0	2	2	1	1	1	3	0	2	5	1	0	2	2	2	2	4	3	1	2	4	1	1	2	2	2	2	1	4	3	2	4	1	1	3	4
1015	1	1	1	3	0	2	5	1	0	2	2	1	1	1	3	0	2	5	1	0	2	2	4	4	4	2	1	1	1	1	1	4	4	2	2	2	5	6	5	5	4	1	1	2
1016	1	1	1	3	0	2	5	1	0	2	2	1	1	1	3	0	2	5	1	0	2	2	2	2	5	1	1	0	1	1	3	4	2	2	4	2	5	6	6	8	6	1	3	3
1017	1	1	1	3	0	2	5	1	0	2	2	1	1	1	3	0	2	5	1	0	2	2	2	4	5	4	2	2	1	1	-8	2	4	2	4	2	3	3	2	3	2	1	3	2
1018	1	1	1	3	0	2	5	1	0	2	2	1	1	1	3	0	2	5	1	0	2	2	2	3	4	2	0	2	1	1	1	2	5	1	1	2	5	2	1	5	2	-8	3	2
1019	1	1	1	3	0	2	5	1	0	2	2	1	1	1	3	0	2	5	1	0	2	2	1	5	5	3	0	3	1	1	1	2	5	5	5	5	5	6	5	6	3	1	3	5
1020	1	1	1	3	0	2	5	1	0	2	2	1	1	1	3	0	2	5	1	0	2	2	4	2	4	2	97	97	5	1	1	2	5	4	4	4	4	3	2	3	5	1	3	1
1021	1	1	1	3	0	2	5	1	0	2	2	1	1	1	3	0	2	5	1	0	2	2	3	4	4	2	0	2	1	1	3	4	4	2	3	1	5	5	1	6	3	2	3	3
1022	1	1	1	3	0	2	5	1	0	2	2	1	1	1	3	0	2	5	1	0	2	2	2	5	5	4	3	1	4	-8	3	4	4	4	4	4	4	5	5	5	3	1	3	-8
1023	1	1	1	3	0	2	5	1	0	2	2	1	1	1	3	0	2	5	1	0	2	2	2	2	4	2	1	1	1	1	1	2	2	2	4	2	4	1	1	1	1	1	1	-8
1024	1	1	1	3	0	2	5	1	0	2	2	1	1	1	3	0	2	5	1	0	2	2	2	3	4	2	97	97	4	4	1	4	2	2	4	4	5	4	4	6	4	1	3	2
1025	1	1	1	3	0	2	5	1	0	2	2	1	1	1	3	0	2	5	1	0	2	2	5	3	4	1	97	97	2	1	1	2	2	2	3	1	2	4	3	5	2	1	3	2
1026	1	1	1	3	0	2	5	1	0	2	2	1	1	1	3	0	2	5	1	0	2	2	2	4	4	2	1	1	3	1	1	1	3	2	4	1	5	6	5	7	5	2	3	4
1027	1	1	1	3	0	2	5	1	0	2	2	1	1	1	3	0	2	5	1	0	2	2	2	3	4	2	1	1	1	1	1	2	2	2	3	1	5	6	3	7	1	1	3	1
1028	1	1	1	3	0	2	5	1	0	2	2	1	1	1	3	0	2	5	1	0	2	2	4	3	4	1	0	1	5	2	5	2	4	4	4	1	4	6	6	7	6	2	3	5
1029	1	1	1	3	0	2	5	1	0	2	2	1	1	1	3	0	2	5	1	0	2	2	2	2	3	2	1	1	1	1	1	2	4	4	4	2	2	5	-8	-8	-8	2	3	2
1030	1	1	1	3	0	2	5	1	0	2	2	1	1	1	3	0	2	5	1	0	2	2	4	1	5	3	1	2	1	1	1	4	5	5	3	4	5	5	4	-8	2	2	3	4
1031	1	1	1	3	0	2	5	5	0	2	2	1	1	1	3	0	2	5	5	0	2	2	3	2	4	3	0	3	1	1	1	2	4	2	2	2	5	4	3	-8	3	1	1	-8
1032	1	1	1	3	0	2	5	5	0	2	2	1	1	1	3	0	2	5	5	0	2	2	5	2	2	2	1	1	1	1	1	2	3	2	5	3	2	1	1	7	1	2	2	-8
1033	1	1	1	3	0	2	5	5	0	2	2	1	1	1	3	0	2	5	5	0	2	2	2	3	4	2	1	1	3	3	1	2	2	2	4	2	3	4	3	5	3	1	3	3
1034	1	1	1	3	0	2	5	5	0	2	2	1	1	1	3	0	2	5	5	0	2	2	2	3	5	1	1	0	5	1	1	2	3	2	3	3	4	5	3	8	3	2	3	2
1035	1	1	1	3	0	2	5	5	0	2	2	1	1	1	3	0	2	5	5	0	2	2	2	4	5	2	1	1	4	1	2	1	4	3	3	2	2	4	3	5	2	1	1	1
1036	1	1	1	3	0	2	5	5	0	2	2	1	1	1	3	0	2	5	5	0	2	2	4	4	4	2	1	1	1	1	1	2	4	5	2	2	5	4	4	3	1	1	3	2
1037	1	1	1	3	0	2	5	5	0	2	2	1	1	1	3	0	2	5	5	0	2	2	2	4	4	-2	-2	-2	3	3	3	4	4	4	4	2	4	5	-8	-8	-8	2	2	2
1038	1	1	1	3	0	2	5	5	0	2	2	1	1	1	3	0	2	5	5	0	2	2	2	4	4	1	0	1	2	1	2	2	2	4	1	1	5	7	6	8	4	1	1	2
1039	1	1	1	3	0	2	5	5	0	2	2	1	1	1	3	0	2	5	5	0	2	2	2	4	4	1	0	1	3	1	1	2	4	3	2	2	4	5	4	6	5	1	3	3
1040	1	1	1	3	0	2	5	5	0	2	2	1	1	1	3	0	2	5	5	0	2	2	-8	5	5	2	1	1	5	1	1	2	4	1	4	1	5	6	5	7	1	2	-8	-8
1041	1	1	1	3	0	2	5	5	0	2	2	1	1	1	3	0	2	5	5	0	2	2	5	3	4	2	1	1	1	1	1	2	1	1	1	1	5	4	4	6	6	1	3	2
1042	1	1	1	3	0	2	5	5	0	2	2	1	1	1	3	0	2	5	5	0	2	2	4	2	4	2	1	1	3	1	1	2	4	2	3	2	2	4	4	-8	4	2	1	4
1043	1	1	1	3	0	2	5	5	0	2	2	1	1	1	3	0	2	5	5	0	2	2	2	3	5	2	1	1	1	1	1	2	2	2	2	1	5	2	1	7	6	2	3	4
1044	1	1	1	3	0	2	5	5	0	2	2	1	1	1	3	0	2	5	5	0	2	2	2	4	5	2	1	1	1	1	1	2	4	2	2	2	4	5	4	6	1	2	3	-8
1045	1	1	1	3	0	2	5	5	0	2	2	1	1	1	3	0	2	5	5	0	2	2	2	4	3	2	0	2	1	1	1	2	2	5	4	1	5	7	5	5	4	1	3	3
1046	1	1	1	3	0	2	5	5	0	2	2	1	1	1	3	0	2	5	5	0	2	2	3	2	2	3	1	2	1	1	1	2	4	3	2	2	4	4	3	3	2	-8	3	2
1047	1	1	1	3	0	2	5	5	0	2	2	1	1	1	3	0	2	5	5	0	2	2	2	4	2	6	1	5	1	1	1	2	4	4	2	2	5	4	3	5	2	1	3	4
1048	1	1	1	3	0	2	5	5	0	2	2	1	1	1	3	0	2	5	5	0	2	2	4	2	5	1	97	97	1	1	1	2	1	1	2	1	4	6	6	7	7	1	3	3
1049	1	1	1	3	0	2	5	5	0	2	2	1	1	1	3	0	2	5	5	0	2	2	2	4	5	2	1	1	1	1	1	2	4	4	4	4	4	5	5	5	6	1	3	2
1050	1	1	1	3	0	2	5	5	0	2	2	1	1	1	3	0	2	5	5	0	2	2	2	3	4	2	0	2	5	1	1	2	3	2	4	3	4	4	3	8	1	1	3	3
1051	1	1	1	3	0	2	5	5	0	2	2	1	1	1	3	0	2	5	5	0	2	2	2	4	5	2	1	1	3	1	1	2	4	3	2	2	3	2	-8	-8	1	1	3	3
1052	1	1	1	3	0	2	5	5	0	2	2	1	1	1	3	0	2	5	5	0	2	2	5	3	5	2	0	2	1	1	1	2	4	5	5	4	5	4	4	5	2	2	3	5
1053	1	1	1	3	0	2	5	5	0	2	2	1	1	1	3	0	2	5	5	0	2	2	5	2	4	2	1	1	2	1	1	2	5	4	5	1	5	3	2	5	1	1	3	1
1054	1	1	1	3	0	2	5	5	0	2	2	1	1	1	3	0	2	5	5	0	2	2	4	3	4	2	1	1	2	1	1	2	4	4	4	4	4	4	5	6	6	-8	3	3
1055	1	1	1	3	0	2	5	5	0	2	2	1	1	1	3	0	2	5	5	0	2	2	4	3	3	2	1	1	1	1	1	4	4	4	4	2	4	3	3	5	5	1	3	2
1056	1	1	1	3	0	2	5	5	0	2	2	1	1	1	3	0	2	5	5	0	2	2	2	4	5	2	1	1	3	1	1	2	4	2	2	2	4	5	4	7	4	2	3	5
1057	1	1	1	3	0	2	5	5	0	2	2	1	1	1	3	0	2	5	5	0	2	2	2	4	4	4	1	3	1	1	1	4	2	2	2	2	4	7	5	7	2	1	3	2
1058	1	1	1	3	0	2	5	5	0	2	2	1	1	1	3	0	2	5	5	0	2	2	4	4	5	2	0	2	1	1	1	4	3	2	1	1	5	6	8	4	3	1	3	4
1059	1	1	1	3	0	2	5	5	0	2	2	1	1	1	3	0	2	5	5	0	2	2	2	4	5	2	1	1	1	1	1	2	4	4	4	4	-8	6	6	6	5	2	3	2
1060	1	1	1	3	0	2	5	5	0	2	2	1	1	1	3	0	2	5	5	0	2	2	2	3	4	2	97	97	1	1	1	1	4	2	2	2	4	6	4	7	4	1	3	4
1061	1	1	1	3	0	2	5	5	0	2	2	1	1	1	3	0	2	5	5	0	2	2	2	4	3	2	1	1	1	1	1	4	2	2	4	3	4	4	5	6	3	1	3	4
1062	1	1	1	3	0	2	5	5	0	2	2	1	1	1	3	0	2	5	5	0	2	2	2	2	2	-2	-2	-2	1	1	1	2	4	4	4	4	2	3	2	-8	1	1	3	4
1063	1	1	1	3	0	2	5	5	0	2	2	1	1	1	3	0	2	5	5	0	2	2	4	3	4	1	1	0	3	1	3	2	4	2	2	4	4	1	5	-8	2	2	3	2
1064	1	1	1	3	0	2	5	5	0	2	2	1	1	1	3	0	2	5	5	0	2	2	2	1	5	2	1	1	1	1	1	2	2	2	4	4	5	5	4	4	5	1	3	5
1065	1	1	1	3	0	2	5	5	0	2	2	1	1	1	3	0	2	5	5	0	2	2	4	5	5	2	1	1	1	1	1	2	5	5	2	1	5	5	5	-8	5	2	3	4
1066	1	1	1	3	0	2	5	5	0	2	2	1	1	1	3	0	2	5	5	0	2	2	3	1	5	1	97	97	3	1	1	2	4	5	5	1	2	5	5	-8	-8	3	3	2
1067	1	1	1	3	0	2	5	5	0	2	2	1	1	1	3	0	2	5	5	0	2	2	-8	-8	5	1	1	0	-8	-8	-8	2	4	2	4	2	2	10	10	10	10	2	3	2
1068	1	1	1	3	0	2	5	5	0	2	2	1	1	1	3	0	2	5	5	0	2	2	1	4	5	2	1	1	1	1	1	2	5	3	1	2	5	5	5	6	5	1	3	1
1069	1	1	1	3	0	2	5	5	0	2	2	1	1	1	3	0	2	5	5	0	2	2	4	4	3	2	1	1	1	1	1	4	4	1	2	2	4	7	5	9	5	2	3	4
1070	1	1	1	3	0	2	5	5	0	2	2	1	1	1	3	0	2	5	5	0	2	2	4	4	5	2	1	1	1	1	-8	2	4	4	2	2	4	5	3	6	3	2	3	2
1071	1	1	1	3	0	2	5	5	0	2	2	1	1	1	3	0	2	5	5	0	2	2	2	4	5	1	97	97	1	1	1	3	5	2	2	4	5	4	3	5	3	2	3	1
1072	1	1	1	3	0	2	5	4	0	2	2	1	1	1	3	0	2	5	4	0	2	2	4	2	3	2	97	97	1	1	1	1	5	2	2	2	5	5	5	5	3	1	1	5
1073	1	1	1	3	0	2	5	4	0	2	2	1	1	1	3	0	2	5	4	0	2	2	1	4	5	2	1	1	2	1	1	4	5	3	3	1	1	4	4	5	4	1	1	5
1074	1	1	1	3	0	2	5	4	0	2	2	1	1	1	3	0	2	5	4	0	2	2	2	5	5	1	1	0	1	1	1	1	4	4	3	2	4	5	7	4	3	2	3	4
1075	1	1	1	3	0	2	5	4	0	2	2	1	1	1	3	0	2	5	4	0	2	2	2	3	4	1	0	1	1	1	2	2	2	1	4	1	5	4	5	-8	8	1	3	1
1076	1	1	1	3	0	2	5	4	0	2	2	1	1	1	3	0	2	5	4	0	2	2	2	4	5	1	1	0	1	1	1	2	4	2	4	4	4	5	5	5	4	1	1	4
1077	1	1	1	3	0	2	5	4	0	2	2	1	1	1	3	0	2	5	4	0	2	2	2	4	4	2	1	1	1	1	1	3	4	4	2	2	3	5	4	5	2	1	3	-8
1078	1	1	1	3	0	2	5	4	0	2	2	1	1	1	3	0	2	5	4	0	2	2	3	2	4	2	1	1	1	1	1	4	4	2	2	4	5	5	4	6	5	2	3	2
1079	1	1	1	3	0	2	5	4	0	2	2	1	1	1	3	0	2	5	4	0	2	2	3	4	3	2	1	1	3	1	1	4	2	4	3	2	4	4	5	6	3	1	-8	3
1080	1	1	1	3	0	2	5	4	0	2	2	1	1	1	3	0	2	5	4	0	2	2	4	2	5	3	1	2	1	1	4	4	4	2	2	1	1	9	8	10	5	1	1	2
1081	1	1	1	3	0	2	5	4	0	2	2	1	1	1	3	0	2	5	4	0	2	2	2	5	5	2	1	1	1	1	1	2	5	4	4	4	4	6	6	8	5	1	3	1
1082	1	1	1	3	0	2	5	4	0	2	2	1	1	1	3	0	2	5	4	0	2	2	2	5	5	3	1	2	1	1	1	2	5	5	5	5	1	5	5	5	5	2	3	-8
1083	1	1	1	3	0	2	5	4	0	2	2	1	1	1	3	0	2	5	4	0	2	2	2	4	4	2	1	1	5	1	1	2	2	1	1	1	2	7	5	6	2	2	3	4
1084	1	1	1	3	0	2	5	4	0	2	2	1	1	1	3	0	2	5	4	0	2	2	4	1	3	2	1	1	1	1	1	2	4	4	4	3	4	3	3	4	2	1	3	5
1085	1	1	1	3	0	2	5	4	0	2	2	1	1	1	3	0	2	5	4	0	2	2	4	4	4	1	1	0	2	1	-8	4	4	3	4	3	4	5	5	5	5	1	3	3
1086	1	1	1	3	0	2	5	4	0	2	2	1	1	1	3	0	2	5	4	0	2	2	4	2	4	2	1	1	1	1	2	2	5	5	3	1	5	4	6	3	2	1	3	2
1087	1	1	1	3	0	2	5	4	0	2	2	1	1	1	3	0	2	5	4	0	2	2	4	4	4	2	1	1	3	3	3	2	2	2	4	2	3	5	4	-8	4	2	3	4
1088	1	1	1	3	0	2	5	4	0	2	2	1	1	1	3	0	2	5	4	0	2	2	2	4	5	2	1	1	1	1	1	2	4	4	4	2	4	7	7	8	8	1	3	2
1089	1	1	1	3	0	2	5	4	0	2	2	1	1	1	3	0	2	5	4	0	2	2	2	5	1	2	1	1	3	3	1	2	4	3	4	-8	4	2	1	1	1	2	3	2
1090	1	1	1	3	0	2	5	4	0	2	2	1	1	1	3	0	2	5	4	0	2	2	4	1	5	2	1	1	3	1	1	2	4	4	4	1	5	5	5	5	5	2	3	2
1091	1	1	1	3	0	2	5	4	0	2	2	1	1	1	3	0	2	5	4	0	2	2	4	2	4	2	1	1	3	1	3	2	1	3	4	2	5	5	5	5	5	1	3	2
1092	1	1	1	3	0	2	5	4	0	2	2	1	1	1	3	0	2	5	4	0	2	2	5	1	5	2	1	1	1	1	1	2	5	5	1	-8	5	5	2	6	1	1	3	-8
1093	1	1	1	3	0	2	5	4	0	2	2	1	1	1	3	0	2	5	4	0	2	2	4	3	4	2	0	2	3	1	1	2	4	4	4	1	4	5	1	4	5	1	3	2
1094	1	1	1	3	0	2	5	4	0	2	2	1	1	1	3	0	2	5	4	0	2	2	4	2	4	2	1	1	3	1	1	2	2	2	4	3	2	5	2	6	2	2	1	-8
1095	1	1	1	3	0	2	5	4	0	2	2	1	1	1	3	0	2	5	4	0	2	2	2	4	5	2	1	1	1	1	1	2	4	2	2	2	4	6	4	-8	4	1	1	2
1096	1	1	1	3	0	2	5	4	0	2	2	1	1	1	3	0	2	5	4	0	2	2	2	3	3	2	1	1	1	1	1	2	4	4	4	3	4	3	4	3	3	1	3	2
1097	1	1	1	3	0	2	5	4	0	2	2	1	1	1	3	0	2	5	4	0	2	2	3	3	5	2	97	97	1	1	1	4	2	2	2	2	4	5	3	8	3	2	3	3
1098	1	1	1	3	0	2	5	4	0	2	2	1	1	1	3	0	2	5	4	0	2	2	2	3	4	2	1	1	3	1	1	4	4	4	4	2	4	5	5	6	5	2	3	4
1099	1	1	1	3	0	2	5	4	0	2	2	1	1	1	3	0	2	5	4	0	2	2	1	4	5	2	1	1	1	1	1	2	1	1	1	1	5	6	4	6	4	1	3	1
1100	1	1	1	3	0	2	5	4	0	2	2	1	1	1	3	0	2	5	4	0	2	2	2	2	5	3	2	1	2	1	1	2	2	2	1	1	4	9	6	10	6	3	3	2
1101	1	1	1	3	0	2	5	4	0	2	2	1	1	1	3	0	2	5	4	0	2	2	3	4	4	2	1	1	3	1	3	2	3	2	2	1	5	6	4	6	6	3	1	2
1102	1	1	1	3	0	2	5	4	0	2	2	1	1	1	3	0	2	5	4	0	2	2	2	4	5	2	97	97	3	3	3	4	2	1	4	2	5	4	3	4	2	1	3	3
1103	1	1	1	3	0	2	5	4	0	2	2	1	1	1	3	0	2	5	4	0	2	2	2	1	4	0	0	0	3	1	1	4	1	3	4	1	5	5	5	4	3	1	3	3
1104	1	1	1	3	0	2	5	4	0	2	2	1	1	1	3	0	2	5	4	0	2	2	1	3	5	2	1	1	1	1	1	2	5	1	1	1	5	5	5	6	4	1	1	1
1105	1	1	1	3	0	2	5	4	0	2	2	1	1	1	3	0	2	5	4	0	2	2	2	2	5	2	1	1	1	1	1	2	4	2	-8	2	2	5	5	5	5	2	3	-8
1106	1	1	1	3	0	2	5	4	0	2	2	1	1	1	3	0	2	5	4	0	2	2	2	2	4	-2	-2	-2	1	1	1	3	4	4	4	2	4	3	3	3	2	1	3	2
1107	1	1	1	3	0	2	5	4	0	2	2	1	1	1	3	0	2	5	4	0	2	2	3	4	4	4	2	2	1	1	1	2	2	1	1	2	4	-8	-8	-8	-8	1	3	2
1108	1	1	1	3	0	2	5	4	0	2	2	1	1	1	3	0	2	5	4	0	2	2	4	4	4	2	1	1	1	1	1	2	2	2	2	1	4	4	2	7	4	1	3	2
1109	1	1	1	3	0	2	5	4	0	2	2	1	1	1	3	0	2	5	4	0	2	2	5	3	4	2	1	1	1	1	1	2	5	5	4	4	4	5	3	5	2	1	3	1
1110	1	1	1	3	0	2	5	4	0	2	2	1	1	1	3	0	2	5	4	0	2	2	2	3	4	2	1	1	1	1	1	2	2	2	3	2	4	1	1	3	1	2	3	2
1111	1	1	1	3	0	2	5	4	0	2	2	1	1	1	3	0	2	5	4	0	2	2	4	3	3	1	1	0	-8	1	1	2	1	4	1	1	1	2	3	4	6	1	3	-8
1112	1	1	1	3	0	2	5	4	0	2	2	1	1	1	3	0	2	5	4	0	2	2	3	4	4	1	1	0	1	1	1	2	4	4	1	1	4	5	3	7	2	1	3	4
1113	1	1	1	3	0	2	5	4	0	2	2	1	1	1	3	0	2	5	4	0	2	2	1	4	4	2	1	1	1	1	1	2	4	2	4	2	4	1	1	2	-8	1	3	4
1114	1	1	1	3	0	2	5	4	0	2	2	1	1	1	3	0	2	5	4	0	2	2	2	4	5	1	1	0	3	1	3	2	4	4	5	1	4	5	4	5	4	2	3	2
1115	1	1	1	3	0	2	5	4	0	2	2	1	1	1	3	0	2	5	4	0	2	2	3	3	5	2	1	1	2	1	1	2	5	1	1	1	5	5	4	6	8	1	3	2
1116	1	1	1	3	0	2	5	4	0	2	2	1	1	1	3	0	2	5	4	0	2	2	4	1	4	2	1	1	3	1	3	2	3	2	2	4	4	4	10	8	7	1	3	4
1117	1	1	1	3	0	2	5	4	0	2	2	1	1	1	3	0	2	5	4	0	2	2	4	3	4	2	1	1	5	3	1	1	5	1	5	1	3	3	2	-8	2	1	3	3
1118	1	1	1	3	0	2	5	4	0	2	2	1	1	1	3	0	2	5	4	0	2	2	2	5	4	2	1	1	1	1	1	2	5	4	2	1	5	5	1	5	1	1	3	2
1119	1	1	1	3	0	2	5	4	0	2	2	1	1	1	3	0	2	5	4	0	2	2	5	2	5	2	1	1	4	1	4	2	1	1	1	1	4	6	4	-8	3	1	3	1
1120	1	1	1	3	0	2	5	4	0	2	2	1	1	1	3	0	2	5	4	0	2	2	4	2	5	2	1	1	3	1	1	2	5	2	2	2	5	5	3	6	2	1	3	-8
1121	1	1	1	3	0	2	5	4	0	2	2	1	1	1	3	0	2	5	4	0	2	2	4	1	2	3	1	2	1	1	1	4	4	2	4	4	3	1	1	3	1	1	3	4
1122	1	1	1	3	0	2	5	4	0	2	2	1	1	1	3	0	2	5	4	0	2	2	4	-8	4	2	1	1	3	1	1	2	-8	2	3	-8	4	1	1	4	1	1	3	3
1123	1	1	1	3	0	2	5	4	0	2	2	1	1	1	3	0	2	5	4	0	2	2	4	2	3	2	1	1	1	1	3	2	2	2	4	2	4	6	3	8	2	1	3	5
1124	1	1	1	3	0	2	5	4	0	2	2	1	1	1	3	0	2	5	4	0	2	2	3	3	4	2	1	1	1	1	2	4	3	4	2	1	3	6	4	7	3	2	3	2
1125	1	1	1	3	0	2	5	4	0	2	2	1	1	1	3	0	2	5	4	0	2	2	1	2	5	2	1	1	1	1	3	2	2	2	2	1	4	5	8	4	10	1	3	3
1126	1	1	1	3	0	2	5	4	0	1	2	1	1	1	3	0	2	5	4	0	1	2	4	4	4	2	1	1	1	1	1	1	2	2	2	1	5	3	2	4	2	2	3	3
1509	1	1	1	3	0	2	5	4	0	1	2	1	1	1	3	0	2	5	4	0	1	2	3	1	5	2	1	1	4	3	2	2	4	2	2	4	3	6	4	5	2	2	3	1
1510	1	1	1	3	0	2	5	4	0	1	2	1	1	1	3	0	2	5	4	0	1	2	4	2	2	2	1	1	1	1	1	4	4	2	4	2	4	3	4	2	7	2	2	3
1511	1	1	1	3	0	2	5	4	0	1	2	1	1	1	3	0	2	5	4	0	1	2	4	3	4	2	0	2	1	1	1	2	2	2	4	2	5	4	7	1	1	1	1	2
1512	1	1	1	3	0	2	5	4	0	1	2	1	1	1	3	0	2	5	4	0	1	2	2	2	4	2	1	1	5	1	1	2	5	4	5	2	4	3	2	6	2	2	3	2
1513	1	1	1	3	0	2	5	4	0	1	2	1	1	1	3	0	2	5	4	0	1	2	4	4	4	2	1	1	2	1	1	3	4	4	4	2	4	5	4	5	3	2	2	2
1514	1	1	1	3	0	2	5	4	0	1	2	1	1	1	3	0	2	5	4	0	1	2	4	3	4	97	97	97	2	2	2	4	2	2	2	2	4	5	5	4	6	2	2	4
1515	1	1	1	3	0	2	5	4	0	1	2	1	1	1	3	0	2	5	4	0	1	2	2	4	5	1	1	0	1	1	1	2	4	2	2	1	5	5	5	6	3	1	3	3
1516	1	1	1	3	0	2	5	4	0	1	2	1	1	1	3	0	2	5	4	0	1	2	3	2	4	2	1	1	3	1	3	4	2	1	4	1	5	4	4	6	4	2	3	5
1517	1	1	1	3	0	2	5	4	0	1	2	1	1	1	3	0	2	5	4	0	1	2	2	4	4	3	1	2	1	1	1	4	2	2	-8	2	4	3	4	5	3	2	2	2
1518	1	1	1	3	0	2	5	4	0	1	2	1	1	1	3	0	2	5	4	0	1	2	3	4	4	2	1	1	3	2	3	2	4	4	3	3	4	4	3	5	3	2	3	4
1519	1	1	1	3	0	2	5	4	0	1	2	1	1	1	3	0	2	5	4	0	1	2	4	4	4	2	1	1	5	2	1	2	5	5	3	1	3	5	10	5	10	2	3	3
1520	1	1	1	3	0	2	5	4	0	1	2	1	1	1	3	0	2	5	4	0	1	2	4	2	4	1	0	1	4	4	2	4	2	2	3	2	4	5	3	8	2	1	3	4
1521	1	1	1	3	0	2	5	4	0	1	2	1	1	1	3	0	2	5	4	0	1	2	4	2	4	2	1	1	1	1	1	3	4	4	4	3	4	7	5	8	3	1	2	2
1522	1	1	1	3	0	2	5	4	0	1	2	1	1	1	3	0	2	5	4	0	1	2	5	3	4	1	97	97	1	1	1	2	2	5	3	3	5	5	5	5	5	2	1	2
1523	1	1	1	3	0	2	5	4	0	1	2	1	1	1	3	0	2	5	4	0	1	2	4	4	4	2	1	1	2	1	1	4	3	2	3	3	4	5	2	10	2	2	3	4
1524	1	1	1	3	0	2	5	4	0	1	2	1	1	1	3	0	2	5	4	0	1	2	2	4	4	2	1	1	1	1	1	2	2	2	2	2	4	5	5	5	4	2	3	1
1525	1	1	1	3	0	2	5	4	0	1	2	1	1	1	3	0	2	5	4	0	1	2	2	3	4	1	1	0	3	1	1	2	2	2	3	1	5	4	4	4	3	2	3	2
1526	1	1	1	3	0	2	5	4	0	1	2	1	1	1	3	0	2	5	4	0	1	2	3	4	3	2	1	1	1	2	1	4	4	2	3	2	5	4	4	4	4	2	2	2
1527	1	1	1	3	0	2	5	4	0	1	2	1	1	1	3	0	2	5	4	0	1	2	2	4	4	1	1	0	1	1	1	4	2	4	2	2	4	5	3	7	3	2	3	2
1528	1	1	1	3	0	2	5	4	0	1	2	1	1	1	3	0	2	5	4	0	1	2	2	2	4	1	0	1	1	1	1	1	2	2	2	1	5	2	2	2	2	2	3	2
1529	1	1	1	3	0	2	5	4	0	1	2	1	1	1	3	0	2	5	4	0	1	2	3	4	4	1	1	0	1	1	1	2	4	4	2	2	3	3	3	3	2	2	3	2
1530	1	1	1	3	0	2	5	4	0	1	2	1	1	1	3	0	2	5	4	0	1	2	4	2	3	1	1	0	1	1	1	3	3	2	4	2	3	3	3	2	2	2	3	4
1531	1	1	1	3	0	2	5	4	0	1	2	1	1	1	3	0	2	5	4	0	1	2	2	2	4	97	97	97	4	2	3	1	2	2	2	2	3	1	2	1	5	2	3	3
1532	1	1	1	3	0	2	5	4	0	1	2	1	1	1	3	0	2	5	4	0	1	2	4	4	3	1	1	0	2	2	2	3	4	4	3	3	3	2	5	2	1	2	3	4
1533	1	1	1	3	0	2	5	4	0	1	2	1	1	1	3	0	2	5	4	0	1	2	3	4	4	2	1	1	2	1	1	3	2	2	3	1	4	6	4	6	2	2	1	4
1534	1	1	1	3	0	2	5	4	0	1	2	1	1	1	3	0	2	5	4	0	1	2	4	4	4	1	1	0	2	2	1	2	4	4	4	3	4	3	5	2	5	2	2	4
1535	1	1	1	3	0	2	5	4	0	1	2	1	1	1	3	0	2	5	4	0	1	2	1	4	5	1	0	1	1	1	1	2	4	2	5	1	4	5	5	5	5	2	1	4
1536	1	1	1	3	0	2	5	4	0	1	2	1	1	1	3	0	2	5	4	0	1	2	2	4	4	2	1	1	3	1	1	2	4	2	4	2	5	5	3	7	5	2	1	2
1537	1	1	1	3	0	2	5	4	0	1	2	1	1	1	3	0	2	5	4	0	1	2	4	3	4	2	1	1	3	1	1	4	2	2	3	2	4	1	1	1	1	2	3	3
1538	1	1	1	3	0	2	5	4	0	1	2	1	1	1	3	0	2	5	4	0	1	2	2	2	4	2	1	1	1	1	1	4	2	4	3	2	4	5	5	6	5	2	3	2
1539	1	1	1	3	0	2	5	4	0	1	2	1	1	1	3	0	2	5	4	0	1	2	4	4	4	4	1	3	2	1	1	3	3	5	4	3	5	5	1	7	1	1	3	1
1540	1	1	1	3	0	2	5	4	0	1	2	1	1	1	3	0	2	5	4	0	1	2	2	4	2	2	1	1	3	4	1	2	2	4	4	3	3	3	3	5	1	2	3	2
1541	1	1	1	3	0	2	5	4	0	1	2	1	1	1	3	0	2	5	4	0	1	2	3	4	4	2	1	1	5	2	3	4	1	1	1	1	5	7	9	8	9	2	1	5
1542	1	1	1	3	0	2	5	4	0	1	2	1	1	1	3	0	2	5	4	0	1	2	4	4	4	1	97	97	4	3	1	2	3	3	4	2	4	5	3	6	3	2	3	3
1543	1	1	1	3	0	2	5	4	0	1	2	1	1	1	3	0	2	5	4	0	1	2	5	4	4	2	1	1	2	2	1	2	4	2	3	3	4	7	5	9	5	2	3	2
1544	1	1	1	3	0	2	5	4	0	1	2	1	1	1	3	0	2	5	4	0	1	2	2	3	4	2	1	1	1	1	1	1	3	4	3	2	3	5	5	5	5	2	3	2
1545	1	1	1	3	0	2	5	4	0	1	2	1	1	1	3	0	2	5	4	0	1	2	4	4	4	2	1	1	1	1	1	3	2	4	4	2	2	4	1	4	1	2	2	2
1546	1	1	1	3	0	2	5	4	0	1	2	1	1	1	3	0	2	5	4	0	1	2	3	2	3	1	0	0	1	1	1	4	4	2	5	1	4	1	1	1	1	2	3	2
1547	1	1	1	3	0	2	5	4	0	1	2	1	1	1	3	0	2	5	4	0	1	2	5	4	2	3	1	2	3	1	1	4	2	2	2	2	4	4	3	5	4	2	1	4
1548	1	1	1	3	0	2	5	4	0	1	2	1	1	1	3	0	2	5	4	0	1	2	4	4	4	3	1	2	2	2	2	3	4	3	4	3	3	5	5	5	3	1	3	4
1549	1	1	1	3	0	2	5	4	0	1	2	1	1	1	3	0	2	5	4	0	1	2	2	2	3	97	97	97	1	1	1	1	2	2	2	2	4	5	5	5	4	2	3	2
1550	1	1	1	3	0	2	5	4	0	1	2	1	1	1	3	0	2	5	4	0	1	2	2	3	4	2	1	1	1	1	1	2	4	2	4	2	4	4	5	4	3	2	3	1
1551	1	1	1	3	0	2	5	4	0	1	2	1	1	1	3	0	2	5	4	0	1	2	4	1	4	2	1	1	2	2	3	4	2	4	3	2	3	5	5	5	5	2	1	5
1552	1	1	1	3	0	1	5	4	0	1	2	1	1	1	3	0	1	5	4	0	1	2	3	4	4	0	0	0	1	1	1	2	4	2	3	2	4	4	1	5	1	2	3	2
1553	1	1	1	3	0	1	5	4	0	1	2	1	1	1	3	0	1	5	4	0	1	2	3	4	4	2	1	1	3	2	1	2	4	4	3	4	3	5	5	5	2	1	2	3
1554	1	1	1	3	0	1	5	4	0	1	2	1	1	1	3	0	1	5	4	0	1	2	5	3	4	0	0	0	1	1	1	2	4	3	4	4	4	1	1	1	1	2	3	2
1555	1	1	1	3	0	1	5	4	0	1	2	1	1	1	3	0	1	5	4	0	1	2	2	4	5	2	1	1	3	2	1	2	2	2	2	1	4	4	2	5	2	2	3	2
1556	1	1	1	3	0	1	5	4	0	1	2	1	1	1	3	0	1	5	4	0	1	2	3	4	5	3	2	1	3	1	1	1	2	2	2	2	4	5	5	5	2	1	2	2
1557	1	1	1	3	0	1	5	4	0	1	2	1	1	1	3	0	1	5	4	0	1	2	2	4	5	1	1	0	4	4	1	4	4	4	2	4	3	5	2	6	1	1	2	4
1558	1	1	1	3	0	1	5	4	0	1	2	1	1	1	3	0	1	5	4	0	1	2	3	3	4	2	1	1	3	1	1	4	4	2	2	4	5	4	4	5	6	2	3	2
1559	1	1	1	3	0	1	5	4	0	1	2	1	1	1	3	0	1	5	4	0	1	2	3	2	5	1	97	97	3	1	3	4	1	4	4	1	4	4	3	5	3	2	3	2
1560	1	1	1	3	0	1	5	4	0	1	2	1	1	1	3	0	1	5	4	0	1	2	4	1	4	2	97	97	1	1	1	2	2	2	4	2	2	4	2	4	5	2	2	2
1561	1	1	1	3	0	1	5	4	0	1	2	1	1	1	3	0	1	5	4	0	1	2	4	2	4	2	1	1	1	1	1	4	2	4	4	1	5	3	2	6	3	2	3	4
1562	1	1	1	3	0	1	5	4	0	1	2	1	1	1	3	0	1	5	4	0	1	2	2	4	4	2	1	1	1	1	1	2	2	2	2	2	4	5	3	6	3	2	3	2
1563	1	1	1	3	0	1	5	4	0	1	2	1	1	1	3	0	1	5	4	0	1	2	2	1	5	1	0	1	4	1	1	2	1	2	5	1	5	4	4	8	1	2	3	4
1564	1	1	1	3	0	1	5	4	0	1	2	1	1	1	3	0	1	5	4	0	1	2	2	2	4	2	1	1	1	1	1	4	1	4	2	1	3	5	4	6	2	1	3	3
1565	1	1	1	3	0	1	5	4	0	1	2	1	1	1	3	0	1	5	4	0	1	2	2	3	3	97	97	97	4	3	3	1	2	2	2	1	5	2	2	2	2	2	3	2
1566	1	1	1	3	0	1	5	4	0	1	2	1	1	1	3	0	1	5	4	0	1	2	2	4	4	0	0	0	3	3	3	1	4	4	4	2	4	1	1	1	1	2	3	4
1567	1	1	1	3	0	1	5	4	0	1	2	1	1	1	3	0	1	5	4	0	1	2	2	2	5	2	97	97	1	1	1	3	1	2	1	1	5	7	7	-8	1	3	3	3
1568	1	1	1	3	0	1	5	4	0	1	2	1	1	1	3	0	1	5	4	0	1	2	2	1	4	2	1	1	3	3	1	4	2	2	3	2	3	4	3	6	3	2	3	2
1569	1	1	1	3	0	1	5	4	0	1	2	1	1	1	3	0	1	5	4	0	1	2	2	4	4	2	1	1	5	1	3	2	5	5	3	2	4	3	1	5	1	2	3	2
1570	1	1	1	3	0	1	5	4	0	1	2	1	1	1	3	0	1	5	4	0	1	2	4	2	4	-2	-2	-2	5	3	3	2	5	2	2	1	5	4	2	5	2	2	3	2
1571	1	1	1	3	0	1	5	4	0	1	2	1	1	1	3	0	1	5	4	0	1	2	2	2	2	2	1	1	1	1	1	4	1	2	1	1	5	4	4	-8	1	2	1	4
1572	1	1	1	3	0	1	5	4	0	1	2	1	1	1	3	0	1	5	4	0	1	2	4	2	3	1	1	0	3	1	1	2	4	4	2	2	3	4	3	6	1	2	3	4
1573	1	1	1	3	0	1	5	4	0	1	2	1	1	1	3	0	1	5	4	0	1	2	3	2	3	1	0	1	3	2	3	3	2	2	3	2	4	2	2	3	2	2	3	3
1574	1	1	1	3	0	1	5	4	0	1	2	1	1	1	3	0	1	5	4	0	1	2	2	4	5	1	0	1	1	1	1	2	2	2	3	1	4	3	2	4	2	2	3	2
1575	1	1	1	3	0	1	5	4	0	1	2	1	1	1	3	0	1	5	4	0	1	2	2	3	4	1	0	1	2	1	2	2	1	2	1	2	4	5	4	6	7	2	1	3
1576	1	1	1	3	0	1	5	4	0	1	2	1	1	1	3	0	1	5	4	0	1	2	3	4	4	4	3	1	3	3	-8	2	5	4	4	3	4	5	2	7	1	1	3	2
1577	1	1	1	3	0	1	5	4	0	1	2	1	1	1	3	0	1	5	4	0	1	2	2	3	4	2	1	1	2	1	1	2	4	3	4	2	3	4	3	5	2	2	2	3
1578	1	1	1	3	0	1	5	4	0	1	2	1	1	1	3	0	1	5	4	0	1	2	4	1	4	2	1	1	1	1	3	2	1	1	4	1	5	3	5	4	5	2	3	4
1579	1	1	1	3	0	1	5	4	0	1	2	1	1	1	3	0	1	5	4	0	1	2	2	4	4	2	1	1	1	1	1	4	2	2	3	2	2	5	3	5	7	1	3	2
1580	1	1	1	3	0	1	5	4	0	1	2	1	1	1	3	0	1	5	4	0	1	2	4	2	5	2	1	1	2	1	1	3	4	4	3	2	3	7	6	8	3	2	3	3
1581	1	1	1	3	0	1	5	4	0	1	2	1	1	1	3	0	1	5	4	0	1	2	2	4	5	1	0	1	1	1	1	2	5	2	4	4	2	5	5	5	5	1	3	2
1582	1	1	1	3	0	1	5	4	0	1	2	1	1	1	3	0	1	5	4	0	1	2	4	4	4	1	1	0	1	1	1	2	2	2	3	1	3	1	1	2	2	2	3	3
1583	1	1	1	3	0	1	5	4	0	1	2	1	1	1	3	0	1	5	4	0	1	2	2	4	4	1	1	0	3	3	1	2	2	2	4	1	4	2	2	2	2	1	1	1
1584	1	1	1	3	0	1	5	4	0	1	2	1	1	1	3	0	1	5	4	0	1	2	4	1	5	1	1	0	1	1	1	2	1	2	3	2	4	6	7	5	1	2	3	3
1585	1	1	1	3	0	1	5	4	0	1	2	1	1	1	3	0	1	5	4	0	1	2	4	2	4	1	1	0	1	1	1	2	4	2	4	2	3	3	3	3	3	2	3	2
1586	1	1	1	3	0	1	1	4	0	1	2	1	1	1	3	0	1	1	4	0	1	2	3	4	5	1	1	0	3	2	3	3	4	3	2	2	2	4	2	5	1	3	3	4
1587	1	1	1	3	0	1	1	4	0	1	2	1	1	1	3	0	1	1	4	0	1	2	4	2	4	2	1	1	2	1	1	1	2	2	2	2	4	3	4	1	10	2	2	2
1588	1	1	1	3	0	1	1	4	0	1	2	1	1	1	3	0	1	1	4	0	1	2	3	4	4	2	1	1	2	2	2	2	4	4	2	2	4	6	3	7	3	2	3	2
1589	1	1	1	3	0	1	1	4	0	1	2	1	1	1	3	0	1	1	4	0	1	2	4	4	5	2	1	1	3	1	3	4	2	2	2	2	4	8	8	10	8	2	1	3
1590	1	1	1	3	0	1	1	4	0	1	2	1	1	1	3	0	1	1	4	0	1	2	2	3	4	2	1	1	4	4	1	4	2	2	2	1	4	4	4	5	5	2	3	2
1591	1	1	1	3	0	1	1	4	0	1	2	1	1	1	3	0	1	1	4	0	1	2	3	3	4	2	1	1	1	1	1	4	4	4	4	3	4	5	4	6	2	2	2	4
1592	1	1	1	3	0	1	1	4	0	1	2	1	1	1	3	0	1	1	4	0	1	2	4	1	4	1	1	0	3	1	1	2	4	3	4	2	4	5	5	7	7	2	3	2
1593	1	1	1	3	0	1	1	4	0	1	2	1	1	1	3	0	1	1	4	0	1	2	3	4	4	1	1	0	3	1	1	3	4	3	2	2	4	4	3	5	2	2	3	2
1594	1	1	1	3	0	1	1	4	0	1	2	1	1	1	3	0	1	1	4	0	1	2	4	4	4	2	1	1	3	2	3	4	4	4	3	3	4	5	3	8	3	2	1	2
1595	1	1	1	3	0	1	1	4	0	1	2	1	1	1	3	0	1	1	4	0	1	2	4	2	2	3	0	3	1	1	1	2	2	4	4	2	4	1	1	2	1	2	3	2
1596	1	1	1	3	0	1	1	4	0	1	2	1	1	1	3	0	1	1	4	0	1	2	2	4	4	2	1	1	2	1	1	3	2	2	3	2	4	5	5	4	5	2	3	3
1597	1	1	1	3	0	1	1	4	0	1	2	1	1	1	3	0	1	1	4	0	1	2	3	3	4	2	1	1	2	3	3	3	4	4	4	3	4	5	4	6	3	1	3	3
1598	1	1	1	3	0	1	1	4	0	1	2	1	1	1	3	0	1	1	4	0	1	2	2	4	4	2	1	1	1	1	1	2	2	2	4	1	5	5	5	5	5	2	3	2
1599	1	1	1	3	0	1	1	4	0	1	2	1	1	1	3	0	1	1	4	0	1	2	2	3	4	2	1	1	1	1	1	2	4	4	4	2	3	1	1	1	2	2	2	2
1600	1	1	1	3	0	1	1	4	0	1	2	1	1	1	3	0	1	1	4	0	1	2	5	3	5	1	97	97	3	1	2	2	5	3	2	2	3	5	5	5	2	2	3	5
1601	1	1	1	3	0	1	1	4	0	1	2	1	1	1	3	0	1	1	4	0	1	2	2	4	4	2	1	1	3	1	3	4	2	2	2	2	4	5	4	7	4	2	3	2
1602	1	1	1	3	0	1	1	4	0	1	2	1	1	1	3	0	1	1	4	0	1	2	2	4	4	97	97	97	1	1	1	2	2	2	3	2	4	5	5	5	4	2	3	2
1603	1	1	1	3	0	1	1	4	0	1	2	1	1	1	3	0	1	1	4	0	1	2	2	4	4	2	1	1	4	1	3	1	4	4	4	1	5	5	4	5	5	2	3	1
1604	1	1	1	3	0	1	1	4	0	1	2	1	1	1	3	0	1	1	4	0	1	2	3	4	4	2	1	1	2	1	2	3	2	1	3	1	4	2	2	4	2	2	3	2
1605	1	1	1	3	0	1	1	4	0	1	2	1	1	1	3	0	1	1	4	0	1	2	2	3	2	1	1	0	1	1	1	4	2	4	4	2	4	3	2	4	2	2	3	2
1606	1	1	1	3	0	1	1	4	0	1	2	1	1	1	3	0	1	1	4	0	1	2	5	3	4	2	1	1	1	1	1	2	4	5	3	1	4	1	1	1	1	1	3	3
1607	1	1	1	3	0	1	1	4	0	1	2	1	1	1	3	0	1	1	4	0	1	2	2	4	4	2	2	0	1	1	1	1	4	4	4	4	4	1	4	1	6	2	3	1
1608	1	1	1	3	0	1	1	4	0	1	2	1	1	1	3	0	1	1	4	0	1	2	3	4	2	2	97	97	1	1	1	2	5	4	4	3	4	1	1	1	5	2	3	2
1609	1	1	1	3	0	1	1	4	0	1	2	1	1	1	3	0	1	1	4	0	1	2	2	4	4	97	97	97	2	1	1	1	4	2	2	2	3	3	3	2	4	1	2	4
1610	1	1	1	3	0	1	1	4	0	1	2	1	1	1	3	0	1	1	4	0	1	2	3	4	4	2	1	1	1	1	1	4	4	3	3	3	3	5	3	5	3	2	3	2
1611	1	1	1	3	0	1	1	4	0	1	2	1	1	1	3	0	1	1	4	0	1	2	1	4	5	1	1	0	4	1	1	2	5	5	5	4	5	6	1	6	1	1	3	1
1612	1	1	1	3	0	1	1	4	0	1	2	1	1	1	3	0	1	1	4	0	1	2	4	4	5	1	1	0	3	3	1	2	2	2	3	1	5	5	3	5	1	2	3	2
1613	1	1	1	3	0	1	1	4	0	1	2	1	1	1	3	0	1	1	4	0	1	2	4	2	4	2	1	1	3	3	3	2	4	2	2	2	4	6	7	6	7	1	1	2
1614	1	1	1	3	0	1	1	4	0	1	2	1	1	1	3	0	1	1	4	0	1	2	4	4	4	2	1	1	4	1	3	2	2	2	4	1	5	4	2	6	2	2	3	4
1615	1	1	1	3	0	1	1	4	0	1	2	1	1	1	3	0	1	1	4	0	1	2	4	2	2	3	2	1	2	1	1	4	4	4	5	2	5	5	1	6	3	1	3	2
1616	1	1	1	3	0	1	1	4	0	1	2	1	1	1	3	0	1	1	4	0	1	2	4	4	2	1	0	1	3	1	1	1	2	2	3	2	3	1	6	1	7	2	3	3
1617	1	1	1	3	0	1	1	4	0	1	2	1	1	1	3	0	1	1	4	0	1	2	3	2	4	0	0	0	4	1	3	2	4	2	3	1	3	4	3	4	3	2	1	2
1618	1	1	1	3	0	1	1	4	0	1	2	1	1	1	3	0	1	1	4	0	1	2	1	4	5	2	1	1	2	2	2	1	1	1	4	2	2	3	2	3	1	1	2	2
1619	1	1	1	3	0	1	1	4	0	1	2	1	1	1	3	0	1	1	4	0	1	2	3	3	4	2	1	1	2	1	3	4	1	1	3	1	3	3	2	4	3	2	3	2
1620	1	1	1	3	0	1	1	4	0	1	2	1	1	1	3	0	1	1	4	0	1	2	4	4	4	3	2	1	1	1	1	1	4	3	4	2	3	6	5	7	2	1	2	2
1621	1	1	1	3	0	1	1	4	0	1	2	1	1	1	3	0	1	1	4	0	1	2	2	2	4	1	1	0	3	3	3	2	2	2	3	2	4	5	5	6	4	2	3	3
1622	1	1	1	3	0	1	1	4	0	1	2	1	1	1	3	0	1	1	4	0	1	2	4	4	5	2	1	1	1	1	1	4	2	2	3	1	4	4	4	5	3	2	2	4
1623	1	1	1	3	0	1	1	4	0	1	2	1	1	1	3	0	1	1	4	0	1	2	2	2	4	1	1	0	2	2	1	4	4	4	5	4	2	4	5	6	5	2	3	4
1624	1	1	1	3	0	1	1	4	0	1	2	1	1	1	3	0	1	1	4	0	1	2	2	4	4	2	1	1	3	4	4	2	2	3	3	2	4	7	6	7	7	2	1	4
1625	1	1	1	3	0	1	1	4	0	1	2	1	1	1	3	0	1	1	4	0	1	2	2	4	4	1	97	1	1	1	1	3	4	2	4	2	5	5	4	5	5	2	1	3
1626	1	1	1	3	0	1	1	4	0	1	2	1	1	1	3	0	1	1	4	0	1	2	4	4	4	1	97	97	3	1	1	4	4	2	4	2	2	3	2	7	2	2	3	1
1627	1	1	1	3	0	1	1	4	0	1	2	1	1	1	3	0	1	1	4	0	1	2	4	4	5	2	1	1	1	1	1	1	1	4	4	1	1	2	1	2	1	2	3	1
1628	1	1	1	3	0	1	1	4	0	1	2	1	1	1	3	0	1	1	4	0	1	2	4	2	4	1	0	1	1	4	1	2	1	4	1	1	4	8	8	8	3	2	1	4
1629	1	1	1	3	0	1	1	4	0	1	2	1	1	1	3	0	1	1	4	0	1	2	4	3	4	4	2	2	1	1	1	4	2	4	3	2	4	4	5	4	3	2	3	1
1630	1	1	1	3	0	1	1	4	0	1	2	1	1	1	3	0	1	1	4	0	1	2	1	4	4	1	1	0	1	1	1	2	2	2	2	1	3	5	5	5	5	2	2	1
1631	1	1	1	3	0	1	1	4	0	1	2	1	1	1	3	0	1	1	4	0	1	2	3	4	5	2	1	1	4	1	4	4	2	4	3	2	4	6	5	8	5	2	3	2
1632	1	1	1	3	0	1	1	4	0	1	2	1	1	1	3	0	1	1	4	0	1	2	2	4	4	1	0	1	1	1	1	4	4	2	2	2	4	5	3	7	3	2	3	3
1633	1	1	1	3	0	1	1	4	0	1	2	1	1	1	3	0	1	1	4	0	1	2	4	1	3	2	1	1	3	1	3	4	2	1	4	1	4	1	1	1	5	2	3	4
1634	1	1	1	3	0	1	1	4	0	1	2	1	1	1	3	0	1	1	4	0	1	2	2	4	5	1	0	1	4	1	1	4	5	3	3	3	5	8	5	8	3	2	3	4
1635	1	1	1	3	0	1	1	4	0	1	2	1	1	1	3	0	1	1	4	0	1	2	3	4	5	1	1	0	3	1	3	2	3	1	2	2	4	5	5	5	5	2	1	3
1636	1	1	1	3	0	1	1	4	0	1	2	1	1	1	3	0	1	1	4	0	1	2	2	4	5	2	1	1	3	1	3	1	3	1	1	1	5	8	8	8	5	1	2	2
1637	1	1	1	3	0	1	1	4	0	1	2	1	1	1	3	0	1	1	4	0	1	2	2	4	2	3	2	1	1	1	1	4	4	3	2	2	4	2	1	1	1	2	3	2
1638	1	1	1	3	0	1	1	4	0	1	2	1	1	1	3	0	1	1	4	0	1	2	4	3	4	2	1	1	3	1	1	3	2	2	4	2	3	5	5	6	5	3	1	3
1639	1	1	1	3	0	1	1	4	0	1	2	1	1	1	3	0	1	1	4	0	1	2	5	4	5	2	97	97	1	1	1	4	5	3	3	3	5	8	5	9	2	2	3	2
1640	1	1	1	3	0	1	1	4	0	1	2	1	1	1	3	0	1	1	4	0	1	2	2	4	4	1	0	1	1	1	1	4	2	1	1	1	4	5	3	5	1	2	1	4
1641	1	1	1	3	0	1	1	4	0	1	2	1	1	1	3	0	1	1	4	0	1	2	1	2	5	2	1	1	1	1	1	3	5	5	4	3	4	5	3	6	2	1	3	4
1642	1	1	1	3	0	1	1	4	0	1	2	1	1	1	3	0	1	1	4	0	1	2	3	2	4	2	1	1	1	1	2	4	2	2	4	2	5	4	4	5	4	2	3	2
1643	1	1	1	3	0	1	1	4	0	1	2	1	1	1	3	0	1	1	4	0	1	2	2	4	4	2	1	1	2	1	1	2	4	4	4	2	4	6	5	7	4	2	3	4
1644	1	1	1	3	0	1	1	4	0	1	2	1	1	1	3	0	1	1	4	0	1	2	3	3	4	97	97	97	2	1	3	2	4	3	2	2	4	6	6	6	5	1	3	2
1645	1	1	1	3	0	1	1	4	0	1	2	1	1	1	3	0	1	1	4	0	1	2	3	4	4	2	1	1	4	1	3	4	2	2	3	2	4	4	3	6	3	2	3	4
1646	1	1	1	3	0	1	1	4	0	1	2	1	1	1	3	0	1	1	4	0	1	2	2	4	5	-2	-2	-2	1	1	1	1	4	4	2	4	4	5	5	5	5	2	3	4
1647	1	1	1	3	0	1	1	4	0	1	2	1	1	1	3	0	1	1	4	0	1	2	2	4	4	2	1	1	4	1	3	2	2	2	2	2	4	5	3	7	3	2	3	4
1648	1	1	1	3	0	1	1	4	0	1	2	1	1	1	3	0	1	1	4	0	1	2	3	2	4	2	1	1	2	1	3	4	2	2	4	2	4	4	3	4	3	2	3	2
1649	1	1	1	3	0	1	1	4	0	1	2	1	1	1	3	0	1	1	4	0	1	2	2	4	4	1	0	1	1	1	1	1	1	1	5	1	4	4	3	5	1	1	3	2
1650	1	1	1	3	0	1	1	4	0	1	2	1	1	1	3	0	1	1	4	0	1	2	2	4	4	2	1	1	3	1	4	2	3	3	2	2	3	3	2	3	2	2	3	4
1651	1	1	1	3	0	1	1	4	0	1	2	1	1	1	3	0	1	1	4	0	1	2	2	4	4	97	97	97	4	1	3	2	2	4	2	2	3	2	3	4	3	2	3	2
1652	1	1	1	3	0	1	1	4	0	1	2	1	1	1	3	0	1	1	4	0	1	2	2	4	4	2	1	1	3	1	3	2	1	2	1	1	3	5	4	6	4	2	1	3
1653	1	1	1	3	0	1	1	4	0	1	2	1	1	1	3	0	1	1	4	0	1	2	4	3	4	2	1	1	1	1	1	2	4	4	3	3	2	4	4	5	2	2	2	3
1654	1	1	1	3	0	1	1	4	0	1	2	1	1	1	3	0	1	1	4	0	1	2	4	2	2	0	0	0	1	1	1	3	2	2	5	5	5	2	1	2	1	2	3	5
1655	1	1	1	3	0	1	1	4	0	1	2	1	1	1	3	0	1	1	4	0	1	2	3	4	5	2	1	1	3	1	1	2	2	2	2	2	5	5	4	6	5	2	3	2
1656	1	1	1	3	0	1	1	4	0	1	2	1	1	1	3	0	1	1	4	0	1	2	2	4	4	2	1	1	1	1	1	4	4	4	3	2	4	6	6	7	7	2	2	2
1657	1	1	1	3	0	1	1	4	0	1	2	1	1	1	3	0	1	1	4	0	1	2	4	4	4	2	1	1	1	1	1	2	5	5	5	1	5	6	6	7	3	2	2	1
1658	1	1	1	3	0	1	1	4	0	1	2	1	1	1	3	0	1	1	4	0	1	2	5	1	4	2	1	1	1	1	1	3	4	2	4	2	4	1	1	1	1	2	3	3
1659	1	1	1	3	0	1	1	4	0	1	2	1	1	1	3	0	1	1	4	0	1	2	3	2	4	1	0	1	2	1	3	4	1	1	3	1	5	6	3	7	5	2	1	5
1660	1	1	1	3	0	1	1	4	0	1	2	1	1	1	3	0	1	1	4	0	1	2	3	4	4	2	1	1	4	2	3	4	4	2	3	3	4	5	4	6	4	2	1	4
1661	1	1	1	3	0	1	1	4	0	1	2	1	1	1	3	0	1	1	4	0	1	2	2	4	4	0	0	0	1	1	1	2	4	4	2	2	4	7	7	7	7	1	3	3
1662	1	1	1	3	0	1	1	4	0	1	2	1	1	1	3	0	1	1	4	0	1	2	3	4	4	4	2	2	1	1	1	4	4	3	2	2	4	4	5	5	3	2	3	2
1663	1	1	1	3	0	1	1	1	0	1	2	1	1	1	3	0	1	1	1	0	1	2	2	3	4	1	0	1	3	1	1	3	4	4	3	2	4	2	1	10	1	2	3	2
1664	1	1	1	3	0	1	1	1	0	1	2	1	1	1	3	0	1	1	1	0	1	2	5	4	4	2	97	97	3	1	4	2	1	1	2	1	5	5	4	5	4	2	1	2
1665	1	1	1	3	0	1	1	1	0	1	2	1	1	1	3	0	1	1	1	0	1	2	3	2	4	2	0	2	3	3	2	4	3	4	4	3	2	3	4	5	5	2	3	4
1666	1	1	1	3	0	1	1	1	0	1	2	1	1	1	3	0	1	1	1	0	1	2	2	2	4	2	1	1	3	1	1	4	4	1	4	1	5	4	4	4	3	2	3	3
1667	1	1	1	3	0	1	1	1	0	0	2	1	1	1	3	0	1	1	1	0	0	2	2	4	4	1	97	97	1	1	3	4	3	3	2	2	3	5	5	5	5	2	1	2
1668	1	1	1	3	0	1	1	1	0	0	2	1	1	1	3	0	1	1	1	0	0	2	2	4	5	2	1	1	2	1	2	4	2	2	3	2	5	4	5	4	4	2	2	2
1669	1	1	1	3	0	1	1	1	0	0	2	1	1	1	3	0	1	1	1	0	0	2	2	3	4	1	97	97	1	1	1	2	4	4	1	3	2	5	4	6	2	1	3	2
1670	1	1	1	3	0	1	1	1	0	0	2	1	1	1	3	0	1	1	1	0	0	2	2	4	4	1	1	0	4	1	3	2	2	2	4	1	4	4	3	7	5	2	3	4
1671	1	1	1	3	0	1	1	1	0	0	2	1	1	1	3	0	1	1	1	0	0	2	3	4	4	97	97	97	3	2	2	4	2	4	3	2	4	6	6	8	6	2	3	4
1672	1	1	1	3	0	1	1	1	0	0	2	1	1	1	3	0	1	1	1	0	0	2	2	2	4	2	2	0	3	1	1	2	2	4	1	1	4	5	3	6	3	2	3	4
1673	1	1	1	3	0	1	1	1	0	0	2	1	1	1	3	0	1	1	1	0	0	2	2	4	4	2	1	1	2	1	1	4	1	1	1	1	3	5	5	5	2	2	2	1
1674	1	1	1	3	0	1	1	1	0	0	2	1	1	1	3	0	1	1	1	0	0	2	1	4	4	2	1	1	4	1	1	-8	2	2	3	1	3	1	5	3	5	2	3	2
1675	1	1	1	3	0	1	1	1	0	0	2	1	1	1	3	0	1	1	1	0	0	2	3	4	4	2	1	1	2	3	3	4	4	4	3	2	3	5	5	5	4	1	2	3
1676	1	1	1	3	0	1	1	1	0	0	2	1	1	1	3	0	1	1	1	0	0	2	2	4	4	2	1	1	4	4	4	3	3	2	3	3	4	4	5	6	2	2	3	1
1677	1	1	1	3	0	1	1	1	0	0	2	1	1	1	3	0	1	1	1	0	0	2	4	4	5	2	1	1	3	1	3	2	4	2	3	4	5	4	2	7	3	2	3	3
1678	1	1	1	3	0	1	1	1	0	0	2	1	1	1	3	0	1	1	1	0	0	2	3	2	5	3	1	2	1	1	1	1	5	2	4	1	5	5	5	6	5	2	3	1
1679	1	1	1	3	0	1	1	1	0	0	2	1	1	1	3	0	1	1	1	0	0	2	4	3	2	1	1	0	1	1	1	4	4	4	5	4	4	4	1	4	1	1	3	3
1680	1	1	1	3	0	1	1	1	0	0	2	1	1	1	3	0	1	1	1	0	0	2	4	4	4	2	1	1	2	1	1	1	2	2	3	2	5	5	5	6	5	1	3	3
1681	1	1	1	3	0	1	1	1	0	0	2	1	1	1	3	0	1	1	1	0	0	2	2	3	4	2	1	1	1	1	1	4	2	2	2	3	4	5	5	5	7	2	2	3
1682	1	1	1	3	0	1	1	1	0	0	2	1	1	1	3	0	1	1	1	0	0	2	2	3	5	2	1	1	1	1	1	2	1	2	1	1	2	3	2	4	1	2	3	4
1683	1	1	1	3	0	1	1	1	0	0	2	1	1	1	3	0	1	1	1	0	0	2	4	2	4	2	1	1	1	1	1	1	4	4	3	2	4	2	2	4	2	2	3	2
1684	1	1	1	3	0	1	1	1	0	0	2	1	1	1	3	0	1	1	1	0	0	2	4	1	2	1	1	0	1	1	1	4	1	1	5	1	3	1	1	1	1	2	3	1
1685	1	1	1	3	0	1	1	1	0	0	2	1	1	1	3	0	1	1	1	0	0	2	2	4	4	2	1	1	3	1	1	2	4	2	3	4	2	3	5	5	5	2	3	4
1686	1	1	1	3	0	1	1	1	0	0	2	1	1	1	3	0	1	1	1	0	0	2	4	4	5	2	1	1	3	1	2	3	4	2	3	2	2	5	3	5	4	1	2	3
1687	1	1	1	3	0	1	1	1	0	0	2	1	1	1	3	0	1	1	1	0	0	2	2	4	4	1	0	1	1	1	1	4	2	2	4	2	4	4	2	5	1	2	1	2
1688	1	1	1	3	0	1	1	1	0	0	2	1	1	1	3	0	1	1	1	0	0	2	2	4	3	0	0	0	3	1	3	4	2	2	4	2	3	4	3	5	3	2	3	5
1689	1	1	1	3	0	1	1	1	0	0	0	1	1	1	3	0	1	1	1	0	0	0	4	3	3	1	1	0	3	1	1	2	4	4	4	3	2	4	4	4	1	2	3	2
1690	1	1	1	3	0	1	1	1	0	0	0	1	1	1	3	0	1	1	1	0	0	0	2	2	2	2	1	1	3	1	1	1	2	4	2	2	4	3	3	3	1	2	3	4
1691	1	1	1	3	0	1	1	1	0	0	0	1	1	1	3	0	1	1	1	0	0	0	4	2	4	2	1	1	3	2	3	3	4	2	3	3	4	2	2	2	4	1	2	4
1692	1	1	1	3	0	1	1	1	0	0	0	1	1	1	3	0	1	1	1	0	0	0	2	4	4	2	1	1	1	1	1	1	4	4	4	4	3	4	2	6	1	3	3	2
1693	1	1	1	3	0	1	1	1	0	0	0	1	1	1	3	0	1	1	1	0	0	0	2	4	4	2	1	1	3	2	3	1	2	2	3	2	4	5	4	7	3	2	3	4
1694	1	1	1	3	0	1	1	1	0	0	0	1	1	1	3	0	1	1	1	0	0	0	2	1	5	1	1	0	3	3	3	2	4	3	4	1	3	4	1	7	5	1	1	3
1695	1	1	1	3	0	1	1	1	0	0	0	1	1	1	3	0	1	1	1	0	0	0	4	3	4	1	0	1	2	1	1	2	4	4	4	2	5	2	1	5	1	1	3	3
1696	1	1	1	3	0	1	1	1	0	0	0	1	1	1	3	0	1	1	1	0	0	0	3	4	4	2	1	1	1	1	1	1	4	4	2	2	4	3	1	6	1	2	3	3
1697	1	1	1	3	0	1	1	1	0	0	0	1	1	1	3	0	1	1	1	0	0	0	4	3	5	0	0	0	4	1	3	1	4	2	2	2	4	5	5	6	7	2	3	4
1698	1	1	1	3	0	1	1	1	0	0	0	1	1	1	3	0	1	1	1	0	0	0	4	2	2	2	1	1	2	2	2	1	2	2	2	2	4	1	1	2	5	1	2	4
1699	1	1	1	3	0	1	1	1	0	0	0	1	1	1	3	0	1	1	1	0	0	0	4	2	4	1	1	0	1	1	1	2	5	5	5	2	5	4	5	4	2	2	3	4
1700	1	1	1	3	0	1	1	1	0	0	0	1	1	1	3	0	1	1	1	0	0	0	2	3	4	1	97	97	3	1	3	2	2	4	2	2	3	3	3	2	1	2	1	3
1701	1	1	1	3	0	1	1	1	0	0	0	1	1	1	3	0	1	1	1	0	0	0	3	1	2	2	1	1	4	4	2	1	2	2	4	3	4	4	3	5	2	2	2	5
1702	1	1	1	3	0	1	1	1	0	0	0	1	1	1	3	0	1	1	1	0	0	0	3	4	4	2	1	1	2	2	2	2	4	4	4	3	3	3	2	4	2	2	3	3
1703	1	1	1	3	0	1	1	1	0	0	0	1	1	1	3	0	1	1	1	0	0	0	4	1	5	3	0	3	1	1	2	3	1	2	3	1	3	5	5	5	3	2	3	4
1704	1	1	1	3	0	1	1	1	0	0	0	1	1	1	3	0	1	1	1	0	0	0	2	4	5	2	1	1	1	1	1	1	2	2	1	1	5	4	4	4	4	1	1	2
1705	1	1	1	3	0	1	1	1	0	0	0	1	1	1	3	0	1	1	1	0	0	0	2	3	4	2	1	1	1	1	1	1	2	2	4	2	4	5	4	5	4	2	3	2
1706	1	1	1	3	0	1	1	1	0	0	0	1	1	1	3	0	1	1	1	0	0	0	2	2	2	4	2	2	1	1	1	2	2	4	3	1	4	2	2	2	1	2	3	2
1707	1	1	1	3	0	1	1	1	0	0	0	1	1	1	3	0	1	1	1	0	0	0	4	4	4	1	1	0	3	3	3	2	2	2	2	1	5	6	3	9	1	2	1	3
1708	1	1	1	3	0	1	1	1	0	0	2	1	1	1	3	0	1	1	1	0	0	2	4	4	4	1	1	0	2	1	1	4	4	4	1	1	4	2	2	1	2	2	3	3
1709	1	1	1	3	0	1	1	1	0	0	2	1	1	1	3	0	1	1	1	0	0	2	3	4	4	2	1	1	1	1	1	2	5	5	4	1	3	3	3	3	2	2	3	2
1710	1	1	1	3	0	1	1	1	0	0	2	1	1	1	3	0	1	1	1	0	0	2	3	2	4	2	1	1	4	2	1	1	4	2	2	2	4	4	3	5	2	2	3	2
1711	1	1	1	3	0	1	1	1	0	0	2	1	1	1	3	0	1	1	1	0	0	2	4	2	5	1	1	0	3	3	3	2	1	2	4	1	4	5	4	5	4	2	3	3
1712	1	1	1	3	0	1	1	1	0	0	2	1	1	1	3	0	1	1	1	0	0	2	4	1	4	1	0	1	3	2	1	2	1	1	1	1	5	10	10	10	1	1	1	1
1713	1	1	1	3	0	1	1	1	0	0	2	1	1	1	3	0	1	1	1	0	0	2	1	1	4	1	0	1	1	1	1	2	1	5	1	5	5	2	2	2	2	2	3	1
1714	1	1	1	3	0	1	1	1	0	0	2	1	1	1	3	0	1	1	1	0	0	2	2	4	4	2	1	1	3	1	1	2	4	4	3	2	4	2	1	4	1	1	3	4
1715	1	1	1	3	0	1	1	1	0	0	2	1	1	1	3	0	1	1	1	0	0	2	2	-8	4	2	1	1	1	1	1	2	2	4	-8	1	5	-8	5	7	5	3	-8	1
1716	1	1	1	3	0	1	1	1	0	0	2	1	1	1	3	0	1	1	1	0	0	2	2	2	4	2	1	1	4	1	1	4	2	2	2	2	3	5	3	7	5	2	3	2
1717	1	1	1	4	0	1	1	1	0	0	2	1	1	1	4	0	1	1	1	0	0	2	3	2	5	2	1	1	3	1	3	4	2	2	3	2	4	4	3	4	3	2	3	3
1718	1	1	1	4	0	1	1	1	0	0	2	1	1	1	4	0	1	1	1	0	0	2	4	4	4	1	1	0	1	1	1	4	4	4	2	3	2	3	3	2	3	1	3	1
1719	1	1	1	4	0	1	1	1	0	0	2	1	1	1	4	0	1	1	1	0	0	2	4	2	4	4	2	2	2	1	1	4	4	2	4	2	4	3	2	3	5	2	3	4
1720	1	1	1	4	0	1	1	1	0	0	2	1	1	1	4	0	1	1	1	0	0	2	3	2	4	2	1	1	2	1	3	4	2	2	4	2	4	4	3	4	3	2	3	2
1721	1	1	1	4	0	1	1	1	0	0	2	1	1	1	4	0	1	1	1	0	0	2	3	2	5	1	1	0	4	1	1	3	2	2	1	1	3	1	1	1	1	2	3	5
1722	1	1	1	4	0	1	1	1	0	0	2	1	1	1	4	0	1	1	1	0	0	2	2	3	4	1	0	1	2	1	1	2	4	4	4	2	4	2	2	3	2	2	3	2
1723	1	1	1	4	0	1	1	1	0	0	2	1	1	1	4	0	1	1	1	0	0	2	3	2	2	1	97	97	4	1	3	2	2	2	2	1	2	3	1	6	4	2	3	3
1724	1	1	1	4	0	1	1	1	0	0	2	1	1	1	4	0	1	1	1	0	0	2	2	3	4	0	0	0	1	1	1	3	4	1	4	1	5	5	6	5	7	1	3	4
1725	1	1	1	4	0	1	1	1	0	0	2	1	1	1	4	0	1	1	1	0	0	2	2	3	3	1	1	0	4	1	1	2	2	5	2	2	5	1	1	5	2	1	3	2
1726	1	1	1	4	0	1	1	1	0	0	2	1	1	1	4	0	1	1	1	0	0	2	5	1	5	1	0	1	1	1	3	4	5	1	5	1	5	8	5	10	7	2	3	1
1727	1	1	1	4	0	1	1	1	0	0	2	1	1	1	4	0	1	1	1	0	0	2	2	4	4	2	1	1	1	1	1	3	2	2	4	3	3	1	1	1	1	2	3	3
1728	1	1	1	4	0	1	1	1	0	0	2	1	1	1	4	0	1	1	1	0	0	2	2	2	4	2	1	1	1	1	1	3	4	2	2	2	4	3	3	3	2	2	3	4
1729	1	1	1	4	0	1	1	1	0	0	2	1	1	1	4	0	1	1	1	0	0	2	4	4	4	2	1	1	3	1	1	4	2	2	4	2	4	4	4	5	1	2	2	2
1730	1	1	1	4	0	1	1	1	0	0	2	1	1	1	4	0	1	1	1	0	0	2	3	3	4	2	1	1	1	1	1	3	4	4	3	4	3	5	4	5	2	2	2	4
1731	1	1	1	4	0	1	1	2	0	0	2	1	1	1	4	0	1	1	2	0	0	2	2	3	4	2	1	1	1	1	1	3	2	2	3	2	4	2	2	2	5	2	3	2
1732	1	1	1	4	0	1	1	2	0	0	2	1	1	1	4	0	1	1	2	0	0	2	3	2	4	1	1	0	2	1	1	2	2	2	4	2	4	4	2	6	2	2	3	3
1733	1	1	1	4	0	1	1	2	0	0	2	1	1	1	4	0	1	1	2	0	0	2	4	4	4	2	1	1	1	1	1	2	4	4	4	2	4	2	4	3	5	2	3	2
1734	1	1	1	4	0	1	1	2	0	0	2	1	1	1	4	0	1	1	2	0	0	2	3	2	3	2	1	1	1	1	1	4	2	2	4	2	4	3	4	3	3	2	3	2
1735	1	1	1	4	0	1	1	2	0	0	2	1	1	1	4	0	1	1	2	0	0	2	4	3	3	2	1	1	3	1	1	4	4	3	4	2	3	4	2	5	1	2	3	4
1736	1	1	1	4	0	1	1	2	0	0	2	1	1	1	4	0	1	1	2	0	0	2	2	3	5	6	3	3	4	2	3	2	2	2	2	2	4	4	3	5	2	2	3	1
1737	1	1	1	4	0	1	1	2	0	0	2	1	1	1	4	0	1	1	2	0	0	2	2	4	4	2	1	1	1	1	1	2	4	4	4	2	4	4	3	4	2	2	3	1
1738	1	1	1	4	0	1	1	2	0	0	2	1	1	1	4	0	1	1	2	0	0	2	2	4	3	2	1	1	1	1	1	-8	2	2	2	2	3	6	4	6	2	1	2	3
1739	1	1	1	4	0	1	1	2	0	0	2	1	1	1	4	0	1	1	2	0	0	2	2	4	4	2	1	1	4	4	3	4	3	2	1	2	4	4	2	5	1	2	3	4
1740	1	1	1	4	0	1	1	2	0	0	2	1	1	1	4	0	1	1	2	0	0	2	4	2	4	1	97	97	3	1	3	2	4	3	3	2	4	2	3	6	3	2	1	2
1741	1	1	1	4	0	1	1	2	0	0	2	1	1	1	4	0	1	1	2	0	0	2	4	3	4	2	1	1	2	1	1	4	1	1	4	1	3	3	2	5	2	2	3	3
1742	1	1	1	4	0	1	1	2	0	0	2	1	1	1	4	0	1	1	2	0	0	2	2	2	2	1	0	1	3	1	1	1	1	1	4	1	5	3	2	3	1	1	3	1
1743	1	1	1	4	0	1	1	2	0	0	2	1	1	1	4	0	1	1	2	0	0	2	2	2	4	97	97	97	3	2	2	1	2	2	2	2	4	3	5	5	5	2	2	4
1744	1	1	1	4	0	1	1	2	0	0	2	1	1	1	4	0	1	1	2	0	0	2	3	2	4	2	1	1	5	1	1	2	4	5	4	1	2	5	8	5	5	2	3	4
1745	1	1	1	4	0	1	1	2	0	0	2	1	1	1	4	0	1	1	2	0	0	2	4	4	4	2	1	1	2	1	1	4	3	3	3	2	3	3	2	4	2	2	3	2
1746	1	1	1	4	0	1	1	2	0	0	2	1	1	1	4	0	1	1	2	0	0	2	2	3	4	2	1	1	1	1	3	2	2	2	2	1	5	5	4	6	4	2	3	3
1747	1	1	1	4	0	1	1	2	0	0	2	1	1	1	4	0	1	1	2	0	0	2	4	4	4	2	97	97	4	3	3	1	1	4	3	1	4	5	3	7	1	2	3	4
1748	1	1	1	4	0	1	1	2	0	0	2	1	1	1	4	0	1	1	2	0	0	2	4	2	4	3	2	1	1	1	1	3	4	4	4	4	4	5	2	7	1	2	3	2
1749	1	1	1	4	0	1	1	2	0	0	2	1	1	1	4	0	1	1	2	0	0	2	2	3	4	1	0	1	1	1	1	1	4	4	4	2	4	5	5	5	5	1	3	1
1750	1	1	1	4	0	1	1	2	0	0	2	1	1	1	4	0	1	1	2	0	0	2	4	1	5	1	1	0	1	1	3	3	2	2	2	1	4	4	5	6	5	2	3	1
1751	1	1	1	4	0	1	1	2	0	0	2	1	1	1	4	0	1	1	2	0	0	2	4	4	4	1	0	1	1	1	1	2	2	2	4	2	4	5	3	6	4	2	3	2
1752	1	1	1	4	0	1	1	2	0	0	2	1	1	1	4	0	1	1	2	0	0	2	3	4	4	2	1	1	2	2	2	4	1	1	2	1	3	6	5	8	5	2	3	4
1753	1	1	1	4	0	1	1	2	0	0	2	1	1	1	4	0	1	1	2	0	0	2	4	2	4	2	1	1	1	1	3	2	2	2	4	1	3	4	3	6	3	2	3	2
1754	1	1	1	4	0	1	1	2	0	0	2	1	1	1	4	0	1	1	2	0	0	2	4	2	4	1	0	1	5	2	2	1	3	2	3	2	4	3	2	4	3	2	3	4
1755	1	1	1	4	0	1	1	2	0	0	2	1	1	1	4	0	1	1	2	0	0	2	4	2	4	7	6	1	5	5	5	1	2	4	2	2	3	10	1	10	3	2	3	2
1756	1	1	1	4	0	1	1	2	0	0	2	1	1	1	4	0	1	1	2	0	0	2	4	3	4	2	1	1	3	1	2	4	4	4	1	3	4	4	1	8	5	2	3	2
1757	1	1	1	4	0	1	1	2	0	0	2	1	1	1	4	0	1	1	2	0	0	2	4	2	4	2	1	1	3	1	3	2	2	4	4	2	3	7	5	8	4	2	1	4
1758	1	1	1	4	0	1	1	2	0	0	2	1	1	1	4	0	1	1	2	0	0	2	4	3	4	3	1	2	1	1	1	2	2	2	2	2	4	4	1	5	1	3	1	2
1759	1	1	1	4	0	1	1	2	0	0	2	1	1	1	4	0	1	1	2	0	0	2	2	3	2	0	0	0	3	1	3	1	4	4	5	2	4	1	3	3	3	2	3	2
1760	1	1	1	4	0	1	1	2	0	0	2	1	1	1	4	0	1	1	2	0	0	2	2	4	4	1	0	1	4	1	3	2	4	4	3	2	4	3	2	4	2	2	3	5
1761	1	1	1	4	0	1	1	2	0	0	2	1	1	1	4	0	1	1	2	0	0	2	3	3	4	2	1	1	4	1	1	2	4	2	3	2	3	1	1	5	1	2	3	2
1762	1	1	1	4	0	1	1	2	0	0	2	1	1	1	4	0	1	1	2	0	0	2	4	2	3	1	0	1	2	2	2	4	1	2	3	4	5	2	2	3	2	2	3	3
1763	1	1	1	4	0	1	1	2	0	0	2	1	1	1	4	0	1	1	2	0	0	2	2	3	4	2	0	2	3	1	1	3	4	4	2	2	4	4	5	4	5	2	3	4
1764	1	1	1	4	0	1	1	2	0	0	2	1	1	1	4	0	1	1	2	0	0	2	2	4	5	2	1	1	3	1	3	4	2	1	5	4	5	4	2	7	2	1	3	3
1765	1	1	1	4	0	1	1	2	0	0	2	1	1	1	4	0	1	1	2	0	0	2	3	4	5	1	0	1	3	1	1	3	2	4	3	2	4	6	7	6	1	1	3	2
1766	1	1	1	4	0	1	1	2	0	0	2	1	1	1	4	0	1	1	2	0	0	2	3	4	4	2	1	1	4	1	4	4	4	4	3	3	4	5	5	8	5	2	3	2
1767	1	1	1	4	0	1	1	2	0	0	2	1	1	1	4	0	1	1	2	0	0	2	2	2	4	2	1	1	1	1	1	1	2	2	3	1	4	6	2	5	1	1	3	3
1768	1	1	1	4	0	1	1	2	0	0	2	1	1	1	4	0	1	1	2	0	0	2	3	3	3	0	0	0	3	3	1	2	1	1	4	1	3	2	2	1	5	1	3	4
1769	1	1	1	4	0	1	1	2	0	0	2	1	1	1	4	0	1	1	2	0	0	2	2	3	4	0	0	0	3	1	1	2	2	2	2	1	5	2	1	2	2	1	3	3
1770	1	1	1	4	0	1	1	2	0	0	2	1	1	1	4	0	1	1	2	0	0	2	2	4	5	2	1	1	1	1	1	3	1	1	1	1	5	7	5	9	3	2	1	1
1771	1	1	1	4	0	1	1	2	0	0	2	1	1	1	4	0	1	1	2	0	0	2	4	4	5	5	3	2	1	1	3	2	2	1	1	1	5	2	2	2	1	2	3	5
1772	1	1	1	4	0	1	1	2	0	0	2	1	1	1	4	0	1	1	2	0	0	2	1	4	4	2	1	1	1	1	1	2	5	4	5	2	4	1	5	1	1	1	3	3
1773	1	1	1	4	0	1	1	2	0	0	2	1	1	1	4	0	1	1	2	0	0	2	5	3	4	0	0	0	3	1	4	4	1	1	4	1	1	5	5	8	5	2	3	3
1774	1	1	1	4	0	1	1	2	0	0	2	1	1	1	4	0	1	1	2	0	0	2	2	4	5	1	0	1	1	1	1	3	4	4	2	1	3	5	3	7	10	2	3	2
1775	1	1	1	4	0	1	1	2	0	0	2	1	1	1	4	0	1	1	2	0	0	2	2	3	4	3	0	3	1	1	1	4	3	4	3	2	4	2	2	2	2	1	1	3
1776	1	1	1	4	0	1	1	2	0	0	2	1	1	1	4	0	1	1	2	0	0	2	2	4	4	1	0	1	2	2	2	2	2	2	2	2	4	6	5	5	5	2	2	2
1777	1	1	1	4	0	1	1	2	0	0	2	1	1	1	4	0	1	1	2	0	0	2	2	2	4	2	1	1	3	3	2	1	4	2	3	4	4	5	4	5	5	2	3	2
1778	1	1	1	4	0	1	1	2	0	0	2	1	1	1	4	0	1	1	2	0	0	2	4	4	3	1	0	1	1	1	1	3	4	2	4	4	4	1	1	3	5	1	3	4
1779	1	1	1	4	0	1	1	2	0	0	2	1	1	1	4	0	1	1	2	0	0	2	3	2	4	2	1	1	3	2	1	2	4	3	3	2	3	3	3	5	3	2	1	3
1780	1	1	1	4	0	1	1	2	0	0	2	1	1	1	4	0	1	1	2	0	0	2	2	3	4	1	0	1	4	1	3	2	2	2	2	2	4	4	2	5	1	2	3	3
1781	1	1	1	4	0	1	1	2	0	0	2	1	1	1	4	0	1	1	2	0	0	2	2	4	4	2	1	1	1	1	3	3	4	5	4	2	4	6	5	6	3	2	2	2
1782	1	1	1	4	0	1	1	2	0	0	2	1	1	1	4	0	1	1	2	0	0	2	4	3	5	1	1	0	3	1	3	4	2	2	3	2	5	4	3	4	3	2	3	2
1783	1	1	1	4	0	1	1	2	0	0	2	1	1	1	4	0	1	1	2	0	0	2	2	2	5	2	1	1	1	1	1	3	5	1	1	3	4	3	1	-8	1	1	3	3
1784	1	1	1	4	0	1	1	2	0	0	2	1	1	1	4	0	1	1	2	0	0	2	2	4	5	2	1	1	3	1	1	3	1	1	1	1	5	6	2	8	2	2	3	2
1785	1	1	1	4	0	1	1	2	0	0	2	1	1	1	4	0	1	1	2	0	0	2	2	4	5	2	1	1	1	1	1	2	4	4	2	3	4	5	3	5	2	1	3	2
1786	1	1	1	4	0	1	1	2	0	0	2	1	1	1	4	0	1	1	2	0	0	2	4	2	3	0	0	0	4	1	4	1	4	3	3	3	2	2	2	4	1	2	3	2
1787	1	1	1	4	0	1	1	2	0	0	2	1	1	1	4	0	1	1	2	0	0	2	4	2	4	2	0	2	4	1	1	2	1	1	4	1	5	5	7	10	9	2	3	2
1788	1	1	1	4	0	1	1	2	0	0	2	1	1	1	4	0	1	1	2	0	0	2	3	2	4	2	1	1	2	1	2	1	2	1	4	2	4	1	1	1	1	1	3	3
1789	1	1	1	4	0	1	1	2	0	0	2	1	1	1	4	0	1	1	2	0	0	2	2	2	4	2	1	1	2	2	1	2	2	2	2	3	4	6	2	8	2	2	3	4
1790	1	1	1	4	0	1	1	2	0	0	2	1	1	1	4	0	1	1	2	0	0	2	2	4	4	2	1	1	1	1	3	4	2	4	2	2	3	4	3	5	3	2	3	2
1791	1	1	1	4	0	1	1	2	0	0	2	1	1	1	4	0	1	1	2	0	0	2	3	4	4	2	1	1	3	3	1	2	2	2	1	2	5	5	5	5	5	2	3	1
1792	1	1	1	4	0	1	1	2	0	0	2	1	1	1	4	0	1	1	2	0	0	2	2	4	4	1	0	1	1	1	4	4	1	1	2	1	4	4	8	5	5	2	3	1
1793	1	1	1	4	0	1	1	2	0	0	2	1	1	1	4	0	1	1	2	0	0	2	2	4	4	1	97	97	1	1	1	3	4	4	3	2	4	3	4	3	2	2	1	3
1794	1	1	1	4	0	1	1	2	0	0	2	1	1	1	4	0	1	1	2	0	0	2	2	4	4	1	1	0	1	1	1	2	1	2	1	1	4	8	8	8	5	2	3	2
1795	1	1	1	4	0	1	1	2	3	0	2	1	1	1	4	0	1	1	2	3	0	2	4	4	4	2	1	1	1	1	1	4	2	1	2	1	4	5	5	5	5	2	3	1
1796	1	1	1	4	0	1	1	2	3	0	2	1	1	1	4	0	1	1	2	3	0	2	3	3	4	2	1	1	3	1	1	2	3	3	3	3	3	5	4	6	2	2	3	5
1797	1	1	1	4	0	1	1	2	3	0	2	1	1	1	4	0	1	1	2	3	0	2	4	3	4	1	1	0	1	1	1	3	4	2	2	2	4	5	3	5	8	2	3	3
1798	1	1	1	4	0	1	1	2	3	0	2	1	1	1	4	0	1	1	2	3	0	2	2	2	4	2	1	1	1	1	1	3	4	4	5	2	4	8	2	4	5	2	3	2
1799	1	1	1	4	0	1	1	2	3	0	2	1	1	1	4	0	1	1	2	3	0	2	4	4	4	2	1	1	5	4	1	4	2	1	4	1	4	5	3	6	5	2	3	2
1800	1	1	1	4	0	1	1	2	3	0	2	1	1	1	4	0	1	1	2	3	0	2	3	4	4	2	97	97	1	1	1	2	2	2	2	1	5	6	6	6	4	2	1	2
1801	1	1	1	4	0	1	1	2	3	0	2	1	1	1	4	0	1	1	2	3	0	2	5	1	3	2	1	1	3	1	1	2	4	2	1	1	5	5	2	6	1	1	3	1
1802	1	1	1	4	0	1	1	2	3	0	2	1	1	1	4	0	1	1	2	3	0	2	4	4	4	2	1	1	1	1	1	2	5	5	4	5	4	1	1	1	1	2	3	4
1803	1	1	1	4	0	1	1	2	3	0	2	1	1	1	4	0	1	1	2	3	0	2	5	4	4	3	1	2	3	3	3	2	5	3	4	5	5	1	3	1	1	1	3	-8
1804	1	1	1	4	0	1	1	2	3	0	2	1	1	1	4	0	1	1	2	3	0	2	4	1	4	2	1	1	4	1	1	2	2	2	4	2	5	2	3	5	4	2	3	5
1805	1	1	1	4	0	1	1	2	3	0	2	1	1	1	4	0	1	1	2	3	0	2	4	2	4	2	1	1	1	1	1	2	5	2	5	5	4	6	3	6	5	2	3	1
1806	1	1	1	4	0	1	1	2	3	0	2	1	1	1	4	0	1	1	2	3	0	2	1	1	4	1	1	0	2	1	1	4	1	2	1	4	5	3	3	5	1	2	3	3
1807	1	1	1	4	0	1	1	2	3	0	2	1	1	1	4	0	1	1	2	3	0	2	2	2	4	2	1	1	1	1	1	2	2	2	2	1	4	5	5	7	6	2	3	3
1808	1	1	1	4	0	1	1	2	3	0	2	1	1	1	4	0	1	1	2	3	0	2	4	4	4	2	1	1	3	1	1	4	2	2	4	2	4	5	3	6	2	2	3	4
1809	1	1	1	4	0	1	1	2	3	0	2	1	1	1	4	0	1	1	2	3	0	2	4	2	2	2	1	1	1	1	1	1	4	4	4	4	3	3	3	3	3	2	3	4
1810	1	1	1	4	0	1	1	2	3	0	2	1	1	1	4	0	1	1	2	3	0	2	3	2	4	2	1	1	2	2	1	2	4	4	4	3	4	4	3	4	1	1	3	4
1811	1	1	1	4	0	1	1	2	3	0	2	1	1	1	4	0	1	1	2	3	0	2	3	4	4	1	0	1	3	1	3	2	4	2	1	1	5	5	8	1	10	1	3	3
1812	1	1	1	4	0	1	1	2	3	0	2	1	1	1	4	0	1	1	2	3	0	2	2	4	4	2	1	1	3	1	1	2	2	4	2	2	5	5	3	7	4	1	3	4
1813	1	1	1	4	0	1	1	2	3	0	2	1	1	1	4	0	1	1	2	3	0	2	2	5	3	1	0	1	1	1	1	2	4	4	4	3	2	8	8	10	7	2	3	2
1814	1	1	1	4	0	1	1	2	3	0	2	1	1	1	4	0	1	1	2	3	0	2	5	3	3	2	2	0	5	1	3	3	5	5	3	3	2	1	1	5	1	2	3	4
1815	1	1	1	4	0	1	1	2	3	0	2	1	1	1	4	0	1	1	2	3	0	2	2	3	2	1	1	0	3	3	1	1	2	2	2	2	3	3	4	4	3	2	3	2
1816	1	1	1	4	0	1	1	2	3	0	2	1	1	1	4	0	1	1	2	3	0	2	4	3	5	2	1	1	3	1	1	2	4	4	4	2	5	1	1	2	1	1	3	4
1817	1	1	1	4	0	1	1	2	3	0	2	1	1	1	4	0	1	1	2	3	0	2	2	4	4	1	1	0	3	1	3	4	1	1	3	1	5	1	1	1	1	2	3	5
1818	1	1	1	4	0	1	1	2	3	0	2	1	1	1	4	0	1	1	2	3	0	2	3	3	5	4	2	2	1	1	2	2	2	2	4	2	4	4	4	3	2	2	1	2
1819	1	1	1	4	0	1	1	2	3	0	2	1	1	1	4	0	1	1	2	3	0	2	2	-8	5	97	1	97	1	1	1	2	2	2	4	4	2	1	3	1	-8	2	3	-8
1820	1	1	1	4	0	1	1	2	3	0	2	1	1	1	4	0	1	1	2	3	0	2	3	2	4	2	1	1	2	1	3	3	4	2	4	1	4	5	5	5	7	2	2	2
1821	1	1	1	4	0	1	1	2	3	0	2	1	1	1	4	0	1	1	2	3	0	2	3	3	4	2	1	1	3	3	1	2	5	2	5	1	2	2	4	2	5	2	3	3
1822	1	1	1	4	0	1	1	2	3	0	2	1	1	1	4	0	1	1	2	3	0	2	2	4	4	2	1	1	3	2	3	4	2	2	2	2	4	5	3	7	4	2	3	4
1823	1	1	1	4	0	1	1	2	3	0	2	1	1	1	4	0	1	1	2	3	0	2	2	4	4	2	97	97	1	1	1	3	2	2	3	2	3	5	7	5	1	2	2	2
1824	1	1	1	4	0	1	1	2	3	0	2	1	1	1	4	0	1	1	2	3	0	2	3	4	4	1	1	0	3	3	2	2	2	4	3	2	3	5	5	7	5	2	3	2
1825	1	1	1	4	0	1	1	2	3	0	2	1	1	1	4	0	1	1	2	3	0	2	4	4	5	1	0	1	1	1	1	3	4	3	4	2	4	4	3	5	1	2	2	4
1826	1	1	1	4	0	1	1	2	3	0	2	1	1	1	4	0	1	1	2	3	0	2	5	3	5	2	1	1	1	1	1	3	1	2	2	2	5	3	5	5	2	1	3	1
1827	1	1	1	4	0	1	1	2	3	0	2	1	1	1	4	0	1	1	2	3	0	2	3	4	4	2	1	1	3	1	3	4	1	1	4	1	5	3	2	4	2	3	3	4
1828	1	1	1	4	0	1	1	2	3	0	2	1	1	1	4	0	1	1	2	3	0	2	2	2	5	1	0	1	3	1	3	1	1	1	1	1	4	5	3	6	1	3	3	3
1829	1	1	1	4	0	1	1	2	3	0	2	1	1	1	4	0	1	1	2	3	0	2	2	4	4	2	1	1	1	1	3	4	4	4	4	2	2	5	3	8	1	2	1	2
1830	1	1	1	4	0	1	1	2	3	0	2	1	1	1	4	0	1	1	2	3	0	2	2	3	4	2	1	1	3	2	2	4	4	2	2	2	4	6	6	8	8	2	2	4
1831	1	1	1	4	0	1	1	2	3	0	2	1	1	1	4	0	1	1	2	3	0	2	2	4	4	2	97	97	1	1	1	4	5	2	4	2	5	4	4	4	3	2	2	2
1832	1	1	1	4	0	1	1	2	3	0	2	1	1	1	4	0	1	1	2	3	0	2	4	1	5	3	2	0	1	1	1	2	2	2	2	2	2	5	5	6	5	1	3	1
1833	1	1	1	4	0	1	1	2	3	0	2	1	1	1	4	0	1	1	2	3	0	2	3	4	4	2	1	1	1	1	1	3	4	3	2	3	3	3	5	3	1	2	2	3
1834	1	1	1	4	0	1	1	2	3	0	2	1	1	1	4	0	1	1	2	3	0	2	2	4	5	2	1	1	1	1	1	3	4	2	3	2	5	5	4	5	3	2	2	2
1835	1	1	1	4	0	1	1	2	3	0	2	1	1	1	4	0	1	1	2	3	0	2	2	4	4	1	1	0	1	1	1	3	4	4	5	1	2	1	3	1	3	2	3	1
1836	1	1	1	4	0	1	1	2	3	0	2	1	1	1	4	0	1	1	2	3	0	2	4	4	4	2	1	1	1	1	2	2	5	5	2	5	1	1	1	1	1	1	3	1
1837	1	1	1	4	0	1	1	2	3	0	2	1	1	1	4	0	1	1	2	3	0	2	2	4	4	2	1	1	1	1	1	4	4	2	2	1	3	5	4	5	2	2	2	1
1838	1	1	1	4	0	1	1	2	3	0	2	1	1	1	4	0	1	1	2	3	0	2	2	2	4	-2	-2	-2	2	1	1	4	4	4	2	1	4	3	2	4	2	2	3	2
1839	1	1	1	4	0	1	1	2	3	0	2	1	1	1	4	0	1	1	2	3	0	2	2	4	4	1	0	1	4	2	2	2	4	4	2	2	4	7	5	9	6	2	3	2
1840	1	1	1	4	0	1	1	2	3	0	2	1	1	1	4	0	1	1	2	3	0	2	4	5	4	2	1	1	5	5	5	1	5	5	5	4	4	4	1	4	1	1	1	5
1841	1	1	1	4	0	1	1	2	3	0	2	1	1	1	4	0	1	1	2	3	0	2	4	2	4	2	1	1	4	1	4	2	1	2	1	1	5	3	2	8	2	1	3	4
1842	1	1	1	4	0	1	1	2	3	0	2	1	1	1	4	0	1	1	2	3	0	2	2	3	2	97	97	97	1	1	1	1	2	2	3	2	4	1	1	2	1	2	3	2
1843	1	1	1	4	0	1	1	2	3	0	2	1	1	1	4	0	1	1	2	3	0	2	3	3	4	2	1	1	1	1	1	3	4	3	2	2	4	5	4	5	3	1	3	3
1844	1	1	1	4	0	1	1	2	3	0	2	1	1	1	4	0	1	1	2	3	0	2	2	2	4	4	2	2	1	1	1	4	3	2	2	3	4	2	1	2	1	1	3	-8
1845	1	1	1	4	0	1	1	2	3	0	2	1	1	1	4	0	1	1	2	3	0	2	2	4	4	4	1	3	1	1	1	3	4	4	3	4	3	5	4	7	2	2	3	3
1846	1	1	1	4	0	1	1	2	3	0	2	1	1	1	4	0	1	1	2	3	0	2	3	3	4	2	1	1	1	1	1	4	2	2	3	1	3	4	5	3	2	2	1	1
1847	1	1	1	4	0	1	1	2	3	0	2	1	1	1	4	0	1	1	2	3	0	2	5	1	3	2	1	1	1	1	1	4	4	2	-8	2	4	2	3	5	1	2	3	3
1848	1	1	1	4	0	1	1	2	3	0	2	1	1	1	4	0	1	1	2	3	0	2	4	4	4	2	1	1	3	1	3	2	4	4	4	3	4	7	4	9	7	2	3	4
1849	1	1	1	4	0	1	1	2	3	0	2	1	1	1	4	0	1	1	2	3	0	2	3	1	1	0	0	0	1	1	1	4	3	3	3	3	3	1	1	2	1	1	3	3
1850	1	1	1	4	0	1	1	2	3	0	2	1	1	1	4	0	1	1	2	3	0	2	4	2	4	6	3	3	1	1	1	2	3	4	3	3	3	4	1	4	1	2	2	2
1851	1	1	1	4	0	1	1	2	3	0	2	1	1	1	4	0	1	1	2	3	0	2	3	4	5	1	1	0	2	1	1	3	4	4	3	2	4	5	5	5	3	2	1	3
1852	1	1	1	4	0	1	1	2	3	0	2	1	1	1	4	0	1	1	2	3	0	2	4	3	2	3	2	1	2	1	1	4	4	4	3	3	3	3	3	3	1	2	1	2
1853	1	1	1	4	0	1	1	2	3	0	2	1	1	1	4	0	1	1	2	3	0	2	4	2	4	1	0	1	1	1	1	4	2	1	4	1	1	1	1	2	3	2	3	1
1854	1	1	1	4	0	1	1	2	3	0	2	1	1	1	4	0	1	1	2	3	0	2	4	2	5	2	1	1	2	2	1	4	2	2	4	1	4	5	5	8	5	2	2	3
1855	1	1	1	4	0	1	1	2	3	0	2	1	1	1	4	0	1	1	2	3	0	2	2	3	5	2	1	1	1	1	1	2	4	2	4	2	4	3	2	4	2	1	3	3
1856	1	1	1	4	0	1	1	2	3	0	2	1	1	1	4	0	1	1	2	3	0	2	2	3	5	97	97	97	1	1	3	2	4	4	4	4	3	5	5	5	5	1	1	4
1857	1	1	1	4	0	1	1	2	3	0	2	1	1	1	4	0	1	1	2	3	0	2	2	3	5	2	1	1	3	1	1	2	2	4	2	1	5	5	4	6	6	2	3	2
1858	1	1	1	4	0	1	1	2	3	0	2	1	1	1	4	0	1	1	2	3	0	2	4	2	4	2	0	2	1	2	1	2	4	4	4	3	4	4	3	4	1	2	3	2
1859	1	1	1	4	0	1	1	2	3	0	2	1	1	1	4	0	1	1	2	3	0	2	3	2	4	2	1	1	1	1	1	2	4	3	4	1	5	3	3	4	1	2	3	4
1860	1	1	1	4	0	1	1	2	3	0	2	1	1	1	4	0	1	1	2	3	0	2	4	2	2	1	0	1	3	3	1	2	5	4	4	2	4	4	3	4	2	2	3	2
1861	1	1	1	4	0	1	1	2	3	0	2	1	1	1	4	0	1	1	2	3	0	2	2	3	4	2	1	1	2	1	1	2	4	2	1	1	5	6	6	8	6	2	3	2
1862	1	1	1	4	0	1	1	2	3	0	2	1	1	1	4	0	1	1	2	3	0	2	2	3	5	2	1	1	2	1	1	4	2	2	4	2	5	5	4	5	4	1	2	2
1863	1	1	1	4	0	1	1	2	3	0	2	1	1	1	4	0	1	1	2	3	0	2	3	4	5	1	1	0	1	1	1	4	3	4	4	2	4	1	1	1	1	1	3	2
1864	1	1	1	4	0	1	1	2	3	0	2	1	1	1	4	0	1	1	2	3	0	2	2	4	5	4	3	1	1	1	1	4	4	3	3	3	4	5	4	5	2	2	3	2
1865	1	1	1	4	0	1	1	2	3	0	2	1	1	1	4	0	1	1	2	3	0	2	4	4	4	2	1	1	4	2	4	2	4	2	2	2	4	5	5	5	3	2	3	2
1866	1	1	1	4	0	1	1	2	3	0	2	1	1	1	4	0	1	1	2	3	0	2	2	3	5	2	1	1	1	1	1	3	1	1	1	1	5	2	1	2	1	1	2	2
1867	1	1	1	4	0	1	1	2	3	0	2	1	1	1	4	0	1	1	2	3	0	2	4	3	4	4	2	2	1	1	3	3	2	4	1	1	3	5	5	5	7	2	1	1
1868	1	1	1	4	0	1	1	2	3	0	2	1	1	1	4	0	1	1	2	3	0	2	4	4	4	2	1	1	2	1	1	2	3	3	3	2	5	4	5	6	6	2	3	4
1869	1	1	1	4	0	1	1	2	3	0	2	1	1	1	4	0	1	1	2	3	0	2	4	4	5	2	1	1	1	1	1	4	2	2	2	2	5	6	5	7	5	2	3	2
1870	1	1	1	4	0	1	1	2	3	0	2	1	1	1	4	0	1	1	2	3	0	2	4	3	4	1	0	1	3	2	1	4	4	5	2	3	5	3	4	5	3	2	3	3
1871	1	1	1	4	0	1	1	2	3	0	2	1	1	1	4	0	1	1	2	3	0	2	2	4	5	2	1	1	1	1	1	2	5	4	4	3	4	3	3	2	1	1	2	1
1872	1	1	1	4	0	1	1	2	3	0	2	1	1	1	4	0	1	1	2	3	0	2	2	4	4	2	1	1	1	1	1	3	5	5	5	4	5	5	2	7	2	1	3	4
1873	1	1	1	4	0	1	1	2	3	0	2	1	1	1	4	0	1	1	2	3	0	2	3	4	4	97	97	97	1	1	1	3	3	2	3	1	2	4	5	-8	3	2	1	1
1874	1	1	1	4	0	1	1	2	3	0	2	1	1	1	4	0	1	1	2	3	0	2	4	4	4	0	0	0	3	1	1	2	4	4	3	3	3	4	4	4	4	2	3	2
1875	1	1	1	4	0	1	1	2	3	0	2	1	1	1	4	0	1	1	2	3	0	2	2	4	5	2	1	1	1	1	1	3	5	5	3	1	5	4	4	5	2	2	1	2
1876	1	1	1	4	0	1	1	2	3	0	2	1	1	1	4	0	1	1	2	3	0	2	2	2	5	2	1	1	4	1	3	4	2	1	2	2	4	7	7	8	7	2	3	2
1877	1	1	1	4	0	1	1	2	3	0	2	1	1	1	4	0	1	1	2	3	0	2	2	1	3	3	1	2	3	1	3	-8	4	4	5	2	5	1	4	1	1	2	-8	1
1878	1	1	1	4	0	1	1	2	3	0	2	1	1	1	4	0	1	1	2	3	0	2	2	4	4	1	0	1	3	1	2	4	4	2	3	2	4	2	2	3	2	2	3	2
1879	1	1	1	4	0	1	1	2	3	0	2	1	1	1	4	0	1	1	2	3	0	2	5	4	4	0	0	0	3	2	5	1	3	3	3	1	3	5	4	6	1	2	2	4
1880	1	1	1	4	0	1	1	2	3	0	2	1	1	1	4	0	1	1	2	3	0	2	2	2	4	1	1	0	2	1	1	2	4	3	2	2	4	3	3	7	2	2	3	4
1881	1	1	1	4	0	1	1	2	3	0	2	1	1	1	4	0	1	1	2	3	0	2	3	3	4	2	1	1	4	2	1	4	4	4	3	3	4	3	2	4	2	2	3	4
1882	1	1	1	4	0	1	1	2	3	0	2	1	1	1	4	0	1	1	2	3	0	2	4	3	4	2	1	1	1	1	2	2	1	1	4	1	5	5	3	4	1	2	1	4
1883	1	1	1	4	0	1	1	2	3	0	2	1	1	1	4	0	1	1	2	3	0	2	2	4	4	4	2	2	2	1	3	3	5	5	5	1	5	3	2	3	1	1	3	2
1884	1	1	1	4	0	1	1	2	3	0	2	1	1	1	4	0	1	1	2	3	0	2	4	4	4	2	0	2	3	3	3	3	4	5	2	2	2	3	2	3	5	1	3	2
1885	1	1	1	4	0	1	1	2	3	0	2	1	1	1	4	0	1	1	2	3	0	2	3	4	4	1	97	97	1	1	1	2	1	4	4	1	5	3	1	4	2	1	3	2
1886	1	1	1	4	0	1	1	2	3	0	2	1	1	1	4	0	1	1	2	3	0	2	2	4	5	2	1	1	1	1	1	4	4	4	3	2	4	6	4	7	3	2	3	2
1887	1	1	1	4	0	1	1	2	3	0	2	1	1	1	4	0	1	1	2	3	0	2	3	2	4	1	97	97	1	1	1	3	2	2	4	3	3	1	1	1	1	2	3	3
1888	1	1	1	4	0	1	1	2	3	0	2	1	1	1	4	0	1	1	2	3	0	2	5	4	3	2	1	1	3	1	1	2	2	2	5	2	5	5	6	6	3	1	3	5
1889	1	1	1	4	0	1	1	2	3	0	2	1	1	1	4	0	1	1	2	3	0	2	4	4	4	2	1	1	4	1	1	2	5	3	5	2	4	2	1	3	1	1	3	2
1890	1	1	1	4	0	1	1	2	3	0	2	1	1	1	4	0	1	1	2	3	0	2	2	4	4	2	1	1	1	1	1	2	4	4	4	2	4	7	7	7	2	2	3	4
1891	1	1	1	4	0	1	1	2	3	0	2	1	1	1	4	0	1	1	2	3	0	2	2	2	2	2	1	1	1	1	1	1	4	2	4	4	2	5	4	7	5	1	3	2
1892	1	1	1	4	0	1	1	2	3	0	2	1	1	1	4	0	1	1	2	3	0	2	3	4	4	3	97	97	2	4	2	2	2	2	2	2	4	3	1	5	1	2	3	4
1893	1	1	1	4	0	1	1	2	3	0	2	1	1	1	4	0	1	1	2	3	0	2	2	4	4	1	0	1	1	1	1	2	4	4	4	3	2	2	2	1	1	1	3	4
1894	1	1	1	4	0	1	1	2	3	0	2	1	1	1	4	0	1	1	2	3	0	2	4	2	2	2	1	1	3	1	3	2	2	2	3	2	3	2	2	4	1	1	3	3
1895	1	1	1	4	0	1	1	2	3	0	2	1	1	1	4	0	1	1	2	3	0	2	4	2	4	2	1	1	1	1	1	1	2	1	4	1	4	3	5	3	1	2	3	4
1896	1	1	1	4	0	1	1	2	3	0	2	1	1	1	4	0	1	1	2	3	0	2	4	2	4	2	2	0	3	1	1	2	4	4	3	2	4	7	6	8	6	2	3	4
1897	1	1	1	4	0	1	1	2	3	0	2	1	1	1	4	0	1	1	2	3	0	2	4	3	4	2	1	1	3	1	1	2	2	2	2	2	4	5	4	6	3	2	3	4
1898	1	1	1	4	0	1	1	2	3	0	2	1	1	1	4	0	1	1	2	3	0	2	4	2	3	2	1	1	2	1	1	3	4	4	4	2	3	5	5	6	2	1	3	3
1899	1	1	1	4	0	1	1	2	3	0	2	1	1	1	4	0	1	1	2	3	0	2	4	2	4	0	97	97	1	1	1	4	2	2	3	1	4	1	1	1	1	2	3	3
1900	1	1	1	4	0	1	1	2	3	0	2	1	1	1	4	0	1	1	2	3	0	2	3	4	4	1	1	0	1	1	1	2	2	2	3	2	4	2	2	2	2	1	3	2
1901	1	1	1	4	0	1	1	2	3	0	2	1	1	1	4	0	1	1	2	3	0	2	2	2	4	2	1	1	1	1	1	4	4	4	4	3	4	6	5	6	5	1	3	2
1902	1	1	1	4	0	1	1	2	3	0	2	1	1	1	4	0	1	1	2	3	0	2	3	4	5	2	1	1	1	1	1	2	4	3	4	4	3	5	2	5	2	1	3	2
1903	1	1	1	4	0	1	1	2	3	0	2	1	1	1	4	0	1	1	2	3	0	2	2	3	4	2	1	1	1	1	1	2	2	2	2	2	4	6	6	6	2	1	2	2
1904	1	1	1	4	0	1	1	2	3	0	2	1	1	1	4	0	1	1	2	3	0	2	2	4	4	1	97	97	1	1	1	4	4	3	3	3	4	5	4	6	2	1	3	2
1905	1	1	1	4	0	1	1	2	3	0	2	1	1	1	4	0	1	1	2	3	0	2	4	1	2	3	1	2	5	4	1	4	4	4	2	2	4	4	2	6	1	2	3	5
1906	1	1	1	4	0	1	1	2	3	0	2	1	1	1	4	0	1	1	2	3	0	2	4	4	5	2	1	1	1	1	1	2	4	2	4	3	4	5	4	6	4	2	3	2
1907	1	1	1	4	0	1	1	2	3	0	2	1	1	1	4	0	1	1	2	3	0	2	2	4	4	1	97	97	2	2	3	4	2	4	4	4	4	5	3	8	2	2	3	2
1908	1	1	1	4	0	1	1	2	3	0	2	1	1	1	4	0	1	1	2	3	0	2	2	5	5	1	0	1	1	1	1	2	5	5	5	4	5	10	10	10	10	1	3	2
1909	1	1	1	4	0	1	1	2	3	0	2	1	1	1	4	0	1	1	2	3	0	2	2	4	4	1	0	1	2	1	1	2	4	4	2	2	5	4	2	6	2	2	3	4
1910	1	1	1	4	0	1	1	2	3	0	2	1	1	1	4	0	1	1	2	3	0	2	4	4	3	0	0	0	2	1	1	4	3	2	3	3	3	2	3	2	3	2	3	2
1911	1	1	1	4	0	1	1	2	3	0	2	1	1	1	4	0	1	1	2	3	0	2	2	4	4	1	0	1	1	1	1	2	2	1	5	1	1	1	1	2	1	1	3	3
1912	1	1	1	4	0	1	1	2	3	0	2	1	1	1	4	0	1	1	2	3	0	2	4	3	4	2	1	1	2	2	3	1	4	4	4	4	4	1	1	1	1	1	3	4
1913	1	1	1	4	0	1	1	2	3	0	2	1	1	1	4	0	1	1	2	3	0	2	4	4	5	5	3	2	1	1	1	4	4	4	3	3	3	5	3	6	2	2	3	3
1914	1	1	1	4	0	1	1	2	3	0	2	1	1	1	4	0	1	1	2	3	0	2	3	3	4	2	1	1	1	1	1	4	4	4	3	4	3	3	4	4	3	2	3	3
1915	1	1	1	4	0	1	1	2	3	0	2	1	1	1	4	0	1	1	2	3	0	2	4	4	5	2	1	1	1	1	1	3	5	2	1	2	5	2	2	2	1	1	3	1
1916	1	1	1	4	0	1	1	2	3	0	2	1	1	1	4	0	1	1	2	3	0	2	2	3	1	-3	-3	-3	2	2	2	1	2	2	3	3	2	3	2	2	1	1	-8	3
1917	1	1	1	4	0	1	1	2	3	0	2	1	1	1	4	0	1	1	2	3	0	2	3	4	5	2	0	2	1	1	1	4	3	3	3	3	3	2	1	2	1	1	3	3
1918	1	1	1	4	0	1	1	2	3	0	2	1	1	1	4	0	1	1	2	3	0	2	4	4	4	2	1	1	3	1	1	1	5	5	2	4	4	3	3	3	3	2	2	4
1919	1	1	1	4	0	1	1	2	3	0	2	1	1	1	4	0	1	1	2	3	0	2	2	4	4	1	1	0	4	1	3	2	2	1	2	1	4	4	4	5	4	2	3	2
1920	1	1	1	4	0	1	1	2	3	0	2	1	1	1	4	0	1	1	2	3	0	2	2	4	4	4	1	3	1	1	1	2	4	4	4	2	4	6	5	6	4	2	1	2
1921	1	1	1	4	0	1	1	2	3	0	2	1	1	1	4	0	1	1	2	3	0	2	4	4	4	2	1	1	4	3	1	1	2	2	2	2	4	4	3	4	1	1	3	2
1922	1	1	1	4	0	1	1	2	3	0	2	1	1	1	4	0	1	1	2	3	0	2	4	3	4	1	0	1	1	1	1	1	4	4	4	4	4	5	4	5	4	2	3	3
1923	1	1	1	4	0	1	1	2	3	0	2	1	1	1	4	0	1	1	2	3	0	2	2	4	3	2	1	1	1	1	1	4	3	4	4	4	4	4	4	5	4	2	3	3
1924	1	1	1	4	0	1	1	2	3	0	2	1	1	1	4	0	1	1	2	3	0	2	2	2	5	2	97	97	1	1	1	2	2	2	2	2	4	5	5	7	5	2	3	2
1925	1	1	1	4	0	1	1	2	3	0	2	1	1	1	4	0	1	1	2	3	0	2	1	4	4	1	1	0	1	1	1	2	4	4	4	2	2	5	1	5	1	1	3	4
1926	1	1	1	4	0	1	1	2	3	0	2	1	1	1	4	0	1	1	2	3	0	2	1	2	5	5	1	4	1	1	1	2	5	5	5	2	2	2	5	-8	3	2	3	5
1927	1	1	1	4	0	1	1	2	3	0	2	1	1	1	4	0	1	1	2	3	0	2	2	4	4	2	1	1	3	1	1	4	1	1	1	1	2	6	4	7	4	2	1	5
1928	1	1	1	4	0	1	1	2	3	0	2	1	1	1	4	0	1	1	2	3	0	2	4	1	4	1	0	1	1	1	1	3	5	5	4	4	4	6	5	6	5	2	3	4
1929	1	1	1	4	0	1	1	2	3	0	2	1	1	1	4	0	1	1	2	3	0	2	4	4	4	2	1	1	-8	-8	-8	3	3	2	4	2	3	4	1	4	3	2	-8	4
1930	1	1	1	4	0	1	1	2	3	0	2	1	1	1	4	0	1	1	2	3	0	2	4	3	4	2	1	1	3	2	3	2	2	2	2	1	4	4	3	6	4	2	3	4
1931	1	1	1	4	0	1	1	2	3	0	2	1	1	1	4	0	1	1	2	3	0	2	5	2	2	2	1	1	2	2	1	1	2	2	4	2	2	1	2	3	2	1	3	4
1932	1	1	1	4	0	1	1	2	3	0	2	1	1	1	4	0	1	1	2	3	0	2	5	1	1	1	1	0	1	1	1	2	5	5	5	1	5	2	1	2	1	2	-8	1
1933	1	1	1	4	0	1	1	2	3	0	2	1	1	1	4	0	1	1	2	3	0	2	4	3	4	97	97	97	1	1	1	2	2	4	4	-8	1	4	4	6	5	2	3	4
1934	1	1	1	4	0	1	1	2	3	0	2	1	1	1	4	0	1	1	2	3	0	2	2	3	5	2	0	2	3	3	3	1	4	3	2	2	3	-8	-8	-8	-8	2	3	4
1935	1	1	1	4	0	1	1	2	3	0	2	1	1	1	4	0	1	1	2	3	0	2	3	3	3	1	1	0	2	2	-8	2	3	3	3	3	3	1	1	1	1	1	3	3
1936	1	1	1	4	0	1	1	2	3	0	2	1	1	1	4	0	1	1	2	3	0	2	2	4	5	2	1	1	1	1	1	4	1	1	1	1	5	5	5	5	5	2	3	1
1937	1	1	1	4	0	1	1	2	3	0	2	1	1	1	4	0	1	1	2	3	0	2	5	4	5	2	1	1	1	1	1	2	1	1	1	1	2	7	5	9	10	1	3	2
1938	1	1	1	4	0	1	1	2	3	0	2	1	1	1	4	0	1	1	2	3	0	2	4	4	4	2	1	1	1	1	1	4	2	2	2	2	4	5	3	5	2	2	3	2
1939	1	1	1	4	0	1	1	2	3	0	2	1	1	1	4	0	1	1	2	3	0	2	4	4	4	1	1	0	1	2	1	3	4	3	3	4	3	4	3	3	3	1	3	2
1940	1	1	1	4	0	1	1	2	3	0	2	1	1	1	4	0	1	1	2	3	0	2	4	2	4	2	1	1	1	1	1	2	5	4	5	2	4	7	5	8	5	1	3	2
1941	1	1	1	4	0	1	1	2	3	0	2	1	1	1	4	0	1	1	2	3	0	2	3	4	4	2	1	1	1	1	1	4	4	4	4	4	4	2	1	4	1	1	3	4
1942	1	1	1	4	0	1	1	2	3	0	2	1	1	1	4	0	1	1	2	3	0	2	4	2	4	3	2	1	1	1	1	2	2	2	2	2	4	5	4	5	2	1	2	1
1943	1	1	1	4	0	1	1	2	3	0	2	1	1	1	4	0	1	1	2	3	0	2	2	4	4	1	0	1	1	1	1	1	4	2	2	3	4	3	3	4	3	2	3	2
1944	1	1	1	4	0	1	1	2	3	0	2	1	1	1	4	0	1	1	2	3	0	2	3	3	4	2	1	1	1	1	3	2	2	2	2	2	4	5	5	5	4	1	3	3
1945	1	1	1	4	0	1	1	2	3	0	2	1	1	1	4	0	1	1	2	3	0	2	2	4	5	2	1	1	-8	-8	-8	1	4	4	4	3	3	4	2	4	1	1	3	4
1946	1	1	1	4	0	1	1	2	3	0	2	1	1	1	4	0	1	1	2	3	0	2	4	3	4	2	1	1	2	1	2	2	4	2	2	2	4	4	3	4	2	1	3	2
1947	1	1	1	4	0	1	1	2	3	0	2	1	1	1	4	0	1	1	2	3	0	2	2	2	4	1	1	0	3	1	1	2	4	4	4	4	4	5	3	6	3	2	2	2
1948	1	1	1	4	0	1	1	2	3	0	2	1	1	1	4	0	1	1	2	3	0	2	2	4	4	1	1	0	2	2	2	3	5	5	2	1	5	1	1	1	1	3	3	3
1949	1	1	1	4	0	1	1	2	3	0	2	1	1	1	4	0	1	1	2	3	0	2	4	4	5	1	1	0	3	3	3	2	1	1	2	1	5	5	5	6	4	2	3	1
1950	1	1	1	4	0	1	1	2	3	0	2	1	1	1	4	0	1	1	2	3	0	2	2	1	4	2	1	1	1	1	1	2	1	1	4	1	4	1	1	-8	1	2	1	-8
1951	1	1	1	4	0	1	1	2	3	0	2	1	1	1	4	0	1	1	2	3	0	2	5	1	3	2	1	1	1	1	1	1	5	5	1	1	5	1	1	1	1	2	2	1
1952	1	1	1	4	0	1	1	2	3	0	2	1	1	1	4	0	1	1	2	3	0	2	4	2	4	2	1	1	1	1	1	2	1	1	1	1	4	4	2	6	2	2	3	4
1953	1	1	1	4	0	1	1	2	3	0	2	1	1	1	4	0	1	1	2	3	0	2	2	4	2	3	2	1	2	2	1	4	4	4	4	4	4	3	3	3	3	2	3	2
1954	1	1	1	4	0	1	1	2	3	0	2	1	1	1	4	0	1	1	2	3	0	2	3	4	4	1	1	0	1	1	1	3	3	4	3	4	3	3	3	3	3	1	3	2
1955	1	1	1	4	0	1	1	2	3	0	2	1	1	1	4	0	1	1	2	3	0	2	4	3	4	2	1	1	1	1	1	3	4	3	4	4	2	3	1	1	2	1	3	2
1956	1	1	1	4	0	1	1	2	3	0	2	1	1	1	4	0	1	1	2	3	0	2	2	4	5	2	1	1	2	1	1	3	4	4	4	2	5	2	1	-8	1	1	3	-8
1957	1	1	1	4	0	1	1	2	3	0	2	1	1	1	4	0	1	1	2	3	0	2	4	4	4	1	97	97	1	1	1	2	2	1	4	1	5	5	1	3	1	1	2	2
1958	1	1	1	4	0	1	1	2	2	0	2	1	1	1	4	0	1	1	2	2	0	2	2	5	4	1	1	0	3	1	1	2	1	1	1	1	5	5	2	7	2	2	3	2
1959	1	1	1	4	0	1	1	2	2	0	2	1	1	1	4	0	1	1	2	2	0	2	2	5	5	2	1	1	1	1	1	4	4	3	4	2	4	5	6	4	4	1	3	4
1960	1	1	1	4	0	1	1	2	2	0	2	1	1	1	4	0	1	1	2	2	0	2	4	4	4	3	2	1	1	1	1	2	4	4	4	4	3	3	2	4	1	1	3	2
1961	1	1	1	4	0	1	1	2	2	0	2	1	1	1	4	0	1	1	2	2	0	2	4	4	4	1	1	0	1	1	1	2	4	4	4	4	2	4	3	5	4	1	3	2
1962	1	1	1	4	0	1	1	2	2	0	2	1	1	1	4	0	1	1	2	2	0	2	4	4	4	1	1	0	1	1	1	4	4	4	4	4	4	2	1	2	1	1	3	3
1963	1	1	1	4	0	1	1	2	2	0	2	1	1	1	4	0	1	1	2	2	0	2	3	4	4	4	2	2	-8	-8	-8	4	4	2	2	-8	5	-8	-8	-8	-8	1	3	2
1964	1	1	1	4	0	1	1	2	2	0	2	1	1	1	4	0	1	1	2	2	0	2	4	2	3	2	2	0	1	1	1	2	5	2	4	4	4	4	3	4	3	1	3	4
1965	1	1	1	4	0	1	1	2	2	0	2	1	1	1	4	0	1	1	2	2	0	2	3	2	4	1	0	1	3	1	1	4	2	2	1	2	4	5	2	8	4	2	3	4
1966	1	1	1	4	0	1	1	2	2	0	2	1	1	1	4	0	1	1	2	2	0	2	4	2	4	2	1	1	4	2	4	2	2	4	2	2	4	2	1	4	1	2	3	2
1967	1	1	1	4	0	1	1	2	2	0	2	1	1	1	4	0	1	1	2	2	0	2	3	3	4	1	97	97	1	1	1	3	3	3	4	4	5	5	5	5	5	2	2	2
1968	1	1	1	4	0	1	1	2	2	0	2	1	1	1	4	0	1	1	2	2	0	2	4	3	3	2	1	1	-8	-8	-8	3	4	3	4	2	3	3	1	4	1	2	2	3
1969	1	1	1	4	0	1	1	2	2	0	2	1	1	1	4	0	1	1	2	2	0	2	3	3	4	2	1	1	1	1	1	2	4	4	4	4	4	5	4	6	3	1	3	4
1970	1	1	1	4	0	1	1	2	2	0	2	1	1	1	4	0	1	1	2	2	0	2	2	4	4	2	1	1	1	1	1	4	1	1	1	3	5	7	4	9	5	2	3	3
1971	1	1	1	4	0	1	1	2	2	0	2	1	1	1	4	0	1	1	2	2	0	2	4	2	4	2	1	1	2	1	1	2	4	4	5	2	2	4	4	6	4	1	3	2
1972	1	1	1	4	0	1	1	2	2	0	2	1	1	1	4	0	1	1	2	2	0	2	4	3	5	2	1	1	1	1	3	4	2	2	4	2	5	5	4	8	4	2	3	2
1973	1	1	1	4	0	1	1	2	2	0	2	1	1	1	4	0	1	1	2	2	0	2	2	4	5	1	1	0	5	1	1	2	4	1	4	1	5	6	6	6	10	2	3	3
1974	1	1	1	4	0	1	1	2	2	0	2	1	1	1	4	0	1	1	2	2	0	2	4	4	4	2	1	1	1	1	1	4	4	4	4	4	2	5	5	6	6	1	1	4
1975	1	1	1	4	0	1	1	2	2	0	2	1	1	1	4	0	1	1	2	2	0	2	3	4	4	2	1	1	5	1	1	2	5	5	5	3	5	5	3	7	1	1	-8	1
1976	1	1	1	4	0	1	1	2	2	0	2	1	1	1	4	0	1	1	2	2	0	2	4	2	4	2	1	1	1	1	1	4	3	2	3	4	3	6	5	6	3	2	3	3
1977	1	1	1	4	0	1	1	2	2	0	2	1	1	1	4	0	1	1	2	2	0	2	2	5	5	4	1	2	2	2	2	3	4	4	3	3	4	5	3	7	1	1	-8	2
1978	1	1	1	4	0	1	1	2	2	0	2	1	1	1	4	0	1	1	2	2	0	2	2	3	4	6	5	1	1	1	1	4	5	4	5	4	3	1	1	2	1	1	3	4
1979	1	1	1	4	0	1	1	2	2	0	2	1	1	1	4	0	1	1	2	2	0	2	2	4	4	2	1	1	2	1	1	4	2	2	1	1	5	5	7	7	7	2	3	2
1980	1	1	1	4	0	1	1	2	2	0	2	1	1	1	4	0	1	1	2	2	0	2	2	4	4	4	2	2	1	1	1	2	4	4	4	4	4	5	3	5	5	1	3	4
1981	1	1	1	4	0	1	1	2	2	0	2	1	1	1	4	0	1	1	2	2	0	2	4	4	4	8	0	8	1	1	1	1	4	2	2	2	4	2	1	2	1	1	3	4
1982	1	1	1	4	0	1	1	2	2	0	2	1	1	1	4	0	1	1	2	2	0	2	2	4	4	1	0	1	-8	-8	-8	3	3	4	4	3	5	4	6	4	2	2	2	1
1983	1	1	1	4	0	1	1	2	2	0	2	1	1	1	4	0	1	1	2	2	0	2	3	3	4	2	1	1	1	2	1	4	4	4	3	4	4	5	2	7	1	1	3	4
1984	1	1	1	4	0	1	1	2	2	0	2	1	1	1	4	0	1	1	2	2	0	2	2	2	4	0	0	0	5	1	1	4	1	2	4	2	1	3	8	5	10	2	3	1
1985	1	1	1	4	0	1	1	2	2	0	2	1	1	1	4	0	1	1	2	2	0	2	2	1	4	2	1	1	2	1	1	2	5	3	4	3	4	3	1	6	1	1	-8	1
1986	1	1	1	4	0	1	1	2	2	0	2	1	1	1	4	0	1	1	2	2	0	2	3	3	4	97	97	97	3	3	1	4	3	2	2	2	4	2	2	2	2	2	3	5
1987	1	1	1	4	0	1	1	2	2	0	2	1	1	1	4	0	1	1	2	2	0	2	2	4	5	2	1	1	1	1	1	3	5	4	5	3	5	8	9	9	1	1	3	1
1988	1	1	1	4	0	1	1	2	2	0	2	1	1	1	4	0	1	1	2	2	0	2	4	3	4	2	1	1	2	2	1	4	3	3	4	3	4	5	3	6	2	2	3	4
1989	1	1	1	4	0	1	1	2	2	0	2	1	1	1	4	0	1	1	2	2	0	2	2	5	5	2	1	1	1	1	1	2	5	5	5	2	5	8	5	10	2	1	3	4
1990	1	1	1	4	0	1	1	2	2	0	2	1	1	1	4	0	1	1	2	2	0	2	2	2	4	2	1	1	4	3	3	1	2	1	2	1	2	5	5	8	5	2	3	2
1991	1	1	1	4	0	1	1	2	2	0	2	1	1	1	4	0	1	1	2	2	0	2	4	4	4	2	1	1	3	3	3	2	5	3	5	4	5	5	5	6	6	2	3	5
1992	1	1	1	4	0	1	1	2	2	2	2	1	1	1	4	0	1	1	2	2	2	2	4	4	4	0	0	0	5	5	2	2	5	5	5	1	1	5	9	10	3	3	3	2
1993	1	1	1	4	0	1	1	2	2	2	2	1	1	1	4	0	1	1	2	2	2	2	3	3	4	2	1	1	1	1	1	4	2	4	4	4	5	6	4	8	3	1	3	2
1994	1	1	1	4	0	1	1	2	2	2	2	1	1	1	4	0	1	1	2	2	2	2	2	4	5	2	1	1	3	3	3	-8	4	3	3	3	3	5	3	8	3	1	3	3
1995	1	1	1	4	0	1	1	2	2	2	2	1	1	1	4	0	1	1	2	2	2	2	4	2	4	1	0	1	1	1	1	4	4	3	2	2	4	5	3	6	3	2	3	4
1996	1	1	1	4	0	1	1	2	2	2	2	1	1	1	4	0	1	1	2	2	2	2	1	5	4	2	2	0	1	1	1	2	5	5	5	1	1	5	5	5	2	3	3	-8
1997	1	1	1	4	0	1	1	2	2	2	2	1	1	1	4	0	1	1	2	2	2	2	3	5	5	1	1	0	1	1	1	2	4	1	4	-8	4	5	5	5	5	2	3	2
1998	1	1	1	4	0	1	1	2	2	2	2	1	1	1	4	0	1	1	2	2	2	2	2	3	4	1	97	97	1	1	1	1	2	4	4	4	2	3	5	4	7	2	3	4
1999	1	1	1	4	0	1	1	2	2	2	2	1	1	1	4	0	1	1	2	2	2	2	2	1	2	1	1	0	4	4	1	2	4	1	2	1	5	1	5	6	4	2	3	1
2000	1	1	1	4	0	1	1	2	2	2	2	1	1	1	4	0	1	1	2	2	2	2	3	3	4	1	1	0	2	2	3	4	1	2	2	1	5	5	5	7	3	2	3	2
2001	1	1	1	4	0	1	1	2	2	2	2	1	1	1	4	0	1	1	2	2	2	2	2	4	4	1	97	97	1	1	1	2	4	4	4	2	4	5	10	5	1	2	3	2
2002	1	1	1	4	0	1	1	2	2	2	2	1	1	1	4	0	1	1	2	2	2	2	2	4	4	1	97	97	2	1	-8	2	5	2	4	3	4	3	2	4	3	1	3	4
2003	1	1	1	4	0	1	1	2	2	2	2	1	1	1	4	0	1	1	2	2	2	2	-8	4	4	1	0	1	4	1	2	2	5	4	4	2	4	5	5	-8	5	2	3	2
2004	1	1	1	4	0	1	1	2	2	2	2	1	1	1	4	0	1	1	2	2	2	2	3	3	5	2	1	1	1	1	1	2	3	4	4	3	2	3	1	6	2	2	3	2
2005	1	1	1	4	0	1	1	2	2	2	2	1	1	1	4	0	1	1	2	2	2	2	3	3	2	1	1	0	1	1	1	1	4	4	3	4	4	3	1	2	1	1	3	3
2006	1	1	1	4	0	1	1	2	2	2	2	1	1	1	4	0	1	1	2	2	2	2	3	4	4	1	1	0	1	1	1	2	3	3	4	3	3	3	4	3	3	3	3	2
2007	1	1	1	4	0	1	1	2	2	2	2	1	1	1	4	0	1	1	2	2	2	2	4	3	4	2	2	0	3	3	3	2	3	3	3	3	3	5	5	5	4	2	3	2
2008	1	1	1	4	0	1	1	2	2	2	2	1	1	1	4	0	1	1	2	2	2	2	4	4	5	2	1	1	1	1	1	2	2	2	2	2	4	5	3	5	3	1	3	2
2009	1	1	1	4	0	1	1	2	1	2	2	1	1	1	4	0	1	1	2	1	2	2	3	3	4	2	1	1	3	1	1	2	2	2	1	2	4	5	4	7	5	-8	3	2
2010	1	1	1	4	0	1	1	2	1	2	2	1	1	1	4	0	1	1	2	1	2	2	4	2	3	2	1	1	1	1	1	2	1	1	1	1	5	2	7	-8	7	2	3	5
2011	1	1	1	4	0	1	1	2	1	2	2	1	1	1	4	0	1	1	2	1	2	2	1	3	5	4	2	2	1	1	1	4	4	4	5	2	4	5	6	4	3	2	1	5
2012	1	1	1	4	0	1	1	2	1	2	2	1	1	1	4	0	1	1	2	1	2	2	3	1	3	1	0	1	1	1	3	2	4	4	4	4	4	1	1	1	1	1	3	4
2013	1	1	1	4	0	1	1	2	1	2	2	1	1	1	4	0	1	1	2	1	2	2	2	2	3	2	1	1	-8	-8	-8	2	4	4	4	2	2	2	1	2	1	1	3	3
2014	1	1	1	4	0	1	1	2	1	2	2	1	1	1	4	0	1	1	2	1	2	2	5	4	4	2	1	1	4	4	2	4	4	2	4	1	4	6	5	7	6	2	3	2
2015	1	1	1	4	0	1	1	2	1	2	2	1	1	1	4	0	1	1	2	1	2	2	3	3	5	4	4	0	2	1	1	4	4	4	4	4	4	5	8	3	2	1	3	3
2016	1	1	1	4	0	1	1	2	1	2	2	1	1	1	4	0	1	1	2	1	2	2	2	2	4	2	1	1	3	1	1	4	2	2	3	2	2	5	5	7	5	2	3	4
2017	1	1	1	4	0	1	1	2	1	2	2	1	1	1	4	0	1	1	2	1	2	2	3	4	4	1	0	1	3	2	2	4	2	2	3	2	3	5	3	6	3	2	3	3
2018	1	1	1	4	0	1	1	2	1	2	2	1	1	1	4	0	1	1	2	1	2	2	2	4	5	1	0	1	3	3	2	2	3	2	5	3	5	5	3	7	5	1	3	1
2019	1	1	1	4	0	1	1	2	1	2	2	1	1	1	4	0	1	1	2	1	2	2	1	1	5	0	0	0	3	3	3	1	1	1	1	1	5	5	8	8	6	1	3	5
2020	1	1	1	4	0	1	1	2	1	2	2	1	1	1	4	0	1	1	2	1	2	2	4	4	4	2	1	1	3	2	3	3	3	4	4	3	4	3	3	2	3	2	3	4
2021	1	1	1	4	0	1	1	2	1	2	2	1	1	1	4	0	1	1	2	1	2	2	3	4	4	97	97	97	-8	-8	-8	3	4	4	4	-8	4	2	2	2	1	1	3	4
2022	1	1	1	4	0	1	1	2	1	2	2	1	1	1	4	0	1	1	2	1	2	2	4	4	4	2	1	1	3	3	3	4	2	2	2	2	5	5	4	5	3	2	3	2
2023	1	1	1	4	0	1	1	2	1	2	2	1	1	1	4	0	1	1	2	1	2	2	3	3	3	2	1	1	3	1	1	2	3	3	3	2	3	4	4	3	4	2	3	3
2024	1	1	1	4	0	1	1	2	1	2	2	1	1	1	4	0	1	1	2	1	2	2	3	3	4	2	1	1	2	2	2	4	2	3	3	1	4	5	4	7	4	2	3	4
2025	1	1	1	4	0	1	1	2	1	2	2	1	1	1	4	0	1	1	2	1	2	2	1	4	5	2	1	1	-8	-8	-8	3	4	4	-8	1	5	4	3	4	2	1	3	5
2026	1	1	1	4	0	1	1	2	1	2	2	1	1	1	4	0	1	1	2	1	2	2	3	3	4	2	1	1	1	1	1	4	4	3	3	3	4	6	5	7	5	1	3	2
2027	1	1	1	4	0	1	1	2	1	2	2	1	1	1	4	0	1	1	2	1	2	2	2	4	4	2	1	1	3	2	1	2	4	4	4	2	4	4	5	6	5	2	3	2
2028	1	1	1	4	0	1	1	2	1	2	2	1	1	1	4	0	1	1	2	1	2	2	5	4	4	2	1	1	1	1	1	1	2	4	3	2	2	1	1	3	2	-8	2	3
2029	1	1	1	4	0	1	1	2	1	2	2	1	1	1	4	0	1	1	2	1	2	2	2	4	4	3	0	3	1	1	1	2	4	2	2	2	4	4	4	5	3	2	3	4
2030	1	1	1	4	0	1	1	2	1	2	2	1	1	1	4	0	1	1	2	1	2	2	3	2	2	2	1	1	1	1	2	1	3	3	4	3	3	3	3	2	2	2	3	1
2031	1	1	1	4	0	1	1	2	1	2	2	1	1	1	4	0	1	1	2	1	2	2	3	3	2	1	97	97	3	3	3	4	1	3	3	1	4	2	2	2	2	2	3	3
2032	1	1	1	4	0	1	1	2	1	2	2	1	1	1	4	0	1	1	2	1	2	2	4	4	4	2	1	1	1	1	1	2	4	4	4	4	5	3	4	3	4	2	3	3
2033	1	1	1	4	0	1	1	2	1	2	2	1	1	1	4	0	1	1	2	1	2	2	4	5	4	2	1	1	1	1	1	4	3	3	4	4	4	5	5	7	5	2	3	4
2034	1	1	1	4	0	1	1	2	1	2	2	1	1	1	4	0	1	1	2	1	2	2	4	2	4	2	1	1	3	3	3	4	2	1	4	3	4	5	5	-8	6	2	1	2
2035	1	1	1	4	0	1	1	2	1	2	2	1	1	1	4	0	1	1	2	1	2	2	3	1	4	1	0	1	1	1	1	2	4	4	4	4	4	1	5	4	2	2	3	2
2036	1	1	1	4	0	1	1	2	1	2	2	1	1	1	4	0	1	1	2	1	2	2	4	2	1	-2	-2	-2	-8	-8	-8	4	4	3	4	2	4	1	1	1	1	2	2	3
2037	1	1	1	4	0	1	1	2	1	2	2	1	1	1	4	0	1	1	2	1	2	2	3	3	3	1	97	97	3	1	1	2	4	3	4	2	3	2	1	2	1	1	3	2
2038	1	1	1	4	0	1	1	2	1	2	2	1	1	1	4	0	1	1	2	1	2	2	3	4	5	1	0	1	3	3	1	2	4	3	4	3	3	7	5	7	6	1	3	1
2039	1	1	1	4	0	1	1	2	1	2	2	1	1	1	4	0	1	1	2	1	2	2	4	4	5	2	1	1	1	1	1	4	4	4	4	-8	3	2	1	2	1	1	3	4
2040	1	1	1	4	0	1	1	2	1	2	2	1	1	1	4	0	1	1	2	1	2	2	4	4	4	2	1	1	3	2	1	2	2	2	2	2	4	3	6	3	5	2	3	4
2041	1	1	1	4	0	1	1	2	1	2	2	1	1	1	4	0	1	1	2	1	2	2	2	4	5	1	1	0	3	3	1	2	1	2	1	1	5	5	2	7	8	2	3	2
2042	1	1	1	4	0	1	1	2	1	2	2	1	1	1	4	0	1	1	2	1	2	2	2	4	4	1	1	0	2	2	2	2	4	4	4	4	4	3	3	3	2	2	3	3
2043	1	1	1	4	0	1	1	2	1	2	2	1	1	1	4	0	1	1	2	1	2	2	4	2	3	1	1	0	1	1	2	3	4	4	4	3	4	3	2	5	2	1	1	2
2044	1	1	1	4	0	1	1	2	1	2	2	1	1	1	4	0	1	1	2	1	2	2	4	4	3	3	2	1	1	1	1	4	1	2	1	2	4	4	3	5	3	2	3	4
2045	1	1	1	4	0	1	1	2	1	2	2	1	1	1	4	0	1	1	2	1	2	2	3	4	4	2	1	1	3	3	3	2	2	2	2	2	5	6	6	7	6	2	3	5
2046	1	1	1	4	0	1	1	2	1	2	2	1	1	1	4	0	1	1	2	1	2	2	4	4	4	2	1	1	1	1	1	4	2	2	2	2	4	4	2	4	2	2	3	2
2047	1	1	1	4	0	1	1	2	1	2	2	1	1	1	4	0	1	1	2	1	2	2	4	4	3	-2	-2	-2	4	3	3	2	4	4	5	4	5	6	6	7	6	2	3	3
2048	1	1	1	4	0	1	1	2	1	2	2	1	1	1	4	0	1	1	2	1	2	2	4	4	4	97	97	97	1	2	1	4	2	4	3	4	4	5	5	-8	8	3	1	2
2049	1	1	1	4	0	1	1	2	1	2	2	1	1	1	4	0	1	1	2	1	2	2	4	2	4	2	1	1	-8	-8	-8	3	3	3	4	2	3	3	3	3	5	2	2	4
2050	1	1	1	4	0	1	1	2	1	2	2	1	1	1	4	0	1	1	2	1	2	2	2	5	4	3	1	2	1	1	3	2	5	5	5	1	5	8	9	10	5	1	3	1
2051	1	1	1	4	0	1	1	2	1	2	2	1	1	1	4	0	1	1	2	1	2	2	3	4	4	2	1	1	1	1	1	2	4	4	4	4	4	5	5	5	3	1	3	2
2052	1	1	1	4	0	1	1	2	1	2	2	1	1	1	4	0	1	1	2	1	2	2	3	4	4	2	1	1	2	1	1	4	4	3	2	2	4	5	4	6	4	1	3	2
2053	1	1	1	4	0	1	1	2	1	2	2	1	1	1	4	0	1	1	2	1	2	2	4	2	2	1	97	97	2	1	-8	2	4	4	4	3	4	3	2	4	2	1	3	2
2054	1	1	1	4	0	1	1	2	1	2	2	1	1	1	4	0	1	1	2	1	2	2	3	1	5	2	2	0	1	1	1	2	5	4	4	4	3	5	4	5	5	1	3	4
2055	1	1	1	4	0	1	1	2	1	2	2	1	1	1	4	0	1	1	2	1	2	2	4	4	5	1	0	1	2	2	2	4	3	2	2	2	3	4	4	6	4	2	3	3
2056	1	1	1	4	0	1	1	2	1	2	2	1	1	1	4	0	1	1	2	1	2	2	4	3	5	2	1	1	2	2	1	4	4	3	4	2	4	5	4	-8	2	3	1	2
2057	1	1	1	4	0	1	1	2	1	2	2	1	1	1	4	0	1	1	2	1	2	2	4	5	5	4	1	3	1	1	1	2	4	4	4	4	4	7	10	10	1	1	1	2
2058	1	1	1	4	0	1	1	2	1	2	2	1	1	1	4	0	1	1	2	1	2	2	4	4	4	1	1	0	1	1	1	4	4	4	4	2	4	5	3	5	3	2	3	2
2059	1	1	1	4	0	1	1	2	1	2	2	1	1	1	4	0	1	1	2	1	2	2	4	4	4	2	97	97	1	1	1	3	4	4	4	4	4	6	5	5	5	1	3	4
2060	1	1	1	4	0	1	1	2	1	2	2	1	1	1	4	0	1	1	2	1	2	2	2	4	4	1	97	97	1	1	1	2	3	3	3	2	3	5	2	5	1	1	1	4
2061	1	1	1	4	0	1	1	2	1	2	2	1	1	1	4	0	1	1	2	1	2	2	4	4	4	2	1	1	1	1	1	2	4	2	4	4	4	3	2	3	2	2	3	2
2062	1	1	1	4	0	1	1	2	1	2	2	1	1	1	4	0	1	1	2	1	2	2	4	3	4	1	0	1	-8	-8	-8	2	5	5	5	3	3	5	5	5	2	2	2	2
2063	1	1	1	4	0	1	1	2	1	2	2	1	1	1	4	0	1	1	2	1	2	2	4	2	2	2	1	1	-8	-8	-8	-8	4	3	4	3	3	1	1	2	1	2	3	4
2064	1	1	1	4	0	1	1	2	1	2	2	1	1	1	4	0	1	1	2	1	2	2	3	4	3	2	1	1	1	4	1	2	4	3	4	3	3	5	5	5	5	1	3	2
2065	1	1	1	4	0	1	1	2	1	2	2	1	1	1	4	0	1	1	2	1	2	2	1	3	4	1	1	0	1	1	1	2	1	1	1	1	5	4	2	8	5	2	3	3
2066	1	1	1	4	0	1	1	2	1	2	2	1	1	1	4	0	1	1	2	1	2	2	2	4	4	1	97	97	2	1	1	2	5	5	5	5	5	2	2	3	3	2	3	4
2067	1	1	1	4	0	1	1	2	1	2	2	1	1	1	4	0	1	1	2	1	2	2	1	4	3	1	97	97	1	1	2	2	5	5	5	1	5	2	1	3	1	1	3	2
2068	1	1	1	4	0	1	1	2	1	2	2	1	1	1	4	0	1	1	2	1	2	2	4	4	4	2	1	1	1	1	1	4	4	4	5	3	5	5	5	5	6	1	3	2
2069	1	1	1	4	0	1	1	2	1	2	2	1	1	1	4	0	1	1	2	1	2	2	5	1	4	1	1	0	3	3	2	4	5	2	5	2	2	5	6	-8	7	2	1	3
2070	1	1	1	4	0	1	1	2	1	2	2	1	1	1	4	0	1	1	2	1	2	2	4	4	4	2	1	1	1	1	1	2	2	2	2	2	4	4	2	4	2	2	3	2
2071	1	1	1	4	0	1	1	2	1	2	2	1	1	1	4	0	1	1	2	1	2	2	4	1	3	2	1	1	1	1	1	1	5	2	5	3	4	3	5	1	1	1	2	5
2072	1	1	1	4	0	1	1	2	1	2	2	1	1	1	4	0	1	1	2	1	2	2	3	3	3	2	1	1	-8	-8	-8	2	2	2	4	2	3	2	1	3	1	2	2	4
2073	1	1	1	4	0	1	1	2	1	2	2	1	1	1	4	0	1	1	2	1	2	2	4	4	4	5	0	5	1	1	1	4	4	3	3	2	3	6	6	4	6	2	3	4
2074	1	1	1	4	0	1	1	2	1	2	2	1	1	1	4	0	1	1	2	1	2	2	4	4	5	2	1	1	2	1	1	4	2	2	2	2	4	5	3	7	3	2	3	2
2075	1	1	1	4	0	1	1	2	1	2	2	1	1	1	4	0	1	1	2	1	2	2	2	4	4	3	2	1	2	2	3	-8	4	2	4	2	2	4	3	5	5	2	3	4
2076	1	1	1	4	0	1	1	2	1	2	2	1	1	1	4	0	1	1	2	1	2	2	2	4	5	3	1	2	1	1	1	2	4	2	2	2	4	5	3	5	3	1	3	2
2077	1	1	1	4	0	1	1	2	1	2	2	1	1	1	4	0	1	1	2	1	2	2	2	2	5	2	1	1	1	1	5	2	1	1	1	1	5	6	7	4	1	2	2	1
2078	1	1	1	4	0	1	1	2	1	2	2	1	1	1	4	0	1	1	2	1	2	2	3	4	3	3	1	2	4	-8	-8	2	4	4	4	2	2	3	3	6	3	2	1	4
2079	1	1	1	4	0	1	1	2	1	2	2	1	1	1	4	0	1	1	2	1	2	2	2	4	4	6	1	5	1	1	1	2	4	4	4	2	4	3	2	4	1	1	3	4
2080	1	1	1	4	0	1	1	2	1	2	2	1	1	1	4	0	1	1	2	1	2	2	2	2	4	4	1	3	1	1	1	1	4	3	3	3	4	2	2	2	1	2	3	2
2081	1	1	1	4	0	1	1	2	1	2	2	1	1	1	4	0	1	1	2	1	2	2	3	4	4	2	1	1	2	2	3	2	2	2	2	2	4	5	5	5	5	1	3	4
2082	1	1	1	4	0	1	1	2	1	2	2	1	1	1	4	0	1	1	2	1	2	2	3	2	4	2	1	1	1	1	3	2	2	2	2	2	4	7	2	8	2	1	3	3
2083	1	1	1	4	0	1	1	2	1	2	2	1	1	1	4	0	1	1	2	1	2	2	2	3	4	2	1	1	2	4	2	2	4	2	4	3	4	6	5	6	7	2	3	4
2084	1	1	1	4	0	1	1	2	1	2	2	1	1	1	4	0	1	1	2	1	2	2	4	4	4	2	1	1	1	1	1	2	3	3	3	3	4	6	5	7	3	1	3	2
2085	1	1	1	4	0	1	1	2	1	2	2	1	1	1	4	0	1	1	2	1	2	2	5	3	3	2	1	1	1	1	1	2	4	2	5	4	4	1	5	1	6	1	3	2
2086	1	1	1	4	0	1	1	2	1	2	2	1	1	1	4	0	1	1	2	1	2	2	2	4	4	2	1	1	1	1	1	2	5	5	5	2	5	1	1	1	1	1	3	2
2087	1	1	1	4	0	1	1	2	1	2	2	1	1	1	4	0	1	1	2	1	2	2	5	4	4	2	1	1	1	1	1	4	4	4	4	3	3	6	5	5	6	2	3	4
2088	1	1	1	4	0	1	1	2	1	2	2	1	1	1	4	0	1	1	2	1	2	2	2	2	4	2	1	1	2	1	3	1	1	1	1	1	4	1	1	5	1	1	3	4
2089	1	1	1	4	0	1	1	2	1	2	2	1	1	1	4	0	1	1	2	1	2	2	5	1	4	2	1	1	1	1	1	2	5	5	5	5	5	3	5	-8	7	1	3	5
2090	1	1	1	4	0	1	1	2	1	2	2	1	1	1	4	0	1	1	2	1	2	2	3	4	4	3	1	2	-8	-8	-8	3	5	5	5	1	5	3	3	3	3	2	3	3
2091	1	1	1	4	0	1	1	2	1	2	2	1	1	1	4	0	1	1	2	1	2	2	3	5	5	2	1	1	3	3	4	4	1	1	2	1	5	6	4	7	5	2	3	4
2092	1	1	1	4	0	1	1	2	1	2	2	1	1	1	4	0	1	1	2	1	2	2	2	3	3	1	1	0	3	3	3	4	2	3	3	2	3	3	4	3	3	2	3	3
2093	1	1	1	4	0	1	1	2	1	2	2	1	1	1	4	0	1	1	2	1	2	2	4	4	4	2	1	1	1	1	1	2	5	5	5	5	5	5	5	5	5	2	3	2
2094	1	1	1	4	0	1	1	2	1	2	2	1	1	1	4	0	1	1	2	1	2	2	4	4	4	2	1	1	2	1	1	2	4	4	4	4	3	1	1	1	1	1	3	2
2095	1	1	1	4	0	1	1	2	1	2	2	1	1	1	4	0	1	1	2	1	2	2	4	3	4	2	1	1	3	1	1	2	5	5	4	4	3	5	4	5	4	2	3	3
2096	1	1	1	4	0	1	1	2	1	2	2	1	1	1	4	0	1	1	2	1	2	2	2	3	4	1	1	0	1	1	1	2	2	1	2	2	5	3	2	4	1	1	3	5
2097	1	1	1	4	0	1	1	2	1	2	2	1	1	1	4	0	1	1	2	1	2	2	4	4	2	2	1	1	1	1	1	2	4	4	5	1	2	2	2	2	2	2	3	4
2098	1	1	1	4	0	1	1	2	1	2	2	1	1	1	4	0	1	1	2	1	2	2	3	2	4	2	1	1	3	3	3	4	3	3	2	3	2	5	3	5	3	1	3	3
2099	1	1	1	4	0	1	1	2	1	2	2	1	1	1	4	0	1	1	2	1	2	2	5	3	3	1	0	1	1	1	1	4	3	3	3	3	2	4	4	4	3	2	3	4
2100	1	1	1	4	0	1	1	2	1	2	2	1	1	1	4	0	1	1	2	1	2	2	2	4	4	3	1	2	1	1	1	2	5	5	1	4	4	8	8	8	4	1	3	2
2101	1	1	1	4	0	1	1	2	1	2	2	1	1	1	4	0	1	1	2	1	2	2	4	1	5	2	1	1	2	2	1	4	4	2	2	2	2	3	3	3	2	2	3	2
2102	1	1	1	4	0	1	1	2	1	2	2	1	1	1	4	0	1	1	2	1	2	2	2	3	4	0	0	0	1	1	1	1	1	3	3	3	3	2	2	2	2	2	3	2
2103	1	1	1	4	0	1	1	2	1	2	2	1	1	1	4	0	1	1	2	1	2	2	4	3	4	1	97	97	2	1	1	2	5	5	4	4	3	5	5	5	5	1	2	4
2104	1	1	1	4	0	1	1	2	1	2	2	1	1	1	4	0	1	1	2	1	2	2	4	4	4	2	1	1	1	1	1	3	4	4	4	3	2	1	5	-8	2	1	3	3
2105	1	1	1	4	0	1	1	2	1	2	2	1	1	1	4	0	1	1	2	1	2	2	2	4	5	1	1	0	1	1	3	2	1	2	1	1	5	5	4	5	7	1	3	1
2106	1	1	1	4	0	1	1	2	1	2	2	1	1	1	4	0	1	1	2	1	2	2	4	4	4	2	1	1	1	1	1	2	4	4	4	4	4	3	2	4	2	1	3	2
2107	1	1	1	4	0	1	1	2	1	2	2	1	1	1	4	0	1	1	2	1	2	2	2	2	4	2	1	1	2	2	2	2	2	4	2	2	2	8	8	9	6	2	3	4
2108	1	1	1	4	0	1	1	2	1	2	2	1	1	1	4	0	1	1	2	1	2	2	3	3	3	0	0	0	3	3	3	4	2	3	2	2	3	3	4	5	4	2	3	3
2109	1	1	1	4	0	1	1	2	1	2	2	1	1	1	4	0	1	1	2	1	2	2	2	4	5	1	1	0	1	1	1	2	5	3	3	3	4	5	4	6	4	2	3	2
2110	1	1	1	4	0	1	1	2	1	2	2	1	1	1	4	0	1	1	2	1	2	2	4	3	4	0	0	0	3	1	1	1	5	5	5	3	3	5	6	4	5	2	2	2
2111	1	1	1	4	0	1	1	2	1	2	2	1	1	1	4	0	1	1	2	1	2	2	4	3	5	1	0	1	3	1	3	2	1	1	2	1	4	5	4	7	4	2	3	1
2112	1	1	1	4	0	1	1	2	1	2	2	1	1	1	4	0	1	1	2	1	2	2	2	4	4	1	1	0	1	1	1	4	4	4	4	3	3	4	3	5	2	1	3	4
2113	1	1	1	4	0	1	1	2	1	2	2	1	1	1	4	0	1	1	2	1	2	2	3	4	5	2	1	1	3	3	-8	4	4	4	4	2	2	1	1	1	1	1	3	4
2114	1	1	1	4	0	1	1	2	1	2	2	1	1	1	4	0	1	1	2	1	2	2	4	3	4	-2	-2	-2	5	5	5	2	4	5	4	3	2	6	6	6	6	2	3	4
2115	1	1	1	4	0	1	1	2	1	2	2	1	1	1	4	0	1	1	2	1	2	2	2	3	3	1	0	1	4	3	3	4	4	2	4	2	4	3	4	3	5	2	1	4
2116	1	1	1	4	0	1	1	2	1	2	2	1	1	1	4	0	1	1	2	1	2	2	2	4	4	2	1	1	3	-8	-8	2	4	4	4	4	4	5	5	5	2	1	3	2
2117	1	1	1	4	0	1	1	2	1	2	2	1	1	1	4	0	1	1	2	1	2	2	4	1	4	2	1	1	1	1	1	2	2	2	2	2	4	4	3	5	3	2	3	2
2118	1	1	1	4	0	1	1	2	1	2	2	1	1	1	4	0	1	1	2	1	2	2	4	4	5	2	2	0	1	1	1	2	4	4	4	3	3	4	1	4	1	2	3	4
2119	1	1	1	4	0	1	1	2	1	2	2	1	1	1	4	0	1	1	2	1	2	2	5	4	5	1	1	0	1	1	2	2	4	3	3	2	4	5	5	5	4	1	3	4
2120	1	1	1	4	0	1	1	2	1	2	2	1	1	1	4	0	1	1	2	1	2	2	4	4	4	4	2	2	1	1	1	2	5	5	5	4	4	4	4	4	4	1	3	3
2121	1	1	1	4	0	1	1	2	1	2	2	1	1	1	4	0	1	1	2	1	2	2	4	4	5	2	1	1	1	1	1	2	2	2	4	3	2	3	1	5	1	2	3	2
2122	1	1	1	4	0	1	1	2	1	2	2	1	1	1	4	0	1	1	2	1	2	2	4	4	4	2	1	1	1	1	1	4	3	3	3	3	3	5	5	4	5	2	3	4
2123	1	1	1	4	0	1	1	2	1	2	2	1	1	1	4	0	1	1	2	1	2	2	2	4	4	2	1	1	3	2	3	4	4	4	3	2	2	4	4	6	3	2	3	4
2124	1	1	1	4	0	1	1	2	1	2	2	1	1	1	4	0	1	1	2	1	2	2	2	4	5	2	1	1	2	2	3	2	4	4	4	4	4	5	5	6	4	3	3	2
2125	1	1	1	4	0	1	1	2	1	2	2	1	1	1	4	0	1	1	2	1	2	2	4	4	4	2	1	1	1	1	1	4	2	2	2	2	4	5	4	6	3	2	3	2
2126	1	1	1	4	0	1	1	2	1	2	2	1	1	1	4	0	1	1	2	1	2	2	4	4	5	2	1	1	1	1	1	4	4	4	4	4	4	3	2	4	2	1	3	3
2127	1	1	1	4	0	1	1	2	1	2	2	1	1	1	4	0	1	1	2	1	2	2	3	4	4	2	1	1	2	2	-8	4	2	2	2	2	4	3	2	3	2	2	3	4
2128	1	1	1	4	0	1	1	2	1	2	2	1	1	1	4	0	1	1	2	1	2	2	4	2	5	1	1	0	2	2	3	2	4	4	4	2	4	5	8	8	4	2	3	4
2129	1	1	1	4	0	1	1	2	1	2	2	1	1	1	4	0	1	1	2	1	2	2	4	4	4	3	1	2	1	1	1	-8	2	2	2	2	4	4	3	4	2	2	3	2
2130	1	1	1	4	0	1	1	2	1	2	2	1	1	1	4	0	1	1	2	1	2	2	4	4	4	2	1	1	3	3	3	3	4	2	3	2	4	3	2	4	1	2	3	4
2131	1	1	1	4	0	1	1	2	1	2	2	1	1	1	4	0	1	1	2	1	2	2	2	4	4	2	1	1	2	2	1	2	4	4	4	2	4	1	1	1	1	1	3	4
2132	1	1	1	4	0	1	1	2	1	2	2	1	1	1	4	0	1	1	2	1	2	2	4	4	4	2	1	1	4	1	4	2	1	1	2	1	4	6	4	8	5	2	3	2
2133	1	1	1	4	0	1	1	2	1	2	2	1	1	1	4	0	1	1	2	1	2	2	4	4	5	2	1	1	1	1	1	2	5	5	5	2	5	5	3	7	3	1	3	2
2134	1	1	1	4	0	1	1	2	1	2	2	1	1	1	4	0	1	1	2	1	2	2	2	2	5	2	1	1	3	1	3	2	2	2	2	2	5	4	7	5	5	2	3	4
2135	1	1	1	4	0	1	1	2	0	2	2	1	1	1	4	0	1	1	2	0	2	2	4	4	4	2	1	1	1	1	1	1	4	3	2	3	4	2	1	1	5	1	3	4
2136	1	1	1	4	0	1	1	2	0	2	2	1	1	1	4	0	1	1	2	0	2	2	5	1	2	0	0	0	1	1	-8	1	2	3	5	2	5	1	1	3	2	2	3	5
2137	1	1	1	4	0	1	1	2	0	2	2	1	1	1	4	0	1	1	2	0	2	2	4	2	4	1	0	1	1	1	1	4	4	2	2	2	4	3	6	1	1	2	2	2
2138	1	1	1	4	0	1	1	2	0	2	2	1	1	1	4	0	1	1	2	0	2	2	4	4	5	1	0	1	5	2	3	2	1	1	4	1	4	4	4	5	3	2	3	4
2139	1	1	1	4	0	1	1	2	0	2	2	1	1	1	4	0	1	1	2	0	2	2	1	4	5	2	1	1	1	2	3	1	4	4	4	4	4	2	1	2	1	1	3	4
2140	1	1	1	4	0	1	1	2	0	2	2	1	1	1	4	0	1	1	2	0	2	2	5	4	5	2	1	1	3	1	1	4	3	1	5	1	4	4	1	6	2	2	3	2
2141	1	1	1	4	0	1	1	2	0	2	2	1	1	1	4	0	1	1	2	0	2	2	3	4	5	1	1	0	1	1	1	2	2	2	2	2	3	2	1	2	1	1	3	4
2142	1	1	1	4	0	1	1	2	0	2	2	1	1	1	4	0	1	1	2	0	2	2	2	3	4	1	1	0	1	1	1	4	2	2	3	2	4	5	4	6	4	2	3	2
2143	1	1	1	4	0	1	1	2	0	2	2	1	1	1	4	0	1	1	2	0	2	2	4	4	5	1	0	1	5	1	4	2	3	1	4	2	5	5	5	5	5	2	3	4
2144	1	1	1	4	0	1	1	2	0	2	2	1	1	1	4	0	1	1	2	0	2	2	4	4	5	2	1	1	2	2	2	4	3	3	3	3	3	3	2	4	2	1	3	4
2145	1	1	1	4	0	1	1	2	0	2	2	1	1	1	4	0	1	1	2	0	2	2	3	3	4	2	1	1	-8	-8	-8	2	2	2	3	2	3	2	1	3	1	3	2	4
2146	1	1	1	4	0	1	1	2	0	2	2	1	1	1	4	0	1	1	2	0	2	2	4	4	4	2	1	1	1	4	4	4	4	4	3	4	3	6	5	7	4	2	3	4
2147	1	1	1	4	0	1	1	3	0	2	2	1	1	1	4	0	1	1	3	0	2	2	2	4	5	2	2	0	-8	-8	-8	3	4	4	4	4	3	4	4	4	2	2	3	4
2148	1	1	1	4	0	1	1	3	0	2	2	1	1	1	4	0	1	1	3	0	2	2	2	4	5	2	1	1	1	1	1	2	5	5	5	1	4	5	6	6	5	2	3	5
2149	1	1	1	4	0	1	1	3	0	2	2	1	1	1	4	0	1	1	3	0	2	2	2	4	3	2	1	1	-8	-8	-8	4	4	2	2	-8	4	3	1	3	3	2	3	3
2150	1	1	1	4	0	1	1	3	0	2	2	1	1	1	4	0	1	1	3	0	2	2	2	4	4	2	1	1	2	2	2	2	5	4	4	5	5	1	1	2	1	2	3	2
2151	1	1	1	4	0	1	1	3	0	2	2	1	1	1	4	0	1	1	3	0	2	2	2	4	4	4	2	2	1	1	1	4	4	4	4	3	4	6	4	6	3	1	3	2
2152	1	1	1	4	0	1	1	3	0	2	2	1	1	1	4	0	1	1	3	0	2	2	4	4	4	2	1	1	3	3	3	3	4	4	4	5	5	5	6	6	8	1	3	3
2153	1	1	1	4	0	1	1	3	0	2	2	1	1	1	4	0	1	1	3	0	2	2	1	4	5	2	1	1	1	1	5	4	4	4	2	2	4	7	5	7	5	2	3	2
2154	1	1	1	4	0	1	1	3	0	2	2	1	1	1	4	0	1	1	3	0	2	2	2	1	3	2	1	1	1	1	1	2	4	4	2	2	4	1	1	1	1	1	3	4
2155	1	1	1	4	0	1	1	3	0	2	2	1	1	1	4	0	1	1	3	0	2	2	2	2	4	0	0	0	2	1	1	2	3	2	3	3	3	5	4	4	4	2	3	2
2156	1	1	1	4	0	1	1	3	0	2	2	1	1	1	4	0	1	1	3	0	2	2	4	4	5	2	1	1	1	1	1	2	3	4	4	3	4	5	3	8	2	1	3	2
2157	1	1	1	4	0	1	1	3	0	2	2	1	1	1	4	0	1	1	3	0	2	2	2	4	4	2	1	1	1	1	1	2	5	4	4	4	1	10	10	10	5	1	3	2
2158	1	1	1	4	0	1	1	3	0	2	2	1	1	1	4	0	1	1	3	0	2	2	3	4	4	2	1	1	2	2	3	3	4	2	4	2	4	3	2	3	2	2	3	4
2159	1	1	1	4	0	1	1	3	0	2	2	1	1	1	4	0	1	1	3	0	2	2	2	4	4	2	1	1	2	1	2	2	1	1	1	1	5	4	3	7	2	1	-8	2
2160	1	1	1	4	0	1	1	3	0	2	2	1	1	1	4	0	1	1	3	0	2	2	4	2	3	1	1	0	4	2	4	2	4	2	4	4	5	5	6	5	5	2	1	2
2161	1	1	1	4	0	1	1	3	0	2	2	1	1	1	4	0	1	1	3	0	2	2	4	4	4	2	1	1	1	1	1	4	2	2	2	2	4	5	3	5	3	2	3	2
2162	1	1	1	4	0	1	1	3	0	2	2	1	1	1	4	0	1	1	3	0	2	2	2	4	4	2	1	1	1	1	3	2	4	2	4	2	3	4	2	6	2	1	3	2
2163	1	1	1	4	0	1	1	3	0	2	2	1	1	1	4	0	1	1	3	0	2	2	4	4	5	2	1	1	3	1	4	4	4	2	3	1	4	6	6	6	5	2	3	4
2164	1	1	1	4	0	1	1	3	0	2	2	1	1	1	4	0	1	1	3	0	2	2	4	4	4	2	1	1	1	1	1	3	5	5	5	5	5	6	7	6	7	2	3	4
2165	1	1	1	4	0	1	1	3	0	2	2	1	1	1	4	0	1	1	3	0	2	2	4	2	3	3	3	0	1	1	1	1	5	2	5	3	5	1	1	1	1	1	3	2
2166	1	1	1	4	0	1	1	3	0	2	2	1	1	1	4	0	1	1	3	0	2	2	4	3	4	0	0	0	4	3	1	1	4	4	4	4	3	5	4	5	4	2	3	4
2167	1	1	1	4	0	1	1	3	0	2	2	1	1	1	4	0	1	1	3	0	2	2	4	2	5	2	1	1	4	2	-8	2	2	2	4	2	4	3	1	3	1	1	3	2
2168	1	1	1	4	0	1	1	3	0	2	2	1	1	1	4	0	1	1	3	0	2	2	3	4	3	2	1	1	2	2	2	4	3	3	3	3	3	5	4	5	4	1	3	3
2169	1	1	1	4	0	1	1	3	0	2	2	1	1	1	4	0	1	1	3	0	2	2	2	3	4	2	1	1	2	1	1	2	2	1	2	2	3	4	3	5	3	1	3	2
2170	1	1	1	4	0	1	1	3	0	2	2	1	1	1	4	0	1	1	3	0	2	2	2	2	4	2	1	1	2	2	1	4	2	2	4	4	1	5	3	6	3	1	3	4
2171	1	1	1	4	0	1	1	3	0	2	2	1	1	1	4	0	1	1	3	0	2	2	2	4	3	2	1	1	3	1	1	2	2	2	2	2	4	4	4	8	4	-8	3	2
2172	1	1	1	4	0	1	1	3	0	2	2	1	1	1	4	0	1	1	3	0	2	2	3	4	4	2	1	1	-8	2	-8	2	2	4	2	2	3	3	2	3	2	1	3	4
2173	1	1	1	4	0	1	1	3	0	2	2	1	1	1	4	0	1	1	3	0	2	2	2	4	5	0	0	0	3	3	3	2	4	4	4	4	4	5	2	6	3	1	3	-8
2174	1	1	1	4	0	1	1	3	0	2	2	1	1	1	4	0	1	1	3	0	2	2	4	2	4	2	2	0	1	1	1	1	4	4	4	4	4	5	3	7	1	1	3	3
2175	1	1	1	4	0	1	1	3	0	2	2	1	1	1	4	0	1	1	3	0	2	2	2	3	4	1	0	1	1	1	1	3	4	4	2	4	4	4	4	4	1	1	3	4
2176	1	1	1	4	0	1	1	3	0	2	2	1	1	1	4	0	1	1	3	0	2	2	3	4	5	2	1	1	2	2	2	2	2	4	2	2	4	3	3	3	3	1	3	2
2177	1	1	1	4	0	1	1	3	0	2	2	1	1	1	4	0	1	1	3	0	2	2	5	4	4	3	2	1	1	1	1	2	5	3	2	4	5	2	5	1	1	2	2	1
2178	1	1	1	4	0	1	1	3	0	2	2	1	1	1	4	0	1	1	3	0	2	2	3	2	5	2	1	1	1	1	1	3	4	4	2	2	4	5	1	4	1	2	3	2
2179	1	1	1	4	0	1	1	3	0	2	2	1	1	1	4	0	1	1	3	0	2	2	2	3	4	2	1	1	2	2	1	2	2	2	3	2	4	4	5	5	4	3	1	4
2180	1	1	1	4	0	1	1	3	0	2	2	1	1	1	4	0	1	1	3	0	2	2	3	4	5	4	1	3	1	1	1	4	5	4	4	3	4	5	4	5	4	1	3	2
2181	1	1	1	4	0	1	1	3	0	2	2	1	1	1	4	0	1	1	3	0	2	2	3	4	5	2	1	1	1	1	1	1	4	4	4	2	4	4	3	5	3	2	3	4
2182	1	1	1	4	0	1	1	3	0	2	2	1	1	1	4	0	1	1	3	0	2	2	2	4	4	2	1	1	3	2	-8	2	2	3	2	2	3	4	3	4	2	2	3	3
2183	1	1	1	4	0	1	1	3	0	2	2	1	1	1	4	0	1	1	3	0	2	2	4	4	3	2	1	1	1	1	1	3	4	4	4	2	5	2	1	2	3	1	3	4
2184	1	1	1	4	0	1	1	3	0	2	2	1	1	1	4	0	1	1	3	0	2	2	2	4	5	2	1	1	1	1	1	4	4	2	4	2	4	4	3	4	3	1	3	2
2185	1	1	1	4	0	1	1	3	0	2	2	1	1	1	4	0	1	1	3	0	2	2	3	3	4	2	1	1	3	-8	-8	2	3	2	2	2	2	3	2	3	2	2	3	3
2186	1	1	1	4	0	1	1	3	0	2	2	1	1	1	4	0	1	1	3	0	2	2	4	4	4	1	0	1	3	3	3	3	4	4	4	4	4	5	6	6	5	2	3	4
2187	1	1	1	3	0	1	1	3	0	2	2	1	1	1	3	0	1	1	3	0	2	2	3	4	4	2	1	1	4	2	1	4	2	2	4	4	4	4	3	7	1	2	3	4
2188	1	1	1	3	0	1	1	3	0	2	2	1	1	1	3	0	1	1	3	0	2	2	4	3	3	2	1	1	3	2	1	2	5	3	2	2	3	1	4	3	6	2	3	3
2189	1	1	1	3	0	1	1	3	0	2	2	1	1	1	3	0	1	1	3	0	2	2	4	2	4	2	1	1	2	2	3	2	5	4	4	1	5	1	1	1	1	1	3	2
2190	1	1	1	3	0	1	1	3	0	2	2	1	1	1	3	0	1	1	3	0	2	2	2	4	5	4	2	2	1	1	1	2	2	2	4	2	4	5	1	10	4	3	3	2
2191	1	1	1	3	0	1	1	3	0	2	2	1	1	1	3	0	1	1	3	0	2	2	3	2	4	1	0	1	1	1	1	4	4	4	4	-8	3	3	2	4	2	2	3	3
2192	1	1	1	3	0	1	1	3	0	2	2	1	1	1	3	0	1	1	3	0	2	2	5	2	4	2	1	1	3	3	3	4	4	3	2	2	5	4	3	5	3	2	3	2
2193	1	1	1	3	0	1	1	3	0	2	2	1	1	1	3	0	1	1	3	0	2	2	4	3	4	2	1	1	1	1	1	2	4	4	4	4	4	6	6	4	5	1	3	4
2194	1	1	1	3	0	1	1	3	0	2	2	1	1	1	3	0	1	1	3	0	2	2	2	3	4	4	2	2	1	1	1	2	4	3	5	2	2	4	3	4	6	2	3	2
2195	1	1	1	3	0	1	1	3	0	2	2	1	1	1	3	0	1	1	3	0	2	2	3	4	4	2	1	1	1	1	1	1	4	4	4	2	3	5	4	7	3	2	3	4
2196	1	1	1	3	0	1	1	3	0	2	2	1	1	1	3	0	1	1	3	0	2	2	2	5	5	1	1	0	2	1	1	3	4	4	2	2	5	4	2	4	2	1	3	4
2197	1	1	1	3	0	1	1	3	0	2	2	1	1	1	3	0	1	1	3	0	2	2	2	4	4	0	0	0	1	1	2	2	1	1	1	1	3	5	5	8	5	2	3	3
2198	1	1	1	3	0	1	1	3	0	2	2	1	1	1	3	0	1	1	3	0	2	2	4	2	1	2	1	1	-8	-8	-8	2	4	4	4	4	4	3	2	5	2	2	3	4
2199	1	1	1	3	0	1	1	3	0	2	2	1	1	1	3	0	1	1	3	0	2	2	4	2	4	2	1	1	1	1	1	4	2	2	2	2	4	5	4	6	3	2	3	2
2200	1	1	1	3	0	1	1	3	0	2	2	1	1	1	3	0	1	1	3	0	2	2	2	2	4	2	1	1	-8	1	1	4	4	4	4	2	4	6	5	5	3	2	1	4
2201	1	1	1	3	0	1	1	3	0	2	2	1	1	1	3	0	1	1	3	0	2	2	4	5	4	2	1	1	2	1	1	2	5	3	4	4	4	5	4	8	2	1	-8	2
2202	1	1	1	3	0	1	1	3	0	2	2	1	1	1	3	0	1	1	3	0	2	2	2	4	4	2	1	1	1	1	1	2	4	4	3	3	4	4	3	5	2	1	3	4
2203	1	1	1	3	0	1	1	3	0	2	2	1	1	1	3	0	1	1	3	0	2	2	2	4	4	1	97	97	3	4	1	2	1	4	4	4	5	4	2	6	1	1	3	4
2204	1	1	1	3	0	1	1	3	0	2	2	1	1	1	3	0	1	1	3	0	2	2	4	2	4	0	0	0	1	3	1	2	4	4	2	2	4	5	4	7	4	2	3	4
2205	1	1	1	3	0	1	1	3	0	2	2	1	1	1	3	0	1	1	3	0	2	2	4	3	4	2	1	1	-8	-8	-8	4	4	3	4	2	3	1	1	1	1	1	3	4
2206	1	1	1	3	0	1	1	3	0	2	2	1	1	1	3	0	1	1	3	0	2	2	4	4	4	2	1	1	1	1	1	4	4	3	3	4	3	4	5	3	5	2	3	4
2207	1	1	1	3	0	1	1	3	0	2	2	1	1	1	3	0	1	1	3	0	2	2	2	2	4	2	1	1	2	1	1	2	4	4	2	2	4	5	3	5	3	3	-8	2
2208	1	1	1	3	0	1	1	3	0	2	2	1	1	1	3	0	1	1	3	0	2	2	4	2	3	1	97	97	1	1	1	2	4	5	5	3	4	3	4	4	5	2	3	4
2209	1	1	1	3	0	1	1	3	0	2	2	1	1	1	3	0	1	1	3	0	2	2	3	3	4	1	1	0	3	1	1	4	2	1	2	4	5	5	3	5	7	2	3	4
2210	1	1	1	3	0	1	1	3	0	2	2	1	1	1	3	0	1	1	3	0	2	2	2	2	2	2	1	1	1	1	1	4	5	1	5	4	5	4	5	2	2	2	3	5
2211	1	1	1	3	0	1	1	3	0	2	2	1	1	1	3	0	1	1	3	0	2	2	4	4	4	1	1	0	3	2	3	2	2	2	4	1	5	5	4	6	4	2	3	2
2212	1	1	1	3	0	1	1	3	0	2	2	1	1	1	3	0	1	1	3	0	2	2	3	4	4	3	2	1	1	1	1	4	4	4	3	3	4	5	6	5	6	2	3	3
2213	1	1	1	3	0	1	1	3	0	2	2	1	1	1	3	0	1	1	3	0	2	2	4	3	4	2	1	1	2	1	1	1	1	2	2	2	4	3	5	3	4	1	3	2
2214	1	1	1	3	0	1	1	3	0	2	2	1	1	1	3	0	1	1	3	0	2	2	2	4	4	2	1	1	2	2	-8	4	4	4	2	2	4	1	1	1	1	1	3	4
2215	1	1	1	3	0	1	1	3	0	2	2	1	1	1	3	0	1	1	3	0	2	2	2	2	3	3	97	97	3	1	1	1	1	1	5	1	5	2	2	2	1	2	3	1
2216	1	1	1	3	0	1	1	3	0	2	2	1	1	1	3	0	1	1	3	0	2	2	3	4	4	1	1	0	-8	-8	-8	3	3	2	4	2	4	5	1	5	2	2	3	4
2217	1	1	1	3	0	1	1	3	0	2	2	1	1	1	3	0	1	1	3	0	2	2	4	2	4	2	1	1	1	1	1	2	2	2	3	-8	3	2	1	2	1	1	3	4
2218	1	1	1	3	0	1	1	3	0	2	2	1	1	1	3	0	1	1	3	0	2	2	3	4	4	2	1	1	1	1	3	2	2	2	2	2	4	5	5	5	5	1	3	4
2219	1	2	1	3	0	1	1	3	0	2	2	1	2	1	3	0	1	1	3	0	2	2	4	2	4	2	1	1	4	1	3	2	1	1	1	1	5	5	7	8	8	2	3	4
2220	1	2	1	3	0	1	1	3	0	2	2	1	2	1	3	0	1	1	3	0	2	2	2	2	5	4	2	2	1	1	1	2	5	4	5	3	2	5	4	5	6	2	3	2
2221	1	2	1	3	0	1	1	3	0	2	2	1	2	1	3	0	1	1	3	0	2	2	4	4	4	2	1	1	1	1	1	4	2	2	2	2	4	5	4	5	2	2	3	2
2222	1	2	1	3	0	1	1	3	0	2	2	1	2	1	3	0	1	1	3	0	2	2	3	4	5	1	1	0	1	1	1	2	4	3	4	3	3	7	4	8	2	1	3	3
2223	1	2	1	3	0	1	1	3	0	2	2	1	2	1	3	0	1	1	3	0	2	2	4	2	3	2	1	1	1	1	1	2	2	2	2	2	4	3	2	4	3	1	3	2
2224	1	2	1	3	0	1	1	3	0	2	2	1	2	1	3	0	1	1	3	0	2	2	3	4	4	2	1	1	-8	-8	-8	2	3	3	4	2	4	5	5	6	5	2	-8	2
2225	1	2	1	3	0	1	1	3	0	2	2	1	2	1	3	0	1	1	3	0	2	2	4	4	5	2	1	1	4	1	3	3	1	1	2	3	4	6	5	7	4	2	3	4
2226	1	2	1	3	0	1	1	3	0	2	2	1	2	1	3	0	1	1	3	0	2	2	2	3	4	1	0	1	4	3	4	4	4	2	4	3	5	4	5	5	5	2	3	3
2227	1	2	1	3	0	1	1	3	0	2	2	1	2	1	3	0	1	1	3	0	2	2	3	3	4	1	0	1	1	1	3	4	2	3	4	4	4	4	5	4	4	2	3	3
2228	1	2	1	3	0	1	1	3	0	2	2	1	2	1	3	0	1	1	3	0	2	2	4	1	3	2	1	1	1	1	1	4	2	2	4	2	4	4	5	4	3	3	3	4
2229	1	2	1	3	0	1	1	3	0	2	2	1	2	1	3	0	1	1	3	0	2	2	2	3	5	2	1	1	1	1	4	4	4	4	4	4	4	7	6	6	6	2	3	3
2230	1	2	1	3	0	1	1	3	0	2	2	1	2	1	3	0	1	1	3	0	2	2	3	2	3	2	1	1	3	3	-8	2	4	4	4	2	3	2	1	2	1	3	3	4
2231	1	2	1	3	0	1	1	3	0	2	2	1	2	1	3	0	1	1	3	0	2	2	2	4	4	0	0	0	2	1	3	2	4	2	4	4	5	5	4	9	5	1	3	2
2232	1	2	1	3	0	1	1	3	0	2	2	1	2	1	3	0	1	1	3	0	2	2	4	4	5	2	1	1	1	1	1	4	5	5	5	5	5	5	4	6	4	1	3	2
2233	1	2	1	3	0	1	1	3	0	2	2	1	2	1	3	0	1	1	3	0	2	2	2	5	5	1	1	0	1	1	1	4	5	4	5	1	2	6	7	6	6	1	2	5
2234	1	2	1	3	0	1	1	3	0	2	2	1	2	1	3	0	1	1	3	0	2	2	1	2	5	2	2	0	1	1	1	2	5	5	5	1	3	5	3	5	2	3	3	5
2235	1	2	1	3	0	1	1	3	0	2	2	1	2	1	3	0	1	1	3	0	2	2	4	3	3	2	1	1	1	1	1	2	4	4	4	3	4	4	4	3	3	2	3	2
2236	1	2	1	3	0	1	1	3	0	2	2	1	2	1	3	0	1	1	3	0	2	2	3	4	4	1	0	1	2	3	4	2	4	5	4	4	4	6	6	6	5	1	3	4
2237	1	2	1	3	0	1	1	3	0	2	2	1	2	1	3	0	1	1	3	0	2	2	2	4	4	1	1	0	1	1	1	2	2	3	2	2	2	5	3	7	1	1	3	2
2238	1	2	1	3	0	1	1	3	0	2	2	1	2	1	3	0	1	1	3	0	2	2	4	5	5	5	3	2	-8	-8	-8	1	4	-8	3	-8	5	5	5	5	1	1	3	3
2239	1	2	1	3	0	1	1	3	0	2	2	1	2	1	3	0	1	1	3	0	2	2	4	2	4	2	1	1	3	1	1	2	4	5	4	4	4	5	3	5	5	1	3	4
2240	1	2	1	3	0	1	1	3	0	2	2	1	2	1	3	0	1	1	3	0	2	2	4	4	4	1	0	1	1	1	1	4	4	4	4	3	4	6	3	5	6	2	3	4
2241	1	2	1	3	0	1	1	3	0	2	2	1	2	1	3	0	1	1	3	0	2	2	4	4	4	2	1	1	2	2	1	2	2	4	4	2	3	7	5	9	4	1	3	2
2242	1	2	0	3	0	1	1	3	0	2	2	1	2	0	3	0	1	1	3	0	2	2	3	4	5	2	1	1	4	3	3	2	5	5	5	4	5	5	5	5	3	1	3	2
2243	1	2	0	3	0	1	1	3	0	2	2	1	2	0	3	0	1	1	3	0	2	2	4	4	4	3	1	2	1	1	1	2	4	4	4	2	4	8	5	10	2	1	3	4
2244	1	2	0	3	0	1	1	3	0	2	2	1	2	0	3	0	1	1	3	0	2	2	3	4	5	2	1	1	1	1	1	2	4	4	4	4	4	4	3	5	2	1	3	2
2245	1	2	0	3	0	1	1	3	0	2	2	1	2	0	3	0	1	1	3	0	2	2	3	2	5	2	1	1	1	1	1	2	3	3	4	2	5	5	4	6	3	2	3	2
2246	1	2	0	3	0	1	1	3	0	2	2	1	2	0	3	0	1	1	3	0	2	2	2	4	5	2	1	1	3	3	1	3	1	1	4	2	4	5	3	6	5	2	3	1
2247	1	2	0	3	0	1	1	3	0	2	2	1	2	0	3	0	1	1	3	0	2	2	2	4	3	2	1	1	2	2	2	2	5	4	2	2	5	2	2	1	1	1	3	4
2248	1	2	0	3	0	1	1	3	0	2	2	1	2	0	3	0	1	1	3	0	2	2	4	4	4	1	1	0	-8	-8	-8	3	4	4	4	2	5	3	4	3	5	1	3	4
2249	1	2	0	3	0	1	1	3	0	2	2	1	2	0	3	0	1	1	3	0	2	2	2	4	5	2	1	1	1	1	3	2	2	2	2	2	4	5	5	5	5	1	3	2
2250	1	2	0	3	0	1	1	3	0	2	2	1	2	0	3	0	1	1	3	0	2	2	3	3	3	1	0	1	3	-8	-8	2	2	2	2	2	4	1	1	1	1	1	2	4
2251	1	2	0	3	0	1	1	3	0	2	2	1	2	0	3	0	1	1	3	0	2	2	4	4	4	2	1	1	1	1	1	2	4	4	4	2	4	2	1	3	1	1	3	3
2252	1	2	0	3	0	1	1	3	0	2	2	1	2	0	3	0	1	1	3	0	2	2	3	4	4	2	1	1	1	1	1	2	4	4	4	2	4	5	4	5	3	1	3	2
2253	1	2	0	3	0	1	1	3	0	2	2	1	2	0	3	0	1	1	3	0	2	2	5	4	5	2	1	1	3	1	1	2	4	2	4	3	2	6	4	8	1	2	3	2
2254	1	2	0	3	0	1	1	3	0	2	2	1	2	0	3	0	1	1	3	0	2	2	2	4	5	4	2	2	1	1	1	2	2	2	2	2	4	6	3	6	2	2	3	2
2255	1	2	0	3	0	1	1	3	0	2	2	1	2	0	3	0	1	1	3	0	2	2	4	5	4	1	0	1	1	1	1	4	3	3	4	3	2	5	5	6	4	2	3	4
2256	1	2	0	3	0	1	1	3	0	2	2	1	2	0	3	0	1	1	3	0	2	2	2	4	4	97	97	97	-8	-8	-8	2	3	3	3	-8	3	5	5	5	2	1	3	2
2257	1	2	0	3	0	1	1	3	0	2	2	1	2	0	3	0	1	1	3	0	2	2	4	2	5	1	1	0	1	1	1	2	1	2	4	1	5	5	5	6	3	1	3	2
2258	1	2	0	3	0	1	1	3	0	2	2	1	2	0	3	0	1	1	3	0	2	2	2	4	4	2	1	1	-8	-8	-8	2	4	4	3	3	5	4	2	4	2	2	3	4
2259	1	2	0	3	0	1	1	3	0	2	2	1	2	0	3	0	1	1	3	0	2	2	4	4	4	1	1	0	2	2	1	4	2	2	3	2	4	4	2	5	1	1	3	4
2260	1	2	0	3	0	1	1	3	0	2	2	1	2	0	3	0	1	1	3	0	2	2	3	4	4	2	1	1	1	1	1	2	2	2	2	2	4	4	4	4	4	1	3	4
2261	1	2	0	3	0	1	1	3	0	2	2	1	2	0	3	0	1	1	3	0	2	2	2	4	4	2	1	1	2	2	-8	2	2	4	4	2	4	4	2	5	2	1	3	4
2262	1	2	0	3	0	1	1	3	0	2	2	1	2	0	3	0	1	1	3	0	2	2	2	4	2	1	1	0	2	2	2	1	4	4	4	4	4	1	1	1	1	2	3	3
2263	1	2	0	3	0	1	1	3	0	2	2	1	2	0	3	0	1	1	3	0	2	2	3	2	4	1	1	0	-8	-8	-8	4	4	3	2	1	3	1	1	1	1	1	1	-8
2264	1	2	0	3	0	1	1	3	0	2	2	1	2	0	3	0	1	1	3	0	2	2	4	4	4	1	0	1	1	1	1	4	2	2	2	2	4	5	3	4	2	2	3	2
2265	1	2	0	3	0	1	1	3	0	2	2	1	2	0	3	0	1	1	3	0	2	2	2	4	4	2	1	1	1	1	1	2	5	5	5	4	4	10	10	10	10	1	3	2
2266	1	2	0	3	0	1	1	3	0	2	2	1	2	0	3	0	1	1	3	0	2	2	2	4	4	1	1	0	1	1	1	2	3	1	2	1	5	5	2	7	2	1	3	2
2267	1	2	0	3	0	1	1	3	0	2	2	1	2	0	3	0	1	1	3	0	2	2	4	4	5	3	1	2	1	1	4	2	1	1	4	2	4	4	6	6	8	1	3	2
2268	1	2	0	3	0	1	1	3	0	2	2	1	2	0	3	0	1	1	3	0	2	2	3	2	2	2	1	1	2	2	3	2	5	4	4	2	4	2	2	2	2	1	3	2
2269	1	2	0	3	0	1	1	3	0	2	2	1	2	0	3	0	1	1	3	0	2	2	4	4	4	1	1	0	2	1	3	2	4	4	4	4	5	4	3	5	3	1	3	3
2270	1	2	0	3	0	1	1	3	0	2	2	1	2	0	3	0	1	1	3	0	2	2	3	4	2	2	1	1	3	3	3	2	1	2	4	2	4	1	5	5	5	2	3	4
2271	1	2	0	3	0	1	1	3	0	2	2	1	2	0	3	0	1	1	3	0	2	2	2	4	4	3	2	1	1	1	1	2	4	2	3	3	4	5	5	5	3	2	3	2
2272	1	2	0	3	0	1	1	3	0	2	2	1	2	0	3	0	1	1	3	0	2	2	4	4	5	1	1	0	1	1	1	4	4	4	4	2	4	4	2	5	2	1	3	4
2273	1	2	0	3	0	1	1	3	0	2	2	1	2	0	3	0	1	1	3	0	2	2	3	4	4	2	1	1	1	1	1	4	4	3	4	3	3	5	4	5	3	2	3	4
2274	1	2	0	3	0	1	1	3	0	2	2	1	2	0	3	0	1	1	3	0	2	2	3	3	4	97	97	97	1	1	-8	2	3	4	5	2	4	1	1	1	1	1	3	4
2275	1	2	0	3	0	1	1	3	0	2	2	1	2	0	3	0	1	1	3	0	2	2	4	4	4	2	1	1	2	2	3	2	4	2	4	1	5	5	4	6	3	1	3	4
2276	1	2	0	3	0	1	1	3	0	2	2	1	2	0	3	0	1	1	3	0	2	2	1	1	3	0	0	0	3	3	3	1	2	3	3	3	2	3	2	3	3	2	3	3
2277	1	2	0	3	0	1	1	3	0	2	2	1	2	0	3	0	1	1	3	0	2	2	3	4	4	1	1	0	1	2	1	2	4	2	4	2	3	5	3	7	2	2	3	3
2278	1	2	0	3	0	1	1	3	0	2	2	1	2	0	3	0	1	1	3	0	2	2	5	2	3	1	1	0	2	2	2	2	5	-8	5	4	2	1	5	5	6	2	3	2
2279	1	2	0	3	0	1	1	3	0	2	2	1	2	0	3	0	1	1	3	0	2	2	3	3	5	1	1	0	1	1	1	2	4	4	4	2	4	5	4	6	5	2	3	2
2280	1	2	0	3	0	1	1	3	0	2	2	1	2	0	3	0	1	1	3	0	2	2	5	4	4	2	1	1	3	2	3	2	5	5	5	1	5	5	3	6	2	1	3	2
2281	1	2	0	3	0	1	1	3	0	2	2	1	2	0	3	0	1	1	3	0	2	2	3	4	5	1	97	97	3	1	2	2	2	1	4	2	5	5	3	7	2	2	3	2
2282	1	2	0	3	0	1	1	3	0	2	2	1	2	0	3	0	1	1	3	0	2	2	2	2	4	1	1	0	1	1	1	2	3	3	3	2	3	4	4	5	5	1	3	4
2283	1	2	0	3	0	1	1	3	0	2	2	1	2	0	3	0	1	1	3	0	2	2	3	1	4	2	1	1	3	3	1	2	5	3	4	4	4	5	4	6	5	1	3	2
2284	1	2	0	3	0	1	1	3	0	2	2	1	2	0	3	0	1	1	3	0	2	2	2	4	4	2	1	1	1	1	1	3	4	4	4	3	2	5	4	7	4	1	3	3
2285	1	2	0	3	0	1	1	3	0	2	2	1	2	0	3	0	1	1	3	0	2	2	2	4	5	2	1	1	2	1	3	2	2	2	2	2	4	5	5	5	5	1	3	4
2286	1	2	0	3	0	1	1	3	0	2	2	1	2	0	3	0	1	1	3	0	2	2	2	3	4	1	1	0	1	1	1	2	3	3	3	3	3	5	1	7	1	2	3	2
2287	1	2	0	3	0	1	1	3	0	2	2	1	2	0	3	0	1	1	3	0	2	2	4	4	4	4	3	1	1	1	1	4	4	4	3	3	4	2	2	1	2	1	3	2
2288	1	2	0	3	0	1	1	3	0	2	2	1	2	0	3	0	1	1	3	0	2	2	4	4	3	2	1	1	1	1	1	4	2	2	4	2	3	4	2	5	2	1	3	4
2289	1	2	0	3	0	1	1	3	0	2	2	1	2	0	3	0	1	1	3	0	2	2	2	2	2	2	1	1	1	1	1	4	4	3	4	3	3	4	2	5	1	1	3	3
2290	1	2	0	3	0	1	1	3	0	2	2	1	2	0	3	0	1	1	3	0	2	2	4	2	4	2	1	1	2	2	2	3	4	4	4	4	4	3	4	5	3	2	3	4
2291	1	2	0	3	0	1	1	3	0	2	2	1	2	0	3	0	1	1	3	0	2	2	5	2	3	1	1	0	-8	-8	-8	2	5	5	5	5	5	4	5	2	2	1	3	3
2292	1	2	0	3	0	1	1	3	0	2	2	1	2	0	3	0	1	1	3	0	2	2	2	4	4	2	1	1	1	1	1	2	4	4	4	4	4	10	10	10	10	1	3	2
2293	1	2	0	3	0	1	1	3	0	2	2	1	2	0	3	0	1	1	3	0	2	2	4	4	4	2	1	1	3	1	3	2	2	2	2	2	5	3	2	6	2	2	3	2
2294	1	2	0	3	0	1	1	3	0	2	2	1	2	0	3	0	1	1	3	0	2	2	3	3	4	2	1	1	2	2	2	4	3	3	2	3	3	3	4	3	3	1	3	2
2295	1	2	0	3	0	1	1	3	0	2	2	1	2	0	3	0	1	1	3	0	2	2	4	4	5	3	2	1	1	1	1	2	4	4	4	2	4	5	2	5	1	1	3	2
2296	1	2	0	3	0	1	1	3	0	2	2	1	2	0	3	0	1	1	3	0	2	2	4	2	3	2	1	1	1	1	1	2	4	3	4	3	4	1	1	2	1	1	2	2
2297	1	2	0	3	0	1	1	3	0	2	2	1	2	0	3	0	1	1	3	0	2	2	5	1	4	2	1	1	2	2	1	2	5	2	2	2	1	2	1	4	1	1	3	2
2298	1	2	0	3	0	1	1	3	0	2	2	1	2	0	3	0	1	1	3	0	2	2	3	1	1	1	97	97	1	1	1	2	5	5	5	5	3	1	5	1	5	1	3	4
2299	1	2	0	3	0	1	1	3	0	2	2	1	2	0	3	0	1	1	3	0	2	2	4	3	4	1	1	0	2	1	1	1	2	4	4	2	4	5	6	6	4	2	3	-8
2300	1	2	0	3	0	1	1	3	0	2	2	1	2	0	3	0	1	1	3	0	2	2	4	2	3	2	1	1	1	1	1	4	2	4	2	2	5	2	1	3	3	3	3	2
2301	1	2	0	3	0	1	1	3	0	2	2	1	2	0	3	0	1	1	3	0	2	2	2	4	4	2	1	1	1	1	1	2	5	5	5	2	3	5	5	5	5	1	3	2
2302	1	2	0	3	0	1	1	3	0	2	2	1	2	0	3	0	1	1	3	0	2	2	3	4	4	2	1	1	1	1	1	1	4	4	4	2	4	4	3	5	3	2	3	4
2303	1	2	0	3	0	1	1	3	0	2	2	1	2	0	3	0	1	1	3	0	2	2	3	2	2	4	2	2	2	2	-8	4	2	2	4	2	4	2	2	2	2	1	3	4
2304	1	2	0	3	0	1	1	3	0	2	2	1	2	0	3	0	1	1	3	0	2	2	4	5	4	2	1	1	1	1	1	2	2	2	2	2	4	7	4	5	4	1	3	2
2305	1	2	0	3	0	1	1	3	0	2	2	1	2	0	3	0	1	1	3	0	2	2	4	4	4	2	1	1	3	1	1	2	5	5	5	1	5	1	1	2	1	1	3	4
2306	1	2	0	3	0	1	1	3	0	2	2	1	2	0	3	0	1	1	3	0	2	2	3	4	4	2	1	1	1	1	1	4	4	3	4	2	4	5	4	6	4	1	3	3
2307	1	2	0	3	0	1	1	3	0	2	2	1	2	0	3	0	1	1	3	0	2	2	4	2	4	2	1	1	1	1	1	4	4	4	2	3	3	5	4	6	4	1	3	4
2308	1	2	0	3	0	1	1	3	0	2	2	1	2	0	3	0	1	1	3	0	2	2	4	4	3	1	1	0	1	1	1	1	3	4	4	3	4	4	3	5	1	1	3	-8
2309	1	2	0	3	0	1	1	3	0	2	2	1	2	0	3	0	1	1	3	0	2	2	2	4	4	2	1	1	1	1	1	2	4	4	2	2	4	5	5	5	2	2	3	4
2310	1	2	0	3	0	1	1	3	0	2	2	1	2	0	3	0	1	1	3	0	2	2	4	3	4	1	1	0	2	2	2	2	2	2	2	2	4	6	3	8	4	1	3	4
2311	1	2	0	3	0	1	2	3	0	2	2	1	2	0	3	0	1	2	3	0	2	2	2	4	5	2	1	1	4	2	1	2	2	2	2	2	4	4	3	7	4	2	3	2
2312	1	2	0	3	0	1	2	3	0	2	2	1	2	0	3	0	1	2	3	0	2	2	2	5	5	8	5	3	1	1	1	2	4	3	4	4	4	2	1	2	1	2	2	2
2313	1	2	0	3	0	1	2	3	0	2	2	1	2	0	3	0	1	2	3	0	2	2	3	4	5	2	1	1	2	2	1	4	2	2	2	2	5	5	4	6	3	1	3	2
2314	1	2	0	3	0	1	2	3	0	2	2	1	2	0	3	0	1	2	3	0	2	2	4	4	5	1	1	0	1	1	1	4	3	3	2	4	4	6	5	7	4	2	3	2
2315	1	2	0	3	0	1	2	3	0	2	2	1	2	0	3	0	1	2	3	0	2	2	4	4	3	1	0	1	2	1	1	2	4	4	4	3	5	4	3	6	2	1	-8	4
2316	1	2	0	3	0	1	2	3	0	2	2	1	2	0	3	0	1	2	3	0	2	2	3	2	3	1	0	1	2	2	2	4	4	4	4	3	4	5	3	7	1	2	-8	4
2317	1	2	0	3	0	1	2	3	0	2	2	1	2	0	3	0	1	2	3	0	2	2	3	2	4	2	1	1	3	3	3	2	4	4	4	2	4	3	3	3	3	2	3	4
2318	1	2	0	3	0	1	2	3	0	2	2	1	2	0	3	0	1	2	3	0	2	2	2	4	5	4	2	2	1	1	1	2	5	5	4	1	5	5	5	6	2	2	3	2
2319	1	2	0	3	0	1	2	3	0	2	2	1	2	0	3	0	1	2	3	0	2	2	4	4	4	1	1	0	1	1	1	2	4	4	4	3	4	5	6	6	5	2	3	4
2320	1	2	0	3	0	1	2	3	0	2	2	1	2	0	3	0	1	2	3	0	2	2	3	4	5	2	1	1	1	1	1	4	3	3	3	3	3	2	1	2	1	1	3	3
2321	1	2	0	3	0	1	2	3	0	2	2	1	2	0	3	0	1	2	3	0	2	2	3	4	4	2	1	1	1	1	1	3	4	4	4	3	4	10	1	10	1	1	3	2
2322	1	2	0	3	0	1	2	3	0	2	2	1	2	0	3	0	1	2	3	0	2	2	2	4	3	2	1	1	1	1	1	2	4	4	4	4	4	1	1	1	1	1	3	2
2323	1	2	0	3	0	1	2	3	0	2	2	1	2	0	3	0	1	2	3	0	2	2	2	4	5	1	-2	-2	2	1	-8	2	4	4	2	1	5	5	1	8	3	3	3	2
2324	1	2	0	3	0	1	2	3	0	2	2	1	2	0	3	0	1	2	3	0	2	2	2	4	3	2	1	1	-8	-8	-8	4	2	2	1	2	5	2	2	5	2	1	3	3
2325	1	2	0	3	0	1	2	3	0	2	2	1	2	0	3	0	1	2	3	0	2	2	3	4	4	97	97	97	-8	-8	-8	2	4	4	4	-8	4	5	5	6	1	2	3	3
2326	1	2	0	3	0	1	2	3	0	2	2	1	2	0	3	0	1	2	3	0	2	2	3	4	4	2	1	1	1	1	1	4	3	3	3	3	3	1	1	1	1	1	3	3
2327	1	2	0	3	0	1	2	3	0	2	2	1	2	0	3	0	1	2	3	0	2	2	2	4	5	2	2	0	-8	-8	-8	1	5	3	5	3	5	4	2	4	2	1	3	5
2328	1	2	0	3	0	1	2	3	0	2	2	1	2	0	3	0	1	2	3	0	2	2	2	4	5	2	1	1	2	1	3	2	4	3	3	2	4	3	2	5	2	1	3	4
2329	1	2	0	3	0	1	2	3	0	2	2	1	2	0	3	0	1	2	3	0	2	2	3	4	4	97	97	97	-8	-8	-8	2	4	4	3	-8	4	1	4	3	4	1	3	3
2330	1	2	0	3	0	1	2	3	0	2	2	1	2	0	3	0	1	2	3	0	2	2	4	4	5	3	3	0	1	1	1	2	4	3	4	3	4	5	3	5	2	1	3	2
2331	1	2	0	3	0	1	2	3	0	2	2	1	2	0	3	0	1	2	3	0	2	2	5	4	5	2	1	1	1	1	1	4	2	2	3	2	4	2	1	3	1	1	3	4
2332	1	2	0	3	0	1	2	3	0	2	2	1	2	0	3	0	1	2	3	0	2	2	2	4	4	2	1	1	3	1	3	2	4	4	3	4	4	6	5	7	5	2	3	4
2333	1	2	0	3	0	1	2	3	0	2	2	1	2	0	3	0	1	2	3	0	2	2	4	4	4	2	1	1	2	2	1	2	1	4	4	3	2	2	1	6	1	2	-8	3
2334	1	2	0	3	0	1	2	3	0	2	2	1	2	0	3	0	1	2	3	0	2	2	2	4	4	1	1	0	2	2	-8	2	2	2	2	2	4	2	2	2	2	2	3	4
2335	1	2	0	3	0	1	2	3	0	2	2	1	2	0	3	0	1	2	3	0	2	2	3	4	5	2	1	1	1	1	1	3	4	4	2	3	4	4	2	2	1	1	3	4
2336	1	2	0	3	0	1	2	3	0	2	2	1	2	0	3	0	1	2	3	0	2	2	4	2	4	2	1	1	2	1	1	4	2	1	2	2	4	5	4	5	4	1	3	2
2337	1	2	0	3	0	1	2	3	0	2	2	1	2	0	3	0	1	2	3	0	2	2	2	4	5	1	1	0	4	1	4	2	2	2	2	3	4	3	2	3	2	2	3	4
2338	1	2	0	3	0	1	2	3	0	2	2	1	2	0	3	0	1	2	3	0	2	2	4	2	4	-3	-3	-3	-8	-8	-8	2	4	2	4	-8	5	1	1	5	-8	1	3	1
2339	1	2	0	3	0	1	2	3	0	2	2	1	2	0	3	0	1	2	3	0	2	2	4	4	4	2	1	1	1	1	1	4	4	4	4	2	4	5	4	5	3	1	3	2
2340	1	2	0	3	0	1	2	3	0	2	2	1	2	0	3	0	1	2	3	0	2	2	3	2	4	2	1	1	3	2	1	2	4	2	3	2	2	4	3	6	4	1	3	2
2341	1	2	0	3	0	1	2	3	0	2	2	1	2	0	3	0	1	2	3	0	2	2	2	4	5	1	0	1	2	1	1	2	4	4	4	2	4	1	1	1	1	2	3	4
2342	1	2	0	3	0	1	2	3	0	2	2	1	2	0	3	0	1	2	3	0	2	2	1	4	4	1	0	1	1	1	1	3	1	2	2	2	1	5	5	5	5	2	3	1
2343	1	2	0	3	0	1	2	3	0	2	2	1	2	0	3	0	1	2	3	0	2	2	4	4	5	1	0	1	1	1	1	2	4	1	4	1	4	6	6	8	5	1	3	2
2344	1	2	0	3	0	1	2	3	0	2	2	1	2	0	3	0	1	2	3	0	2	2	4	4	4	2	1	1	2	2	2	3	4	3	5	3	4	5	3	7	1	1	-8	2
2345	1	2	0	3	0	1	2	3	0	2	2	1	2	0	3	0	1	2	3	0	2	2	4	4	5	2	1	1	2	2	2	2	4	4	4	3	2	5	4	6	4	1	3	2
2346	1	2	0	3	0	1	2	3	0	2	2	1	2	0	3	0	1	2	3	0	2	2	4	3	5	2	1	1	2	1	1	2	1	4	4	4	5	7	4	7	4	1	3	4
2347	1	2	0	3	0	1	2	3	0	2	2	1	2	0	3	0	1	2	3	0	2	2	2	4	2	3	2	1	2	2	2	1	4	4	4	4	4	5	3	-8	1	1	-8	2
2348	1	2	0	3	0	1	2	3	0	2	2	1	2	0	3	0	1	2	3	0	2	2	2	4	5	2	1	1	2	1	3	2	2	2	2	4	5	5	3	7	3	1	3	2
2349	1	2	0	3	0	1	2	3	0	2	2	1	2	0	3	0	1	2	3	0	2	2	4	4	5	1	1	0	1	1	1	4	2	2	2	2	4	7	4	9	1	1	3	2
2350	1	2	0	3	0	1	2	3	0	2	2	1	2	0	3	0	1	2	3	0	2	2	3	4	4	2	1	1	4	1	1	2	3	2	4	2	4	5	3	8	3	2	-8	3
2351	1	2	0	3	0	1	2	3	0	2	2	1	2	0	3	0	1	2	3	0	2	2	2	3	2	2	1	1	-8	-8	-8	2	5	4	2	-8	4	1	1	4	4	1	3	3
2352	1	2	0	3	0	1	2	3	0	2	2	1	2	0	3	0	1	2	3	0	2	2	4	4	5	2	1	1	1	1	1	2	5	5	5	3	4	6	3	6	2	1	3	2
2353	1	2	0	3	0	1	2	3	0	2	2	1	2	0	3	0	1	2	3	0	2	2	1	4	3	2	1	1	2	1	1	2	5	2	4	2	4	2	2	2	1	1	3	3
2354	1	2	0	3	0	1	2	3	0	2	2	1	2	0	3	0	1	2	3	0	2	2	1	4	4	2	1	1	1	1	1	1	1	2	1	1	5	5	5	6	1	1	3	1
2355	1	2	0	3	0	1	2	3	0	2	2	1	2	0	3	0	1	2	3	0	2	2	4	4	5	1	97	97	1	1	1	2	4	4	4	2	3	5	3	5	2	1	3	2
2356	1	2	0	3	0	1	2	3	0	2	2	1	2	0	3	0	1	2	3	0	2	2	2	4	4	2	1	1	1	1	1	2	4	4	4	4	3	4	3	5	3	1	3	5
2357	1	2	0	3	0	1	2	3	0	2	2	1	2	0	3	0	1	2	3	0	2	2	3	4	4	1	1	0	2	1	2	2	4	4	4	4	2	4	4	4	4	1	3	4
2358	1	2	0	3	0	1	2	3	0	2	2	1	2	0	3	0	1	2	3	0	2	2	4	4	5	2	1	1	1	1	1	4	4	4	4	4	4	6	4	7	2	2	3	4
2359	1	2	0	3	0	1	2	3	0	2	2	1	2	0	3	0	1	2	3	0	2	2	3	4	5	2	1	1	1	1	3	2	4	2	2	2	4	6	5	7	4	1	3	3
2360	1	2	0	3	0	1	2	3	0	2	2	1	2	0	3	0	1	2	3	0	2	2	4	4	5	2	2	0	1	1	1	4	2	2	2	2	4	2	1	2	1	1	3	4
2361	1	2	0	3	0	1	2	3	0	2	2	1	2	0	3	0	1	2	3	0	2	2	3	4	4	1	0	1	2	1	1	2	3	2	3	3	5	1	1	1	1	3	3	4
2362	1	2	0	3	0	1	2	3	0	2	2	1	2	0	3	0	1	2	3	0	2	2	4	4	4	1	0	1	2	2	2	2	5	5	5	1	5	1	1	2	1	1	3	2
2363	1	2	0	3	0	1	2	3	0	2	2	1	2	0	3	0	1	2	3	0	2	2	4	2	4	2	1	1	1	1	1	4	2	2	2	2	3	4	3	4	2	2	3	3
2364	1	2	0	3	0	1	2	3	0	2	2	1	2	0	3	0	1	2	3	0	2	2	5	4	4	3	2	1	1	1	1	2	4	4	4	4	4	3	3	3	3	1	3	2
2365	1	2	0	3	0	1	2	3	0	2	2	1	2	0	3	0	1	2	3	0	2	2	2	2	4	3	1	2	2	2	3	2	5	5	5	1	5	5	3	7	1	2	3	2
2366	1	2	0	3	0	1	2	3	0	2	2	1	2	0	3	0	1	2	3	0	2	2	2	4	4	2	1	1	-8	-8	-8	4	4	4	2	-8	4	5	5	6	5	1	-8	2
2367	1	2	0	3	0	1	2	3	0	2	2	1	2	0	3	0	1	2	3	0	2	2	2	4	4	1	1	0	-8	-8	-8	2	4	4	4	-8	4	10	1	9	5	2	3	2
2368	1	2	0	3	0	1	2	3	0	2	2	1	2	0	3	0	1	2	3	0	2	2	4	4	3	2	1	1	1	1	1	4	3	3	3	3	3	4	3	4	4	1	3	3
2369	1	2	0	3	0	1	2	3	0	2	2	1	2	0	3	0	1	2	3	0	2	2	1	4	4	2	1	1	5	1	1	4	5	1	5	1	5	1	1	2	2	1	3	1
2370	1	2	0	3	0	1	2	3	0	2	2	1	2	0	3	0	1	2	3	0	2	2	4	4	4	1	0	1	1	1	1	3	2	1	1	1	4	8	9	7	7	1	3	1
2371	1	2	0	3	0	1	2	3	0	2	2	1	2	0	3	0	1	2	3	0	2	2	4	2	3	2	1	1	4	2	3	2	4	2	4	4	4	3	3	4	2	2	3	4
2372	1	2	0	3	0	1	2	3	0	2	2	1	2	0	3	0	1	2	3	0	2	2	1	4	4	2	1	1	-8	-8	-8	1	5	5	-8	4	5	1	1	5	1	2	3	1
2373	1	2	0	3	0	1	2	3	0	2	2	1	2	0	3	0	1	2	3	0	2	2	-8	3	2	4	2	2	1	1	1	1	5	1	1	1	5	1	1	1	1	2	3	4
2374	1	2	0	3	0	1	2	3	0	2	2	1	2	0	3	0	1	2	3	0	2	2	4	4	3	1	1	0	2	1	1	2	3	4	1	1	4	1	2	2	1	2	3	2
2375	1	2	0	3	0	1	2	3	0	2	2	1	2	0	3	0	1	2	3	0	2	2	1	4	4	1	1	0	3	3	-8	2	5	4	4	2	4	4	4	4	1	1	3	2
2376	1	2	0	3	0	1	2	3	0	2	2	1	2	0	3	0	1	2	3	0	2	2	4	2	4	2	1	1	3	1	3	4	1	2	2	1	4	4	7	6	7	2	3	2
2377	1	2	0	3	0	1	2	3	0	2	2	1	2	0	3	0	1	2	3	0	2	2	3	4	3	2	97	97	1	2	-8	4	4	4	2	-8	3	4	3	4	1	1	2	-8
2378	1	2	0	3	0	1	2	3	0	2	2	1	2	0	3	0	1	2	3	0	2	2	4	3	5	1	97	97	1	1	1	2	5	5	2	3	5	4	2	6	6	2	3	-8
2379	1	2	0	3	0	1	2	3	0	2	2	1	2	0	3	0	1	2	3	0	2	2	5	2	4	2	1	1	2	1	2	2	4	1	2	2	5	5	5	7	3	3	3	5
2380	1	2	0	3	0	1	2	3	0	2	2	1	2	0	3	0	1	2	3	0	2	2	1	4	1	1	0	1	-8	-8	-8	2	4	4	-8	-8	5	6	5	10	4	2	3	3
2381	1	2	0	3	0	1	2	3	0	2	2	1	2	0	3	0	1	2	3	0	2	2	5	4	4	3	1	2	1	1	1	1	4	4	4	4	3	5	2	6	3	1	3	3
2382	1	2	0	3	0	1	2	3	0	2	2	1	2	0	3	0	1	2	3	0	2	2	4	4	4	1	0	1	4	2	2	4	4	4	4	4	4	5	5	5	5	2	3	3
2383	1	2	0	3	0	1	2	3	0	2	2	1	2	0	3	0	1	2	3	0	2	2	3	3	3	2	1	1	2	2	2	2	3	4	4	4	4	5	5	5	5	2	3	3
2384	1	2	0	3	0	1	2	3	0	2	2	1	2	0	3	0	1	2	3	0	2	2	4	5	4	2	1	1	2	5	1	2	4	5	5	4	5	5	5	5	5	3	2	2
2385	1	2	0	3	0	1	2	3	0	2	2	1	2	0	3	0	1	2	3	0	2	2	5	3	5	1	97	97	1	1	-8	2	5	3	5	1	3	3	3	-8	1	1	3	1
2386	1	2	0	3	0	1	2	3	0	2	2	1	2	0	3	0	1	2	3	0	2	2	4	4	4	2	0	2	1	1	1	2	4	2	4	2	4	5	5	5	2	1	3	3
2387	1	2	0	3	0	1	2	3	0	2	2	1	2	0	3	0	1	2	3	0	2	2	3	3	4	2	1	1	1	1	1	2	1	4	2	2	4	4	3	5	2	1	3	3
2388	1	2	0	3	0	1	2	3	0	2	2	1	2	0	3	0	1	2	3	0	2	2	4	4	3	2	1	1	1	1	1	4	1	1	2	2	4	1	1	1	1	2	3	1
2389	1	2	0	3	0	1	2	3	0	2	2	1	2	0	3	0	1	2	3	0	2	2	2	4	5	2	2	0	-8	-8	-8	2	4	2	4	4	4	7	6	6	3	1	3	4
2390	1	2	0	3	0	1	2	3	0	2	0	1	2	0	3	0	1	2	3	0	2	0	3	4	4	2	1	1	3	1	1	3	2	4	4	2	5	-8	5	7	2	2	2	2
2391	1	2	0	3	0	1	2	3	0	2	0	1	2	0	3	0	1	2	3	0	2	0	2	2	5	-2	-2	-2	-8	-8	-8	4	-8	-8	-8	-8	5	3	2	3	2	2	3	3
2392	1	2	0	3	0	1	2	3	0	2	0	1	2	0	3	0	1	2	3	0	2	0	4	4	2	2	0	2	2	3	-8	2	2	1	1	1	5	1	1	10	6	2	3	1
2393	1	2	0	3	0	1	2	3	0	2	0	1	2	0	3	0	1	2	3	0	2	0	1	5	4	0	0	0	3	1	1	-8	5	5	1	5	5	-8	-8	-8	-8	1	3	2
2394	1	2	0	3	0	1	2	3	0	2	0	1	2	0	3	0	1	2	3	0	2	0	2	4	4	2	1	1	4	1	1	1	5	5	1	1	5	1	1	1	1	1	3	3
2395	1	2	0	3	0	1	2	3	0	2	0	1	2	0	3	0	1	2	3	0	2	0	4	5	4	1	0	1	5	5	5	3	5	5	5	5	5	4	6	5	5	2	3	5
2396	1	2	0	3	0	1	2	3	0	2	0	1	2	0	3	0	1	2	3	0	2	0	2	4	4	2	1	1	1	1	1	2	5	4	5	2	5	3	3	3	1	1	3	5
2397	1	2	0	3	0	1	2	3	0	2	0	1	2	0	3	0	1	2	3	0	2	0	4	3	4	2	1	1	1	1	1	2	2	2	2	2	4	5	4	5	3	2	2	4
2398	1	2	0	3	0	1	2	3	0	2	0	1	2	0	3	0	1	2	3	0	2	0	1	4	1	4	1	3	1	1	1	1	5	5	5	5	1	1	1	1	1	3	3	2
2399	1	2	0	3	0	1	2	3	0	2	0	1	2	0	3	0	1	2	3	0	2	0	4	4	5	2	1	1	1	1	1	4	4	2	2	1	5	5	1	7	1	1	3	4
2400	1	2	0	3	0	1	2	3	0	2	0	1	2	0	3	0	1	2	3	0	2	0	4	3	4	1	97	97	2	1	1	4	4	4	5	4	5	4	1	4	2	2	2	-8
2401	1	2	0	3	0	1	2	3	0	2	0	1	2	0	3	0	1	2	3	0	2	0	4	3	4	4	2	2	-8	-8	-8	4	4	2	4	4	3	1	1	2	1	1	3	3
2402	1	2	0	3	0	1	2	3	0	2	0	1	2	0	3	0	1	2	3	0	2	0	3	4	5	2	1	1	1	1	1	4	5	1	1	1	5	6	4	7	2	1	3	1
2403	1	2	0	3	0	1	2	3	0	2	0	1	2	0	3	0	1	2	3	0	2	0	2	4	4	1	1	0	1	1	1	4	4	2	4	2	4	1	1	1	1	3	3	3
2404	1	2	0	3	0	1	2	3	0	2	0	1	2	0	3	0	1	2	3	0	2	0	5	1	5	1	1	0	1	1	1	4	2	2	4	1	4	4	4	8	1	1	3	3
2405	1	2	0	3	0	1	2	3	0	2	0	1	2	0	3	0	1	2	3	0	2	0	2	4	4	1	0	1	1	1	1	2	4	3	1	1	4	1	1	4	5	2	3	2
2406	1	2	0	3	0	1	2	3	0	2	0	1	2	0	3	0	1	2	3	0	2	0	2	2	5	1	97	97	3	1	1	2	2	2	1	2	4	3	3	6	3	3	3	4
2407	1	2	0	3	0	1	2	3	0	2	0	1	2	0	3	0	1	2	3	0	2	0	2	4	4	8	97	97	4	1	1	4	4	2	4	4	4	5	4	3	2	1	3	2
2408	1	2	0	3	0	1	2	3	0	2	0	1	2	0	3	0	1	2	3	0	2	0	2	3	2	2	2	0	1	1	2	2	4	4	3	3	4	4	3	3	2	1	3	3
2409	1	2	0	3	0	1	2	3	0	2	0	1	2	0	3	0	1	2	3	0	2	0	2	2	4	3	0	3	2	2	1	2	4	4	4	4	4	5	3	6	3	1	3	2
2410	1	2	0	3	0	1	2	3	0	2	0	1	2	0	3	0	1	2	3	0	2	0	3	4	5	3	2	1	-8	-8	-8	2	5	3	-8	-8	3	-8	-8	-8	-8	2	3	-8
2411	1	2	0	3	0	1	2	3	0	2	0	1	2	0	3	0	1	2	3	0	2	0	2	-8	4	-2	-2	-2	2	-8	-8	-8	4	4	5	-8	2	4	3	-8	1	1	3	-8
2412	1	2	0	3	0	1	2	3	0	2	0	1	2	0	3	0	1	2	3	0	2	0	5	2	3	1	97	97	1	1	-8	1	5	5	5	2	5	3	5	1	5	2	3	-8
2413	1	2	0	3	0	1	2	3	0	2	0	1	2	0	3	0	1	2	3	0	2	0	1	4	4	2	0	2	1	1	1	4	5	5	5	1	5	1	8	8	1	2	3	1
2414	1	2	0	3	0	1	2	3	0	2	0	1	2	0	3	0	1	2	3	0	2	0	2	4	5	2	1	1	3	1	1	2	2	2	2	2	2	1	1	7	6	2	3	2
2415	1	2	0	3	0	1	2	3	1	2	0	1	2	0	3	0	1	2	3	1	2	0	2	4	5	2	97	97	1	1	1	2	5	3	5	3	5	6	5	6	5	1	3	2
2416	1	2	0	3	0	1	2	3	1	2	0	1	2	0	3	0	1	2	3	1	2	0	2	1	1	1	0	1	2	1	1	1	4	4	3	4	4	1	1	1	1	2	3	2
2417	1	2	0	3	0	1	2	3	1	2	0	1	2	0	3	0	1	2	3	1	2	0	5	1	3	2	1	1	1	1	1	2	4	5	4	1	5	3	1	8	1	1	3	5
2418	1	2	0	3	0	1	2	3	1	2	0	1	2	0	3	0	1	2	3	1	2	0	3	3	4	2	0	2	3	1	3	2	4	1	3	1	5	4	4	6	4	1	3	3
2419	1	2	0	3	0	1	2	3	1	2	0	1	2	0	3	0	1	2	3	1	2	0	4	4	4	1	97	97	3	1	1	2	1	4	1	2	4	5	3	9	5	1	3	4
2420	1	2	0	3	0	1	2	3	1	2	0	1	2	0	3	0	1	2	3	1	2	0	2	3	2	1	1	0	1	1	1	4	2	2	4	1	4	1	1	3	1	2	3	4
2421	1	2	0	3	0	1	2	3	1	2	0	1	2	0	3	0	1	2	3	1	2	0	4	3	3	2	1	1	1	1	1	4	5	4	2	2	4	1	1	1	1	2	3	5
2422	1	2	0	3	0	1	2	3	1	2	0	1	2	0	3	0	1	2	3	1	2	0	1	5	4	2	1	1	1	1	1	1	4	5	5	4	2	5	1	5	1	2	3	2
2423	1	2	0	3	0	1	2	3	1	2	0	1	2	0	3	0	1	2	3	1	2	0	3	4	3	3	3	0	1	1	1	2	4	3	4	3	3	3	2	4	2	2	3	2
2424	1	2	0	3	0	1	2	3	1	2	0	1	2	0	3	0	1	2	3	1	2	0	2	4	4	2	0	2	4	1	1	4	5	3	3	1	5	3	1	4	2	1	3	5
2425	1	2	0	3	0	1	2	3	1	2	0	1	2	0	3	0	1	2	3	1	2	0	4	3	4	1	0	1	2	1	2	2	4	3	4	1	3	1	1	5	6	1	3	1
2426	1	2	0	3	0	1	2	3	1	2	0	1	2	0	3	0	1	2	3	1	2	0	2	4	3	1	97	97	3	-8	-8	4	4	-8	3	2	3	5	4	5	1	1	3	1
2427	1	2	0	3	0	1	2	3	1	2	0	1	2	0	3	0	1	2	3	1	2	0	3	3	5	1	97	97	1	1	1	4	5	1	4	4	4	5	-8	9	3	2	3	5
2428	1	2	0	3	0	1	2	3	1	2	0	1	2	0	3	0	1	2	3	1	2	0	3	4	4	2	1	1	4	2	1	2	2	2	2	2	4	4	1	4	5	2	3	4
2429	1	2	0	3	0	1	2	3	1	2	0	1	2	0	3	0	1	2	3	1	2	0	5	1	2	2	1	1	4	3	3	4	1	1	1	1	4	3	4	5	5	2	3	4
2430	1	2	0	3	0	1	2	3	1	2	0	1	2	0	3	0	1	2	3	1	2	0	1	4	4	2	1	1	1	2	-8	2	2	5	1	5	5	2	1	4	1	1	3	1
2431	1	2	0	3	0	1	2	3	1	2	0	1	2	0	3	0	1	2	3	1	2	0	-8	4	4	1	1	0	1	1	1	1	5	5	5	1	1	1	1	1	1	1	3	1
2432	1	2	0	3	0	1	2	3	1	2	0	1	2	0	3	0	1	2	3	1	2	0	4	3	4	2	1	1	3	3	-8	4	3	3	3	3	5	1	1	1	1	1	3	3
2433	1	2	0	3	0	1	2	3	1	2	0	1	2	0	3	0	1	2	3	1	2	0	4	2	3	2	1	1	1	1	1	4	2	2	2	2	4	5	5	5	6	2	3	4
2434	1	2	0	3	0	1	2	3	1	2	0	1	2	0	3	0	1	2	3	1	2	0	4	2	5	2	1	1	1	1	1	4	4	4	4	1	4	5	5	6	3	1	3	2
2435	1	2	0	3	0	1	2	3	1	2	2	1	2	0	3	0	1	2	3	1	2	2	2	4	4	2	0	2	1	1	1	2	4	4	3	3	3	4	3	4	2	1	3	2
2436	1	2	0	3	0	1	2	3	1	2	2	1	2	0	3	0	1	2	3	1	2	2	5	1	2	0	0	0	3	1	1	4	2	4	2	4	4	1	1	-8	1	2	3	4
2437	1	2	0	3	0	1	2	3	1	2	2	1	2	0	3	0	1	2	3	1	2	2	2	3	4	2	1	1	3	2	1	2	3	2	1	1	3	5	5	5	5	2	3	2
2438	1	2	0	3	0	1	2	3	1	2	2	1	2	0	3	0	1	2	3	1	2	2	4	3	3	1	97	97	2	1	1	4	1	2	2	2	2	1	1	9	2	2	3	2
2439	1	2	0	3	0	1	2	3	1	2	2	1	2	0	3	0	1	2	3	1	2	2	4	3	4	2	97	97	3	-8	-8	4	4	3	2	1	5	4	4	6	3	1	3	1
2440	1	2	0	3	0	1	2	3	1	2	2	1	2	0	3	0	1	2	3	1	2	2	5	4	4	2	2	0	1	1	1	1	1	1	2	2	2	5	1	4	4	2	2	2
2441	1	2	0	3	0	1	2	3	1	2	2	1	2	0	3	0	1	2	3	1	2	2	4	4	5	1	97	97	1	1	1	3	5	5	5	3	5	5	1	5	1	2	3	2
2442	1	2	0	3	0	1	2	3	1	2	2	1	2	0	3	0	1	2	3	1	2	2	4	3	5	3	1	2	3	1	1	2	5	1	4	1	4	5	5	8	2	3	3	5
2443	1	2	0	3	0	1	2	3	1	2	2	1	2	0	3	0	1	2	3	1	2	2	2	2	2	2	1	1	4	1	1	2	2	1	4	1	3	5	3	8	3	2	3	2
2444	1	2	0	3	0	1	2	3	1	2	2	1	2	0	3	0	1	2	3	1	2	2	2	5	4	4	1	3	1	1	1	3	4	2	5	2	5	1	6	1	1	1	1	1
2445	1	2	0	3	0	1	2	3	1	2	2	1	2	0	3	0	1	2	3	1	2	2	4	3	5	4	2	2	2	1	2	4	4	4	2	1	5	7	6	8	3	1	3	1
2446	1	2	0	3	0	1	2	3	1	2	2	1	2	0	3	0	1	2	3	1	2	2	2	2	4	2	1	1	1	1	1	4	5	5	2	1	4	3	1	6	1	2	3	4
2447	1	2	0	3	0	1	2	3	1	2	2	1	2	0	3	0	1	2	3	1	2	2	2	2	4	3	2	1	2	2	2	4	4	2	4	3	4	4	3	4	2	1	3	3
2448	1	2	0	3	0	1	2	3	1	2	2	1	2	0	3	0	1	2	3	1	2	2	4	2	4	2	1	1	5	1	5	2	1	5	2	4	5	4	2	5	3	2	3	2
2449	1	2	0	3	0	1	2	3	1	2	2	1	2	0	3	0	1	2	3	1	2	2	2	4	2	1	1	0	1	1	1	1	5	5	5	1	5	3	4	3	4	1	3	5
2450	1	2	0	3	0	1	2	3	1	2	2	1	2	0	3	0	1	2	3	1	2	2	4	3	4	3	0	3	1	1	1	1	4	4	1	4	2	4	2	-8	1	2	3	-8
2451	1	2	0	3	0	1	2	3	1	2	2	1	2	0	3	0	1	2	3	1	2	2	2	3	2	2	97	97	1	2	2	4	4	4	4	3	4	5	4	6	4	1	3	2
2452	1	2	0	3	0	1	2	3	1	2	2	1	2	0	3	0	1	2	3	1	2	2	5	1	3	2	1	1	3	1	1	2	3	2	5	2	3	1	5	1	6	2	3	2
2453	1	2	0	3	0	1	2	3	1	2	2	1	2	0	3	0	1	2	3	1	2	2	3	4	4	0	0	0	1	1	1	2	2	2	4	4	4	1	1	8	1	1	3	2
2454	1	2	0	3	0	1	2	3	1	2	2	1	2	0	3	0	1	2	3	1	2	2	4	2	4	2	2	0	2	1	1	2	4	3	2	2	2	2	4	2	2	1	3	4
2455	1	2	0	3	0	1	2	3	1	2	2	1	2	0	3	0	1	2	3	1	2	2	2	5	5	2	1	1	1	1	1	2	4	4	2	5	5	3	4	3	1	1	3	1
2456	1	2	0	3	0	1	2	3	1	2	2	1	2	0	3	0	1	2	3	1	2	2	4	4	4	2	97	97	-8	-8	-8	2	4	3	-8	2	3	6	4	6	2	2	3	3
2457	1	2	0	3	0	1	2	3	1	2	2	1	2	0	3	0	1	2	3	1	2	2	4	2	4	2	1	1	5	1	1	4	4	4	4	2	2	4	5	7	5	2	3	2
2458	1	2	0	3	0	1	2	3	1	2	2	1	2	0	3	0	1	2	3	1	2	2	2	4	5	1	1	0	1	1	1	2	5	2	-8	4	5	2	1	4	1	2	3	-8
2459	1	2	0	3	0	1	2	3	1	2	2	1	2	0	3	0	1	2	3	1	2	2	4	2	3	2	1	1	1	1	1	2	4	4	5	-8	4	1	1	5	1	1	3	2
2460	1	2	0	3	0	1	2	3	1	2	2	1	2	0	3	0	1	2	3	1	2	2	3	4	4	1	97	97	1	1	1	2	4	5	2	2	4	3	2	5	3	2	3	1
2461	1	2	0	3	0	1	2	3	1	2	2	1	2	0	3	0	1	2	3	1	2	2	4	3	5	2	1	1	3	3	2	4	2	3	2	1	2	5	5	3	2	1	3	3
2462	1	2	0	3	0	1	2	3	1	2	2	1	2	0	3	0	1	2	3	1	2	2	4	3	4	1	97	97	1	1	1	2	2	2	4	2	2	1	1	2	1	1	3	3
2463	1	2	0	3	0	1	2	3	1	2	2	1	2	0	3	0	1	2	3	1	2	2	3	1	2	1	97	97	3	-8	3	2	3	2	-8	-8	-8	4	5	4	4	2	3	-8
2464	1	2	0	3	0	1	2	3	1	2	2	1	2	0	3	0	1	2	3	1	2	2	4	4	3	2	1	1	2	2	2	4	3	2	4	4	4	1	1	1	1	2	3	4
2465	1	2	0	3	0	1	2	3	1	2	2	1	2	0	3	0	1	2	3	1	2	2	4	4	4	2	1	1	2	1	1	2	1	1	1	1	4	5	4	7	3	2	1	5
2466	1	2	0	3	0	1	2	3	1	2	2	1	2	0	3	0	1	2	3	1	2	2	2	4	4	2	1	1	2	2	1	2	2	2	4	2	3	4	3	4	2	1	3	3
2467	1	2	0	3	0	1	2	3	1	2	2	1	2	0	3	0	1	2	3	1	2	2	4	4	4	2	1	1	1	1	1	4	4	4	4	2	4	4	2	6	1	2	3	2
2468	1	2	0	3	0	1	2	3	1	2	2	1	2	0	3	0	1	2	3	1	2	2	3	5	4	1	0	1	4	1	3	4	1	1	3	1	5	5	4	7	4	2	3	3
2469	1	2	0	3	0	1	2	3	1	2	2	1	2	0	3	0	1	2	3	1	2	2	3	5	5	2	1	1	1	1	2	2	5	2	4	4	5	3	2	5	1	2	3	1
2470	1	2	0	3	0	1	2	3	1	2	2	1	2	0	3	0	1	2	3	1	2	2	3	5	5	2	1	1	3	1	1	4	5	5	1	1	5	3	3	-8	1	2	3	1
2471	1	2	0	3	0	1	2	3	1	2	0	1	2	0	3	0	1	2	3	1	2	0	1	4	4	2	97	97	2	3	3	3	3	3	4	1	5	3	1	3	1	3	3	2
2472	1	2	0	3	0	1	2	3	1	2	0	1	2	0	3	0	1	2	3	1	2	0	2	4	4	2	1	1	1	1	1	2	4	4	2	2	4	5	5	5	4	1	3	3
2473	1	2	0	3	0	1	2	3	1	2	0	1	2	0	3	0	1	2	3	1	2	0	4	2	4	1	0	1	1	1	1	2	4	4	4	4	3	7	4	8	2	1	3	2
2474	1	2	0	3	0	1	2	3	1	2	0	1	2	0	3	0	1	2	3	1	2	0	2	3	2	2	1	1	1	1	1	4	5	5	3	2	1	1	1	2	1	1	3	3
2475	1	2	0	3	0	1	2	3	1	2	0	1	2	0	3	0	1	2	3	1	2	0	2	4	4	4	2	2	1	-8	-8	4	4	1	4	2	1	5	3	5	2	1	2	3
2476	1	2	0	3	0	1	2	3	2	2	0	1	2	0	3	0	1	2	3	2	2	0	2	4	4	1	97	97	4	1	2	3	2	2	2	2	4	4	2	5	3	1	3	1
2477	1	2	0	3	0	1	2	3	2	2	0	1	2	0	3	0	1	2	3	2	2	0	2	4	4	2	1	1	4	1	1	2	4	1	2	1	5	5	5	5	5	1	3	1
2478	1	2	0	3	0	1	2	3	2	2	0	1	2	0	3	0	1	2	3	2	2	0	4	2	4	2	1	1	1	1	1	2	5	5	4	1	1	6	3	6	1	1	3	2
2479	1	2	0	3	0	1	2	3	2	2	0	1	2	0	3	0	1	2	3	2	2	0	3	4	3	1	0	1	1	1	1	2	5	5	2	4	4	2	1	3	1	2	3	4
2480	1	2	0	3	0	1	2	3	2	2	0	1	2	0	3	0	1	2	3	2	2	0	5	2	3	1	1	0	1	4	1	2	5	5	1	2	5	5	1	7	5	1	1	2
2481	1	2	0	3	0	1	2	3	2	2	0	1	2	0	3	0	1	2	3	2	2	0	2	4	4	2	1	1	1	1	1	2	5	2	5	1	4	3	3	3	1	1	3	1
2482	1	2	0	3	0	1	2	3	2	2	0	1	2	0	3	0	1	2	3	2	2	0	2	4	4	2	1	1	1	1	1	2	4	5	4	3	5	5	5	7	7	1	3	2
2483	1	2	0	3	0	1	2	3	2	2	0	1	2	0	3	0	1	2	3	2	2	0	2	3	4	96	96	96	1	1	1	2	5	5	1	2	5	1	1	1	1	3	3	1
2484	1	2	0	3	0	1	2	3	2	2	0	1	2	0	3	0	1	2	3	2	2	0	4	2	4	2	97	97	3	2	1	4	3	4	2	3	4	5	5	4	2	2	2	2
2485	1	2	0	3	0	1	2	3	2	2	0	1	2	0	3	0	1	2	3	2	2	0	3	4	4	2	1	1	3	1	1	2	4	2	4	1	5	6	2	7	4	2	3	1
2486	1	2	0	3	0	1	2	3	2	2	0	1	2	0	3	0	1	2	3	2	2	0	4	4	2	2	1	1	1	1	1	2	5	2	3	1	5	1	1	2	1	2	3	2
2487	1	2	0	3	0	1	2	3	2	2	0	1	2	0	3	0	1	2	3	2	2	0	4	2	4	1	1	0	1	4	4	4	4	4	4	4	4	5	5	5	3	1	3	2
2488	1	2	0	3	0	1	2	3	2	2	0	1	2	0	3	0	1	2	3	2	2	0	2	4	4	2	1	1	1	1	1	2	5	5	5	5	5	-8	-8	-8	-8	1	3	3
2489	1	2	0	3	0	1	2	3	2	2	0	1	2	0	3	0	1	2	3	2	2	0	4	2	4	2	97	97	4	1	-8	4	4	2	5	1	5	5	1	1	5	2	3	5
2490	1	2	0	3	0	1	2	3	2	2	0	1	2	0	3	0	1	2	3	2	2	0	2	4	4	2	1	1	1	1	1	2	4	4	4	4	4	1	1	2	1	1	3	2
2491	1	2	0	3	0	1	2	3	2	2	0	1	2	0	3	0	1	2	3	2	2	0	5	4	2	1	1	0	4	1	1	4	5	2	4	2	4	1	5	1	1	1	3	3
2492	1	2	0	3	0	1	2	3	2	2	2	1	2	0	3	0	1	2	3	2	2	2	2	2	2	2	2	0	1	1	1	4	4	4	2	1	4	1	1	1	3	1	3	4
2493	1	2	0	3	0	1	2	3	2	2	2	1	2	0	3	0	1	2	3	2	2	2	2	4	4	2	97	97	1	2	1	2	4	4	4	4	4	5	4	7	3	1	3	2
2494	1	2	0	3	0	1	2	3	2	2	2	1	2	0	3	0	1	2	3	2	2	2	2	4	4	2	97	97	1	1	1	4	2	3	3	3	5	1	1	1	5	1	3	3
2495	1	2	0	3	0	1	2	3	2	2	2	1	2	0	3	0	1	2	3	2	2	2	4	4	4	2	97	97	2	2	2	2	4	4	4	4	4	5	4	6	5	2	3	4
2496	1	2	0	3	0	1	2	3	2	2	2	1	2	0	3	0	1	2	3	2	2	2	4	2	2	1	0	1	3	2	3	4	4	2	2	2	1	6	6	6	3	2	3	4
2497	1	2	0	3	0	1	2	3	2	2	2	1	2	0	3	0	1	2	3	2	2	2	2	3	1	1	97	97	4	1	1	3	2	1	1	1	5	1	1	4	1	1	3	1
2498	1	2	0	3	0	1	2	3	2	2	2	1	2	0	3	0	1	2	3	2	2	2	2	3	4	2	1	1	2	1	1	2	4	4	2	2	4	6	3	10	2	2	3	2
2499	1	2	0	3	0	1	2	3	2	2	2	1	2	0	3	0	1	2	3	2	2	2	4	2	3	2	1	1	4	4	4	1	4	4	4	4	4	1	1	3	4	2	3	2
2500	1	2	0	3	0	1	2	3	2	2	2	1	2	0	3	0	1	2	3	2	2	2	1	5	5	2	1	1	1	1	-8	-8	4	5	5	-8	5	5	-8	-8	-8	1	3	-8
2501	1	2	0	3	0	1	2	3	2	2	2	1	2	0	3	0	1	2	3	2	2	2	3	2	4	1	97	97	2	1	1	4	2	3	2	2	2	3	2	5	2	2	3	2
2502	1	2	0	3	0	1	2	3	2	2	2	1	2	0	3	0	1	2	3	2	2	2	4	1	4	1	1	0	1	1	1	2	2	4	5	1	1	1	8	1	5	2	3	4
2503	1	2	0	3	0	1	2	3	2	2	2	1	2	0	3	0	1	2	3	2	2	2	4	1	3	1	97	97	1	1	1	4	1	2	3	1	5	1	5	1	1	2	3	3
2504	1	2	0	3	0	1	2	3	2	2	2	1	2	0	3	0	1	2	3	2	2	2	2	5	5	2	1	1	1	1	1	2	5	1	3	1	4	1	1	1	1	2	2	2
2505	1	2	0	3	0	1	2	3	2	2	2	1	2	0	3	0	1	2	3	2	2	2	4	3	3	1	0	1	1	1	1	2	4	4	2	1	5	5	8	5	4	2	3	2
2506	1	2	0	3	0	1	2	3	2	2	2	1	2	0	3	0	1	2	3	2	2	2	1	4	4	1	1	0	4	4	5	1	1	1	1	1	5	6	4	7	4	2	3	4
2507	1	2	0	3	0	1	2	3	2	2	2	1	2	0	3	0	1	2	3	2	2	2	3	1	4	0	0	0	1	1	1	2	5	5	5	5	5	4	2	4	1	2	3	3
2508	1	2	0	3	0	1	2	3	2	2	2	1	2	0	3	0	1	2	3	2	2	2	4	4	3	1	1	0	1	1	1	4	4	3	3	2	4	3	3	6	3	1	3	3
2509	1	2	0	3	0	1	2	3	2	2	2	1	2	0	3	0	1	2	3	2	2	2	4	4	4	1	0	1	5	1	1	2	5	5	1	1	4	1	1	-8	1	1	3	5
2510	1	2	0	3	0	1	2	3	2	2	2	1	2	0	3	0	1	2	3	2	2	2	2	4	5	2	1	1	4	1	2	4	2	2	2	1	5	5	3	8	4	2	3	1
2511	1	2	0	3	0	1	2	3	2	2	2	1	2	0	3	0	1	2	3	2	2	2	4	4	4	1	1	0	1	1	1	2	4	3	4	2	3	5	5	5	5	1	3	2
2512	1	2	0	3	0	1	2	3	2	2	2	1	2	0	3	0	1	2	3	2	2	2	1	3	3	1	1	0	1	1	3	2	3	4	-8	2	5	1	1	-8	1	1	3	3
2513	1	2	0	3	0	1	2	3	2	2	2	1	2	0	3	0	1	2	3	2	2	2	3	3	4	5	3	2	1	1	1	4	5	5	5	3	2	6	1	7	1	1	3	3
2514	1	2	0	3	0	1	2	3	2	2	2	1	2	0	3	0	1	2	3	2	2	2	3	3	5	3	2	1	2	1	3	4	1	2	1	4	5	6	5	7	5	2	3	5
2515	1	2	0	3	0	1	2	3	2	2	2	1	2	0	3	0	1	2	3	2	2	2	4	2	5	2	1	1	3	1	4	4	2	2	2	1	4	5	4	6	5	2	3	4
2516	1	2	0	3	0	1	2	3	2	2	2	1	2	0	3	0	1	2	3	2	2	2	4	4	4	2	1	1	2	2	2	2	4	2	4	4	4	5	3	6	2	2	3	3
2517	1	2	0	3	0	1	2	3	2	2	2	1	2	0	3	0	1	2	3	2	2	2	4	4	5	2	1	1	2	1	1	2	4	2	2	2	4	5	5	6	2	1	3	3
2518	1	2	0	3	0	1	2	3	2	2	2	1	2	0	3	0	1	2	3	2	2	2	2	4	4	1	97	97	4	2	2	4	5	4	4	1	4	3	3	4	3	1	3	2
2519	1	2	0	3	0	1	2	3	2	2	2	1	2	0	3	0	1	2	3	2	2	2	2	5	5	2	1	1	1	1	-8	3	5	3	1	-8	1	5	6	-8	1	3	2	4
2520	1	2	0	3	0	1	2	3	2	2	2	1	2	0	3	0	1	2	3	2	2	2	2	3	3	2	1	1	3	1	1	2	4	4	4	3	3	4	3	6	3	1	3	3
2521	1	2	0	3	0	1	2	3	2	2	2	1	2	0	3	0	1	2	3	2	2	2	2	3	4	97	97	97	1	1	1	2	4	3	4	2	4	4	3	-8	2	1	3	2
2522	1	2	0	3	0	1	2	3	2	2	2	1	2	0	3	0	1	2	3	2	2	2	3	4	4	3	1	2	1	1	1	4	5	4	3	4	5	1	1	2	1	2	3	3
2523	1	2	0	3	0	1	2	3	2	2	2	1	2	0	3	0	1	2	3	2	2	2	3	4	2	97	97	97	3	3	3	4	3	2	3	2	3	6	5	4	5	2	3	4
2524	1	2	0	3	0	1	2	3	2	2	2	1	2	0	3	0	1	2	3	2	2	2	5	1	3	97	97	97	-8	-8	-8	3	3	3	3	3	3	4	3	-8	5	3	3	3
2525	1	2	0	3	0	1	2	3	2	2	2	1	2	0	3	0	1	2	3	2	2	2	4	3	5	2	2	0	2	1	3	2	2	1	2	1	3	7	6	8	5	2	3	4
2526	1	2	0	3	0	1	2	3	2	2	2	1	2	0	3	0	1	2	3	2	2	2	2	4	4	3	2	1	1	1	1	2	1	1	1	1	3	8	2	10	1	1	3	1
2527	1	2	0	3	0	1	2	3	2	2	2	1	2	0	3	0	1	2	3	2	2	2	4	4	4	2	1	1	1	1	1	4	4	4	4	4	4	1	1	1	1	1	3	4
2528	1	2	0	3	0	1	2	3	2	2	2	1	2	0	3	0	1	2	3	2	2	2	3	2	5	4	0	4	2	-8	-8	4	5	3	-8	-8	4	5	4	5	-8	1	3	1
2529	1	2	0	3	0	1	2	3	2	2	2	1	2	0	3	0	1	2	3	2	2	2	2	4	4	2	1	1	2	2	2	1	2	2	2	2	2	6	5	7	4	2	3	2
2530	1	2	0	3	0	1	2	3	2	2	2	1	2	0	3	0	1	2	3	2	2	2	4	4	4	1	0	1	2	1	1	4	4	2	4	1	4	4	4	5	3	1	2	3
2531	1	2	0	3	0	1	2	3	2	2	2	1	2	0	3	0	1	2	3	2	2	2	4	4	3	1	1	0	1	1	1	4	4	4	4	4	4	3	2	3	3	2	3	2
2532	1	2	0	3	0	1	2	3	2	2	2	1	2	0	3	0	1	2	3	2	2	2	2	5	5	2	1	1	2	1	1	1	5	5	5	2	3	5	4	6	2	2	3	2
2533	1	2	0	3	0	1	2	3	2	2	2	1	2	0	3	0	1	2	3	2	2	2	2	2	2	2	1	1	1	1	1	3	2	4	4	4	4	6	5	5	5	1	3	4
2534	1	2	0	3	0	1	2	3	2	2	2	1	2	0	3	0	1	2	3	2	2	2	4	4	5	2	97	97	1	1	1	4	5	2	5	5	5	5	4	6	4	1	3	2
2535	1	2	0	3	0	1	2	3	2	2	2	1	2	0	3	0	1	2	3	2	2	2	4	4	4	2	1	1	1	1	1	2	4	2	4	2	4	7	6	7	5	1	3	2
2536	1	2	0	3	0	1	2	3	2	2	2	1	2	0	3	0	1	2	3	2	2	2	2	1	5	1	1	0	1	1	1	2	5	5	5	2	5	5	1	7	1	1	3	2
2537	1	2	0	3	0	1	2	3	2	2	2	1	2	0	3	0	1	2	3	2	2	2	2	4	4	1	1	0	1	1	1	4	4	4	3	2	4	5	4	5	3	1	3	2
2538	1	2	0	3	0	1	2	3	2	2	2	1	2	0	3	0	1	2	3	2	2	2	4	5	5	1	97	97	3	1	1	2	5	4	1	1	4	5	1	4	7	3	3	3
2539	1	2	0	3	0	1	2	3	2	2	2	1	2	0	3	0	1	2	3	2	2	2	4	2	3	2	1	1	3	1	2	4	2	2	4	1	3	1	1	3	1	1	3	3
2540	1	2	0	3	0	1	2	3	2	2	2	1	2	0	3	0	1	2	3	2	2	2	2	3	4	0	0	0	4	1	1	1	2	2	2	2	3	3	3	3	3	2	3	3
2541	1	2	0	3	0	1	2	3	2	2	2	1	2	0	3	0	1	2	3	2	2	2	2	4	4	4	2	2	1	1	1	2	4	4	5	-8	2	6	5	5	3	2	3	2
2542	1	2	0	3	0	1	2	3	2	2	2	1	2	0	3	0	1	2	3	2	2	2	2	2	2	3	2	1	1	1	1	1	5	5	5	5	5	-8	-8	-8	-8	1	3	3
2543	1	2	0	3	0	1	2	3	2	2	2	1	2	0	3	0	1	2	3	2	2	2	2	5	5	5	3	2	3	2	2	1	5	2	2	2	4	10	5	10	1	1	3	2
2544	1	2	0	3	0	1	2	3	3	2	2	1	2	0	3	0	1	2	3	3	2	2	2	4	5	1	1	0	2	1	1	2	2	2	1	1	2	6	6	8	4	1	3	1
2545	1	2	0	3	0	1	2	3	3	2	2	1	2	0	3	0	1	2	3	3	2	2	4	4	4	2	1	1	2	2	2	4	4	4	2	5	5	4	1	4	2	1	2	4
2546	1	2	0	3	0	1	2	3	3	2	2	1	2	0	3	0	1	2	3	3	2	2	2	4	4	2	1	1	2	2	2	4	4	2	4	3	4	2	2	2	2	1	3	4
2547	1	2	0	3	0	1	2	3	3	2	2	1	2	0	3	0	1	2	3	3	2	2	4	4	4	2	1	1	1	1	1	2	5	5	4	2	5	8	5	-8	2	1	1	2
2548	1	2	0	3	0	1	2	3	3	2	2	1	2	0	3	0	1	2	3	3	2	2	5	2	4	3	1	2	3	1	1	2	4	2	2	2	5	3	2	-8	1	1	3	5
2549	1	2	0	3	0	1	2	3	3	2	2	1	2	0	3	0	1	2	3	3	2	2	3	-8	3	2	0	2	-8	1	-8	2	4	4	2	2	3	3	3	6	3	1	3	-8
2550	1	2	0	3	0	1	2	3	3	2	2	1	2	0	3	0	1	2	3	3	2	2	5	4	5	97	97	97	1	1	1	3	5	1	1	1	1	5	5	5	2	3	3	3
2551	1	2	0	3	0	1	2	3	3	2	2	1	2	0	3	0	1	2	3	3	2	2	4	1	4	2	1	1	4	3	1	2	4	4	2	2	4	3	2	5	2	1	3	2
2552	1	2	0	3	0	1	2	3	3	2	2	1	2	0	3	0	1	2	3	3	2	2	2	3	5	2	1	1	2	1	1	2	4	4	2	2	4	5	3	7	5	2	3	2
2553	1	2	0	3	0	1	2	3	3	2	2	1	2	0	3	0	1	2	3	3	2	2	4	4	4	2	97	97	1	1	1	-8	3	-8	-8	-8	-8	5	-8	-8	5	-8	-8	-8
2554	1	2	0	3	0	1	2	3	3	2	2	1	2	0	3	0	1	2	3	3	2	2	3	4	3	2	1	1	2	2	1	2	4	4	4	3	3	4	4	5	3	2	3	3
2555	1	2	0	3	0	1	2	3	3	2	2	1	2	0	3	0	1	2	3	3	2	2	5	3	4	-2	-2	-2	1	1	1	4	3	4	5	1	3	4	3	4	3	2	3	3
2556	1	2	0	3	0	1	2	3	3	2	2	1	2	0	3	0	1	2	3	3	2	2	1	4	4	2	1	1	1	1	1	2	5	5	5	1	5	7	9	6	10	1	3	4
[truncated: 3,602 more rows]

## Sheet: female
id	gender	age	marital_status	educational_level	chronic_diseases	area_of_residence	average_monthly_income	self_perceived_health_status	smoking	alcohol_drinking	betel_nuts_chewing	VAR00001	VAR00002	VAR00003	VAR00004	VAR00005	VAR00006	VAR00007	VAR00008	VAR00009	VAR00010	VAR00011	VAR00012	VAR00013	VAR00014	VAR00015	VAR00016	VAR00017	VAR00018	VAR00019	VAR00020	VAR00021	VAR00022	VAR00023	VAR00024	VAR00025	VAR00026	VAR00027	VAR00028	VAR00029	VAR00030	VAR00031	VAR00032	VAR00033
9	2	1	1	1	1	4	0	5	3	2	3	2	1	1	1	1	4	0	5	3	2	3	2	4	4	2	1	1	1	1	3	2	5	4	1	2	5	5	5	8	3	2	3	2
10	2	1	1	1	1	4	0	5	3	2	3	2	1	1	1	1	4	0	5	3	2	3	4	4	4	2	1	1	2	1	1	4	4	4	5	2	4	4	7	3	3	1	1	2
11	2	1	1	1	1	4	0	5	3	2	3	2	1	1	1	1	4	0	5	3	2	3	1	4	4	2	1	1	1	1	1	2	4	4	2	4	4	4	2	7	1	2	3	4
12	2	1	1	1	1	4	0	5	3	2	3	2	1	1	1	1	4	0	5	3	2	3	4	3	4	2	1	1	1	1	1	4	1	2	2	1	2	4	4	4	1	2	2	1
13	2	1	1	1	1	4	0	5	3	2	3	2	1	1	1	1	4	0	5	3	2	3	3	1	5	2	2	0	3	1	1	2	4	1	1	4	1	4	3	4	1	1	1	2
14	2	1	1	1	1	4	0	5	3	2	3	2	1	1	1	1	4	0	5	3	2	3	4	4	5	2	1	1	1	1	2	4	4	4	4	2	3	5	5	4	3	2	3	3
15	2	1	1	1	1	4	0	5	3	2	3	2	1	1	1	1	4	0	5	3	2	3	1	4	5	2	1	1	1	1	1	2	1	1	4	1	5	5	3	5	3	2	2	-8
16	2	1	1	1	1	4	0	5	3	2	3	2	1	1	1	1	4	0	5	3	2	3	2	4	5	2	1	1	4	1	1	2	2	4	1	4	3	5	1	6	4	2	3	1
17	2	1	1	1	1	4	0	5	3	2	3	2	1	1	1	1	4	0	5	3	2	3	5	2	4	1	0	1	3	3	3	3	2	3	3	2	4	7	1	7	2	3	3	5
29	2	1	1	1	1	4	0	5	3	2	3	2	1	1	1	1	4	0	5	3	2	3	4	4	4	1	97	97	2	1	1	4	5	1	4	2	4	3	3	4	5	1	3	2
30	2	1	1	1	1	4	0	5	3	2	3	2	1	1	1	1	4	0	5	3	2	3	4	3	3	1	97	97	2	2	2	4	3	3	2	3	3	5	5	5	5	1	3	2
31	2	1	1	1	1	4	0	5	3	2	3	2	1	1	1	1	4	0	5	3	2	3	4	3	4	1	0	1	3	1	1	4	2	1	2	5	5	4	4	5	5	-8	1	3
32	2	1	1	1	1	4	0	5	3	2	3	2	1	1	1	1	4	0	5	3	2	3	4	3	4	2	1	1	4	1	1	4	4	4	5	1	1	3	4	2	4	1	2	4
33	2	1	1	1	1	4	0	5	3	2	3	2	1	1	1	1	4	0	5	3	2	3	4	4	4	1	0	1	1	1	1	4	1	1	1	1	5	3	2	4	1	1	1	1
34	2	1	1	1	1	4	0	5	3	2	3	2	1	1	1	1	4	0	5	3	2	3	2	2	2	2	0	2	2	2	2	4	4	4	4	1	4	4	3	6	1	1	2	2
35	2	1	1	1	1	4	0	5	3	2	3	2	1	1	1	1	4	0	5	3	2	3	4	3	4	2	1	1	4	2	3	4	4	5	2	2	3	5	3	6	3	2	3	2
36	2	1	1	1	1	4	0	5	3	2	3	2	1	1	1	1	4	0	5	3	2	3	1	4	2	2	1	1	4	1	1	2	4	4	4	1	-8	2	1	4	2	1	3	4
37	2	1	1	1	1	4	0	5	3	2	3	2	1	1	1	1	4	0	5	3	2	3	2	2	4	2	1	1	2	1	3	3	4	1	4	1	5	5	5	7	5	1	1	5
38	2	1	1	1	1	4	0	5	3	2	3	2	1	1	1	1	4	0	5	3	2	3	4	4	5	2	0	2	4	1	1	2	2	2	4	2	5	5	5	5	5	1	2	2
39	2	1	1	1	1	4	0	5	3	2	3	2	1	1	1	1	4	0	5	3	2	3	2	4	5	1	97	97	1	1	1	2	2	2	5	2	5	6	4	7	5	1	2	2
40	2	1	1	1	1	4	0	5	3	2	3	2	1	1	1	1	4	0	5	3	2	3	3	3	5	1	0	1	3	4	2	2	5	5	5	1	4	3	3	4	3	2	3	5
41	2	1	1	1	1	4	0	5	3	2	3	2	1	1	1	1	4	0	5	3	2	3	4	4	4	2	0	2	1	1	1	4	2	4	1	1	5	4	4	4	7	1	2	2
47	2	4	1	3	1	1	3	3	0	1	3	2	4	1	3	1	1	3	3	0	1	3	1	3	4	2	1	1	1	-8	1	2	4	4	4	2	4	4	2	6	5	3	3	4
48	2	4	1	3	1	1	3	3	0	1	3	2	4	1	3	1	1	3	3	0	1	3	2	2	4	2	1	1	4	2	1	2	1	4	2	1	2	2	2	3	2	3	3	2
49	2	4	1	3	1	1	3	3	0	1	3	2	4	1	3	1	1	3	3	0	1	3	2	3	4	2	1	1	1	1	1	2	4	4	4	2	4	5	7	5	9	1	1	2
50	2	4	1	3	1	1	3	3	0	1	3	2	4	1	3	1	1	3	3	0	1	3	4	4	4	8	3	5	1	1	1	2	5	5	5	-8	1	5	3	-8	1	1	3	1
51	2	4	1	3	1	1	6	3	0	1	3	2	4	1	3	1	1	6	3	0	1	3	4	2	4	2	1	1	1	1	1	1	1	2	2	2	4	4	3	5	1	1	2	1
57	2	4	1	3	1	1	3	3	0	1	3	2	4	1	3	1	1	3	3	0	1	3	4	2	3	2	1	1	3	1	3	4	4	3	4	1	5	2	2	2	2	2	3	4
58	2	4	1	3	1	1	3	3	0	1	3	2	4	1	3	1	1	3	3	0	1	3	1	1	4	1	0	1	1	1	1	2	2	4	4	1	5	1	1	1	1	1	2	1
59	2	4	1	3	1	1	3	3	0	1	3	2	4	1	3	1	1	3	3	0	1	3	2	3	4	1	97	97	3	1	3	4	3	2	4	2	4	5	5	5	5	2	1	3
60	2	4	1	3	1	1	3	3	0	1	3	2	4	1	3	1	1	3	3	0	1	3	2	3	3	1	97	97	1	2	1	4	2	2	4	3	4	4	3	6	4	2	1	2
61	2	4	1	3	1	1	3	3	0	1	3	2	4	1	3	1	1	3	3	0	1	3	3	2	4	2	1	1	2	1	2	2	4	3	2	1	4	4	5	6	3	2	3	2
67	2	4	1	3	1	1	3	3	0	1	3	2	4	1	3	1	1	3	3	0	1	3	2	2	4	2	1	1	2	1	1	4	5	5	4	2	2	1	1	1	1	1	2	2
68	2	4	1	3	1	1	3	3	0	1	3	2	4	1	3	1	1	3	3	0	1	3	3	4	4	2	1	1	3	3	3	2	4	2	3	2	3	6	6	6	5	2	3	4
69	2	4	1	3	1	1	3	3	0	1	3	2	4	1	3	1	1	3	3	0	1	3	4	3	4	2	1	1	3	1	3	4	2	2	2	1	4	6	4	7	5	2	3	2
70	2	4	1	3	1	1	3	3	0	1	3	2	4	1	3	1	1	3	3	0	1	3	4	4	4	2	1	1	4	1	3	2	4	1	1	1	1	3	2	5	1	1	3	1
71	2	4	1	3	1	1	3	3	0	1	3	2	4	1	3	1	1	3	3	0	1	3	4	4	4	2	1	1	1	1	3	2	2	3	2	2	4	5	5	5	4	2	3	2
77	2	4	1	3	1	1	3	3	0	1	3	2	4	1	3	1	1	3	3	0	1	3	4	3	4	2	1	1	2	3	2	3	2	2	4	2	3	5	4	5	6	2	1	3
78	2	4	1	3	1	1	3	3	0	1	3	2	4	1	3	1	1	3	3	0	1	3	2	3	4	3	1	2	1	1	1	-8	3	3	4	3	4	5	3	5	2	2	3	5
79	2	4	1	3	1	1	3	3	0	1	3	2	4	1	3	1	1	3	3	0	1	3	2	4	5	2	97	97	4	1	4	4	3	2	4	1	2	3	3	5	6	2	3	4
80	2	4	1	3	1	1	3	3	0	1	3	2	4	1	3	1	1	3	3	0	1	3	4	2	2	2	1	1	1	1	1	2	4	4	4	2	2	1	1	5	1	2	3	2
81	2	4	1	3	1	1	3	3	0	1	3	2	4	1	3	1	1	3	3	0	1	3	3	3	4	2	1	1	1	1	1	4	2	2	2	-8	4	3	2	6	1	1	3	5
82	2	4	1	3	1	1	3	3	0	1	3	2	4	1	3	1	1	3	3	0	1	3	4	4	5	2	97	97	4	1	1	2	2	3	3	-8	2	4	5	4	2	2	3	3
89	2	4	1	3	1	1	3	3	0	1	3	2	4	1	3	1	1	3	3	0	1	3	2	4	5	2	1	1	5	2	3	4	4	4	3	2	4	6	1	10	4	2	3	2
90	2	4	1	3	1	1	3	3	0	1	3	2	4	1	3	1	1	3	3	0	1	3	4	3	5	1	1	0	3	1	3	4	4	4	4	1	4	5	3	8	3	2	1	3
91	2	4	1	3	1	1	3	3	0	1	3	2	4	1	3	1	1	3	3	0	1	3	3	4	5	2	1	1	5	3	5	1	2	2	2	1	5	1	1	1	1	2	2	5
92	2	4	1	3	1	1	3	3	0	1	3	2	4	1	3	1	1	3	3	0	1	3	4	4	3	2	1	1	3	1	1	2	2	2	3	2	3	3	3	6	3	2	3	2
96	2	4	1	3	1	1	3	3	0	1	3	2	4	1	3	1	1	3	3	0	1	3	3	4	4	2	0	2	1	1	1	4	2	2	3	4	4	5	5	3	3	2	2	2
97	2	4	1	3	1	1	3	3	0	1	3	2	4	1	3	1	1	3	3	0	1	3	4	4	5	2	1	1	3	1	1	4	4	2	2	1	4	6	5	5	5	3	1	2
98	2	4	1	3	1	1	3	3	0	1	3	2	4	1	3	1	1	3	3	0	1	3	4	4	3	0	0	0	1	1	1	2	2	2	3	2	2	3	7	2	2	3	1	4
99	2	4	1	3	1	1	3	3	0	1	3	2	4	1	3	1	1	3	3	0	1	3	4	3	4	2	1	1	3	1	1	1	2	1	1	1	4	3	3	3	8	2	2	4
523	2	4	1	3	1	1	0	3	0	1	3	2	4	1	3	1	1	0	3	0	1	3	3	4	4	2	1	1	3	1	3	2	4	4	2	1	4	5	4	6	5	2	3	2
524	2	4	1	3	1	1	0	3	0	1	3	2	4	1	3	1	1	0	3	0	1	3	4	1	5	1	97	97	3	1	1	3	1	4	1	1	4	5	3	6	2	1	1	4
525	2	4	1	3	1	1	0	3	0	1	3	2	4	1	3	1	1	0	3	0	1	3	2	4	4	2	97	97	5	4	5	1	5	5	5	2	1	7	7	9	8	2	3	5
526	2	4	1	3	1	1	0	3	0	1	3	2	4	1	3	1	1	0	3	0	1	3	3	3	4	2	1	1	3	1	3	4	1	1	4	1	5	3	5	7	7	2	3	4
527	2	4	1	3	1	1	0	3	0	1	3	2	4	1	3	1	1	0	3	0	1	3	2	4	5	2	1	1	3	1	1	2	4	3	4	1	4	4	1	8	4	2	3	3
528	2	4	1	3	1	1	0	3	0	1	3	2	4	1	3	1	1	0	3	0	1	3	3	4	4	2	1	1	3	3	3	3	4	3	4	4	4	5	5	7	7	2	3	2
529	2	4	1	3	1	1	0	3	0	1	3	2	4	1	3	1	1	0	3	0	1	3	4	2	2	1	97	97	3	2	1	2	4	4	3	3	3	3	3	6	2	2	3	4
530	2	4	1	3	1	1	0	3	0	1	3	2	4	1	3	1	1	0	3	0	1	3	3	4	5	2	97	97	1	1	1	1	2	1	1	1	5	6	2	6	1	2	2	3
531	2	4	1	3	1	1	0	3	0	1	3	2	4	1	3	1	1	0	3	0	1	3	4	4	4	2	1	1	5	3	3	3	4	1	4	3	3	5	3	5	4	1	3	3
532	2	4	1	3	1	1	0	3	0	1	3	2	4	1	3	1	1	0	3	0	1	3	2	2	4	2	1	1	3	1	3	4	5	5	3	2	5	7	7	9	10	2	3	4
533	2	4	1	3	1	1	0	3	0	1	3	2	4	1	3	1	1	0	3	0	1	3	2	4	5	2	97	97	1	1	1	4	5	2	2	2	5	5	5	-8	5	2	3	4
534	2	4	1	3	1	1	0	3	0	1	3	2	4	1	3	1	1	0	3	0	1	3	4	4	5	2	1	1	4	1	2	2	4	4	4	4	4	8	8	8	8	2	2	2
535	2	4	1	3	1	1	0	3	0	1	3	2	4	1	3	1	1	0	3	0	1	3	4	4	3	2	1	1	1	1	1	4	4	3	2	3	2	5	5	5	3	2	2	2
536	2	4	1	3	1	1	0	3	0	1	3	2	4	1	3	1	1	0	3	0	1	3	5	2	4	2	1	1	1	1	1	1	2	1	5	1	5	5	10	1	5	1	1	1
537	2	4	1	3	1	1	0	3	0	1	3	2	4	1	3	1	1	0	3	0	1	3	2	3	4	2	1	1	3	1	3	4	2	2	1	1	5	4	5	3	4	2	1	2
538	2	4	1	3	1	1	0	3	0	1	3	2	4	1	3	1	1	0	3	0	1	3	4	4	3	2	1	1	2	1	1	4	2	4	4	2	4	4	3	-8	3	2	3	2
539	2	4	1	3	1	1	0	3	0	1	3	2	4	1	3	1	1	0	3	0	1	3	2	4	3	1	97	97	3	1	1	2	5	1	1	1	5	3	6	6	4	2	3	2
540	2	4	1	3	1	1	0	3	0	1	3	2	4	1	3	1	1	0	3	0	1	3	4	3	4	2	1	1	2	4	2	4	4	4	4	4	4	4	3	6	3	1	2	3
541	2	4	1	3	1	1	0	3	0	1	3	2	4	1	3	1	1	0	3	0	1	3	4	4	5	2	1	1	-8	1	1	4	1	1	1	1	4	5	2	8	1	1	1	4
542	2	4	1	3	1	1	0	3	0	1	3	2	4	1	3	1	1	0	3	0	1	3	2	3	5	1	0	1	3	1	3	2	4	3	4	2	5	7	4	7	3	2	3	2
543	2	4	1	3	1	1	0	3	0	1	3	2	4	1	3	1	1	0	3	0	1	3	4	3	4	1	97	97	2	1	3	4	2	3	4	2	4	4	5	3	5	1	2	3
544	2	4	1	3	1	1	0	3	0	1	3	2	4	1	3	1	1	0	3	0	1	3	2	2	4	2	1	1	2	1	1	2	4	4	4	4	3	6	6	5	4	1	2	1
545	2	4	1	3	1	1	0	3	0	1	3	2	4	1	3	1	1	0	3	0	1	3	2	3	4	2	1	1	4	1	2	1	2	3	4	1	4	7	5	7	5	2	3	4
546	2	4	1	3	1	1	0	3	0	1	3	2	4	1	3	1	1	0	3	0	1	3	1	1	4	1	0	1	1	1	1	4	2	3	2	2	3	5	5	7	1	1	1	5
547	2	4	1	3	1	1	0	3	0	1	3	2	4	1	3	1	1	0	3	0	1	3	4	2	4	3	2	1	4	1	2	4	4	4	4	2	2	6	2	8	4	2	3	2
548	2	4	1	3	1	1	0	3	0	1	3	2	4	1	3	1	1	0	3	0	1	3	5	3	4	2	0	2	1	1	1	4	3	4	3	2	5	3	3	3	2	2	2	2
549	2	4	1	3	1	1	0	3	0	1	3	2	4	1	3	1	1	0	3	0	1	3	2	4	5	1	0	1	3	1	3	4	4	3	3	2	3	4	4	4	5	2	3	5
550	2	4	1	3	1	1	0	3	0	1	3	2	4	1	3	1	1	0	3	0	1	3	4	3	4	2	97	97	2	2	2	4	4	2	4	2	3	4	3	5	3	2	2	2
551	2	4	1	3	1	1	0	3	0	1	3	2	4	1	3	1	1	0	3	0	1	3	3	4	4	1	1	0	1	1	1	4	3	3	2	2	4	2	2	4	2	1	3	2
552	2	4	1	3	1	1	4	3	0	1	3	2	4	1	3	1	1	4	3	0	1	3	3	3	4	2	0	2	1	1	1	1	3	3	2	3	4	4	3	4	4	2	1	2
553	2	4	1	3	1	1	4	3	0	1	3	2	4	1	3	1	1	4	3	0	1	3	4	4	5	1	0	1	1	1	1	4	5	4	4	2	4	5	3	5	3	1	2	1
554	2	4	1	3	1	1	4	3	0	1	3	2	4	1	3	1	1	4	3	0	1	3	2	4	4	2	1	1	1	1	1	3	3	3	3	2	4	7	7	7	5	2	2	2
555	2	4	1	3	1	1	4	3	0	1	3	2	4	1	3	1	1	4	3	0	1	3	3	3	4	1	97	97	3	2	3	4	2	2	2	2	4	4	4	5	4	2	1	4
556	2	4	1	3	1	1	4	3	0	1	3	2	4	1	3	1	1	4	3	0	1	3	2	2	5	2	1	1	4	3	2	2	3	3	4	2	4	5	5	7	9	2	3	3
557	2	4	1	3	1	1	4	3	0	1	3	2	4	1	3	1	1	4	3	0	1	3	3	4	5	2	1	1	1	1	1	4	2	2	2	1	4	4	3	5	2	2	1	2
558	2	4	1	3	1	1	4	3	0	1	3	2	4	1	3	1	1	4	3	0	1	3	4	2	4	2	1	1	4	2	1	4	3	4	2	2	3	3	3	2	2	2	3	2
559	2	4	1	3	1	1	4	3	0	1	3	2	4	1	3	1	1	4	3	0	1	3	2	4	4	2	1	1	1	1	1	4	4	4	3	3	4	6	5	7	4	2	2	3
560	2	4	1	3	1	1	4	3	0	1	3	2	4	1	3	1	1	4	3	0	1	3	4	3	4	2	1	1	1	1	1	2	2	4	2	2	4	4	2	4	4	2	2	4
561	2	4	1	3	1	1	4	3	0	1	3	2	4	1	3	1	1	4	3	0	1	3	2	4	4	2	1	1	1	1	1	4	4	4	3	3	4	7	6	8	5	2	3	3
562	2	4	1	3	1	1	4	3	0	1	3	2	4	1	3	1	1	4	3	0	1	3	4	2	2	0	0	0	3	2	4	4	2	4	4	2	5	4	2	5	2	2	3	4
563	2	4	1	3	1	1	4	3	0	1	3	2	4	1	3	1	1	4	3	0	1	3	3	4	4	1	0	1	2	1	1	4	4	2	3	2	4	8	7	2	5	2	3	3
564	2	4	1	3	1	1	4	3	0	1	3	2	4	1	3	1	1	4	3	0	1	3	2	2	4	-2	-2	-2	4	2	3	2	4	4	4	2	4	7	5	8	6	2	1	2
565	2	4	1	3	1	1	4	3	0	1	3	2	4	1	3	1	1	4	3	0	1	3	4	4	5	2	1	1	1	1	1	1	5	5	2	4	5	1	1	1	2	2	3	4
566	2	4	1	3	1	1	4	3	0	1	3	2	4	1	3	1	1	4	3	0	1	3	4	2	4	1	1	0	1	1	1	4	2	2	3	2	4	6	6	7	5	-8	2	4
567	2	4	1	3	1	1	4	3	0	1	3	2	4	1	3	1	1	4	3	0	1	3	2	4	5	4	2	2	1	1	1	2	4	4	4	4	4	5	5	5	4	2	2	2
568	2	4	1	3	1	1	4	3	0	1	3	2	4	1	3	1	1	4	3	0	1	3	2	4	4	4	2	2	1	1	1	4	4	4	3	4	4	5	4	6	3	2	2	3
569	2	4	1	3	1	1	4	3	0	1	3	2	4	1	3	1	1	4	3	0	1	3	4	2	4	1	1	0	1	1	1	4	4	2	4	2	4	5	1	5	1	1	3	4
570	2	4	1	3	1	1	4	3	0	1	3	2	4	1	3	1	1	4	3	0	1	3	2	4	5	2	1	1	1	1	1	4	4	4	4	2	3	5	6	5	4	2	2	2
571	2	4	1	3	1	1	4	3	0	1	3	2	4	1	3	1	1	4	3	0	1	3	2	2	4	2	1	1	1	1	1	4	4	4	4	2	2	4	3	4	3	1	2	3
572	2	4	1	3	1	1	4	3	0	1	3	2	4	1	3	1	1	4	3	0	1	3	2	2	2	2	1	1	1	1	1	4	2	2	4	2	4	2	3	2	1	2	2	3
573	2	4	1	3	1	1	4	3	0	1	3	2	4	1	3	1	1	4	3	0	1	3	2	3	3	2	1	1	1	1	1	4	2	2	2	2	4	1	1	1	1	2	2	1
574	2	4	1	3	1	1	4	3	0	1	3	2	4	1	3	1	1	4	3	0	1	3	5	3	4	2	1	1	3	1	1	4	2	4	2	1	5	4	4	4	3	2	3	4
575	2	4	1	3	1	1	4	3	0	1	3	2	4	1	3	1	1	4	3	0	1	3	1	1	5	5	2	3	1	1	1	2	1	5	5	1	3	4	4	4	4	1	3	5
576	2	4	1	3	1	1	4	3	0	1	3	2	4	1	3	1	1	4	3	0	1	3	2	4	4	5	2	3	1	1	1	2	4	4	4	2	2	5	5	5	2	2	2	4
577	2	4	1	3	1	1	4	3	0	1	3	2	4	1	3	1	1	4	3	0	1	3	2	4	5	2	1	1	2	1	1	4	2	3	2	2	4	6	5	7	5	2	-8	2
578	2	4	1	3	1	1	4	3	0	1	3	2	4	1	3	1	1	4	3	0	1	3	2	3	4	1	1	0	1	1	1	3	4	2	2	2	4	5	5	5	2	1	3	4
579	2	4	1	3	1	1	4	3	0	1	3	2	4	1	3	1	1	4	3	0	1	3	3	4	3	1	97	97	3	2	3	-8	4	2	4	2	3	6	4	7	4	2	1	4
580	2	4	1	3	1	1	4	3	0	1	3	2	4	1	3	1	1	4	3	0	1	3	2	2	4	8	4	4	1	1	1	4	1	1	1	1	5	9	5	9	7	2	1	5
581	2	4	1	3	1	1	4	3	0	1	3	2	4	1	3	1	1	4	3	0	1	3	3	4	4	1	1	0	1	1	1	4	4	2	2	2	4	2	2	2	3	2	2	2
582	2	4	1	3	1	1	5	3	0	1	3	2	4	1	3	1	1	5	3	0	1	3	2	4	4	3	1	2	2	2	2	4	4	4	4	2	2	5	7	5	4	1	2	2
583	2	4	1	3	1	1	5	3	0	1	3	2	4	1	3	1	1	5	3	0	1	3	3	4	4	1	1	0	1	1	1	4	4	3	4	1	5	2	3	3	5	2	3	4
584	2	4	1	3	1	1	5	3	0	1	3	2	4	1	3	1	1	5	3	0	1	3	4	2	4	1	1	0	1	1	1	1	2	2	2	2	5	6	6	3	2	1	2	4
585	2	4	1	3	1	1	5	3	0	1	3	2	4	1	3	1	1	5	3	0	1	3	3	4	4	2	1	1	3	1	3	4	3	3	2	4	3	1	1	1	1	2	3	4
586	2	4	1	3	1	1	5	3	0	1	3	2	4	1	3	1	1	5	3	0	1	3	2	4	4	3	97	97	1	1	1	1	4	4	3	2	4	4	3	4	2	1	3	3
587	2	4	1	3	1	1	5	3	0	1	3	2	4	1	3	1	1	5	3	0	1	3	4	2	3	2	1	1	1	1	1	4	2	2	4	2	5	3	6	1	1	2	2	1
588	2	4	1	3	1	1	5	3	0	1	3	2	4	1	3	1	1	5	3	0	1	3	4	3	4	1	1	0	1	1	1	2	2	4	2	2	4	3	3	3	2	2	3	3
589	2	4	1	3	1	1	5	3	0	1	3	2	4	1	3	1	1	5	3	0	1	3	4	2	4	2	1	1	2	1	1	4	4	4	3	3	4	3	3	5	3	2	3	3
590	2	4	1	3	1	1	5	3	0	1	3	2	4	1	3	1	1	5	3	0	1	3	4	3	4	1	1	0	3	1	3	4	4	4	5	4	4	3	1	1	2	1	2	1
591	2	4	1	3	1	1	3	3	0	1	3	2	4	1	3	1	1	3	3	0	1	3	3	2	3	1	0	1	1	1	1	4	4	5	4	2	4	2	2	2	2	1	2	4
634	2	4	1	3	1	1	0	2	0	1	3	2	4	1	3	1	1	0	2	0	1	3	4	2	2	1	0	1	4	3	4	4	2	2	4	4	4	5	7	5	5	2	3	3
635	2	4	1	3	1	1	0	2	0	1	3	2	4	1	3	1	1	0	2	0	1	3	2	4	4	0	0	0	4	1	3	2	2	2	3	-8	4	7	1	7	2	2	3	4
636	2	4	1	3	1	1	0	2	0	1	3	2	4	1	3	1	1	0	2	0	1	3	3	4	5	2	1	1	2	1	1	3	4	2	3	2	3	4	4	5	3	2	3	4
637	2	4	1	3	1	1	0	2	0	1	3	2	4	1	3	1	1	0	2	0	1	3	3	4	5	1	0	0	1	1	1	4	2	2	2	2	2	6	4	7	3	1	2	2
638	2	4	1	3	1	1	0	2	0	1	3	2	4	1	3	1	1	0	2	0	1	3	2	4	4	3	2	1	1	1	1	4	3	2	2	2	2	4	5	4	5	2	2	2
639	2	4	1	3	1	1	0	2	0	1	3	2	4	1	3	1	1	0	2	0	1	3	4	2	2	2	1	1	1	1	1	4	4	4	2	3	2	2	3	2	3	1	3	4
640	2	4	1	3	1	1	0	2	0	1	3	2	4	1	3	1	1	0	2	0	1	3	2	4	4	2	1	1	3	1	1	2	2	2	2	2	4	6	5	8	5	2	3	2
641	2	4	1	3	1	1	0	2	0	1	3	2	4	1	3	1	1	0	2	0	1	3	2	4	4	2	1	1	5	3	5	4	1	1	1	1	4	3	3	7	3	2	3	4
642	2	4	1	3	1	1	0	2	0	1	3	2	4	1	3	1	1	0	2	0	1	3	3	2	2	2	1	1	1	1	1	1	3	3	2	2	4	2	2	2	2	1	3	4
643	2	4	1	3	1	1	0	2	0	1	3	2	4	1	3	1	1	0	2	0	1	3	3	3	3	1	0	1	1	1	1	4	4	3	3	2	3	5	4	5	4	2	3	2
644	2	4	1	3	1	1	0	2	0	1	3	2	4	1	3	1	1	0	2	0	1	3	2	4	4	2	1	1	2	2	2	3	4	4	2	2	3	5	6	5	4	2	2	2
645	2	4	1	3	1	1	0	2	0	1	3	2	4	1	3	1	1	0	2	0	1	3	4	2	4	2	1	1	1	1	1	1	4	4	1	1	5	1	1	1	2	2	3	1
646	2	4	1	3	1	1	0	2	0	1	3	2	4	1	3	1	1	0	2	0	1	3	2	4	4	2	1	1	1	1	1	2	4	2	2	2	4	6	5	6	4	2	2	2
647	2	4	1	3	1	1	0	2	0	1	3	2	4	1	3	1	1	0	2	0	1	3	3	4	4	2	1	1	3	1	1	3	4	2	4	3	4	1	1	4	1	2	3	3
648	2	4	1	3	1	1	0	2	0	1	3	2	4	1	3	1	1	0	2	0	1	3	4	3	4	2	1	1	2	1	1	4	4	3	2	2	3	3	2	3	2	2	3	3
649	2	4	1	3	1	1	0	2	0	1	3	2	4	1	3	1	1	0	2	0	1	3	4	4	4	1	1	0	2	1	2	4	4	4	2	2	4	4	1	5	4	2	2	2
650	2	4	1	3	1	1	0	2	0	1	3	2	4	1	3	1	1	0	2	0	1	3	5	4	4	2	0	2	1	1	1	2	3	2	2	1	5	9	9	-8	6	2	2	1
651	2	4	1	3	1	1	0	2	0	1	3	2	4	1	3	1	1	0	2	0	1	3	3	2	4	2	1	1	1	1	1	4	3	2	3	2	4	5	4	6	3	2	1	3
652	2	4	1	3	1	1	0	2	0	1	3	2	4	1	3	1	1	0	2	0	1	3	2	4	4	2	1	1	2	1	2	4	4	4	3	2	4	5	4	6	3	2	3	3
653	2	4	1	3	1	1	0	2	0	1	3	2	4	1	3	1	1	0	2	0	1	3	4	4	4	0	0	0	1	1	1	2	1	1	3	2	5	4	2	8	4	-8	-8	3
654	2	4	1	3	1	1	0	2	0	1	3	2	4	1	3	1	1	0	2	0	1	3	2	4	4	2	1	1	2	2	2	3	4	4	3	1	4	7	7	8	7	2	1	3
655	2	4	1	3	1	1	0	2	0	1	3	2	4	1	3	1	1	0	2	0	1	3	3	2	2	2	1	1	1	1	1	1	4	2	4	2	4	1	1	1	1	2	3	3
656	2	4	1	3	1	1	0	2	0	1	3	2	4	1	3	1	1	0	2	0	1	3	3	3	4	2	1	1	1	1	1	4	4	4	3	2	4	3	2	4	3	2	2	3
657	2	4	1	3	1	1	0	2	0	1	3	2	4	1	3	1	1	0	2	0	1	3	3	4	4	2	1	1	3	1	2	2	4	4	2	3	3	5	5	-8	4	1	1	4
658	2	4	1	3	1	1	0	2	0	1	3	2	4	1	3	1	1	0	2	0	1	3	4	4	4	2	1	1	2	1	1	2	4	3	4	2	4	3	3	5	4	1	3	4
659	2	4	1	3	1	1	0	2	0	1	3	2	4	1	3	1	1	0	2	0	1	3	3	3	4	2	1	1	4	1	3	4	2	2	3	2	2	5	4	6	3	2	1	2
660	2	4	1	3	1	1	0	2	0	1	3	2	4	1	3	1	1	0	2	0	1	3	2	2	5	1	0	1	1	1	1	4	1	1	1	1	5	8	9	8	5	2	2	1
661	2	4	1	3	1	1	0	2	0	1	3	2	4	1	3	1	1	0	2	0	1	3	2	4	4	2	1	1	1	1	1	1	1	2	5	1	3	5	5	4	4	2	2	2
662	2	4	1	3	1	1	0	2	0	1	3	2	4	1	3	1	1	0	2	0	1	3	2	4	4	2	1	1	1	1	1	4	4	2	2	2	4	4	2	5	2	1	3	2
663	2	4	1	3	1	1	0	2	0	1	3	2	4	1	3	1	1	0	2	0	1	3	4	2	4	2	1	1	2	1	3	4	4	4	2	3	2	5	4	6	4	1	1	4
664	2	4	1	3	1	1	0	2	0	1	3	2	4	1	3	1	1	0	2	0	1	3	4	2	3	2	1	1	1	1	1	4	3	4	2	2	3	4	5	6	3	1	2	2
665	2	4	1	3	1	1	0	2	0	1	3	2	4	1	3	1	1	0	2	0	1	3	2	4	5	2	1	1	3	1	2	2	4	2	2	2	4	7	6	8	5	2	1	2
666	2	4	1	3	1	1	0	2	0	1	3	2	4	1	3	1	1	0	2	0	1	3	2	3	4	2	1	1	1	1	1	2	3	4	4	2	4	5	5	6	5	2	2	2
667	2	4	1	3	1	1	0	2	0	1	3	2	4	1	3	1	1	0	2	0	1	3	2	4	4	1	0	1	4	1	1	4	4	2	2	2	4	7	7	7	2	2	3	2
668	2	4	1	3	1	1	0	2	0	1	3	2	4	1	3	1	1	0	2	0	1	3	4	3	4	1	1	0	1	1	1	4	4	3	4	2	4	5	7	5	5	1	3	3
669	2	4	1	3	1	1	0	2	0	1	3	2	4	1	3	1	1	0	2	0	1	3	4	3	4	1	97	97	3	2	3	4	4	3	4	2	4	5	8	8	8	2	3	4
670	2	4	1	3	1	1	0	2	0	1	3	2	4	1	3	1	1	0	2	0	1	3	4	3	4	2	1	1	2	2	2	3	2	2	2	2	4	5	5	5	5	2	1	2
671	2	4	1	3	1	1	0	2	0	1	3	2	4	1	3	1	1	0	2	0	1	3	3	4	5	1	97	97	2	2	2	4	2	2	2	1	4	6	4	7	3	2	3	3
672	2	4	1	3	1	1	0	2	0	1	3	2	4	1	3	1	1	0	2	0	1	3	2	4	4	2	1	1	3	1	3	2	4	3	2	2	4	4	4	4	1	2	1	4
673	2	4	1	3	1	1	0	2	0	1	3	2	4	1	3	1	1	0	2	0	1	3	2	4	4	2	1	1	4	2	3	4	2	2	2	2	4	6	5	9	5	2	3	4
674	2	4	1	3	1	1	0	3	0	1	3	2	4	1	3	1	1	0	3	0	1	3	4	4	4	2	1	1	1	1	1	2	4	4	4	2	3	5	5	5	2	2	3	2
675	2	4	1	3	1	1	0	3	0	1	3	2	4	1	3	1	1	0	3	0	1	3	2	4	4	2	1	1	1	1	1	4	2	4	4	2	4	4	4	3	4	1	2	3
676	2	4	1	3	1	1	0	3	0	1	3	2	4	1	3	1	1	0	3	0	1	3	3	2	4	2	0	2	2	1	1	4	4	2	4	-8	4	5	5	-8	1	2	2	3
677	2	4	1	3	1	1	0	3	0	1	3	2	4	1	3	1	1	0	3	0	1	3	5	3	4	0	0	0	3	3	2	1	1	2	1	2	4	4	2	5	1	2	2	1
678	2	4	1	3	1	1	0	3	0	1	3	2	4	1	3	1	1	0	3	0	1	3	4	4	4	2	0	2	2	1	1	4	4	2	4	2	4	5	5	5	2	1	3	3
679	2	4	1	3	1	1	0	3	0	1	3	2	4	1	3	1	1	0	3	0	1	3	4	4	4	1	0	1	1	1	1	4	4	4	4	2	4	5	4	4	2	-8	2	4
680	2	4	1	3	1	1	0	3	0	1	3	2	4	1	3	1	1	0	3	0	1	3	2	2	5	1	0	1	2	2	2	1	2	2	5	5	5	5	7	5	2	2	1	4
681	2	4	1	3	1	1	0	3	0	1	3	2	4	1	3	1	1	0	3	0	1	3	2	3	5	0	0	0	2	2	2	1	4	3	4	2	3	6	6	7	4	2	2	2
682	2	4	1	3	1	1	0	3	0	1	3	2	4	1	3	1	1	0	3	0	1	3	2	3	4	2	1	1	1	1	1	4	4	2	2	1	4	3	4	3	5	2	3	2
683	2	4	1	3	1	1	0	3	0	1	3	2	4	1	3	1	1	0	3	0	1	3	2	4	4	2	1	1	1	1	1	4	2	4	4	4	4	6	5	7	4	2	3	3
684	2	4	1	3	1	1	0	3	0	1	3	2	4	1	3	1	1	0	3	0	1	3	3	4	4	2	1	1	1	1	2	4	3	2	2	3	4	5	4	5	3	2	3	3
685	2	4	1	3	1	1	0	3	0	1	3	2	4	1	3	1	1	0	3	0	1	3	3	3	4	2	1	1	2	1	1	4	3	3	3	2	3	5	4	6	4	2	1	2
686	2	4	1	3	1	1	0	3	0	1	3	2	4	1	3	1	1	0	3	0	1	3	2	2	4	2	1	1	2	2	2	1	1	2	1	1	2	4	4	4	4	1	2	4
687	2	4	1	3	1	1	0	3	0	1	3	2	4	1	3	1	1	0	3	0	1	3	5	4	4	3	1	2	1	1	1	3	4	4	1	1	5	5	4	5	1	1	2	4
688	2	4	1	3	1	1	0	3	0	1	3	2	4	1	3	1	1	0	3	0	1	3	3	4	4	1	0	1	1	1	1	4	3	4	3	2	3	3	3	3	4	2	3	4
1127	2	4	1	3	1	1	6	2	0	1	3	2	4	1	3	1	1	6	2	0	1	3	4	3	4	2	1	1	1	1	3	-8	2	2	2	1	2	-8	5	1	5	1	3	1
1128	2	4	1	3	1	1	6	2	0	1	3	2	4	1	3	1	1	6	2	0	1	3	2	4	4	3	1	2	1	1	1	1	2	2	4	3	5	6	5	-8	5	1	3	3
1129	2	4	1	3	1	1	6	2	0	1	3	2	4	1	3	1	1	6	2	0	1	3	1	1	2	2	1	1	1	1	3	2	3	5	5	1	5	1	1	1	1	1	3	1
1130	2	4	1	3	1	1	6	2	0	1	3	2	4	1	3	1	1	6	2	0	1	3	4	1	4	2	1	1	1	1	1	2	2	2	1	2	4	5	2	7	1	1	3	2
1131	2	4	1	3	1	1	6	2	0	1	3	2	4	1	3	1	1	6	2	0	1	3	2	2	4	1	1	0	1	1	5	4	2	2	2	2	4	6	4	8	7	-8	-8	4
1132	2	4	1	3	1	1	6	2	0	1	3	2	4	1	3	1	1	6	2	0	1	3	5	1	4	2	1	1	1	1	1	2	5	1	2	2	4	1	1	1	1	1	3	1
1133	2	4	1	3	1	1	6	2	0	1	3	2	4	1	3	1	1	6	2	0	1	3	4	3	4	3	3	0	1	1	1	4	2	2	2	2	4	2	3	2	3	1	3	2
1134	2	4	1	3	1	1	6	2	0	1	3	2	4	1	3	1	1	6	2	0	1	3	4	1	4	2	1	1	1	1	1	4	2	1	3	1	3	3	6	-8	8	2	3	5
1135	2	4	1	3	1	1	6	2	0	1	3	2	4	1	3	1	1	6	2	0	1	3	4	2	4	2	2	0	1	1	1	2	5	2	1	1	4	3	2	3	4	1	3	2
1136	2	4	1	3	1	1	6	2	0	1	3	2	4	1	3	1	1	6	2	0	1	3	4	3	4	2	1	1	2	1	5	2	2	2	2	2	4	-8	-8	-8	-8	1	3	2
1137	2	4	1	3	1	1	6	2	0	1	3	2	4	1	3	1	1	6	2	0	1	3	4	2	4	2	1	1	2	2	2	3	5	5	5	5	4	2	1	3	1	2	3	4
1138	2	4	1	3	1	1	6	2	0	1	3	2	4	1	3	1	1	6	2	0	1	3	3	4	4	2	1	1	2	1	3	1	2	2	4	2	2	4	4	4	4	2	3	2
1139	2	4	1	3	1	1	6	2	0	1	3	2	4	1	3	1	1	6	2	0	1	3	4	4	4	2	1	1	1	1	1	4	5	5	4	2	3	5	4	6	5	2	3	2
1140	2	4	1	3	1	1	6	2	0	1	3	2	4	1	3	1	1	6	2	0	1	3	2	2	4	2	1	1	1	1	1	2	2	2	4	1	5	3	1	5	1	1	3	2
1141	2	4	1	3	1	1	6	2	0	1	3	2	4	1	3	1	1	6	2	0	1	3	5	2	4	97	97	97	3	1	-8	2	2	3	3	3	3	1	1	1	1	3	-8	-8
1142	2	4	1	3	1	1	6	2	0	1	3	2	4	1	3	1	1	6	2	0	1	3	3	2	4	2	97	97	3	3	3	2	2	2	2	2	5	5	3	6	3	2	3	4
1143	2	4	1	3	1	1	6	2	0	1	3	2	4	1	3	1	1	6	2	0	1	3	2	5	5	2	1	1	1	1	1	4	4	5	4	2	3	3	3	3	3	1	3	2
1144	2	4	1	3	1	1	6	2	0	1	3	2	4	1	3	1	1	6	2	0	1	3	4	2	3	1	1	0	1	1	1	4	4	2	3	2	5	5	5	5	4	2	3	2
1145	2	4	1	3	1	1	6	2	0	1	3	2	4	1	3	1	1	6	2	0	1	3	4	3	2	97	-2	-2	2	2	2	4	2	2	3	3	5	2	1	3	2	1	3	4
1146	2	4	1	3	1	1	6	2	0	1	3	2	4	1	3	1	1	6	2	0	1	3	4	3	4	1	97	97	1	2	1	1	4	4	4	2	4	5	4	6	5	1	3	2
1147	2	4	1	3	1	1	6	2	0	1	3	2	4	1	3	1	1	6	2	0	1	3	3	2	5	2	1	1	1	1	1	2	2	2	3	2	4	5	7	8	8	2	3	2
1148	2	4	1	3	1	1	6	2	0	1	3	2	4	1	3	1	1	6	2	0	1	3	3	2	2	-2	-2	-2	3	3	3	2	2	2	2	2	3	4	2	4	1	1	2	2
1149	2	4	1	3	1	1	6	2	0	1	3	2	4	1	3	1	1	6	2	0	1	3	4	2	4	2	1	1	4	1	4	4	4	2	4	2	4	4	5	7	5	3	3	4
1150	2	4	1	3	1	1	6	2	0	1	3	2	4	1	3	1	1	6	2	0	1	3	4	2	4	1	1	0	1	1	1	4	1	1	1	1	1	5	6	5	5	1	1	2
1151	2	4	1	3	1	1	6	2	0	1	3	2	4	1	3	1	1	6	2	0	1	3	5	4	5	2	1	1	1	1	1	4	2	4	4	2	4	4	3	5	4	1	3	2
1152	2	4	1	3	1	1	6	2	0	1	3	2	4	1	3	1	1	6	2	0	1	3	5	4	4	2	1	0	1	1	1	2	4	2	2	4	4	5	5	5	5	2	3	2
1153	2	4	1	3	1	1	6	2	0	1	3	2	4	1	3	1	1	6	2	0	1	3	3	4	5	-2	-2	-2	2	1	4	2	4	1	4	1	5	3	1	7	2	2	3	2
1154	2	4	1	3	1	1	6	2	0	1	3	2	4	1	3	1	1	6	2	0	1	3	4	1	2	2	97	97	2	2	2	4	3	2	4	2	2	2	2	2	2	2	3	2
1155	2	4	1	3	1	1	6	2	0	1	3	2	4	1	3	1	1	6	2	0	1	3	4	1	4	2	97	97	1	1	1	2	4	4	2	2	4	5	3	7	3	2	3	4
1156	2	4	1	3	1	1	6	2	0	1	3	2	4	1	3	1	1	6	2	0	1	3	4	4	4	2	1	1	1	1	3	2	4	2	3	2	4	6	4	7	3	2	1	2
1157	2	4	1	3	1	1	6	2	0	1	3	2	4	1	3	1	1	6	2	0	1	3	2	4	5	2	1	1	1	1	1	2	4	4	4	2	3	6	5	6	4	1	3	3
1158	2	4	1	3	1	1	6	2	0	1	3	2	4	1	3	1	1	6	2	0	1	3	2	4	5	-2	-2	-2	2	1	1	2	4	4	4	1	4	5	4	6	4	2	3	3
1159	2	4	1	3	1	1	6	2	0	1	3	2	4	1	3	1	1	6	2	0	1	3	4	4	4	97	97	97	1	1	1	4	1	2	2	1	4	2	1	2	1	1	3	4
1160	2	4	1	3	1	1	6	2	0	1	3	2	4	1	3	1	1	6	2	0	1	3	4	3	4	2	1	1	3	1	3	4	4	4	5	2	4	4	4	6	4	2	3	4
1161	2	4	1	3	1	1	6	2	0	1	3	2	4	1	3	1	1	6	2	0	1	3	5	4	4	2	1	1	1	1	1	2	4	2	4	2	4	5	4	5	2	2	3	3
1162	2	4	1	3	1	1	6	2	0	1	3	2	4	1	3	1	1	6	2	0	1	3	3	4	5	2	1	1	2	2	1	2	4	3	2	2	4	2	1	2	1	1	3	4
1163	2	4	1	3	1	1	6	2	0	1	3	2	4	1	3	1	1	6	2	0	1	3	4	1	4	2	1	1	1	1	1	4	4	4	4	4	5	1	1	1	1	1	3	2
1164	2	4	1	3	1	1	6	2	0	1	3	2	4	1	3	1	1	6	2	0	1	3	4	4	5	1	97	97	3	2	5	4	1	1	5	1	4	2	2	5	2	2	3	3
1165	2	4	1	3	1	1	6	2	0	1	3	2	4	1	3	1	1	6	2	0	1	3	4	4	5	3	2	1	1	1	1	2	4	2	2	2	4	2	1	2	1	1	3	2
1166	2	4	1	3	1	1	6	2	0	1	3	2	4	1	3	1	1	6	2	0	1	3	4	2	4	1	1	0	4	2	1	-8	2	4	2	-8	-8	5	7	-8	-8	2	2	2
1167	2	4	1	3	1	1	6	2	0	1	3	2	4	1	3	1	1	6	2	0	1	3	4	3	5	2	1	1	1	1	1	4	4	4	2	2	4	5	3	7	2	2	3	4
1168	2	4	1	3	1	1	6	2	0	1	3	2	4	1	3	1	1	6	2	0	1	3	2	4	4	3	2	1	1	1	1	2	4	4	3	3	2	4	4	4	4	1	2	2
1169	2	4	1	3	1	1	6	2	0	1	3	2	4	1	3	1	1	6	2	0	1	3	3	4	4	2	1	1	1	1	3	2	4	2	4	2	4	5	4	6	4	1	3	2
1170	2	4	1	3	1	1	6	2	0	1	3	2	4	1	3	1	1	6	2	0	1	3	3	4	4	2	1	1	1	1	1	4	2	2	3	2	4	3	2	3	1	1	3	2
1171	2	4	1	3	1	1	6	2	0	1	3	2	4	1	3	1	1	6	2	0	1	3	2	4	4	2	1	1	1	1	3	2	4	2	4	2	4	5	5	6	3	1	3	4
1172	2	4	1	3	1	1	6	2	0	1	3	2	4	1	3	1	1	6	2	0	1	3	4	3	4	2	1	1	1	1	1	2	4	4	3	2	4	5	5	5	5	1	3	2
1173	2	4	1	3	1	1	6	2	0	1	3	2	4	1	3	1	1	6	2	0	1	3	2	2	3	-2	-2	-2	1	1	3	4	2	2	2	2	4	3	1	5	1	2	3	2
1174	2	4	1	3	1	1	6	2	0	1	3	2	4	1	3	1	1	6	2	0	1	3	4	2	2	2	1	1	1	1	1	2	4	2	4	3	4	4	5	3	5	2	3	2
1175	2	4	1	3	1	1	6	2	0	1	3	2	4	1	3	1	1	6	2	0	1	3	4	4	5	2	1	1	1	1	1	4	4	4	2	1	3	5	6	5	4	2	3	2
1176	2	4	1	3	1	1	6	2	0	1	3	2	4	1	3	1	1	6	2	0	1	3	3	2	4	-2	-2	-2	1	1	3	2	4	1	4	1	5	5	5	8	4	2	3	1
1177	2	4	1	3	1	1	6	2	0	1	3	2	4	1	3	1	1	6	2	0	1	3	2	2	4	2	1	1	3	1	3	2	2	2	2	2	3	-8	-8	-8	-8	2	3	3
1178	2	4	1	3	1	1	6	2	0	1	3	2	4	1	3	1	1	6	2	0	1	3	3	2	2	2	1	1	2	1	1	4	2	2	3	2	4	2	3	2	3	2	3	2
1179	2	4	1	3	1	1	6	2	0	1	3	2	4	1	3	1	1	6	2	0	1	3	3	2	4	2	1	1	1	1	1	4	2	2	2	2	4	3	3	-8	-8	1	3	2
1180	2	4	1	3	1	1	6	2	0	1	3	2	4	1	3	1	1	6	2	0	1	3	4	2	1	97	97	97	1	1	1	1	3	2	4	2	4	-8	-8	-8	-8	1	3	4
1181	2	4	1	3	1	1	6	2	0	1	3	2	4	1	3	1	1	6	2	0	1	3	4	3	4	2	1	1	1	1	1	4	4	3	4	2	4	4	3	5	3	1	3	4
1182	2	4	1	3	1	1	6	2	0	1	3	2	4	1	3	1	1	6	2	0	1	3	2	4	4	3	2	1	2	2	3	2	4	2	2	3	4	3	3	4	3	1	3	3
1183	2	4	1	3	1	1	6	2	0	1	3	2	4	1	3	1	1	6	2	0	1	3	4	2	5	1	1	0	1	1	1	2	2	5	2	2	4	4	1	5	1	2	3	3
1184	2	4	1	3	1	1	6	2	0	1	3	2	4	1	3	1	1	6	2	0	1	3	2	3	4	2	1	1	3	1	1	4	2	2	2	2	2	4	4	4	4	2	1	2
1185	2	4	1	3	1	1	6	2	0	1	3	2	4	1	3	1	1	6	2	0	1	3	2	3	4	2	1	1	1	2	3	2	4	4	2	1	3	5	4	6	6	1	3	3
1186	2	4	1	3	1	1	6	2	0	1	3	2	4	1	3	1	1	6	2	0	1	3	3	4	4	4	2	2	1	1	3	2	3	2	2	1	5	7	7	8	5	2	3	4
1187	2	4	1	3	1	1	6	2	0	1	3	2	4	1	3	1	1	6	2	0	1	3	2	4	5	-2	97	97	3	1	1	2	2	4	5	2	4	5	5	6	5	2	3	2
1188	2	4	1	3	1	1	6	2	0	1	3	2	4	1	3	1	1	6	2	0	1	3	3	3	3	2	97	97	1	1	1	1	2	2	2	2	4	5	4	6	2	1	2	4
1189	2	4	1	3	1	1	6	2	0	1	3	2	4	1	3	1	1	6	2	0	1	3	2	2	4	1	1	0	2	1	3	2	4	1	4	1	5	3	1	6	1	2	3	2
1190	2	4	1	3	1	1	6	2	0	1	3	2	4	1	3	1	1	6	2	0	1	3	4	2	4	2	1	1	1	2	2	2	2	2	2	1	1	5	3	6	2	2	3	4
1191	2	4	1	3	1	1	6	2	0	1	3	2	4	1	3	1	1	6	2	0	1	3	5	2	5	3	1	2	1	1	1	4	4	4	4	2	4	1	1	1	1	1	3	2
1192	2	4	1	3	1	1	6	2	0	1	3	2	4	1	3	1	1	6	2	0	1	3	3	4	3	2	1	1	1	1	3	2	4	2	4	2	4	4	3	6	3	1	3	2
1193	2	4	1	3	1	1	6	2	0	1	3	2	4	1	3	1	1	6	2	0	1	3	4	4	5	2	1	1	3	1	1	4	4	2	2	2	4	2	2	4	2	2	3	4
1194	2	4	1	3	1	1	6	2	0	1	3	2	4	1	3	1	1	6	2	0	1	3	4	4	3	2	1	1	2	1	2	1	4	3	4	2	4	1	1	1	1	1	2	2
1195	2	4	1	3	1	1	6	2	0	1	3	2	4	1	3	1	1	6	2	0	1	3	2	4	4	2	1	1	2	1	3	3	4	2	4	1	5	5	4	6	6	1	3	3
1196	2	4	1	3	1	1	6	2	0	1	3	2	4	1	3	1	1	6	2	0	1	3	3	2	5	2	1	1	2	1	1	2	2	4	5	2	5	5	5	7	7	2	3	5
1197	2	4	1	3	1	1	6	2	0	1	3	2	4	1	3	1	1	6	2	0	1	3	3	4	5	1	1	0	2	1	3	2	5	5	2	1	5	5	5	8	6	2	1	2
1198	2	4	1	3	1	1	6	2	0	1	3	2	4	1	3	1	1	6	2	0	1	3	4	2	4	2	1	1	2	1	2	2	2	1	4	2	5	5	3	5	3	1	3	4
1199	2	4	1	3	1	1	6	2	0	1	3	2	4	1	3	1	1	6	2	0	1	3	4	2	2	2	1	1	1	1	1	2	2	1	4	1	4	1	1	1	1	2	3	4
1200	2	4	1	3	1	1	6	2	0	1	3	2	4	1	3	1	1	6	2	0	1	3	4	4	5	2	1	1	1	1	1	4	5	2	2	2	4	3	2	5	-8	2	3	4
1201	2	4	1	3	1	1	6	2	0	1	3	2	4	1	3	1	1	6	2	0	1	3	2	4	4	2	1	1	1	1	3	3	4	2	4	2	4	4	5	6	5	1	3	2
1202	2	4	1	3	1	1	6	2	0	1	3	2	4	1	3	1	1	6	2	0	1	3	4	3	4	2	1	1	1	1	4	2	4	2	4	2	4	3	2	5	2	1	3	2
1203	2	4	1	3	1	1	6	2	0	1	3	2	4	1	3	1	1	6	2	0	1	3	3	4	5	2	1	1	2	1	1	2	3	2	3	1	3	5	1	6	1	2	3	2
1204	2	4	1	3	1	1	6	2	0	1	3	2	4	1	3	1	1	6	2	0	1	3	3	2	4	2	1	1	2	2	2	4	2	2	2	2	4	2	3	3	2	1	3	2
1205	2	4	1	3	1	1	6	2	0	1	3	2	4	1	3	1	1	6	2	0	1	3	3	2	4	1	1	0	1	1	1	4	2	2	3	3	3	5	5	-8	5	2	1	2
1206	2	4	1	3	1	1	6	2	0	1	3	2	4	1	3	1	1	6	2	0	1	3	4	2	3	3	2	1	1	1	1	2	4	4	2	2	4	4	5	6	5	2	3	4
1207	2	4	1	3	1	1	6	2	0	1	3	2	4	1	3	1	1	6	2	0	1	3	4	4	4	2	1	1	1	1	3	2	5	5	4	2	5	5	7	5	1	2	3	1
1208	2	4	1	3	1	1	6	2	0	1	3	2	4	1	3	1	1	6	2	0	1	3	3	3	4	2	0	2	2	1	4	4	1	1	2	1	5	3	2	5	3	2	3	4
1209	2	4	1	3	1	1	6	2	0	1	3	2	4	1	3	1	1	6	2	0	1	3	4	2	4	2	1	1	2	1	3	2	2	2	3	1	4	3	2	3	2	2	1	3
1210	2	4	1	3	1	1	6	2	0	1	3	2	4	1	3	1	1	6	2	0	1	3	2	2	2	3	2	1	2	1	1	3	3	3	3	3	4	3	3	3	3	2	3	2
1211	2	4	1	3	1	1	6	2	0	1	3	2	4	1	3	1	1	6	2	0	1	3	3	3	5	1	1	0	2	2	2	4	4	3	3	2	3	5	5	6	3	1	3	2
1212	2	4	1	3	1	1	6	2	0	1	3	2	4	1	3	1	1	6	2	0	1	3	2	4	4	4	2	2	3	1	3	2	2	2	2	2	4	5	3	4	3	1	3	3
1213	2	4	1	3	1	1	6	2	0	1	3	2	4	1	3	1	1	6	2	0	1	3	2	3	4	2	1	1	1	1	1	4	4	4	4	2	2	5	8	4	9	3	1	4
1214	2	4	1	3	1	1	6	2	0	1	3	2	4	1	3	1	1	6	2	0	1	3	2	2	5	2	97	97	1	1	1	1	2	2	2	2	4	5	4	6	2	1	1	2
1215	2	4	1	3	1	1	6	2	0	1	3	2	4	1	3	1	1	6	2	0	1	3	2	2	5	2	1	1	2	1	3	2	2	2	4	1	5	3	3	5	2	1	3	4
1216	2	4	1	3	1	1	6	2	0	1	3	2	4	1	3	1	1	6	2	0	1	3	3	2	5	2	1	1	1	1	1	4	1	2	4	1	4	4	3	4	6	2	2	4
1217	2	4	1	3	1	1	6	2	0	1	3	2	4	1	3	1	1	6	2	0	1	3	2	2	4	2	1	1	3	1	3	4	2	2	2	2	5	5	3	6	4	1	1	2
1218	2	4	1	3	1	1	6	2	0	1	3	2	4	1	3	1	1	6	2	0	1	3	4	3	4	4	3	1	1	1	3	2	4	4	3	3	3	2	3	3	2	1	3	-8
1219	2	4	1	3	1	1	6	2	0	1	3	2	4	1	3	1	1	6	2	0	1	3	4	2	3	2	1	1	1	1	-8	4	4	2	4	2	4	4	2	5	1	1	3	4
1220	2	4	1	3	1	1	6	2	0	1	3	2	4	1	3	1	1	6	2	0	1	3	3	3	4	2	1	1	2	1	1	3	2	2	2	2	2	5	5	5	5	2	3	3
1221	2	4	1	3	1	1	6	2	0	1	3	2	4	1	3	1	1	6	2	0	1	3	4	5	5	3	2	1	1	1	3	2	4	3	3	2	5	6	5	9	3	1	3	2
1222	2	4	1	3	1	1	6	2	0	1	3	2	4	1	3	1	1	6	2	0	1	3	3	4	4	2	1	1	2	2	3	3	2	2	4	1	4	4	2	5	5	1	3	2
1223	2	4	1	3	1	1	6	2	0	1	3	2	4	1	3	1	1	6	2	0	1	3	1	4	4	2	1	1	1	1	1	2	4	2	1	1	2	5	5	6	6	3	3	1
1224	2	4	1	3	1	1	6	2	0	1	3	2	4	1	3	1	1	6	2	0	1	3	5	1	5	2	1	1	1	1	1	2	5	5	3	3	5	3	1	4	1	1	3	1
1225	2	4	1	3	1	1	6	2	0	1	3	2	4	1	3	1	1	6	2	0	1	3	2	4	4	-2	-2	-2	3	3	3	4	3	4	3	3	4	5	5	5	5	2	3	3
1226	2	4	1	3	1	1	6	2	0	1	3	2	4	1	3	1	1	6	2	0	1	3	4	3	4	2	1	1	1	1	3	4	4	2	3	2	5	5	6	6	4	2	3	2
1227	2	4	1	3	1	1	6	2	0	1	3	2	4	1	3	1	1	6	2	0	1	3	4	1	2	1	97	97	1	1	1	4	4	3	4	2	2	3	3	3	-8	2	1	4
1228	2	4	1	3	1	1	6	2	0	1	3	2	4	1	3	1	1	6	2	0	1	3	4	3	5	2	1	1	1	1	1	4	3	4	5	3	3	2	2	2	2	1	3	2
1229	2	4	1	3	1	1	6	2	0	1	3	2	4	1	3	1	1	6	2	0	1	3	3	3	4	-2	-2	-2	1	1	1	2	1	1	1	1	1	-8	5	8	5	2	3	2
1230	2	4	1	3	1	1	6	2	0	1	3	2	4	1	3	1	1	6	2	0	1	3	4	3	3	97	97	97	2	2	1	2	4	4	4	4	4	2	1	3	1	1	3	2
1231	2	4	1	3	1	1	6	2	0	1	3	2	4	1	3	1	1	6	2	0	1	3	2	1	2	1	97	97	4	2	2	2	2	2	2	2	3	5	4	6	3	1	2	2
1232	2	4	1	3	1	1	6	2	0	1	3	2	4	1	3	1	1	6	2	0	1	3	2	4	4	2	2	0	1	1	1	2	4	2	2	2	4	4	3	6	4	1	3	2
1233	2	4	1	3	1	1	6	2	0	1	3	2	4	1	3	1	1	6	2	0	1	3	3	4	4	2	1	1	1	1	1	4	4	2	2	2	4	5	4	6	4	1	3	4
1234	2	4	1	3	1	1	6	2	0	1	3	2	4	1	3	1	1	6	2	0	1	3	4	4	4	2	1	1	1	1	1	4	4	4	4	2	4	5	3	5	3	2	3	4
1235	2	4	1	3	1	1	5	2	0	1	3	2	4	1	3	1	1	5	2	0	1	3	4	4	2	2	1	1	3	2	3	2	2	1	4	2	5	4	4	7	3	2	3	2
1236	2	4	1	3	1	1	5	2	0	1	3	2	4	1	3	1	1	5	2	0	1	3	3	2	3	2	1	1	2	1	1	4	2	2	3	3	3	5	5	4	4	1	3	3
1237	2	4	1	3	1	1	5	2	0	1	3	2	4	1	3	1	1	5	2	0	1	3	3	3	5	3	1	2	1	1	1	4	2	2	4	2	4	4	4	4	4	2	3	2
1238	2	4	1	3	1	1	5	2	0	1	3	2	4	1	3	1	1	5	2	0	1	3	4	1	4	2	1	1	1	1	1	1	2	2	3	2	2	5	3	6	2	1	3	2
1239	2	4	1	3	1	1	5	2	0	1	3	2	4	1	3	1	1	5	2	0	1	3	4	1	4	2	1	1	1	1	1	2	2	2	2	1	4	6	6	7	7	2	3	4
1240	2	4	1	3	1	1	5	2	0	1	3	2	4	1	3	1	1	5	2	0	1	3	2	4	4	2	1	1	1	1	3	2	4	2	4	2	5	5	4	5	4	1	3	2
1241	2	4	1	3	1	1	5	2	0	1	3	2	4	1	3	1	1	5	2	0	1	3	2	4	4	2	1	1	2	1	3	4	4	4	3	2	3	5	4	5	3	1	3	2
1242	2	4	1	3	1	1	5	2	0	1	3	2	4	1	3	1	1	5	2	0	1	3	5	2	3	2	1	1	2	2	2	1	4	4	4	3	2	4	4	5	4	2	3	3
1243	2	4	1	3	1	1	5	2	0	1	3	2	4	1	3	1	1	5	2	0	1	3	2	4	4	2	2	0	1	1	3	2	4	2	3	2	4	5	5	6	5	1	3	4
1244	2	4	1	3	1	1	5	2	0	1	3	2	4	1	3	1	1	5	2	0	1	3	4	4	4	2	1	1	1	1	1	1	4	2	2	2	4	3	2	6	2	1	3	2
1245	2	4	1	3	1	1	5	2	0	1	3	2	4	1	3	1	1	5	2	0	1	3	4	4	5	2	1	1	2	1	3	4	4	3	3	1	4	5	4	7	4	2	3	4
1246	2	4	1	3	1	1	5	2	0	1	3	2	4	1	3	1	1	5	2	0	1	3	2	4	4	2	1	1	2	2	1	4	2	2	2	1	4	5	4	6	4	1	3	2
1247	2	4	1	3	1	1	5	2	0	1	3	2	4	1	3	1	1	5	2	0	1	3	4	3	4	2	1	1	1	1	1	4	4	3	3	2	4	5	5	6	4	1	3	4
1248	2	4	1	3	1	1	4	2	0	1	3	2	4	1	3	1	1	4	2	0	1	3	4	2	4	1	1	0	1	1	1	2	4	4	4	2	4	2	2	5	1	2	1	4
1249	2	4	1	3	1	1	4	2	0	1	3	2	4	1	3	1	1	4	2	0	1	3	2	3	3	4	3	1	1	1	3	1	4	4	3	3	2	4	3	4	4	1	3	2
1250	2	4	1	3	1	1	4	2	0	1	3	2	4	1	3	1	1	4	2	0	1	3	2	4	5	2	1	1	1	1	1	2	1	1	5	1	5	5	3	8	3	3	3	2
1251	2	4	1	3	1	1	4	2	0	1	3	2	4	1	3	1	1	4	2	0	1	3	2	5	4	2	97	97	2	1	1	4	2	1	4	2	2	7	3	7	3	2	3	2
1252	2	4	1	3	1	1	4	2	0	1	3	2	4	1	3	1	1	4	2	0	1	3	4	4	4	1	0	1	1	1	1	4	3	4	4	4	3	2	1	3	1	1	3	4
1253	2	4	1	3	1	1	4	2	0	1	3	2	4	1	3	1	1	4	2	0	1	3	3	4	4	2	1	1	1	1	3	3	2	2	3	2	4	5	5	5	3	1	3	4
1254	2	4	1	3	1	1	4	2	0	1	3	2	4	1	3	1	1	4	2	0	1	3	2	4	5	2	1	1	2	1	1	2	1	1	2	1	4	8	6	8	5	2	3	4
1255	2	4	1	3	1	1	4	2	0	1	3	2	4	1	3	1	1	4	2	0	1	3	3	4	5	2	1	1	1	1	1	2	4	3	3	2	4	3	2	3	1	1	3	2
1256	2	4	1	3	1	1	4	2	0	1	3	2	4	1	3	1	1	4	2	0	1	3	4	2	4	2	1	1	1	1	3	3	2	2	4	2	5	2	2	6	3	1	3	2
1257	2	4	1	3	1	1	4	2	0	1	3	2	4	1	3	1	1	4	2	0	1	3	4	2	5	2	1	1	1	1	1	1	4	4	4	4	4	4	5	5	3	1	1	5
1258	2	4	1	3	1	1	4	2	0	1	3	2	4	1	3	1	1	4	2	0	1	3	2	4	4	2	1	1	1	1	1	2	2	2	4	2	4	2	2	2	2	2	3	4
1259	2	4	1	3	1	1	4	2	0	1	3	2	4	1	3	1	1	4	2	0	1	3	2	2	5	2	1	1	3	1	1	2	2	2	2	2	4	1	1	1	1	2	3	2
1260	2	4	1	3	1	1	4	2	0	1	3	2	4	1	3	1	1	4	2	0	1	3	2	4	5	3	2	1	2	1	2	2	4	2	2	2	2	4	4	4	4	1	1	2
1261	2	4	1	3	1	1	4	2	0	1	3	2	4	1	3	1	1	4	2	0	1	3	1	2	4	1	1	0	1	1	1	4	2	2	2	2	5	6	6	6	6	1	1	2
1262	2	4	1	3	1	1	4	2	0	1	3	2	4	1	3	1	1	4	2	0	1	3	3	1	3	2	1	1	3	1	3	2	3	3	3	1	4	3	9	10	8	2	3	5
1263	2	4	1	3	1	1	4	2	0	1	3	2	4	1	3	1	1	4	2	0	1	3	2	1	4	2	1	1	1	1	1	2	4	2	3	2	5	3	1	4	1	1	3	2
1264	2	4	1	3	1	1	4	2	0	1	3	2	4	1	3	1	1	4	2	0	1	3	2	2	4	1	97	97	3	3	1	3	2	2	2	2	4	4	3	-8	2	1	3	-8
1265	2	4	1	3	1	1	4	2	0	1	3	2	4	1	3	1	1	4	2	0	1	3	3	3	4	2	1	1	1	1	1	4	4	4	3	2	3	5	6	5	3	1	3	2
1266	2	4	1	3	1	1	4	2	0	1	3	2	4	1	3	1	1	4	2	0	1	3	2	4	5	2	1	1	1	1	1	2	4	4	3	2	4	5	5	6	5	1	3	3
1267	2	4	1	3	1	1	4	2	0	1	3	2	4	1	3	1	1	4	2	0	1	3	4	4	4	2	1	1	3	1	2	4	4	4	4	2	4	5	5	7	5	2	3	2
1268	2	4	1	3	1	1	4	2	0	1	3	2	4	1	3	1	1	4	2	0	1	3	3	1	5	2	1	1	3	1	1	2	2	3	5	1	3	5	5	10	5	2	3	1
1269	2	4	1	3	1	1	4	2	0	1	3	2	4	1	3	1	1	4	2	0	1	3	3	4	4	2	1	1	1	1	1	4	4	4	4	2	2	5	6	5	3	1	3	2
1270	2	4	1	3	1	1	4	2	0	1	3	2	4	1	3	1	1	4	2	0	1	3	2	3	5	-2	97	97	2	3	1	3	1	1	2	2	2	-8	-8	-8	-8	1	3	4
1271	2	4	1	3	1	1	4	2	0	1	3	2	4	1	3	1	1	4	2	0	1	3	2	4	4	2	1	1	1	1	3	2	4	2	4	2	4	3	2	5	3	1	3	2
1272	2	4	1	3	1	1	4	2	0	1	3	2	4	1	3	1	1	4	2	0	1	3	3	3	4	3	2	1	1	1	1	2	4	4	4	1	3	2	1	3	1	1	3	2
1273	2	4	1	3	1	1	4	2	0	1	3	2	4	1	3	1	1	4	2	0	1	3	3	4	4	2	1	1	4	1	4	3	2	2	4	2	4	6	5	7	5	1	1	3
1274	2	4	1	3	1	1	4	2	0	1	3	2	4	1	3	1	1	4	2	0	1	3	3	3	4	2	1	1	1	1	2	4	3	3	3	3	3	4	4	4	4	2	3	2
1275	2	4	1	3	1	1	4	2	0	1	3	2	4	1	3	1	1	4	2	0	1	3	2	4	4	3	2	1	2	1	3	1	4	2	3	3	4	5	5	5	5	1	1	2
1276	2	4	1	3	1	1	4	2	0	1	3	2	4	1	3	1	1	4	2	0	1	3	4	2	4	2	1	1	1	1	1	3	1	2	2	5	3	2	1	2	2	2	3	4
1277	2	4	1	3	1	1	4	2	0	1	3	2	4	1	3	1	1	4	2	0	1	3	2	-8	4	2	1	1	1	1	3	2	2	1	2	1	5	2	4	3	6	1	1	4
1278	2	4	1	2	1	1	4	2	0	1	3	2	4	1	2	1	1	4	2	0	1	3	5	4	5	1	1	0	1	1	2	2	4	2	2	1	2	4	3	4	1	1	3	2
1279	2	4	1	2	1	1	4	2	0	1	3	2	4	1	2	1	1	4	2	0	1	3	2	4	4	2	1	1	4	1	4	2	1	4	3	2	2	3	1	5	3	2	3	3
1280	2	4	1	2	1	1	4	2	0	1	3	2	4	1	2	1	1	4	2	0	1	3	4	2	3	2	1	1	2	2	2	4	4	2	2	2	4	2	2	3	1	1	3	2
1281	2	4	1	2	1	1	4	2	0	1	3	2	4	1	2	1	1	4	2	0	1	3	4	4	4	2	1	1	2	1	3	4	2	2	2	2	4	6	6	5	5	2	2	2
1282	2	4	1	2	1	1	4	2	0	1	3	2	4	1	2	1	1	4	2	0	1	3	4	3	5	2	1	1	2	1	1	4	1	1	2	1	5	2	1	3	1	1	3	3
1283	2	4	1	2	1	1	4	2	0	1	3	2	4	1	2	1	1	4	2	0	1	3	4	2	2	1	1	0	4	1	1	2	4	4	4	2	4	5	4	-8	3	1	3	1
1284	2	4	1	2	1	1	4	2	0	1	3	2	4	1	2	1	1	4	2	0	1	3	3	3	4	4	2	2	1	1	-8	1	2	2	2	2	4	4	4	5	3	2	1	2
1285	2	4	1	2	1	1	4	2	0	1	3	2	4	1	2	1	1	4	2	0	1	3	4	4	4	6	4	2	1	1	1	2	4	2	2	2	4	3	2	3	2	2	3	1
1286	2	4	1	2	1	1	4	2	0	1	3	2	4	1	2	1	1	4	2	0	1	3	2	4	5	2	1	1	2	1	1	2	2	2	2	1	4	3	2	6	4	1	3	2
1287	2	4	1	2	1	1	4	2	0	1	3	2	4	1	2	1	1	4	2	0	1	3	4	4	5	2	1	1	1	1	3	4	5	4	3	1	2	2	2	7	2	1	3	4
1288	2	4	1	2	1	1	4	2	0	1	3	2	4	1	2	1	1	4	2	0	1	3	2	4	4	2	1	1	2	1	1	4	4	2	2	2	4	5	6	4	4	1	3	4
1289	2	4	1	2	1	1	4	2	0	1	3	2	4	1	2	1	1	4	2	0	1	3	3	3	4	2	1	1	1	1	1	1	4	4	4	3	3	3	3	3	2	1	3	-8
1290	2	4	1	2	1	1	4	2	0	1	3	2	4	1	2	1	1	4	2	0	1	3	4	2	4	2	1	1	3	1	-8	4	2	2	4	1	5	3	2	5	5	2	3	2
1291	2	4	1	2	1	1	4	2	0	1	3	2	4	1	2	1	1	4	2	0	1	3	2	3	4	3	2	1	3	1	3	1	4	3	3	2	4	4	4	4	3	2	3	2
1292	2	4	1	2	1	1	4	2	0	1	3	2	4	1	2	1	1	4	2	0	1	3	4	4	4	2	1	1	4	2	3	2	2	1	4	2	4	4	3	5	3	2	3	4
1293	2	4	1	2	1	1	4	2	0	1	3	2	4	1	2	1	1	4	2	0	1	3	4	2	5	97	97	97	1	1	1	3	2	2	3	2	4	6	5	7	5	2	1	2
1294	2	4	1	2	1	1	4	2	0	1	3	2	4	1	2	1	1	4	2	0	1	3	3	3	4	2	1	1	3	1	4	2	2	2	4	1	4	3	2	5	3	2	3	4
1295	2	4	1	2	1	1	4	2	0	1	3	2	4	1	2	1	1	4	2	0	1	3	2	2	2	3	2	1	1	1	3	3	2	2	4	2	4	3	3	5	3	1	3	2
1296	2	4	1	2	1	1	4	2	0	1	3	2	4	1	2	1	1	4	2	0	1	3	4	3	4	1	1	0	-8	1	1	2	4	2	4	2	2	6	5	7	5	2	3	4
1297	2	4	1	2	1	1	4	2	0	1	3	2	4	1	2	1	1	4	2	0	1	3	3	4	4	2	0	2	3	1	4	4	1	1	1	1	5	3	2	4	2	2	3	4
1298	2	4	1	2	1	1	4	2	0	1	3	2	4	1	2	1	1	4	2	0	1	3	5	1	1	-2	1	0	1	1	1	4	2	2	3	2	4	2	2	2	2	1	3	3
1299	2	4	1	2	1	1	4	2	0	1	3	2	4	1	2	1	1	4	2	0	1	3	4	3	4	2	1	1	1	1	2	4	4	4	4	2	4	3	3	4	3	2	3	2
1300	2	4	1	2	1	1	4	2	0	1	3	2	4	1	2	1	1	4	2	0	1	3	2	4	4	4	2	2	2	2	2	4	4	-8	3	2	2	2	3	3	1	2	3	-8
1301	2	4	1	2	1	1	4	2	0	1	3	2	4	1	2	1	1	4	2	0	1	3	4	3	4	1	1	0	2	1	3	2	2	2	4	1	4	3	2	3	2	2	3	3
1302	2	4	1	2	1	1	4	2	0	1	3	2	4	1	2	1	1	4	2	0	1	3	4	2	4	1	1	0	3	2	1	2	4	2	4	2	5	4	2	6	2	2	3	4
1303	2	4	1	2	1	1	4	2	0	1	3	2	4	1	2	1	1	4	2	0	1	3	4	4	5	2	1	1	1	1	1	2	4	5	3	4	5	3	2	5	1	1	3	2
1304	2	4	1	2	1	1	4	2	0	1	3	2	4	1	2	1	1	4	2	0	1	3	2	3	4	2	0	2	2	1	2	2	4	2	2	1	4	3	3	4	2	2	3	2
1305	2	4	1	2	1	1	4	2	0	1	3	2	4	1	2	1	1	4	2	0	1	3	2	2	5	1	0	1	1	1	3	2	5	5	5	2	5	5	4	8	4	2	3	2
1306	2	4	1	2	1	1	4	2	0	1	3	2	4	1	2	1	1	4	2	0	1	3	4	4	3	2	1	1	1	1	1	2	4	4	4	2	4	3	2	4	2	2	3	4
1307	2	4	1	2	1	1	4	2	0	1	3	2	4	1	2	1	1	4	2	0	1	3	4	3	4	2	1	1	1	1	1	2	4	4	3	2	4	4	2	6	1	2	3	4
1308	2	4	1	2	1	1	4	2	0	1	3	2	4	1	2	1	1	4	2	0	1	3	4	2	2	1	97	97	4	2	1	1	2	2	4	2	4	1	1	1	6	2	1	4
1309	2	4	1	2	1	1	4	2	0	1	3	2	4	1	2	1	1	4	2	0	1	3	4	2	4	6	3	3	1	1	3	4	4	4	4	-8	4	4	3	3	2	1	3	4
1310	2	4	1	2	1	1	4	2	0	1	0	2	4	1	2	1	1	4	2	0	1	0	5	3	5	2	97	97	1	1	3	4	2	1	1	1	5	5	5	5	7	2	1	4
1311	2	4	1	2	1	1	4	2	0	1	0	2	4	1	2	1	1	4	2	0	1	0	2	4	4	1	1	0	3	1	1	2	2	4	2	2	4	3	3	3	1	1	3	2
1312	2	4	1	2	1	1	4	2	0	1	0	2	4	1	2	1	1	4	2	0	1	0	2	2	3	2	1	1	2	2	2	2	2	2	2	2	4	2	2	3	2	1	3	4
1313	2	4	1	2	1	1	4	2	0	1	0	2	4	1	2	1	1	4	2	0	1	0	3	4	5	-2	-2	-2	1	1	2	2	4	4	2	2	-8	4	3	7	3	3	3	3
1314	2	4	1	2	1	1	4	2	0	1	0	2	4	1	2	1	1	4	2	0	1	0	3	4	5	2	1	1	2	1	2	4	2	2	1	2	4	5	4	5	4	2	1	2
1315	2	4	1	2	1	1	4	2	0	1	0	2	4	1	2	1	1	4	2	0	1	0	4	4	3	2	1	1	1	1	1	4	4	4	5	2	4	5	5	6	5	2	3	2
1316	2	4	1	2	1	1	4	2	0	1	0	2	4	1	2	1	1	4	2	0	1	0	4	2	4	2	1	1	3	1	1	4	2	2	4	2	4	6	6	6	6	2	3	4
1317	2	4	1	2	1	1	4	2	0	1	0	2	4	1	2	1	1	4	2	0	1	0	2	2	4	2	1	1	3	1	1	2	4	2	2	2	4	5	4	6	3	2	1	5
1318	2	4	1	2	1	1	4	2	0	1	0	2	4	1	2	1	1	4	2	0	1	0	4	2	4	2	1	1	1	1	3	4	4	2	2	2	4	4	3	5	4	2	3	2
1319	2	4	1	2	1	1	4	2	0	1	0	2	4	1	2	1	1	4	2	0	1	0	4	2	4	2	1	1	2	3	3	2	3	2	3	2	4	4	3	5	3	2	1	1
1320	2	4	1	2	1	1	4	2	0	1	0	2	4	1	2	1	1	4	2	0	1	0	2	4	5	2	1	1	1	1	1	1	4	4	4	4	4	5	5	5	5	1	3	2
1321	2	4	1	2	1	1	4	2	0	1	0	2	4	1	2	1	1	4	2	0	1	0	3	2	4	97	97	97	2	2	2	2	4	4	2	2	4	2	1	3	1	1	3	-8
1322	2	4	1	2	1	1	4	2	0	1	0	2	4	1	2	1	1	4	2	0	1	0	3	4	5	2	1	1	2	2	3	2	4	2	2	2	3	4	4	4	4	1	3	4
1323	2	4	1	2	1	1	4	2	0	1	0	2	4	1	2	1	1	4	2	0	1	0	3	4	4	2	1	1	2	2	1	4	2	3	3	2	4	2	1	5	1	2	3	4
1324	2	4	1	2	1	1	4	2	0	1	0	2	4	1	2	1	1	4	2	0	1	0	3	4	5	2	1	1	1	1	1	4	2	2	2	2	4	2	1	3	1	2	3	4
1325	2	4	1	2	1	1	4	2	0	1	0	2	4	1	2	1	1	4	2	0	1	0	2	4	4	2	1	1	2	1	3	4	2	2	2	2	4	5	4	6	4	1	3	2
1326	2	4	1	2	1	1	4	2	0	1	0	2	4	1	2	1	1	4	2	0	1	0	2	4	4	2	1	1	1	1	1	2	4	2	2	2	4	6	6	6	6	2	3	2
1327	2	4	1	2	1	1	4	2	0	1	0	2	4	1	2	1	1	4	2	0	1	0	3	3	4	2	1	1	2	1	3	4	2	2	2	2	2	2	2	2	2	2	3	2
1328	2	4	1	2	1	1	4	2	0	1	0	2	4	1	2	1	1	4	2	0	1	0	2	4	5	3	1	2	1	1	1	4	4	2	2	2	4	5	5	5	5	2	3	2
1329	2	4	1	2	1	1	4	2	0	1	0	2	4	1	2	1	1	4	2	0	1	0	5	2	4	0	0	0	1	1	1	4	4	4	5	2	2	3	3	4	3	2	3	2
1330	2	4	1	2	1	1	4	2	0	1	0	2	4	1	2	1	1	4	2	0	1	0	1	5	5	2	1	1	2	1	1	1	5	4	4	4	5	5	5	5	5	1	3	5
1331	2	4	1	2	1	1	4	2	0	1	0	2	4	1	2	1	1	4	2	0	1	0	2	4	4	2	1	1	-8	-8	-8	4	4	2	4	2	4	5	4	-8	3	1	2	2
1332	2	4	1	2	1	1	4	2	0	1	0	2	4	1	2	1	1	4	2	0	1	0	4	4	4	2	1	1	2	1	1	2	3	2	5	1	3	6	3	7	3	2	3	2
1333	2	4	1	2	1	1	4	2	0	1	0	2	4	1	2	1	1	4	2	0	1	0	2	4	4	2	1	1	1	1	3	4	4	2	4	2	4	4	3	6	4	1	3	2
1334	2	4	1	2	1	1	4	2	0	1	0	2	4	1	2	1	1	4	2	0	1	0	4	4	4	2	1	1	1	1	1	2	4	4	3	2	5	2	1	3	1	3	3	2
1335	2	4	1	2	1	1	4	2	0	1	0	2	4	1	2	1	1	4	2	0	1	0	4	3	5	2	1	1	3	2	3	4	2	2	5	1	4	6	5	7	5	2	3	5
1336	2	4	1	2	1	1	4	2	0	1	0	2	4	1	2	1	1	4	2	0	1	0	2	2	4	2	1	1	2	1	2	2	2	2	2	2	4	4	4	4	4	1	3	4
1337	2	4	1	2	1	1	4	2	0	1	0	2	4	1	2	1	1	4	2	0	1	0	4	2	4	2	1	1	2	2	1	4	4	4	3	2	4	6	4	9	4	1	1	2
1338	2	4	1	2	1	1	4	2	0	1	0	2	4	1	2	1	1	4	2	0	1	0	4	2	4	2	1	1	1	1	1	2	4	4	3	2	2	3	3	4	3	2	1	2
1339	2	4	1	2	1	1	4	2	0	1	0	2	4	1	2	1	1	4	2	0	1	0	2	3	4	97	97	97	2	-8	-8	-8	3	3	3	3	3	2	1	2	1	2	3	4
1340	2	4	1	2	1	1	4	2	0	1	0	2	4	1	2	1	1	4	2	0	1	0	2	4	5	4	1	3	1	1	1	1	2	2	2	2	4	6	6	6	4	1	1	2
1341	2	4	1	2	1	1	4	2	0	1	0	2	4	1	2	1	1	4	2	0	1	0	2	3	5	4	2	2	1	1	3	1	2	3	3	-8	4	4	4	4	4	1	2	2
1342	2	4	1	2	1	1	4	2	0	1	0	2	4	1	2	1	1	4	2	0	1	0	2	4	4	4	3	1	1	1	-8	2	4	2	4	2	4	3	3	4	5	1	3	2
1343	2	4	1	2	1	1	4	2	0	1	0	2	4	1	2	1	1	4	2	0	1	0	5	4	4	2	97	97	2	1	1	4	4	4	4	1	4	5	3	6	3	2	3	1
1344	2	4	1	2	1	1	4	2	0	1	0	2	4	1	2	1	1	4	2	0	1	0	4	2	2	1	97	97	1	1	1	3	2	2	3	2	2	4	5	-8	4	2	3	2
1345	2	4	1	2	1	1	4	2	0	1	0	2	4	1	2	1	1	4	2	0	1	0	3	4	4	1	97	97	2	1	1	3	3	4	3	2	2	5	4	5	3	1	2	2
1346	2	4	1	2	1	1	4	2	0	1	0	2	4	1	2	1	1	4	2	0	1	0	4	4	4	2	1	1	1	1	1	4	2	2	2	3	4	2	1	4	1	2	3	4
1347	2	4	1	2	1	1	3	2	0	1	0	2	4	1	2	1	1	3	2	0	1	0	5	2	4	1	1	0	3	1	2	3	2	3	2	2	4	2	2	4	4	2	2	2
1348	2	4	1	2	1	1	3	2	0	1	0	2	4	1	2	1	1	3	2	0	1	0	3	2	3	3	2	1	2	1	3	1	4	2	3	3	2	4	3	6	3	2	3	2
1349	2	4	1	2	1	1	3	2	0	1	0	2	4	1	2	1	1	3	2	0	1	0	1	4	5	1	1	0	1	1	3	2	2	4	4	2	4	4	3	6	3	2	3	2
1350	2	4	1	2	1	1	3	2	0	1	0	2	4	1	2	1	1	3	2	0	1	0	2	4	3	2	1	1	3	3	1	2	1	1	5	1	5	4	4	4	4	2	3	1
1351	2	4	1	2	1	1	3	2	0	1	0	2	4	1	2	1	1	3	2	0	1	0	4	4	4	2	1	1	1	1	1	4	1	1	1	1	4	4	2	6	1	2	3	4
1352	2	4	1	2	1	1	3	2	0	1	0	2	4	1	2	1	1	3	2	0	1	0	4	4	4	2	1	1	1	1	1	4	2	2	2	2	2	2	1	2	1	2	3	2
1353	2	4	1	2	1	1	3	2	0	1	0	2	4	1	2	1	1	3	2	0	1	0	4	4	5	3	1	2	1	1	1	4	4	4	1	4	5	5	5	5	3	1	3	2
1354	2	4	1	2	1	1	3	2	0	1	0	2	4	1	2	1	1	3	2	0	1	0	4	2	4	2	1	1	1	1	1	4	5	4	2	2	2	4	4	5	4	2	3	5
1355	2	4	1	2	1	1	3	2	0	1	0	2	4	1	2	1	1	3	2	0	1	0	4	4	4	2	1	1	2	1	3	2	4	2	2	2	4	4	3	5	3	1	3	4
1356	2	4	1	2	1	1	3	2	0	1	0	2	4	1	2	1	1	3	2	0	1	0	3	4	5	2	1	1	1	1	1	2	4	4	4	2	4	4	4	6	4	1	3	2
1357	2	4	1	2	1	1	3	2	0	1	0	2	4	1	2	1	1	3	2	0	1	0	3	3	3	2	1	1	2	1	3	4	3	2	4	4	4	5	5	8	5	2	2	3
1358	2	4	1	2	1	1	3	2	0	1	0	2	4	1	2	1	1	3	2	0	1	0	5	1	1	1	1	0	3	3	3	4	2	2	2	1	5	2	2	2	2	2	-8	3
1359	2	4	1	2	1	1	3	2	0	1	0	2	4	1	2	1	1	3	2	0	1	0	4	-8	3	1	1	0	2	2	-8	2	4	4	4	4	4	2	1	3	1	1	3	3
1360	2	4	1	2	1	1	3	2	0	1	0	2	4	1	2	1	1	3	2	0	1	0	3	2	4	1	0	1	2	1	1	2	4	2	2	2	2	2	1	3	1	2	3	2
1361	2	4	1	2	1	1	3	2	0	1	0	2	4	1	2	1	1	3	2	0	1	0	4	4	4	2	1	1	3	1	3	2	3	2	2	2	4	3	3	4	3	1	3	4
1362	2	4	1	2	1	1	3	2	0	1	0	2	4	1	2	1	1	3	2	0	1	0	3	4	4	2	1	1	4	2	5	4	1	1	2	1	5	3	2	4	1	2	3	4
1363	2	4	1	2	1	1	3	2	0	1	0	2	4	1	2	1	1	3	2	0	1	0	4	4	4	2	1	1	2	2	2	2	4	4	4	2	4	5	5	5	5	1	3	2
1364	2	4	1	2	1	1	3	2	0	1	0	2	4	1	2	1	1	3	2	0	1	0	2	4	4	2	0	2	1	1	1	3	2	2	3	3	4	4	3	4	3	2	1	2
1365	2	4	1	2	1	1	3	2	0	1	0	2	4	1	2	1	1	3	2	0	1	0	2	4	5	1	97	97	1	1	1	4	1	1	1	2	5	4	4	4	3	2	1	2
1366	2	4	1	2	1	1	3	2	0	1	0	2	4	1	2	1	1	3	2	0	1	0	3	2	3	2	1	1	2	1	2	2	2	2	3	3	5	3	3	4	2	2	1	2
1367	2	4	1	2	1	1	3	2	0	1	0	2	4	1	2	1	1	3	2	0	1	0	4	4	4	2	1	1	1	1	1	4	1	2	2	2	4	5	3	7	1	1	3	4
1368	2	4	1	2	1	1	3	2	0	1	0	2	4	1	2	1	1	3	2	0	1	0	4	1	4	2	1	1	1	1	1	4	4	4	4	2	4	3	3	5	3	1	3	4
1369	2	4	1	2	1	1	3	2	0	1	0	2	4	1	2	1	1	3	2	0	1	0	3	2	4	2	1	1	1	1	1	2	4	2	2	2	4	3	2	3	2	1	3	2
1370	2	4	1	2	1	1	3	2	0	1	0	2	4	1	2	1	1	3	2	0	1	0	4	4	4	2	1	1	2	1	2	2	4	4	2	3	4	2	2	2	1	1	3	2
1371	2	4	1	2	1	1	3	2	0	1	0	2	4	1	2	1	1	3	2	0	1	0	3	2	3	97	97	97	3	3	3	4	2	2	2	2	5	4	2	5	1	1	3	4
1372	2	4	1	2	1	1	3	2	0	1	0	2	4	1	2	1	1	3	2	0	1	0	4	4	4	2	1	1	3	2	3	2	4	2	4	2	4	4	3	5	3	1	3	2
1373	2	4	1	2	1	1	3	2	0	1	0	2	4	1	2	1	1	3	2	0	1	0	2	4	4	2	1	1	1	1	1	2	4	4	3	2	5	4	2	4	1	1	3	2
1374	2	4	1	2	1	1	3	2	0	1	0	2	4	1	2	1	1	3	2	0	1	0	2	2	4	2	1	1	2	1	3	4	4	2	4	2	4	4	3	6	4	1	3	2
1375	2	4	1	2	1	1	3	2	0	1	0	2	4	1	2	1	1	3	2	0	1	0	4	2	4	2	1	1	1	1	1	4	4	2	4	2	4	3	3	3	2	1	3	5
1376	2	4	1	2	1	1	3	2	0	1	0	2	4	1	2	1	1	3	2	0	1	0	3	2	4	2	1	1	3	3	3	2	2	2	2	2	2	6	4	7	3	2	1	2
1377	2	4	1	2	1	1	3	2	0	1	0	2	4	1	2	1	1	3	2	0	1	0	5	4	4	2	1	1	3	4	3	2	4	4	4	2	4	3	2	6	2	1	3	2
1378	2	4	1	2	1	1	3	2	0	1	0	2	4	1	2	1	1	3	2	0	1	0	4	4	4	2	1	1	1	1	1	4	2	2	4	4	5	2	1	2	1	1	3	4
1379	2	4	1	2	1	1	3	2	0	1	0	2	4	1	2	1	1	3	2	0	1	0	1	2	4	1	0	1	3	4	4	2	2	1	3	1	4	2	3	4	2	2	3	4
1380	2	4	1	2	1	1	3	2	0	1	0	2	4	1	2	1	1	3	2	0	1	0	3	4	4	2	1	1	1	1	1	2	4	2	3	2	4	3	2	2	2	2	3	4
1381	2	4	1	2	1	1	3	2	0	1	0	2	4	1	2	1	1	3	2	0	1	0	2	2	4	2	1	1	1	1	1	2	4	2	4	2	4	6	4	6	2	1	3	4
1382	2	4	1	2	1	1	3	2	0	1	0	2	4	1	2	1	1	3	2	0	1	0	3	3	4	2	1	1	2	1	1	2	4	2	4	2	4	5	4	6	3	1	3	4
1383	2	4	1	2	1	1	3	2	0	1	0	2	4	1	2	1	1	3	2	0	1	0	3	4	4	2	1	1	2	1	4	2	2	2	3	2	5	3	2	3	1	2	1	2
1384	2	4	1	2	1	1	3	2	0	1	0	2	4	1	2	1	1	3	2	0	1	0	2	4	4	2	1	1	2	1	5	4	4	2	4	2	4	4	3	6	3	2	3	4
1385	2	4	1	2	1	1	3	2	0	1	0	2	4	1	2	1	1	3	2	0	1	0	4	4	5	4	2	2	1	1	1	4	4	2	2	2	2	5	6	4	2	1	3	2
1386	2	4	1	2	1	1	3	2	0	1	0	2	4	1	2	1	1	3	2	0	1	0	5	2	4	2	1	1	1	1	1	2	2	1	4	1	4	1	1	1	1	1	3	4
1387	2	4	1	2	1	1	3	2	0	1	0	2	4	1	2	1	1	3	2	0	1	0	5	2	2	2	1	1	1	1	1	2	2	1	4	1	4	1	1	1	1	1	3	4
1388	2	4	1	2	1	1	3	2	0	1	0	2	4	1	2	1	1	3	2	0	1	0	4	2	4	97	97	97	1	1	1	2	2	2	2	2	2	5	4	6	1	1	2	4
1389	2	4	1	2	1	1	3	2	0	1	0	2	4	1	2	1	1	3	2	0	1	0	5	4	4	2	1	1	2	1	3	2	2	1	4	1	4	2	1	5	3	1	3	4
1390	2	4	1	2	1	1	3	2	0	1	0	2	4	1	2	1	1	3	2	0	1	0	4	3	4	2	1	1	1	1	1	2	2	2	4	1	4	3	2	3	2	2	1	2
1391	2	4	1	2	1	1	3	2	0	1	0	2	4	1	2	1	1	3	2	0	1	0	2	1	5	2	1	1	1	1	2	2	4	2	4	2	4	2	1	4	1	1	3	2
1392	2	4	1	2	1	1	3	2	0	1	0	2	4	1	2	1	1	3	2	0	1	0	4	2	4	2	1	1	1	1	1	4	4	2	5	2	4	3	3	5	3	1	3	4
1393	2	4	1	2	1	1	3	2	0	1	0	2	4	1	2	1	1	3	2	0	1	0	2	5	5	2	1	1	1	1	1	2	5	5	1	5	2	5	3	5	1	1	3	2
1394	2	4	1	2	1	1	3	2	0	1	0	2	4	1	2	1	1	3	2	0	1	0	2	4	5	2	1	1	3	1	1	2	4	2	4	1	4	5	4	6	3	1	3	4
1395	2	4	1	2	1	1	3	2	0	1	3	2	4	1	2	1	1	3	2	0	1	3	2	2	4	2	1	1	1	1	1	2	5	5	-8	2	4	2	1	2	1	1	3	1
1396	2	4	1	2	1	1	3	2	0	1	3	2	4	1	2	1	1	3	2	0	1	3	3	1	3	2	1	1	1	1	1	4	4	4	4	2	2	5	3	7	3	1	3	4
1397	2	4	1	2	1	1	3	2	0	1	3	2	4	1	2	1	1	3	2	0	1	3	2	4	4	3	1	2	1	1	1	4	4	2	3	2	3	5	6	5	4	1	3	2
1398	2	4	1	2	1	1	3	2	0	1	3	2	4	1	2	1	1	3	2	0	1	3	4	4	4	2	1	1	3	1	1	4	2	2	2	2	2	2	1	2	1	2	3	4
1399	2	4	1	2	1	1	3	2	0	1	3	2	4	1	2	1	1	3	2	0	1	3	2	2	4	2	1	1	1	1	3	1	5	5	3	2	5	5	3	5	2	1	3	2
1400	2	4	1	2	1	1	3	2	0	1	3	2	4	1	2	1	1	3	2	0	1	3	3	2	4	2	1	1	2	3	3	2	2	2	2	1	5	5	4	7	4	2	3	-8
1401	2	4	1	2	1	1	3	2	0	1	3	2	4	1	2	1	1	3	2	0	1	3	2	4	4	2	1	1	2	1	3	4	4	4	4	4	5	4	3	5	2	2	3	3
1402	2	4	1	2	1	1	3	2	0	1	3	2	4	1	2	1	1	3	2	0	1	3	4	2	4	2	1	1	1	1	3	2	4	2	4	1	4	4	3	5	5	1	3	2
1403	2	4	1	2	1	1	3	2	0	1	3	2	4	1	2	1	1	3	2	0	1	3	1	2	4	2	1	1	1	1	1	2	5	5	5	5	5	5	6	4	5	1	3	1
1404	2	4	1	2	1	1	2	2	0	1	3	2	4	1	2	1	1	2	2	0	1	3	2	4	4	2	1	1	2	1	2	4	2	2	4	2	4	5	4	6	3	1	3	2
1405	2	4	1	2	1	1	2	2	0	1	3	2	4	1	2	1	1	2	2	0	1	3	4	2	4	2	1	1	1	1	1	2	2	2	2	1	4	3	2	3	3	1	3	2
1406	2	4	1	2	1	1	2	2	0	1	3	2	4	1	2	1	1	2	2	0	1	3	4	4	4	2	1	1	2	1	1	4	2	3	3	2	2	2	1	4	1	2	3	4
1407	2	4	1	2	1	1	2	2	0	1	3	2	4	1	2	1	1	2	2	0	1	3	2	2	4	4	2	2	1	1	1	4	4	4	2	2	4	3	3	5	3	1	3	3
1408	2	4	1	2	1	1	2	2	0	1	3	2	4	1	2	1	1	2	2	0	1	3	4	1	4	2	1	1	1	1	1	4	4	3	5	2	4	5	2	8	2	1	3	4
1409	2	4	1	2	1	1	2	2	0	1	3	2	4	1	2	1	1	2	2	0	1	3	4	2	4	2	1	1	2	1	1	2	4	4	4	2	4	5	3	8	2	3	3	4
1410	2	4	1	2	1	1	2	2	0	1	3	2	4	1	2	1	1	2	2	0	1	3	2	2	3	2	97	97	3	4	2	4	2	2	2	1	1	5	4	7	4	1	3	4
1411	2	4	1	2	1	1	2	2	0	1	3	2	4	1	2	1	1	2	2	0	1	3	2	3	4	2	1	1	1	1	1	4	2	2	5	2	5	3	1	4	1	1	3	1
1412	2	4	1	2	1	1	2	2	0	1	3	2	4	1	2	1	1	2	2	0	1	3	2	3	4	2	1	1	1	1	1	2	2	1	2	1	2	5	9	9	8	2	3	3
1413	2	4	1	2	1	1	2	2	0	1	3	2	4	1	2	1	1	2	2	0	1	3	4	2	5	2	1	1	1	1	1	4	2	2	2	2	4	6	2	7	2	1	3	2
1414	2	4	1	2	1	1	2	2	0	1	3	2	4	1	2	1	1	2	2	0	1	3	4	5	5	2	1	1	1	1	1	2	5	2	1	2	2	7	3	9	1	1	3	1
1415	2	4	1	2	1	1	2	2	0	1	3	2	4	1	2	1	1	2	2	0	1	3	5	2	4	4	2	2	1	1	1	1	4	4	5	5	4	3	2	8	1	2	3	2
1416	2	4	1	2	1	1	2	2	0	1	3	2	4	1	2	1	1	2	2	0	1	3	2	3	2	4	2	2	2	1	1	2	4	2	4	3	4	3	2	3	4	2	3	2
1417	2	4	1	2	1	1	2	2	0	1	3	2	4	1	2	1	1	2	2	0	1	3	3	4	5	2	1	1	1	1	1	4	2	1	2	1	5	5	3	8	1	2	3	1
1418	2	4	1	2	1	1	2	2	0	1	3	2	4	1	2	1	1	2	2	0	1	3	2	5	5	2	1	1	1	1	3	2	5	5	5	4	5	10	8	6	1	1	3	2
1419	2	4	1	2	1	1	2	2	0	1	3	2	4	1	2	1	1	2	2	0	1	3	2	1	4	2	1	1	1	2	2	4	4	1	4	1	5	5	1	10	5	1	3	2
1420	2	4	1	2	1	1	2	2	0	1	3	2	4	1	2	1	1	2	2	0	1	3	2	2	5	3	2	1	4	1	1	4	4	2	4	4	4	5	5	6	7	1	3	3
1421	2	4	1	2	1	1	2	2	0	1	3	2	4	1	2	1	1	2	2	0	1	3	4	4	5	2	1	1	4	2	2	2	5	5	3	3	3	6	7	5	4	2	3	4
1422	2	4	1	2	1	1	2	3	1	2	3	2	4	1	2	1	1	2	3	1	2	3	2	1	4	2	1	1	1	1	1	2	4	4	4	4	4	5	3	6	1	2	3	2
1423	2	4	1	2	1	1	2	3	1	2	3	2	4	1	2	1	1	2	3	1	2	3	4	3	4	2	1	1	1	1	1	4	5	4	3	3	5	3	1	2	1	2	3	3
1424	2	4	1	2	1	1	2	3	1	2	3	2	4	1	2	1	1	2	3	1	2	3	2	4	4	2	1	1	2	1	1	2	5	5	4	4	4	3	2	4	2	1	3	2
1425	2	4	1	2	1	1	2	3	1	2	3	2	4	1	2	1	1	2	3	1	2	3	5	3	4	2	1	1	1	1	1	4	4	1	2	1	5	3	1	5	1	3	3	2
1426	2	4	1	2	1	1	2	3	1	2	3	2	4	1	2	1	1	2	3	1	2	3	2	5	4	2	1	1	1	1	1	2	4	4	3	4	5	1	1	5	1	2	3	2
1427	2	4	1	2	1	1	2	3	1	2	3	2	4	1	2	1	1	2	3	1	2	3	4	2	4	2	1	1	4	1	1	2	2	2	4	3	2	5	5	5	5	1	3	4
1428	2	4	1	3	1	1	2	3	1	2	3	2	4	1	3	1	1	2	3	1	2	3	3	2	4	2	1	1	1	1	1	4	5	5	5	2	5	5	1	9	1	1	3	3
1429	2	4	1	3	1	1	2	3	1	2	3	2	4	1	3	1	1	2	3	1	2	3	3	2	4	2	1	1	1	1	1	2	5	2	4	1	4	5	3	5	3	2	1	5
1430	2	4	1	3	1	1	2	3	1	2	3	2	4	1	3	1	1	2	3	1	2	3	4	2	4	4	3	1	1	1	1	4	2	2	2	2	4	4	3	6	1	2	3	2
1431	2	4	1	3	1	1	2	3	1	2	3	2	4	1	3	1	1	2	3	1	2	3	2	4	2	2	1	1	1	1	1	1	4	3	4	4	5	8	5	8	1	2	3	4
1432	2	4	1	3	1	1	2	3	1	2	3	2	4	1	3	1	1	2	3	1	2	3	2	1	5	3	1	2	1	1	1	2	5	5	1	2	4	4	3	5	2	1	3	2
1433	2	4	1	3	1	1	2	3	1	2	3	2	4	1	3	1	1	2	3	1	2	3	2	3	4	2	1	1	2	1	3	4	2	3	1	1	4	1	2	1	1	1	2	3
1434	2	4	1	3	1	1	2	3	1	2	3	2	4	1	3	1	1	2	3	1	2	3	4	4	4	5	2	3	4	2	1	1	4	2	4	2	4	3	3	3	3	2	3	2
1435	2	4	1	3	1	1	2	3	1	2	3	2	4	1	3	1	1	2	3	1	2	3	2	4	5	3	2	1	1	1	1	1	2	5	2	2	5	5	2	1	1	1	3	2
1436	2	4	1	3	1	1	2	3	1	2	3	2	4	1	3	1	1	2	3	1	2	3	4	1	3	2	1	1	5	1	1	1	5	5	5	4	4	5	5	8	3	1	3	1
1437	2	4	1	3	1	1	2	3	1	2	3	2	4	1	3	1	1	2	3	1	2	3	2	2	2	4	1	3	1	3	1	2	2	1	3	1	4	1	3	8	4	2	3	2
1438	2	4	1	3	1	1	2	3	1	2	3	2	4	1	3	1	1	2	3	1	2	3	4	4	4	3	2	1	1	1	1	4	4	2	3	3	5	9	9	9	8	1	3	4
1439	2	4	1	3	1	1	2	3	1	2	3	2	4	1	3	1	1	2	3	1	2	3	4	4	4	2	1	1	4	4	4	2	4	4	4	4	4	6	6	7	5	2	3	4
1440	2	4	1	3	1	1	1	3	1	2	3	2	4	1	3	1	1	1	3	1	2	3	1	4	4	3	1	0	1	1	1	4	5	2	2	2	5	4	3	4	2	1	3	4
1441	2	4	1	3	1	1	1	3	1	2	3	2	4	1	3	1	1	1	3	1	2	3	2	1	2	3	1	2	1	1	1	2	5	4	4	4	5	6	5	1	3	1	3	4
1442	2	4	1	3	1	1	1	4	3	2	3	2	4	1	3	1	1	1	4	3	2	3	4	3	5	2	1	1	3	1	1	4	2	2	1	1	5	5	4	9	4	2	3	2
1443	2	4	1	3	1	1	1	4	3	2	3	2	4	1	3	1	1	1	4	3	2	3	2	1	2	0	0	0	1	1	1	2	2	1	4	2	4	1	1	1	1	1	3	3
1444	2	4	1	3	1	1	1	4	3	2	3	2	4	1	3	1	1	1	4	3	2	3	2	2	5	5	2	3	1	1	1	1	5	5	5	1	5	5	1	5	1	2	3	2
1445	2	4	1	3	1	1	1	4	3	2	3	2	4	1	3	1	1	1	4	3	2	3	2	3	4	2	1	1	2	2	4	2	4	2	4	2	4	4	2	5	2	2	3	2
1446	2	4	1	3	1	1	1	4	3	2	3	2	4	1	3	1	1	1	4	3	2	3	4	2	4	4	2	2	1	1	1	2	4	2	4	2	4	4	3	5	2	2	3	2
1447	2	4	1	3	1	1	1	4	3	2	3	2	4	1	3	1	1	1	4	3	2	3	3	1	1	2	1	1	3	1	3	4	5	4	4	2	2	2	4	6	1	1	3	3
1448	2	4	1	3	1	1	1	4	3	2	3	2	4	1	3	1	1	1	4	3	2	3	2	5	5	1	0	1	3	1	1	2	5	1	1	1	5	1	1	3	1	1	3	2
1449	2	4	1	3	1	1	1	4	3	2	3	2	4	1	3	1	1	1	4	3	2	3	2	3	4	1	1	0	4	1	1	1	2	4	4	1	2	7	7	5	3	2	2	1
1450	2	4	1	3	1	1	1	4	3	2	3	2	4	1	3	1	1	1	4	3	2	3	2	4	5	3	1	2	1	1	1	2	4	4	4	2	4	5	4	4	4	1	3	2
1451	2	4	1	3	1	1	1	4	3	2	3	2	4	1	3	1	1	1	4	3	2	3	5	1	4	2	1	1	3	1	1	1	1	1	5	1	5	1	1	1	1	1	3	1
1452	2	4	1	3	1	1	1	4	3	2	3	2	4	1	3	1	1	1	4	3	2	3	4	3	4	1	1	0	2	1	3	2	4	2	3	1	4	3	3	6	2	1	3	2
1453	2	4	1	3	1	1	1	2	0	1	3	2	4	1	3	1	1	1	2	0	1	3	3	3	4	3	2	1	2	1	3	2	4	2	3	2	2	1	1	1	1	1	3	2
1454	2	4	1	3	1	1	1	2	0	1	3	2	4	1	3	1	1	1	2	0	1	3	2	2	5	2	1	1	1	1	-8	4	2	5	5	-8	4	8	10	8	1	3	1	2
1455	2	4	1	3	1	1	1	2	0	1	3	2	4	1	3	1	1	1	2	0	1	3	2	2	4	3	2	1	1	1	1	4	5	5	5	4	4	2	1	2	1	2	3	2
1456	2	4	1	3	1	1	1	2	0	1	3	2	4	1	3	1	1	1	2	0	1	3	3	4	4	2	1	1	3	1	1	2	1	1	1	1	1	4	8	4	6	1	3	3
1457	2	4	1	3	1	1	1	2	0	1	3	2	4	1	3	1	1	1	2	0	1	3	1	4	5	2	1	1	1	1	2	2	5	4	5	2	4	5	1	1	1	1	3	2
1458	2	4	1	3	1	1	1	2	0	1	3	2	4	1	3	1	1	1	2	0	1	3	1	4	4	1	1	0	4	1	1	2	4	2	2	2	3	4	3	4	3	1	3	2
1459	2	4	1	3	1	1	1	2	0	1	3	2	4	1	3	1	1	1	2	0	1	3	1	2	5	3	2	1	2	1	1	4	4	4	2	2	2	3	2	3	1	1	3	2
1460	2	4	1	3	1	1	1	2	0	1	3	2	4	1	3	1	1	1	2	0	1	3	4	2	2	1	1	0	1	1	1	4	2	2	2	2	2	3	3	4	3	2	3	4
1461	2	4	1	3	1	1	1	2	0	1	3	2	4	1	3	1	1	1	2	0	1	3	4	4	4	2	2	0	2	2	1	2	2	4	2	2	4	4	3	7	2	2	3	4
1462	2	4	1	3	1	1	1	2	0	1	3	2	4	1	3	1	1	1	2	0	1	3	3	4	5	3	2	1	1	1	1	2	4	4	4	4	5	1	5	1	1	2	3	4
1463	2	4	1	3	1	1	1	2	0	1	3	2	4	1	3	1	1	1	2	0	1	3	2	3	4	2	1	1	1	1	1	2	2	2	2	2	2	5	8	8	9	2	3	3
1464	2	4	1	3	1	1	1	2	0	1	3	2	4	1	3	1	1	1	2	0	1	3	2	1	2	2	1	1	3	3	1	2	2	3	4	2	4	3	1	4	1	1	3	2
1465	2	4	1	3	1	1	1	2	0	1	3	2	4	1	3	1	1	1	2	0	1	3	4	4	5	2	1	1	4	1	1	2	1	1	5	1	5	4	2	4	1	1	3	2
1466	2	4	1	3	1	1	1	2	0	1	3	2	4	1	3	1	1	1	2	0	1	3	2	5	4	5	3	2	1	1	1	4	3	2	1	2	5	6	3	7	1	1	3	3
1467	2	4	1	3	1	1	1	2	0	1	3	2	4	1	3	1	1	1	2	0	1	3	5	4	4	2	1	1	1	2	1	1	4	2	4	2	4	4	3	4	2	1	3	2
1468	2	4	1	3	1	1	0	2	0	1	3	2	4	1	3	1	1	0	2	0	1	3	4	4	5	1	0	1	3	1	1	2	2	2	2	2	5	6	3	8	4	2	3	2
1469	2	4	1	3	1	1	0	2	0	1	3	2	4	1	3	1	1	0	2	0	1	3	4	2	4	2	1	1	1	1	1	4	4	2	2	1	5	3	1	2	2	2	3	2
1470	2	4	1	3	1	1	0	2	0	1	3	2	4	1	3	1	1	0	2	0	1	3	4	4	5	2	1	1	1	1	1	2	5	2	1	1	4	3	2	4	1	1	3	4
1471	2	4	1	3	1	1	0	2	0	1	3	2	4	1	3	1	1	0	2	0	1	3	3	4	4	2	1	1	3	1	1	2	4	2	4	2	4	1	1	1	1	2	3	2
1472	2	4	1	3	1	1	0	2	0	1	3	2	4	1	3	1	1	0	2	0	1	3	2	3	5	4	2	2	1	1	1	1	2	2	2	2	4	7	4	7	1	1	3	3
1473	2	4	1	3	1	1	0	2	0	1	3	2	4	1	3	1	1	0	2	0	1	3	2	4	4	3	2	1	4	2	1	4	4	2	4	2	3	5	4	5	2	1	3	2
1474	2	4	1	3	1	1	0	2	0	1	3	2	4	1	3	1	1	0	2	0	1	3	2	2	4	3	2	1	1	1	1	1	4	2	4	2	4	7	6	7	8	1	2	5
1475	2	4	1	3	1	1	0	2	0	1	3	2	4	1	3	1	1	0	2	0	1	3	4	1	4	3	2	1	2	1	3	2	4	4	5	2	5	5	6	6	7	1	3	2
1476	2	4	1	3	1	1	0	2	0	1	3	2	4	1	3	1	1	0	2	0	1	3	4	1	4	2	1	1	1	1	1	2	4	2	2	2	2	6	3	9	2	1	3	2
1477	2	4	1	3	1	1	0	2	0	1	3	2	4	1	3	1	1	0	2	0	1	3	3	4	5	2	1	1	1	1	1	4	2	2	4	2	4	4	3	5	2	2	3	2
1478	2	4	1	3	1	1	0	2	0	1	3	2	4	1	3	1	1	0	2	0	1	3	4	2	2	2	1	1	2	1	1	2	5	1	1	2	4	3	3	3	4	1	3	4
1479	2	4	1	3	1	1	0	2	0	1	3	2	4	1	3	1	1	0	2	0	1	3	1	5	5	2	1	1	1	1	1	3	2	4	4	4	4	6	2	7	5	2	3	3
1480	2	4	1	3	1	1	0	2	0	1	3	2	4	1	3	1	1	0	2	0	1	3	1	2	4	2	1	1	1	1	1	2	2	2	2	2	2	3	2	3	1	1	3	2
1481	2	4	1	3	1	1	0	2	0	1	3	2	4	1	3	1	1	0	2	0	1	3	3	2	3	2	1	1	1	1	1	4	3	3	3	2	3	5	3	9	1	2	3	3
1482	2	4	1	3	1	1	0	2	0	1	3	2	4	1	3	1	1	0	2	0	1	3	3	4	5	2	1	1	1	1	1	2	5	4	5	4	5	10	6	10	1	1	3	1
1483	2	4	1	3	1	1	0	2	0	1	3	2	4	1	3	1	1	0	2	0	1	3	2	2	3	2	1	1	2	1	1	4	4	4	4	4	4	4	4	6	3	1	3	2
1484	2	4	1	3	1	1	0	2	0	1	3	2	4	1	3	1	1	0	2	0	1	3	3	5	5	1	1	0	1	1	1	2	5	4	4	3	5	5	3	8	1	1	3	1
1485	2	4	1	3	1	1	0	2	0	1	3	2	4	1	3	1	1	0	2	0	1	3	2	4	5	2	1	1	5	2	4	1	4	5	2	2	4	5	1	7	1	2	3	4
1486	2	4	1	3	1	1	0	2	0	1	3	2	4	1	3	1	1	0	2	0	1	3	2	4	4	2	2	0	1	2	1	2	4	3	4	2	4	5	7	5	1	1	3	2
1487	2	4	1	3	1	1	0	2	0	1	3	2	4	1	3	1	1	0	2	0	1	3	5	2	4	2	1	1	4	2	1	1	4	4	2	2	4	6	3	7	2	1	3	4
1488	2	4	1	3	1	1	0	2	0	1	3	2	4	1	3	1	1	0	2	0	1	3	3	3	4	4	1	3	3	1	1	1	3	3	3	3	4	10	6	10	2	1	3	1
1489	2	4	1	3	1	1	0	2	0	1	3	2	4	1	3	1	1	0	2	0	1	3	2	4	2	1	1	0	3	4	3	2	3	4	2	3	3	3	5	3	7	3	3	4
1490	2	4	1	3	1	1	0	2	0	1	3	2	4	1	3	1	1	0	2	0	1	3	4	4	4	2	1	1	1	1	5	2	1	1	3	1	5	2	2	2	5	1	3	2
1491	2	4	1	3	1	1	0	2	0	1	3	2	4	1	3	1	1	0	2	0	1	3	4	4	4	4	2	2	1	1	1	4	4	2	2	2	4	4	3	5	3	2	3	2
1492	2	4	1	3	1	1	0	2	0	1	3	2	4	1	3	1	1	0	2	0	1	3	1	5	5	2	0	2	1	2	2	2	5	4	5	1	5	5	1	7	3	2	3	2
1493	2	4	1	3	1	1	0	2	0	1	3	2	4	1	3	1	1	0	2	0	1	3	3	1	5	3	2	1	1	1	1	1	5	5	2	3	2	10	5	10	2	1	3	3
1494	2	4	1	3	1	1	0	2	0	1	3	2	4	1	3	1	1	0	2	0	1	3	2	3	4	5	2	3	2	1	2	2	5	4	3	4	3	7	6	8	6	1	3	2
1495	2	4	1	3	1	1	0	2	0	1	3	2	4	1	3	1	1	0	2	0	1	3	4	2	4	1	1	0	5	1	1	2	4	2	2	2	5	5	3	8	4	1	3	4
1496	2	4	1	3	1	1	0	2	0	1	3	2	4	1	3	1	1	0	2	0	1	3	2	3	4	2	1	1	4	1	1	2	2	2	2	2	4	3	1	3	1	1	3	2
1497	2	4	1	3	1	1	0	2	0	1	3	2	4	1	3	1	1	0	2	0	1	3	2	4	4	3	1	2	3	1	1	1	5	5	4	2	5	4	6	5	1	1	3	1
1498	2	4	1	3	1	1	0	2	0	1	3	2	4	1	3	1	1	0	2	0	1	3	4	2	4	2	1	1	1	1	1	2	5	2	4	1	4	5	6	8	1	1	3	1
1499	2	4	1	3	1	1	0	2	0	1	3	2	4	1	3	1	1	0	2	0	1	3	2	2	1	3	2	1	1	1	1	4	2	4	2	2	5	7	8	5	3	1	3	2
1500	2	4	1	3	1	1	0	2	0	1	3	2	4	1	3	1	1	0	2	0	1	3	4	1	4	2	1	1	1	1	1	2	4	2	4	3	5	5	3	5	3	2	1	4
1501	2	4	1	3	1	1	0	2	0	1	3	2	4	1	3	1	1	0	2	0	1	3	3	5	5	5	3	2	1	1	1	1	4	4	4	2	4	2	1	3	1	2	3	2
1502	2	4	1	3	1	1	0	2	0	1	3	2	4	1	3	1	1	0	2	0	1	3	2	2	5	2	1	1	1	1	1	2	4	2	2	2	5	3	1	4	1	1	3	3
1503	2	4	1	3	1	1	0	2	0	1	3	2	4	1	3	1	1	0	2	0	1	3	2	4	5	2	2	0	1	1	1	4	4	4	4	4	4	5	3	6	2	2	3	2
1504	2	4	1	3	1	1	0	2	0	1	3	2	4	1	3	1	1	0	2	0	1	3	2	5	5	2	1	1	3	1	1	2	5	4	5	4	4	3	1	7	1	1	3	1
1505	2	4	1	3	1	1	0	2	0	1	3	2	4	1	3	1	1	0	2	0	1	3	3	5	5	4	1	3	1	1	1	2	2	2	3	2	2	6	7	4	2	1	3	1
1506	2	4	1	3	1	1	0	2	0	1	3	2	4	1	3	1	1	0	2	0	1	3	4	2	4	2	1	1	1	3	1	1	2	1	2	2	5	5	1	10	2	1	3	2
1507	2	4	1	3	1	1	0	2	0	1	3	2	4	1	3	1	1	0	2	0	1	3	5	2	4	2	2	0	4	1	1	1	4	4	2	2	3	3	2	3	2	1	3	2
1508	2	4	1	3	1	1	0	2	0	1	3	2	4	1	3	1	1	0	2	0	1	3	3	1	4	7	2	5	1	1	1	2	1	1	1	3	1	5	4	9	2	1	3	2
5640	2	1	1	1	1	4	0	5	3	2	3	2	1	1	1	1	4	0	5	3	2	3	3	4	5	2	1	1	1	1	1	2	4	2	4	2	4	5	3	6	4	2	3	1
5641	2	1	1	1	1	4	0	5	3	2	3	2	1	1	1	1	4	0	5	3	2	3	3	2	4	2	1	1	2	3	1	2	1	4	4	4	4	7	6	6	6	1	3	3
5642	2	1	1	1	1	4	0	5	3	2	3	2	1	1	1	1	4	0	5	3	2	3	4	4	4	0	0	0	5	1	3	2	4	4	4	2	4	1	1	1	1	1	3	4
5643	2	1	1	1	1	4	0	5	3	2	3	2	1	1	1	1	4	0	5	3	2	3	2	4	5	3	2	1	1	1	1	4	4	4	4	4	5	2	2	2	2	1	3	2
5644	2	1	1	1	1	4	0	5	3	2	3	2	1	1	1	1	4	0	5	3	2	3	3	4	4	2	1	1	3	1	2	4	1	1	2	1	4	6	5	7	4	1	3	3
5645	2	1	1	1	1	4	0	5	3	2	3	2	1	1	1	1	4	0	5	3	2	3	2	4	4	2	1	1	2	2	3	4	4	3	3	3	3	5	4	6	4	2	1	2
5646	2	1	1	1	1	4	0	5	3	2	3	2	1	1	1	1	4	0	5	3	2	3	4	2	5	2	1	1	1	1	1	4	4	4	4	2	4	6	4	5	1	1	3	4
5647	2	1	1	1	1	4	0	5	3	2	3	2	1	1	1	1	4	0	5	3	2	3	2	2	4	2	1	1	2	2	1	2	4	4	5	4	4	7	6	7	7	1	-8	2
5648	2	1	1	1	1	4	0	5	3	2	3	2	1	1	1	1	4	0	5	3	2	3	4	3	4	3	1	2	1	1	3	4	4	4	3	3	3	5	5	5	4	2	3	2
5649	2	1	1	1	1	4	0	5	3	2	3	2	1	1	1	1	4	0	5	3	2	3	2	2	4	2	1	1	1	1	1	2	5	5	5	2	5	5	4	6	2	1	1	1
5650	2	1	1	1	1	4	0	5	3	2	3	2	1	1	1	1	4	0	5	3	2	3	3	4	4	2	1	1	1	1	3	3	4	3	3	2	4	5	5	6	4	2	2	3
5651	2	1	1	1	1	4	0	5	3	2	3	2	1	1	1	1	4	0	5	3	2	3	4	5	5	2	1	1	1	1	1	2	5	5	5	-8	2	1	1	1	1	1	3	5
5652	2	1	1	1	1	4	0	5	3	2	3	2	1	1	1	1	4	0	5	3	2	3	2	3	3	1	0	1	2	1	1	3	5	5	5	3	4	2	1	2	1	2	3	3
5653	2	1	1	2	0	4	0	5	3	2	3	2	1	1	2	0	4	0	5	3	2	3	4	4	5	2	1	1	1	1	1	2	5	5	4	1	5	5	3	8	3	1	3	2
5654	2	1	1	2	0	4	0	5	3	2	3	2	1	1	2	0	4	0	5	3	2	3	5	4	2	2	1	1	1	1	1	1	3	4	2	1	5	2	5	1	1	1	1	5
5655	2	1	1	2	0	4	0	5	3	3	3	2	1	1	2	0	4	0	5	3	3	3	4	4	3	2	1	1	1	1	1	2	4	4	2	2	2	5	4	5	2	1	3	2
5656	2	1	1	2	0	4	0	5	3	3	3	2	1	1	2	0	4	0	5	3	3	3	4	3	3	1	1	0	1	1	4	4	4	4	4	2	5	4	8	5	5	2	3	3
5657	2	1	1	2	0	4	0	5	3	3	3	2	1	1	2	0	4	0	5	3	3	3	2	4	4	1	1	0	2	1	3	2	3	2	2	2	4	5	3	8	3	2	3	2
5658	2	1	1	2	0	4	0	5	3	3	3	2	1	1	2	0	4	0	5	3	3	3	2	5	5	2	0	2	1	1	1	4	2	5	1	1	5	5	3	5	1	1	3	5
5659	2	1	1	2	0	4	0	5	3	3	3	2	1	1	2	0	4	0	5	3	3	3	2	3	3	2	1	1	1	1	1	2	4	4	4	4	4	4	3	5	3	1	3	3
5660	2	1	1	2	0	4	0	5	3	3	3	2	1	1	2	0	4	0	5	3	3	3	4	4	5	2	1	1	1	1	1	2	2	2	2	2	4	1	1	1	1	1	3	1
5661	2	1	1	2	0	4	0	5	3	3	3	2	1	1	2	0	4	0	5	3	3	3	2	4	4	2	1	1	2	2	2	1	2	2	3	2	3	5	6	5	3	2	3	2
5662	2	1	1	2	0	4	0	5	3	3	3	2	1	1	2	0	4	0	5	3	3	3	3	4	4	2	1	1	2	1	3	4	2	2	3	2	3	6	5	7	5	2	3	2
5663	2	1	1	2	0	4	0	5	3	3	3	2	1	1	2	0	4	0	5	3	3	3	4	4	5	4	2	2	1	1	1	4	4	2	2	2	4	6	5	7	5	1	3	2
5664	2	1	1	2	0	4	0	5	3	3	3	2	1	1	2	0	4	0	5	3	3	3	4	3	3	2	1	1	2	1	3	2	4	2	4	2	4	5	3	7	2	1	3	2
5665	2	1	1	2	0	4	0	5	3	3	3	2	1	1	2	0	4	0	5	3	3	3	3	3	4	2	2	0	3	1	3	4	5	4	2	2	5	5	3	5	4	3	3	1
5666	2	1	1	2	0	4	0	5	3	3	3	2	1	1	2	0	4	0	5	3	3	3	2	4	4	3	1	2	2	2	3	4	4	4	1	2	4	6	5	6	5	1	3	2
5667	2	1	1	2	0	4	0	5	3	3	3	2	1	1	2	0	4	0	5	3	3	3	3	3	4	2	1	1	3	1	1	4	4	4	4	2	4	5	4	7	2	3	3	3
5668	2	1	1	2	0	4	0	5	3	3	3	2	1	1	2	0	4	0	5	3	3	3	2	3	3	2	1	1	1	1	1	2	2	2	4	2	5	3	3	3	2	1	3	3
5669	2	1	1	2	0	4	0	5	3	3	3	2	1	1	2	0	4	0	5	3	3	3	2	3	4	2	1	1	1	1	1	2	3	2	2	2	2	4	4	4	3	1	3	2
5670	2	1	1	2	0	4	0	5	3	3	3	2	1	1	2	0	4	0	5	3	3	3	4	4	5	2	1	1	2	1	1	2	4	2	3	1	3	5	3	6	3	1	3	2
5671	2	1	1	2	0	4	0	5	3	3	3	2	1	1	2	0	4	0	5	3	3	3	3	4	4	2	1	1	1	1	1	2	4	2	4	2	3	5	5	-8	5	1	2	4
5672	2	1	1	2	0	4	0	5	3	3	3	2	1	1	2	0	4	0	5	3	3	3	2	4	4	1	1	0	1	1	1	4	4	4	2	2	4	6	2	8	3	2	3	4
5673	2	1	1	2	0	4	0	5	3	3	3	2	1	1	2	0	4	0	5	3	3	3	2	4	4	1	1	0	1	1	1	2	4	4	2	2	5	5	4	6	4	1	3	1
5674	2	1	1	2	0	4	0	5	3	3	3	2	1	1	2	0	4	0	5	3	3	3	4	4	5	2	1	1	3	1	1	2	4	5	4	3	4	1	1	4	1	2	3	2
5675	2	1	1	2	0	4	0	5	3	3	3	2	1	1	2	0	4	0	5	3	3	3	4	4	4	2	1	1	3	3	3	4	4	4	3	3	4	6	5	7	4	1	3	4
5676	2	1	1	2	0	4	0	5	3	3	3	2	1	1	2	0	4	0	5	3	3	3	2	3	4	3	1	2	1	1	1	3	5	4	4	3	1	4	3	4	1	1	2	1
5677	2	1	1	2	0	4	0	5	3	3	3	2	1	1	2	0	4	0	5	3	3	3	4	4	5	2	1	1	3	3	3	4	3	3	3	3	4	5	4	6	4	2	3	2
5678	2	1	1	2	0	4	0	5	3	3	3	2	1	1	2	0	4	0	5	3	3	3	4	3	3	3	2	1	2	1	1	2	4	2	3	2	3	6	4	8	4	2	3	4
5679	2	1	1	2	0	4	0	5	3	3	3	2	1	1	2	0	4	0	5	3	3	3	3	4	4	2	1	1	1	1	3	3	4	3	4	4	4	5	4	5	2	3	3	2
5680	2	1	1	2	0	4	0	5	3	3	3	2	1	1	2	0	4	0	5	3	3	3	4	3	4	2	1	1	1	1	1	2	4	4	3	3	5	5	2	4	1	2	2	2
5681	2	1	1	2	0	4	0	5	3	3	3	2	1	1	2	0	4	0	5	3	3	3	3	4	5	2	1	1	1	1	1	4	4	4	3	2	3	6	5	6	5	2	3	4
5682	2	1	1	2	0	4	0	5	3	3	3	2	1	1	2	0	4	0	5	3	3	3	2	4	4	2	1	1	1	1	1	2	2	2	1	1	4	4	4	7	4	2	3	3
5683	2	1	1	2	0	4	0	5	3	3	3	2	1	1	2	0	4	0	5	3	3	3	2	2	4	2	1	1	2	2	2	4	2	2	2	2	2	6	5	7	4	1	3	3
5684	2	1	1	2	0	4	0	5	3	3	3	2	1	1	2	0	4	0	5	3	3	3	2	4	5	3	2	1	2	1	1	3	4	3	3	2	3	5	5	7	2	1	3	1
5685	2	1	1	2	0	4	0	5	3	3	3	2	1	1	2	0	4	0	5	3	3	3	3	4	3	2	1	1	3	1	1	4	4	4	4	2	4	5	3	7	3	1	3	4
5686	2	1	1	2	0	4	0	5	3	3	3	2	1	1	2	0	4	0	5	3	3	3	2	4	4	3	2	1	4	4	5	1	2	1	2	1	1	5	5	8	5	2	3	4
5687	2	1	1	2	0	4	0	5	3	3	3	2	1	1	2	0	4	0	5	3	3	3	3	3	4	2	1	1	4	4	4	1	2	4	4	4	3	5	3	6	5	2	1	4
5688	2	1	1	2	0	4	0	5	3	3	3	2	1	1	2	0	4	0	5	3	3	3	3	3	4	0	0	0	4	1	4	4	2	2	3	1	5	4	3	6	3	2	3	4
5689	2	1	1	2	0	4	0	5	3	3	3	2	1	1	2	0	4	0	5	3	3	3	2	4	4	2	1	1	3	1	3	2	2	2	2	2	4	7	6	7	5	1	3	2
5690	2	1	1	2	0	4	0	5	3	3	3	2	1	1	2	0	4	0	5	3	3	3	3	4	4	1	0	1	2	3	3	2	2	2	2	2	2	5	6	6	5	1	3	4
5691	2	1	1	2	0	4	0	5	3	3	3	2	1	1	2	0	4	0	5	3	3	3	4	2	4	1	1	0	2	1	3	4	3	3	3	3	4	3	1	5	1	3	2	4
5692	2	1	1	2	0	4	0	5	3	3	3	2	1	1	2	0	4	0	5	3	3	3	4	1	4	0	0	0	1	1	1	4	4	4	5	1	5	1	1	3	1	1	3	4
5693	2	1	1	2	0	4	0	5	3	3	3	2	1	1	2	0	4	0	5	3	3	3	4	3	3	1	1	0	3	1	1	4	4	4	2	1	4	5	4	5	2	1	3	2
5694	2	1	1	2	0	4	0	5	3	3	3	2	1	1	2	0	4	0	5	3	3	3	2	2	5	2	1	1	1	1	1	4	4	4	3	4	3	5	5	5	5	2	3	1
5695	2	1	1	2	0	4	0	5	3	2	3	2	1	1	2	0	4	0	5	3	2	3	2	4	4	2	1	1	2	2	1	2	2	2	2	1	4	6	6	7	6	2	3	2
5696	2	1	1	2	0	4	0	5	3	2	3	2	1	1	2	0	4	0	5	3	2	3	1	1	4	1	1	0	3	1	3	4	2	2	4	1	4	6	6	10	1	1	3	2
5697	2	1	1	2	0	4	0	5	3	2	3	2	1	1	2	0	4	0	5	3	2	3	4	2	4	2	1	1	2	2	2	2	2	2	2	1	4	4	2	5	1	1	3	5
5698	2	1	1	2	0	4	0	5	3	2	3	2	1	1	2	0	4	0	5	3	2	3	2	4	4	4	2	2	1	1	1	2	4	4	4	4	3	6	3	10	3	2	3	2
5699	2	1	1	2	0	4	0	5	3	2	3	2	1	1	2	0	4	0	5	3	2	3	2	4	4	2	1	1	2	1	3	4	4	4	4	1	4	2	2	3	2	2	3	2
5700	2	1	1	2	0	4	0	5	3	2	3	2	1	1	2	0	4	0	5	3	2	3	4	3	5	2	1	1	2	1	2	2	4	2	3	3	5	5	4	6	5	2	2	4
5701	2	1	1	2	0	4	0	5	3	2	3	2	1	1	2	0	4	0	5	3	2	3	2	4	4	2	1	1	2	1	1	4	2	1	1	2	5	5	3	7	3	2	3	2
5702	2	1	1	2	0	4	0	5	3	2	3	2	1	1	2	0	4	0	5	3	2	3	1	4	4	3	1	2	1	1	1	2	4	5	5	2	4	2	3	3	3	3	3	3
5703	2	1	1	2	0	4	0	5	3	2	3	2	1	1	2	0	4	0	5	3	2	3	3	4	4	3	1	2	3	1	1	4	4	4	2	2	3	5	3	7	3	2	3	2
5704	2	1	1	2	0	4	0	5	3	2	3	2	1	1	2	0	4	0	5	3	2	3	4	3	4	2	1	1	1	1	1	2	2	4	3	1	2	2	3	1	3	2	3	3
5705	2	1	1	2	0	4	0	5	3	2	3	2	1	1	2	0	4	0	5	3	2	3	2	4	5	2	1	1	1	1	1	4	4	4	4	4	4	5	4	5	3	1	3	2
5706	2	1	1	2	0	4	0	5	3	2	3	2	1	1	2	0	4	0	5	3	2	3	2	3	4	1	1	0	3	1	5	4	3	3	2	2	4	4	3	5	2	2	3	3
5707	2	1	1	2	0	4	0	5	3	2	3	2	1	1	2	0	4	0	5	3	2	3	5	1	1	2	1	1	1	1	1	2	4	1	4	3	5	1	5	1	1	2	3	5
5708	2	1	1	2	0	4	0	5	3	2	3	2	1	1	2	0	4	0	5	3	2	3	2	5	5	2	1	1	2	1	1	2	5	5	5	5	5	6	6	6	6	1	3	5
5709	2	1	1	3	0	4	0	4	3	2	3	2	1	1	3	0	4	0	4	3	2	3	1	5	5	10	5	5	5	1	4	4	5	5	5	1	1	1	1	4	1	2	3	5
5710	2	1	1	3	0	4	0	4	3	2	3	2	1	1	3	0	4	0	4	3	2	3	2	3	4	2	1	1	1	1	1	2	5	5	1	2	5	5	3	7	5	2	3	4
5711	2	1	1	3	0	4	0	4	3	2	3	2	1	1	3	0	4	0	4	3	2	3	2	3	4	2	1	1	2	1	1	2	5	1	1	1	5	3	3	5	3	1	3	2
5712	2	1	1	3	0	4	0	4	3	2	3	2	1	1	3	0	4	0	4	3	2	3	4	4	4	2	1	1	1	1	1	4	4	2	2	2	4	5	4	5	3	1	3	4
5713	2	1	1	3	0	4	0	4	3	2	3	2	1	1	3	0	4	0	4	3	2	3	4	4	3	1	1	0	2	2	2	2	4	4	4	4	4	5	3	3	2	2	3	2
5714	2	1	1	3	0	4	0	4	3	2	3	2	1	1	3	0	4	0	4	3	2	3	4	4	4	2	1	1	1	1	1	2	4	4	4	2	5	6	5	8	3	2	3	2
5715	2	1	1	3	0	4	0	4	3	2	3	2	1	1	3	0	4	0	4	3	2	3	3	2	4	1	1	0	2	1	1	4	2	3	2	3	3	4	3	4	2	2	3	2
5716	2	1	1	3	0	4	0	4	3	2	3	2	1	1	3	0	4	0	4	3	2	3	2	2	4	1	1	0	1	2	1	2	3	2	2	3	2	5	6	6	7	2	3	2
5717	2	1	1	3	0	4	1	4	3	2	3	2	1	1	3	0	4	1	4	3	2	3	3	2	4	2	1	1	1	1	1	1	4	4	3	3	3	3	3	3	2	1	3	4
5718	2	1	1	3	0	4	1	4	3	2	3	2	1	1	3	0	4	1	4	3	2	3	2	4	4	2	1	1	4	4	3	1	2	2	2	2	3	6	6	6	4	2	3	4
5719	2	1	1	3	0	4	1	4	3	2	3	2	1	1	3	0	4	1	4	3	2	3	4	1	4	1	1	0	1	1	1	4	2	2	2	2	4	8	5	8	5	3	3	2
5720	2	1	1	3	0	4	1	4	3	2	3	2	1	1	3	0	4	1	4	3	2	3	3	4	5	2	1	1	3	1	2	4	3	2	3	1	4	7	6	8	5	1	3	3
5721	2	1	1	3	0	4	1	4	3	2	3	2	1	1	3	0	4	1	4	3	2	3	2	4	5	2	1	1	1	1	1	4	4	4	4	4	4	4	2	4	1	1	3	2
5722	2	1	1	3	0	4	1	4	3	2	3	2	1	1	3	0	4	1	4	3	2	3	2	4	5	2	1	1	2	1	1	4	2	2	2	1	4	5	5	5	5	3	2	2
5723	2	1	1	3	0	4	1	4	3	2	3	2	1	1	3	0	4	1	4	3	2	3	5	4	4	4	2	2	4	1	1	1	5	5	5	5	5	5	4	7	4	1	3	4
5724	2	1	1	3	0	4	1	4	3	2	3	2	1	1	3	0	4	1	4	3	2	3	2	2	4	2	1	1	1	1	1	4	4	4	4	2	4	5	5	7	5	2	3	2
5725	2	1	1	3	0	4	1	4	3	2	3	2	1	1	3	0	4	1	4	3	2	3	3	2	5	2	1	1	3	1	1	2	5	5	1	4	5	5	5	9	2	2	3	3
5726	2	1	1	3	0	4	1	4	3	2	3	2	1	1	3	0	4	1	4	3	2	3	4	4	4	1	0	1	2	1	2	4	4	4	5	4	4	3	2	6	1	1	3	4
5727	2	1	1	3	0	4	1	4	3	2	3	2	1	1	3	0	4	1	4	3	2	3	2	4	5	4	2	2	3	2	1	2	4	3	4	2	3	5	3	6	2	1	3	2
5728	2	1	1	3	0	4	1	4	3	2	3	2	1	1	3	0	4	1	4	3	2	3	4	4	4	2	1	1	4	4	3	4	4	3	4	3	4	4	5	6	3	1	1	2
5729	2	1	1	3	0	4	1	4	3	2	3	2	1	1	3	0	4	1	4	3	2	3	2	4	4	2	1	1	1	1	3	4	4	4	3	1	2	4	4	4	3	1	3	4
5730	2	1	1	3	0	4	1	4	3	2	3	2	1	1	3	0	4	1	4	3	2	3	2	2	2	2	1	1	2	2	2	2	2	3	3	2	2	4	3	5	3	2	3	2
5731	2	1	1	3	0	4	1	4	3	2	3	2	1	1	3	0	4	1	4	3	2	3	4	4	4	2	1	1	1	1	1	3	4	4	3	4	4	4	3	6	2	2	3	2
5732	2	1	1	3	0	4	1	4	3	2	3	2	1	1	3	0	4	1	4	3	2	3	4	4	4	2	1	1	1	1	1	2	3	2	2	2	2	5	8	3	8	1	3	3
5733	2	1	1	3	1	4	1	4	3	2	3	2	1	1	3	1	4	1	4	3	2	3	1	3	4	2	1	1	5	1	1	2	2	1	1	1	4	8	10	9	-8	1	1	5
5734	2	1	1	3	1	4	1	4	3	2	3	2	1	1	3	1	4	1	4	3	2	3	3	3	5	2	1	1	3	1	-8	4	3	2	2	1	5	4	2	5	2	3	3	2
5735	2	1	1	3	1	4	1	4	3	2	3	2	1	1	3	1	4	1	4	3	2	3	3	4	4	2	1	1	3	1	1	4	2	1	3	2	4	7	7	9	6	1	3	2
5736	2	1	1	3	1	4	1	4	3	2	3	2	1	1	3	1	4	1	4	3	2	3	4	4	4	4	2	2	4	4	4	4	2	2	2	2	5	4	4	6	5	3	3	4
5737	2	1	1	3	1	4	1	4	3	2	3	2	1	1	3	1	4	1	4	3	2	3	3	4	4	2	1	1	1	1	3	4	4	3	3	3	3	2	4	2	3	2	3	3
5738	2	1	1	3	1	4	1	4	3	2	3	2	1	1	3	1	4	1	4	3	2	3	2	4	4	3	1	2	1	1	1	2	4	4	4	2	4	4	3	5	3	2	3	2
5739	2	1	1	3	1	4	1	4	3	2	3	2	1	1	3	1	4	1	4	3	2	3	3	3	4	2	0	2	1	1	1	4	2	2	2	3	3	4	3	4	2	1	3	2
5740	2	1	1	3	1	4	1	4	3	2	3	2	1	1	3	1	4	1	4	3	2	3	2	4	4	2	1	1	1	1	1	4	4	4	4	4	2	4	3	4	3	2	3	1
5741	2	1	1	3	1	4	1	4	3	2	3	2	1	1	3	1	4	1	4	3	2	3	2	5	5	5	3	2	3	1	1	4	5	5	5	2	2	5	5	5	3	1	3	5
5742	2	1	1	3	1	4	1	4	3	2	3	2	1	1	3	1	4	1	4	3	2	3	4	4	4	2	1	1	3	1	3	4	4	4	2	2	4	5	3	9	2	2	3	5
5743	2	1	1	3	1	4	1	4	3	2	3	2	1	1	3	1	4	1	4	3	2	3	1	3	3	2	1	1	1	1	1	2	1	1	1	1	5	3	3	3	4	1	3	4
5744	2	1	1	3	1	4	1	4	3	2	3	2	1	1	3	1	4	1	4	3	2	3	4	2	2	0	0	0	3	1	3	1	5	5	5	4	4	2	2	3	2	2	3	2
5745	2	1	1	3	1	4	1	4	3	2	3	2	1	1	3	1	4	1	4	3	2	3	3	4	4	1	0	1	3	3	3	4	2	2	3	2	4	5	4	6	4	2	3	3
5746	2	1	1	3	1	4	1	4	3	2	3	2	1	1	3	1	4	1	4	3	2	3	2	2	3	2	1	1	2	2	2	2	4	4	3	4	4	10	9	9	9	1	3	2
5747	2	1	1	3	1	4	1	4	3	2	3	2	1	1	3	1	4	1	4	3	2	3	3	3	4	0	0	0	1	1	3	4	3	3	3	3	3	2	2	3	2	1	3	3
5748	2	1	1	3	1	4	1	4	3	2	3	2	1	1	3	1	4	1	4	3	2	3	3	2	4	2	0	2	4	1	3	2	4	5	4	2	4	7	7	8	6	2	3	4
5749	2	1	1	3	1	4	1	4	3	2	3	2	1	1	3	1	4	1	4	3	2	3	2	4	4	4	2	2	1	1	1	2	4	4	4	2	3	5	4	5	3	1	3	2
5750	2	1	1	3	1	4	1	4	3	2	3	2	1	1	3	1	4	1	4	3	2	3	2	3	4	2	1	1	3	1	1	4	5	5	5	2	5	5	3	6	2	2	3	2
5751	2	1	1	3	1	4	1	4	3	2	3	2	1	1	3	1	4	1	4	3	2	3	3	2	3	2	1	1	3	1	2	4	4	4	3	2	2	4	2	5	2	3	3	2
5752	2	1	1	3	1	4	1	4	3	2	3	2	1	1	3	1	4	1	4	3	2	3	4	4	4	2	1	1	3	1	2	2	4	4	4	4	1	7	6	8	7	1	3	4
5753	2	1	1	3	1	4	1	4	3	2	3	2	1	1	3	1	4	1	4	3	2	3	3	4	4	2	2	0	3	2	2	4	4	4	3	2	3	5	4	6	6	2	2	3
5754	2	1	1	3	1	4	1	4	3	2	3	2	1	1	3	1	4	1	4	3	2	3	2	3	5	1	0	1	5	1	4	4	1	1	2	1	5	6	6	7	6	2	3	2
5755	2	1	1	3	1	4	1	4	3	2	3	2	1	1	3	1	4	1	4	3	2	3	2	3	4	2	1	1	1	1	1	4	2	2	3	2	5	5	6	6	7	2	2	4
5756	2	1	1	3	1	4	1	4	3	2	3	2	1	1	3	1	4	1	4	3	2	3	2	4	5	4	2	2	1	1	1	2	4	4	3	1	5	5	5	5	2	2	3	4
5757	2	1	1	3	1	4	1	4	3	2	3	2	1	1	3	1	4	1	4	3	2	3	2	4	4	2	1	1	3	1	1	4	4	4	4	2	2	7	7	5	7	3	3	3
5758	2	1	1	3	1	4	1	4	3	2	3	2	1	1	3	1	4	1	4	3	2	3	4	4	4	2	1	1	2	1	1	2	2	2	2	2	4	3	3	3	1	2	1	4
5759	2	1	1	3	1	4	1	4	3	2	3	2	1	1	3	1	4	1	4	3	2	3	1	3	4	2	1	1	1	1	1	4	4	2	2	4	3	3	2	4	2	1	-8	2
5760	2	1	1	3	1	4	1	4	3	2	3	2	1	1	3	1	4	1	4	3	2	3	4	3	4	1	1	0	2	1	1	2	4	2	2	2	4	5	3	7	3	2	3	4
5761	2	1	1	3	0	4	1	4	3	2	3	2	1	1	3	0	4	1	4	3	2	3	3	2	4	2	1	1	2	1	1	2	2	2	2	2	3	3	2	3	1	1	3	4
5762	2	1	1	3	0	4	1	4	3	2	3	2	1	1	3	0	4	1	4	3	2	3	4	3	4	2	1	1	2	1	1	2	4	4	4	2	4	4	5	5	2	1	3	5
5763	2	1	1	3	0	4	1	4	3	2	3	2	1	1	3	0	4	1	4	3	2	3	4	2	3	1	97	97	1	1	1	3	3	4	4	3	3	5	5	5	-8	1	3	2
5764	2	1	1	3	0	4	1	4	3	2	3	2	1	1	3	0	4	1	4	3	2	3	3	4	4	1	0	1	1	1	1	1	2	2	2	2	4	4	3	5	3	2	2	2
5765	2	1	1	3	0	4	1	4	3	2	3	2	1	1	3	0	4	1	4	3	2	3	2	4	4	2	1	1	1	1	1	4	4	2	4	2	4	5	5	6	4	1	3	4
5766	2	1	1	3	0	4	1	4	3	2	3	2	1	1	3	0	4	1	4	3	2	3	3	3	4	2	1	1	1	1	1	2	4	4	4	3	4	3	2	5	1	1	3	3
5767	2	1	1	3	0	4	1	4	3	2	3	2	1	1	3	0	4	1	4	3	2	3	2	4	4	2	1	1	2	1	1	2	4	4	2	2	2	5	4	5	3	1	3	2
5768	2	1	1	3	0	4	1	4	3	2	3	2	1	1	3	0	4	1	4	3	2	3	2	4	4	2	1	1	3	3	3	1	4	2	3	2	4	5	3	7	3	1	3	3
5769	2	1	1	3	0	4	1	4	3	2	3	2	1	1	3	0	4	1	4	3	2	3	4	4	4	2	1	1	2	3	2	2	4	4	3	4	4	5	4	6	3	2	2	4
5770	2	1	1	3	0	4	1	4	3	2	3	2	1	1	3	0	4	1	4	3	2	3	3	4	4	2	1	1	1	1	1	4	2	2	4	2	5	4	5	5	3	1	3	2
5771	2	1	1	3	0	4	1	4	3	2	3	2	1	1	3	0	4	1	4	3	2	3	2	4	5	2	1	1	3	1	4	4	2	2	2	2	4	6	5	8	5	2	1	4
5772	2	1	1	3	0	4	1	4	3	2	3	2	1	1	3	0	4	1	4	3	2	3	4	2	4	0	0	0	1	1	1	4	4	4	2	2	3	5	5	6	5	2	3	4
5773	2	1	1	3	0	4	1	4	3	2	3	2	1	1	3	0	4	1	4	3	2	3	4	4	4	2	1	1	1	1	1	1	4	4	4	4	4	2	2	3	2	2	3	2
5774	2	1	1	3	0	4	1	4	3	2	3	2	1	1	3	0	4	1	4	3	2	3	3	3	4	1	1	0	3	1	1	4	4	-8	3	2	3	5	3	6	3	1	3	2
5775	2	1	1	3	0	4	1	4	3	2	3	2	1	1	3	0	4	1	4	3	2	3	4	4	5	2	1	1	2	2	3	2	2	1	2	2	4	5	4	7	3	2	1	4
5776	2	1	1	3	0	4	1	4	3	2	3	2	1	1	3	0	4	1	4	3	2	3	4	4	5	2	1	1	1	1	1	4	4	3	3	2	3	7	6	8	5	2	3	4
5777	2	1	1	3	0	3	1	4	3	2	3	2	1	1	3	0	3	1	4	3	2	3	4	2	4	3	1	2	2	2	2	2	2	2	3	2	4	4	3	5	2	2	3	4
5778	2	1	1	3	0	3	1	4	3	2	3	2	1	1	3	0	3	1	4	3	2	3	4	2	4	2	1	1	3	1	1	4	4	2	4	2	2	5	4	8	4	2	3	4
5779	2	1	1	3	0	3	1	4	3	2	3	2	1	1	3	0	3	1	4	3	2	3	2	4	4	2	1	1	3	1	1	2	5	3	1	1	4	7	7	9	7	2	3	2
5780	2	1	1	3	0	3	1	3	1	1	3	2	1	1	3	0	3	1	3	1	1	3	4	3	4	2	1	1	3	3	1	4	3	3	3	2	5	5	5	5	5	1	1	5
5781	2	1	1	3	0	3	1	3	1	1	3	2	1	1	3	0	3	1	3	1	1	3	4	4	5	3	2	1	1	2	1	2	2	2	2	2	4	5	4	6	4	1	3	2
5782	2	1	1	3	0	3	1	3	1	1	3	2	1	1	3	0	3	1	3	1	1	3	2	5	4	2	0	2	4	1	1	4	4	2	2	2	5	8	6	9	5	1	3	2
5783	2	1	1	3	0	3	1	3	1	1	3	2	1	1	3	0	3	1	3	1	1	3	4	3	5	2	1	1	1	1	1	4	1	1	2	4	3	5	5	6	2	2	3	3
5784	2	1	1	3	0	3	1	3	1	1	3	2	1	1	3	0	3	1	3	1	1	3	3	4	4	2	1	1	1	1	3	4	4	4	3	1	5	5	4	6	3	2	3	4
5785	2	1	1	3	0	3	1	3	1	1	3	2	1	1	3	0	3	1	3	1	1	3	3	2	2	2	1	1	2	1	2	2	2	2	2	2	4	4	3	5	2	2	3	2
5786	2	1	1	3	0	3	1	3	1	1	3	2	1	1	3	0	3	1	3	1	1	3	4	4	4	2	1	1	1	1	1	4	4	4	4	3	4	5	5	7	4	1	3	2
5787	2	1	1	3	0	3	1	3	1	1	3	2	1	1	3	0	3	1	3	1	1	3	3	4	5	3	1	2	1	1	1	4	2	4	4	1	3	4	4	4	2	1	2	2
5788	2	1	1	3	0	3	1	3	1	1	3	2	1	1	3	0	3	1	3	1	1	3	3	4	4	2	1	1	4	3	4	4	2	2	4	2	5	5	5	6	5	2	3	2
5789	2	1	1	3	0	3	1	3	1	1	3	2	1	1	3	0	3	1	3	1	1	3	2	1	3	2	1	1	5	1	1	2	5	3	4	2	3	4	3	6	3	2	3	1
5790	2	1	1	3	0	3	1	3	1	1	3	2	1	1	3	0	3	1	3	1	1	3	4	3	4	2	1	1	1	1	1	2	4	4	4	2	4	6	3	8	6	1	3	3
5791	2	1	1	3	0	3	1	3	1	1	3	2	1	1	3	0	3	1	3	1	1	3	2	4	4	2	1	1	1	1	1	4	4	4	2	3	4	5	3	6	2	1	3	2
5792	2	1	1	3	0	3	1	3	1	1	3	2	1	1	3	0	3	1	3	1	1	3	4	4	4	2	0	2	3	1	4	4	1	1	2	1	5	5	2	7	3	2	1	2
5793	2	1	1	3	0	3	1	3	1	1	3	2	1	1	3	0	3	1	3	1	1	3	2	4	4	2	1	1	4	1	1	4	4	2	2	1	5	5	5	5	4	2	3	2
5794	2	1	1	3	0	3	1	3	1	1	3	2	1	1	3	0	3	1	3	1	1	3	5	2	5	2	1	1	1	1	1	2	5	5	2	1	1	10	5	4	3	2	3	3
5795	2	1	1	3	0	3	1	3	1	1	3	2	1	1	3	0	3	1	3	1	1	3	4	2	4	2	1	1	3	1	1	4	3	3	3	2	4	5	5	6	5	2	1	4
5796	2	1	1	3	0	3	1	3	1	1	3	2	1	1	3	0	3	1	3	1	1	3	3	4	3	2	1	1	1	1	1	2	4	4	3	4	1	4	3	6	3	1	3	3
5797	2	1	1	3	0	3	1	3	1	1	3	2	1	1	3	0	3	1	3	1	1	3	2	2	5	2	1	1	3	1	1	2	4	2	2	2	2	5	1	6	1	1	3	4
5798	2	1	1	3	0	3	1	3	1	1	3	2	1	1	3	0	3	1	3	1	1	3	1	5	5	2	1	1	3	1	1	4	4	4	5	2	5	6	5	7	6	2	3	4
5799	2	1	1	3	0	3	1	3	1	1	3	2	1	1	3	0	3	1	3	1	1	3	2	4	5	2	1	1	2	1	3	4	3	2	4	2	3	5	3	7	2	1	3	2
5800	2	1	1	3	0	3	1	3	1	1	3	2	1	1	3	0	3	1	3	1	1	3	2	4	4	2	1	1	2	1	3	1	2	1	4	1	4	5	5	5	5	2	1	4
5801	2	1	1	3	0	3	1	3	1	1	3	2	1	1	3	0	3	1	3	1	1	3	3	3	4	2	1	1	2	2	3	4	3	2	2	2	5	7	6	8	5	1	3	4
5802	2	1	1	3	0	3	1	3	1	1	3	2	1	1	3	0	3	1	3	1	1	3	2	2	4	2	1	1	2	2	1	2	2	3	3	5	5	6	6	5	9	2	3	4
5803	2	1	1	3	0	3	1	3	1	1	3	2	1	1	3	0	3	1	3	1	1	3	4	2	4	1	0	1	3	1	1	4	3	4	4	2	4	3	2	4	2	2	3	1
5804	2	1	1	3	0	3	1	3	1	1	3	2	1	1	3	0	3	1	3	1	1	3	3	3	5	2	1	1	4	2	3	4	4	5	4	2	4	6	5	7	5	2	3	4
5805	2	1	1	3	0	3	1	3	1	1	3	2	1	1	3	0	3	1	3	1	1	3	2	4	5	2	1	1	1	1	1	2	4	4	4	2	5	5	4	6	3	1	3	2
5806	2	1	1	3	0	3	1	3	1	1	3	2	1	1	3	0	3	1	3	1	1	3	4	1	2	2	1	1	1	1	1	1	5	2	1	1	3	2	1	1	1	1	3	3
5807	2	1	1	3	0	3	1	3	1	1	3	2	1	1	3	0	3	1	3	1	1	3	3	4	5	2	2	0	1	1	1	4	3	4	3	2	4	7	6	8	5	2	3	1
5808	2	1	1	3	0	3	1	3	1	1	3	2	1	1	3	0	3	1	3	1	1	3	4	2	4	2	1	1	3	1	1	4	4	4	4	2	3	4	2	6	2	2	3	4
5809	2	1	1	3	0	3	1	3	1	1	3	2	1	1	3	0	3	1	3	1	1	3	2	4	4	2	1	1	4	1	3	4	2	2	2	2	5	6	4	6	4	2	3	2
5810	2	1	1	3	0	3	1	3	1	1	3	2	1	1	3	0	3	1	3	1	1	3	3	4	3	4	2	2	3	1	3	4	4	4	5	2	5	5	3	6	2	1	3	4
5811	2	1	1	3	0	3	1	3	1	1	3	2	1	1	3	0	3	1	3	1	1	3	4	4	5	2	1	1	1	1	1	4	4	4	4	1	4	5	5	5	2	1	3	4
5812	2	1	1	3	0	3	1	3	1	1	3	2	1	1	3	0	3	1	3	1	1	3	2	4	4	4	3	1	2	2	2	4	4	4	3	2	4	6	5	6	5	1	3	4
5813	2	1	1	3	0	3	1	3	1	1	3	2	1	1	3	0	3	1	3	1	1	3	4	4	3	3	1	2	1	1	1	2	4	2	2	2	4	4	2	4	2	1	3	1
5814	2	1	1	3	0	3	1	3	1	1	3	2	1	1	3	0	3	1	3	1	1	3	4	2	4	2	1	1	1	1	1	4	5	5	5	1	5	3	3	5	1	1	3	2
5815	2	1	1	3	0	3	1	3	1	1	3	2	1	1	3	0	3	1	3	1	1	3	4	4	4	2	1	1	3	4	2	4	4	4	3	4	4	4	5	4	3	2	1	4
5816	2	1	1	3	0	3	1	3	1	1	3	2	1	1	3	0	3	1	3	1	1	3	3	3	4	2	1	1	4	3	5	4	3	4	4	1	4	2	1	3	1	3	3	2
5817	2	1	1	3	0	3	1	3	1	1	3	2	1	1	3	0	3	1	3	1	1	3	3	2	5	3	1	2	3	1	1	4	4	3	1	1	5	5	4	6	5	2	3	1
5818	2	1	1	3	0	3	1	3	1	1	3	2	1	1	3	0	3	1	3	1	1	3	3	3	3	2	1	1	1	1	1	4	2	2	2	1	4	2	1	2	1	1	3	3
5819	2	1	1	2	0	3	1	3	1	1	3	2	1	1	2	0	3	1	3	1	1	3	2	4	4	2	2	0	1	2	1	4	4	4	2	4	3	6	5	6	3	1	3	4
5820	2	1	1	2	0	3	1	3	1	1	3	2	1	1	2	0	3	1	3	1	1	3	2	4	3	2	1	1	1	1	1	2	4	4	2	2	4	4	3	4	2	1	3	4
5821	2	1	1	2	0	3	1	3	1	1	3	2	1	1	2	0	3	1	3	1	1	3	3	4	4	2	1	1	1	1	3	2	4	3	3	2	4	3	2	3	3	1	3	3
5822	2	1	1	2	0	3	1	3	1	1	3	2	1	1	2	0	3	1	3	1	1	3	3	4	4	1	0	1	1	1	1	4	2	2	3	2	3	3	2	4	2	1	3	2
5823	2	1	1	2	0	3	1	3	1	1	3	2	1	1	2	0	3	1	3	1	1	3	2	3	4	2	1	1	1	1	1	2	5	5	5	2	5	5	5	8	10	1	3	1
5824	2	1	1	2	0	3	1	3	1	1	3	2	1	1	2	0	3	1	3	1	1	3	3	3	4	2	1	1	4	1	2	4	4	4	4	2	3	6	5	7	5	2	3	3
5825	2	1	1	2	0	3	1	3	1	1	3	2	1	1	2	0	3	1	3	1	1	3	4	4	5	2	1	1	1	1	1	4	4	4	2	1	4	5	5	7	2	1	3	3
5826	2	1	1	2	0	3	1	3	1	1	3	2	1	1	2	0	3	1	3	1	1	3	4	1	4	2	1	1	1	1	1	2	5	5	5	2	5	5	3	7	1	2	3	2
5827	2	1	1	2	0	3	1	3	1	1	3	2	1	1	2	0	3	1	3	1	1	3	3	3	5	3	1	2	3	1	1	4	4	4	5	2	4	5	3	7	5	1	3	2
5828	2	1	1	2	0	3	1	3	1	1	3	2	1	1	2	0	3	1	3	1	1	3	4	4	4	2	1	1	1	1	1	4	4	3	3	3	4	4	3	5	4	2	3	2
5829	2	1	1	2	0	3	1	3	1	1	3	2	1	1	2	0	3	1	3	1	1	3	3	3	4	2	1	1	2	1	2	2	3	4	3	2	5	3	2	7	3	2	3	2
5830	2	1	1	2	0	3	1	3	1	1	3	2	1	1	2	0	3	1	3	1	1	3	3	3	4	1	1	0	2	1	4	4	2	4	3	2	3	6	5	7	5	2	1	4
5831	2	1	1	2	0	3	1	3	1	1	3	2	1	1	2	0	3	1	3	1	1	3	2	5	5	3	2	1	5	1	1	1	5	5	5	1	5	5	5	6	2	1	3	4
5832	2	1	1	2	0	3	1	3	1	1	3	2	1	1	2	0	3	1	3	1	1	3	4	3	4	2	1	1	1	1	1	2	4	4	4	3	4	4	4	4	4	2	3	4
5833	2	1	1	2	0	3	1	3	1	1	3	2	1	1	2	0	3	1	3	1	1	3	3	3	3	1	0	1	2	1	1	2	4	4	4	3	3	2	2	4	2	1	3	3
5834	2	1	1	2	0	3	1	3	1	1	3	2	1	1	2	0	3	1	3	1	1	3	4	4	5	2	1	1	1	1	1	4	2	2	2	2	4	5	4	5	4	2	3	2
5835	2	1	1	2	0	3	1	3	1	1	3	2	1	1	2	0	3	1	3	1	1	3	3	2	4	2	1	1	1	1	1	4	2	2	1	1	4	5	5	7	5	2	3	2
5836	2	1	1	2	0	3	1	3	1	1	3	2	1	1	2	0	3	1	3	1	1	3	4	2	4	2	0	2	2	1	1	2	4	2	3	2	3	3	2	4	1	2	3	4
5837	2	1	1	2	0	3	1	3	1	1	3	2	1	1	2	0	3	1	3	1	1	3	4	4	4	5	2	3	1	1	1	4	5	5	5	3	2	3	4	2	5	2	3	1
5838	2	1	1	2	0	3	1	3	1	1	3	2	1	1	2	0	3	1	3	1	1	3	4	2	3	2	1	1	1	1	1	4	2	2	2	2	4	3	2	3	2	2	3	4
5839	2	1	1	2	0	3	1	3	1	1	3	2	1	1	2	0	3	1	3	1	1	3	4	3	3	2	1	1	1	1	1	2	4	3	4	3	3	4	3	5	3	1	3	2
5840	2	1	1	2	0	3	1	3	1	1	3	2	1	1	2	0	3	1	3	1	1	3	3	3	4	2	1	1	1	1	1	4	5	5	3	2	5	4	3	5	3	2	3	4
5841	2	1	1	2	0	3	1	3	1	1	3	2	1	1	2	0	3	1	3	1	1	3	2	3	4	2	1	1	1	1	1	2	4	3	2	2	3	3	3	4	2	2	3	2
5842	2	1	1	2	0	3	2	3	1	1	3	2	1	1	2	0	3	2	3	1	1	3	5	3	4	2	1	1	2	1	1	2	4	4	4	2	4	5	4	8	3	3	3	4
5843	2	1	1	2	0	3	2	3	1	1	3	2	1	1	2	0	3	2	3	1	1	3	2	3	3	4	2	2	3	3	3	4	3	3	4	3	4	5	4	5	3	1	3	2
5844	2	1	1	2	0	3	2	3	1	1	3	2	1	1	2	0	3	2	3	1	1	3	4	1	4	2	1	1	1	1	1	2	2	2	-8	1	5	5	5	6	2	1	3	2
5845	2	1	1	2	0	3	2	3	1	1	3	2	1	1	2	0	3	2	3	1	1	3	5	3	5	2	1	1	1	1	1	1	3	3	5	1	5	6	3	7	1	2	3	1
5846	2	1	1	2	0	3	2	3	1	1	3	2	1	1	2	0	3	2	3	1	1	3	4	4	4	2	1	1	1	1	1	2	4	2	4	2	4	5	3	6	3	1	3	2
5847	2	1	1	2	0	3	2	3	1	1	3	2	1	1	2	0	3	2	3	1	1	3	4	4	3	2	1	1	2	1	3	1	3	2	4	1	5	2	2	1	1	1	3	4
5848	2	1	1	2	0	3	2	3	1	1	3	2	1	1	2	0	3	2	3	1	1	3	2	3	4	2	1	1	1	1	1	2	4	2	2	2	4	4	3	5	3	1	3	2
5849	2	1	1	2	0	3	2	3	1	1	3	2	1	1	2	0	3	2	3	1	1	3	4	4	5	2	1	1	1	1	1	2	4	2	1	1	2	4	3	6	3	1	3	-8
5850	2	1	1	2	0	3	2	3	1	1	3	2	1	1	2	0	3	2	3	1	1	3	4	3	4	2	1	1	1	1	1	2	4	3	2	2	4	4	4	6	4	1	3	2
5851	2	1	1	2	0	3	2	3	1	1	3	2	1	1	2	0	3	2	3	1	1	3	4	2	4	2	1	1	3	2	3	1	2	2	4	2	5	5	3	6	1	2	3	4
5852	2	1	1	2	0	3	2	3	1	1	3	2	1	1	2	0	3	2	3	1	1	3	4	4	4	2	1	1	2	2	3	4	3	3	2	3	3	6	6	8	7	1	2	2
5853	2	1	1	2	0	3	2	3	1	1	3	2	1	1	2	0	3	2	3	1	1	3	2	4	4	2	1	1	2	2	3	1	3	2	3	2	3	6	6	6	5	2	2	2
5854	2	1	1	2	0	3	2	3	1	1	3	2	1	1	2	0	3	2	3	1	1	3	2	4	5	2	1	1	3	1	1	2	5	2	2	2	2	5	5	4	3	1	1	1
5855	2	1	1	2	0	3	2	3	1	1	3	2	1	1	2	0	3	2	3	1	1	3	2	4	4	2	97	97	1	1	1	4	3	3	3	2	4	4	4	4	3	1	3	2
5856	2	1	1	2	0	3	2	3	1	1	3	2	1	1	2	0	3	2	3	1	1	3	5	2	5	2	1	1	1	1	1	2	5	5	4	1	5	4	2	6	1	2	3	5
5857	2	1	1	3	0	3	2	3	1	1	3	2	1	1	3	0	3	2	3	1	1	3	2	3	4	1	0	1	1	1	1	2	4	2	2	1	4	5	2	7	4	2	3	2
5858	2	1	1	3	0	3	2	3	1	1	3	2	1	1	3	0	3	2	3	1	1	3	4	3	4	2	1	1	4	1	3	4	2	3	4	2	4	7	6	8	5	2	3	4
5859	2	1	1	3	0	3	2	3	1	1	3	2	1	1	3	0	3	2	3	1	1	3	3	4	4	2	1	1	3	1	1	2	5	5	3	2	4	4	3	4	1	2	3	1
5860	2	1	1	3	0	3	2	3	1	1	3	2	1	1	3	0	3	2	3	1	1	3	2	4	4	2	1	1	2	2	3	2	4	3	4	2	4	4	3	7	3	2	3	2
5861	2	1	1	3	0	3	2	3	1	1	3	2	1	1	3	0	3	2	3	1	1	3	1	4	5	8	4	4	1	1	1	2	4	4	2	4	4	6	4	7	2	1	3	2
5862	2	1	1	3	0	3	2	3	1	1	3	2	1	1	3	0	3	2	3	1	1	3	4	4	5	2	1	1	1	1	1	3	5	5	5	2	5	5	5	5	5	1	3	2
5863	2	1	1	3	0	3	2	3	1	1	3	2	1	1	3	0	3	2	3	1	1	3	4	4	4	2	1	1	1	2	2	2	2	2	2	1	3	6	7	7	6	2	3	2
5864	2	1	1	3	0	3	2	3	1	1	3	2	1	1	3	0	3	2	3	1	1	3	4	3	4	2	1	1	1	1	1	2	4	2	2	3	4	4	2	8	1	2	3	4
5865	2	1	1	3	0	3	2	3	1	1	3	2	1	1	3	0	3	2	3	1	1	3	4	4	4	2	1	1	2	1	1	4	2	1	3	1	5	5	3	6	4	2	1	4
5866	2	1	1	3	0	3	2	3	1	1	3	2	1	1	3	0	3	2	3	1	1	3	2	4	4	2	1	1	3	1	2	4	1	1	1	1	2	5	3	8	3	1	3	2
5867	2	1	1	3	0	3	2	3	0	1	3	2	1	1	3	0	3	2	3	0	1	3	2	4	4	2	1	1	1	1	1	2	2	4	2	2	4	5	5	7	4	1	3	2
5868	2	1	1	3	0	3	2	3	0	1	3	2	1	1	3	0	3	2	3	0	1	3	2	4	5	2	1	1	1	1	1	4	2	2	1	1	1	6	5	7	3	2	1	1
5869	2	1	1	3	0	3	2	3	0	1	3	2	1	1	3	0	3	2	3	0	1	3	4	4	5	2	1	1	2	1	1	2	4	5	3	2	5	5	3	7	3	1	3	4
5870	2	1	1	3	0	3	2	3	0	1	3	2	1	1	3	0	3	2	3	0	1	3	1	5	5	2	1	1	5	1	1	1	5	5	5	2	5	5	4	7	2	1	3	5
5871	2	1	1	3	0	3	2	3	0	1	3	2	1	1	3	0	3	2	3	0	1	3	2	2	3	2	1	1	3	1	3	4	4	2	4	2	4	5	3	7	3	1	3	4
5872	2	1	1	3	0	3	2	3	0	1	3	2	1	1	3	0	3	2	3	0	1	3	3	4	4	2	1	1	2	2	3	4	2	2	2	2	4	6	5	6	5	2	1	2
5873	2	1	1	3	0	3	2	3	0	1	3	2	1	1	3	0	3	2	3	0	1	3	3	4	4	2	1	1	3	3	3	4	4	2	4	2	4	3	1	5	1	1	3	1
5874	2	1	1	3	0	3	2	3	0	1	3	2	1	1	3	0	3	2	3	0	1	3	4	4	5	2	1	1	1	1	1	2	5	5	4	1	1	5	3	-8	3	1	3	1
5875	2	1	1	3	0	3	2	3	0	1	3	2	1	1	3	0	3	2	3	0	1	3	3	2	3	1	0	1	3	2	3	4	2	4	3	2	4	5	4	6	4	3	3	4
5876	2	1	1	3	0	3	2	3	0	1	3	2	1	1	3	0	3	2	3	0	1	3	4	4	4	2	1	1	1	1	1	2	2	2	2	2	5	5	4	7	4	1	3	2
5877	2	1	1	3	0	3	2	3	0	1	3	2	1	1	3	0	3	2	3	0	1	3	3	5	5	4	1	3	2	2	2	4	4	4	3	4	4	7	6	5	5	1	3	4
5878	2	1	1	3	0	3	2	3	0	1	3	2	1	1	3	0	3	2	3	0	1	3	4	2	4	1	0	1	1	1	1	4	4	2	3	1	2	3	3	3	1	1	3	5
5879	2	1	1	3	0	3	2	3	0	1	3	2	1	1	3	0	3	2	3	0	1	3	2	4	5	1	97	97	1	1	1	4	1	2	1	1	4	1	1	3	1	1	3	2
5880	2	1	1	3	0	3	2	3	0	1	3	2	1	1	3	0	3	2	3	0	1	3	2	3	5	2	1	1	3	2	1	2	4	5	5	4	3	1	1	5	5	2	3	2
5881	2	1	1	3	0	3	2	3	0	1	3	2	1	1	3	0	3	2	3	0	1	3	2	4	4	2	1	1	1	1	1	4	4	4	3	2	4	4	3	5	1	1	3	4
5882	2	1	1	3	0	3	2	3	0	1	3	2	1	1	3	0	3	2	3	0	1	3	2	2	4	2	1	1	1	1	1	2	2	2	4	2	4	4	6	8	6	1	3	2
5883	2	1	1	3	0	3	2	3	0	1	3	2	1	1	3	0	3	2	3	0	1	3	4	3	4	2	1	1	1	1	1	4	4	4	3	2	4	4	5	9	6	1	3	4
5884	2	1	1	3	0	3	2	3	0	1	3	2	1	1	3	0	3	2	3	0	1	3	4	4	4	2	1	1	3	1	3	2	3	4	2	1	4	4	3	5	2	1	3	1
5885	2	1	1	3	0	3	2	3	0	1	3	2	1	1	3	0	3	2	3	0	1	3	3	4	4	2	2	0	3	2	1	2	4	4	4	2	2	5	5	5	5	1	3	2
5886	2	1	1	3	0	3	2	3	0	1	3	2	1	1	3	0	3	2	3	0	1	3	2	4	4	2	1	1	2	1	3	4	4	4	4	3	3	5	4	5	1	1	3	4
5887	2	1	1	3	0	3	2	3	0	1	3	2	1	1	3	0	3	2	3	0	1	3	2	3	4	2	0	2	2	1	1	2	2	1	3	2	3	3	2	3	1	1	3	4
5888	2	1	1	3	0	3	2	3	0	1	3	2	1	1	3	0	3	2	3	0	1	3	3	4	4	2	1	1	1	1	1	2	2	3	3	1	4	7	5	8	3	2	3	2
5889	2	1	1	3	0	3	2	3	0	1	3	2	1	1	3	0	3	2	3	0	1	3	2	2	3	1	0	1	4	2	3	4	2	4	2	1	5	4	4	4	4	2	3	1
5890	2	1	1	3	0	3	2	3	0	1	3	2	1	1	3	0	3	2	3	0	1	3	2	4	5	1	0	1	1	1	1	4	4	4	3	2	5	4	3	4	3	3	3	2
5891	2	1	1	3	0	3	2	3	0	1	3	2	1	1	3	0	3	2	3	0	1	3	2	4	5	2	1	1	1	1	1	2	4	4	4	2	4	5	5	5	3	1	3	2
5892	2	1	1	3	0	3	2	3	0	1	3	2	1	1	3	0	3	2	3	0	1	3	4	2	4	2	1	1	1	1	1	2	4	4	4	1	5	4	3	4	3	1	3	4
5893	2	1	1	3	0	3	2	3	0	1	3	2	1	1	3	0	3	2	3	0	1	3	4	4	1	4	2	2	5	1	1	4	5	4	5	4	5	1	1	1	2	1	3	5
5894	2	1	1	3	0	3	2	3	0	1	3	2	1	1	3	0	3	2	3	0	1	3	2	4	4	4	2	2	1	1	1	4	4	4	2	1	4	5	4	6	4	1	3	4
5895	2	1	1	3	0	3	2	3	0	1	3	2	1	1	3	0	3	2	3	0	1	3	2	3	4	1	97	97	3	1	1	2	4	2	4	1	5	1	1	1	5	1	2	5
5896	2	1	1	3	0	3	2	3	0	1	3	2	1	1	3	0	3	2	3	0	1	3	2	4	5	2	1	1	1	1	1	4	4	4	2	1	4	6	5	7	4	1	3	4
5897	2	1	1	3	0	3	2	3	0	1	3	2	1	1	3	0	3	2	3	0	1	3	4	2	3	2	1	1	3	1	3	4	4	2	4	2	4	3	1	4	1	1	3	4
5898	2	1	1	3	0	3	2	3	0	1	3	2	1	1	3	0	3	2	3	0	1	3	2	4	4	2	1	1	1	1	1	2	2	2	2	1	3	7	6	8	6	1	3	2
5899	2	1	1	3	0	3	2	3	0	1	3	2	1	1	3	0	3	2	3	0	1	3	4	3	4	1	0	1	3	2	4	4	2	2	2	2	4	5	4	6	4	2	3	4
5900	2	1	1	3	0	3	2	3	0	1	3	2	1	1	3	0	3	2	3	0	1	3	2	4	4	2	1	1	1	1	1	2	4	2	2	1	5	6	4	8	3	1	3	2
5901	2	1	1	3	0	3	2	3	0	1	3	2	1	1	3	0	3	2	3	0	1	3	2	4	5	2	1	1	3	1	4	2	4	2	2	1	5	6	5	6	9	2	3	2
5902	2	1	1	3	0	3	2	3	0	1	3	2	1	1	3	0	3	2	3	0	1	3	5	3	4	1	1	0	1	1	1	4	2	4	3	2	3	4	5	5	5	-8	3	2
5903	2	1	1	3	0	3	2	3	0	1	3	2	1	1	3	0	3	2	3	0	1	3	3	3	4	2	1	1	1	1	1	4	4	4	2	3	2	5	4	6	4	1	3	2
5904	2	1	1	3	0	3	2	3	0	1	3	2	1	1	3	0	3	2	3	0	1	3	2	4	4	2	0	2	3	1	3	4	2	2	2	2	4	5	4	5	4	2	2	2
5905	2	1	1	3	0	3	2	3	0	1	3	2	1	1	3	0	3	2	3	0	1	3	2	4	5	2	1	1	4	1	1	2	4	2	2	2	4	4	2	7	2	2	3	2
5906	2	1	1	3	0	3	2	3	0	1	3	2	1	1	3	0	3	2	3	0	1	3	4	4	3	3	1	2	1	1	1	4	4	4	4	1	4	2	3	2	1	2	3	2
5907	2	1	1	3	0	3	2	3	0	1	3	2	1	1	3	0	3	2	3	0	1	3	3	3	4	2	1	1	1	1	1	4	4	4	4	3	4	5	4	4	4	2	2	3
5908	2	1	1	3	0	3	2	3	0	1	3	2	1	1	3	0	3	2	3	0	1	3	2	4	5	2	1	1	1	1	1	2	2	2	2	2	4	6	6	7	6	1	3	4
5909	2	1	1	3	0	3	2	3	0	1	3	2	1	1	3	0	3	2	3	0	1	3	2	4	4	2	1	1	3	1	3	4	4	4	4	2	3	6	4	7	3	2	3	3
5910	2	1	1	3	0	3	2	3	0	1	3	2	1	1	3	0	3	2	3	0	1	3	3	3	4	2	2	0	1	1	1	2	5	4	2	2	5	5	6	-8	2	2	2	1
5911	2	1	1	3	0	3	2	3	0	1	3	2	1	1	3	0	3	2	3	0	1	3	2	4	4	2	1	1	1	1	1	2	4	4	3	2	4	4	3	4	2	1	3	2
5912	2	1	1	3	0	3	2	3	0	1	3	2	1	1	3	0	3	2	3	0	1	3	3	2	5	1	0	1	5	1	3	4	3	1	5	1	5	8	5	9	5	2	3	4
5913	2	1	1	3	0	3	2	3	0	1	3	2	1	1	3	0	3	2	3	0	1	3	4	1	5	2	1	1	4	1	4	4	1	1	2	1	5	5	2	8	2	3	3	5
5914	2	1	1	3	0	3	2	3	0	1	3	2	1	1	3	0	3	2	3	0	1	3	2	4	3	2	1	1	1	1	1	2	4	2	2	2	2	4	3	4	2	1	3	2
5915	2	1	1	3	0	3	2	3	0	1	3	2	1	1	3	0	3	2	3	0	1	3	4	4	5	3	2	1	1	1	4	4	2	2	3	2	3	6	6	8	5	1	3	4
5916	2	1	1	3	0	3	2	3	0	1	3	2	1	1	3	0	3	2	3	0	1	3	4	2	3	2	1	1	1	1	1	2	4	4	4	3	3	5	5	6	4	1	3	2
5917	2	1	1	3	0	3	2	3	0	1	3	2	1	1	3	0	3	2	3	0	1	3	4	4	4	2	1	1	2	1	1	2	4	4	2	2	4	5	2	6	1	1	3	2
5918	2	1	1	3	0	3	2	3	0	1	3	2	1	1	3	0	3	2	3	0	1	3	2	3	4	2	1	1	2	1	1	2	2	2	5	1	4	1	1	5	1	3	3	4
5919	2	1	1	3	0	3	2	3	0	1	3	2	1	1	3	0	3	2	3	0	1	3	4	1	5	3	1	2	1	1	2	4	4	4	4	2	2	1	1	2	1	2	3	1
5920	2	1	1	3	0	3	2	3	0	1	3	2	1	1	3	0	3	2	3	0	1	3	3	4	3	2	1	1	1	1	3	4	2	2	2	2	4	5	4	5	3	2	3	4
5921	2	1	1	3	0	3	2	3	0	1	3	2	1	1	3	0	3	2	3	0	1	3	2	2	5	2	1	1	1	1	1	2	2	2	2	2	5	5	3	4	2	2	3	2
5922	2	1	1	3	0	3	2	3	0	1	3	2	1	1	3	0	3	2	3	0	1	3	2	4	4	3	2	1	2	1	1	2	4	4	4	4	4	4	4	4	4	1	3	4
5923	2	1	1	3	0	3	2	3	0	1	3	2	1	1	3	0	3	2	3	0	1	3	2	2	3	2	1	1	3	2	1	4	3	2	2	3	2	4	6	6	5	2	2	1
5924	2	1	1	3	0	3	2	3	0	1	3	2	1	1	3	0	3	2	3	0	1	3	2	4	4	2	1	1	1	1	3	4	4	4	4	1	4	3	3	3	3	1	3	2
5925	2	1	1	3	0	3	2	3	0	1	3	2	1	1	3	0	3	2	3	0	1	3	4	4	3	2	1	1	4	3	2	2	2	3	4	5	5	5	5	6	5	1	3	3
5926	2	1	1	3	0	3	2	3	0	1	3	2	1	1	3	0	3	2	3	0	1	3	4	1	4	2	1	1	3	1	1	2	5	5	5	4	5	2	2	2	2	2	3	2
5927	2	1	1	3	0	3	2	3	0	1	3	2	1	1	3	0	3	2	3	0	1	3	3	3	4	1	97	97	3	3	3	4	4	4	3	3	4	5	5	5	4	2	3	4
5928	2	1	1	3	0	3	2	3	0	1	3	2	1	1	3	0	3	2	3	0	1	3	2	4	4	2	1	1	1	1	1	2	4	3	2	1	4	4	2	6	3	1	3	2
5929	2	1	1	3	0	3	2	3	0	1	3	2	1	1	3	0	3	2	3	0	1	3	3	4	4	1	1	0	1	1	1	4	2	3	3	2	4	5	4	5	4	2	2	2
5930	2	1	1	3	0	3	2	3	0	1	3	2	1	1	3	0	3	2	3	0	1	3	4	3	4	2	1	1	3	1	1	4	4	2	5	2	4	7	6	7	4	2	3	2
5931	2	1	1	3	0	3	2	3	0	1	3	2	1	1	3	0	3	2	3	0	1	3	2	4	3	2	1	1	3	1	3	4	2	2	4	1	5	3	3	3	3	2	3	2
5932	2	1	1	3	0	3	2	3	0	1	3	2	1	1	3	0	3	2	3	0	1	3	3	3	4	2	1	1	3	1	3	4	4	4	3	3	2	4	3	6	4	1	3	3
5933	2	1	1	3	0	3	2	3	0	1	3	2	1	1	3	0	3	2	3	0	1	3	4	3	4	3	2	1	3	3	-8	2	4	3	4	3	3	4	3	5	2	2	3	2
5934	2	1	1	3	0	3	2	3	0	1	3	2	1	1	3	0	3	2	3	0	1	3	3	3	3	2	1	1	2	2	2	2	4	2	4	2	4	4	3	5	3	3	3	2
5935	2	1	1	3	0	3	2	3	0	1	3	2	1	1	3	0	3	2	3	0	1	3	4	3	3	2	1	1	3	3	2	2	4	3	5	1	3	3	3	5	5	3	3	2
5936	2	1	1	3	0	3	2	3	0	1	3	2	1	1	3	0	3	2	3	0	1	3	2	4	4	2	1	1	2	1	3	4	4	4	5	2	5	6	4	7	2	1	3	4
5937	2	1	1	3	0	3	2	3	0	1	3	2	1	1	3	0	3	2	3	0	1	3	3	2	5	1	0	1	1	1	1	2	1	4	2	1	5	5	5	8	4	1	3	4
5938	2	1	1	3	0	3	2	3	0	1	3	2	1	1	3	0	3	2	3	0	1	3	3	4	4	4	2	2	3	3	3	4	3	3	3	3	3	3	2	3	2	2	3	3
5939	2	1	1	3	0	3	2	3	0	1	3	2	1	1	3	0	3	2	3	0	1	3	2	4	4	2	1	1	1	1	1	2	4	2	2	4	5	5	4	6	2	1	1	4
5940	2	1	1	3	0	3	2	3	0	1	3	2	1	1	3	0	3	2	3	0	1	3	2	4	5	1	1	0	1	1	1	2	4	2	2	2	2	5	4	6	3	1	3	2
5941	2	1	1	3	0	3	2	3	0	1	3	2	1	1	3	0	3	2	3	0	1	3	5	4	5	2	1	1	1	1	1	2	4	3	4	4	5	1	1	-8	1	1	2	1
5942	2	1	1	3	0	3	2	3	0	1	3	2	1	1	3	0	3	2	3	0	1	3	2	4	4	3	1	2	1	1	1	4	2	4	4	4	5	4	4	7	4	1	3	2
5943	2	1	1	3	0	3	2	3	0	1	3	2	1	1	3	0	3	2	3	0	1	3	2	4	4	2	1	1	2	2	3	1	2	2	3	2	3	7	7	7	5	2	2	4
5944	2	1	1	3	0	3	2	3	0	1	3	2	1	1	3	0	3	2	3	0	1	3	1	4	5	4	2	2	1	1	1	2	1	1	5	1	5	5	6	4	6	1	3	2
5945	2	1	1	3	0	3	2	3	0	1	3	2	1	1	3	0	3	2	3	0	1	3	2	4	4	2	1	1	1	1	2	2	2	2	2	1	5	3	2	4	2	1	3	4
5946	2	1	1	3	0	3	2	3	0	1	3	2	1	1	3	0	3	2	3	0	1	3	3	2	4	2	1	1	2	1	3	4	4	4	2	2	4	6	5	6	5	1	3	4
5947	2	1	1	3	0	3	2	3	0	1	3	2	1	1	3	0	3	2	3	0	1	3	3	2	2	1	1	0	2	2	1	4	4	3	3	3	3	3	2	3	1	1	3	4
5948	2	1	1	3	0	3	2	3	0	1	3	2	1	1	3	0	3	2	3	0	1	3	4	2	4	2	1	1	3	1	3	2	4	4	4	2	4	5	5	6	5	2	3	2
5949	2	1	1	3	0	3	2	3	0	1	3	2	1	1	3	0	3	2	3	0	1	3	4	4	5	7	5	2	1	1	1	2	4	5	5	5	2	5	4	6	2	1	3	4
5950	2	1	1	3	0	3	2	3	0	1	3	2	1	1	3	0	3	2	3	0	1	3	2	4	4	3	2	1	3	1	3	2	4	4	3	3	2	4	4	4	3	2	3	2
5951	2	1	1	3	0	3	2	3	0	1	3	2	1	1	3	0	3	2	3	0	1	3	4	3	3	3	2	1	1	1	1	2	5	5	5	3	2	2	2	2	2	1	3	2
5952	2	1	1	3	0	3	2	3	0	1	3	2	1	1	3	0	3	2	3	0	1	3	2	4	5	2	1	1	1	1	1	2	2	2	2	2	3	5	5	5	5	2	3	2
5953	2	1	1	3	0	3	2	3	0	1	3	2	1	1	3	0	3	2	3	0	1	3	2	4	4	2	1	1	1	1	1	4	5	4	4	3	2	4	3	5	3	1	3	2
5954	2	1	1	3	0	3	2	3	0	1	3	2	1	1	3	0	3	2	3	0	1	3	4	2	5	2	1	1	1	1	1	2	4	4	3	2	4	5	5	5	2	1	3	2
5955	2	1	1	3	0	3	2	3	0	1	2	2	1	1	3	0	3	2	3	0	1	2	3	1	4	2	1	1	1	1	1	4	4	5	4	4	4	2	2	2	3	2	1	2
5956	2	1	1	3	0	3	2	3	0	1	2	2	1	1	3	0	3	2	3	0	1	2	4	4	4	2	1	1	1	1	3	2	4	2	4	2	4	4	3	5	3	2	3	4
5957	2	1	1	3	0	3	2	3	0	1	2	2	1	1	3	0	3	2	3	0	1	2	2	3	4	2	0	2	3	3	3	2	4	2	5	2	3	4	4	6	1	1	3	2
5958	2	1	1	3	0	3	2	3	0	1	2	2	1	1	3	0	3	2	3	0	1	2	2	4	4	2	1	1	4	1	2	4	4	4	4	1	4	5	5	7	5	2	3	4
5959	2	1	1	3	0	3	2	3	0	1	2	2	1	1	3	0	3	2	3	0	1	2	2	4	5	2	1	1	2	1	1	2	4	4	4	2	4	5	5	5	5	1	3	4
5960	2	1	1	3	0	3	2	3	0	1	2	2	1	1	3	0	3	2	3	0	1	2	3	1	5	2	1	1	4	4	3	4	4	5	5	1	3	5	5	5	5	2	3	5
5961	2	1	1	3	0	3	2	3	0	1	2	2	1	1	3	0	3	2	3	0	1	2	2	4	4	2	1	1	1	1	1	4	4	4	3	3	2	4	3	4	1	1	3	4
5962	2	1	1	3	0	3	2	3	0	1	2	2	1	1	3	0	3	2	3	0	1	2	4	3	4	2	1	1	3	1	3	4	2	2	4	1	5	4	4	4	4	2	1	2
5963	2	1	1	3	0	3	2	3	0	1	2	2	1	1	3	0	3	2	3	0	1	2	2	4	4	2	1	1	1	1	3	4	2	2	2	2	4	6	5	6	4	1	2	2
5964	2	1	1	3	0	3	2	3	0	1	2	2	1	1	3	0	3	2	3	0	1	2	1	3	4	2	1	1	1	1	1	2	4	4	3	3	4	1	1	5	1	3	3	3
5965	2	1	1	3	0	3	2	3	0	1	2	2	1	1	3	0	3	2	3	0	1	2	2	4	5	2	1	1	1	1	1	4	4	4	3	3	4	5	3	5	3	1	3	2
5966	2	1	1	3	0	3	2	3	0	1	2	2	1	1	3	0	3	2	3	0	1	2	1	4	5	2	0	2	1	1	1	2	5	5	5	2	5	6	8	5	8	2	1	1
5967	2	1	1	3	0	3	2	3	0	1	0	2	1	1	3	0	3	2	3	0	1	0	2	4	5	2	1	1	2	2	2	4	4	3	2	2	4	6	5	6	5	2	2	4
5968	2	1	1	3	0	3	2	3	0	1	0	2	1	1	3	0	3	2	3	0	1	0	2	5	4	2	1	1	1	1	1	4	3	2	1	1	2	4	2	6	2	1	3	1
5969	2	1	1	4	0	3	2	3	0	1	0	2	1	1	4	0	3	2	3	0	1	0	2	4	4	2	1	1	1	1	1	4	4	2	3	2	4	6	6	8	4	1	2	2
5970	2	1	1	4	0	3	2	3	0	1	0	2	1	1	4	0	3	2	3	0	1	0	3	4	4	1	0	1	1	1	2	2	2	4	3	2	4	3	2	3	2	2	3	3
5971	2	1	1	4	0	3	2	3	0	1	0	2	1	1	4	0	3	2	3	0	1	0	1	4	5	2	0	2	2	1	1	2	4	1	4	1	5	8	5	10	1	1	1	1
5972	2	1	1	4	0	3	2	3	0	1	0	2	1	1	4	0	3	2	3	0	1	0	4	4	4	2	1	1	1	1	1	3	2	1	5	1	5	5	7	7	5	2	3	2
5973	2	1	1	4	0	3	2	3	0	1	0	2	1	1	4	0	3	2	3	0	1	0	3	4	4	2	1	1	2	1	1	4	2	3	2	2	3	5	5	5	2	1	3	3
5974	2	1	1	4	0	3	2	3	0	1	0	2	1	1	4	0	3	2	3	0	1	0	3	3	5	3	2	1	3	1	1	2	4	4	3	2	3	4	1	7	5	2	3	1
5975	2	1	1	4	0	3	2	3	0	1	0	2	1	1	4	0	3	2	3	0	1	0	3	4	4	2	1	1	2	1	3	4	3	3	2	2	5	5	4	6	4	2	3	4
5976	2	1	1	4	0	3	2	3	0	1	0	2	1	1	4	0	3	2	3	0	1	0	3	3	5	2	1	1	3	1	1	4	4	4	4	2	4	5	4	5	4	2	3	1
5977	2	1	1	4	0	3	2	3	0	1	0	2	1	1	4	0	3	2	3	0	1	0	4	4	4	1	1	0	1	1	1	4	4	3	4	2	3	4	3	5	3	2	1	3
5978	2	1	1	4	0	3	2	3	0	1	0	2	1	1	4	0	3	2	3	0	1	0	3	3	4	2	1	1	4	1	2	2	4	2	3	2	2	6	4	7	4	2	1	2
5979	2	1	1	4	0	3	2	3	0	1	0	2	1	1	4	0	3	2	3	0	1	0	2	4	4	2	1	1	1	1	1	2	3	2	2	2	4	6	5	6	4	2	2	3
5980	2	1	1	4	0	3	2	3	0	1	0	2	1	1	4	0	3	2	3	0	1	0	2	4	5	2	1	1	1	1	1	4	4	4	4	4	4	7	5	8	4	1	3	2
5981	2	1	1	4	0	3	2	3	0	1	0	2	1	1	4	0	3	2	3	0	1	0	2	4	4	2	1	1	2	2	2	4	3	3	3	2	3	5	4	6	4	2	3	2
5982	2	1	1	4	0	3	2	3	0	1	0	2	1	1	4	0	3	2	3	0	1	0	3	3	3	2	2	0	3	2	2	1	3	3	2	3	3	4	3	6	3	2	3	2
5983	2	1	1	4	0	3	2	3	0	1	0	2	1	1	4	0	3	2	3	0	1	0	2	4	4	2	1	1	4	2	4	4	2	3	2	1	4	4	3	5	3	2	3	4
5984	2	1	1	4	0	3	2	3	0	1	0	2	1	1	4	0	3	2	3	0	1	0	4	3	3	2	1	1	1	1	1	4	2	4	2	2	4	5	4	6	2	1	3	2
5985	2	1	1	4	0	3	2	3	0	1	0	2	1	1	4	0	3	2	3	0	1	0	2	3	5	2	1	1	1	1	1	2	3	2	1	1	4	5	5	8	5	2	3	2
5986	2	1	1	4	0	3	2	3	0	1	0	2	1	1	4	0	3	2	3	0	1	0	2	4	4	2	1	1	4	4	3	4	3	2	3	2	3	6	6	8	6	2	3	4
5987	2	1	1	4	0	3	2	3	0	1	0	2	1	1	4	0	3	2	3	0	1	0	4	3	4	2	1	1	1	1	1	4	4	4	4	1	4	5	5	6	3	2	3	3
5988	2	1	1	4	0	3	2	3	0	1	0	2	1	1	4	0	3	2	3	0	1	0	2	2	4	2	1	1	3	1	3	4	4	3	3	2	4	3	3	4	3	2	2	4
5989	2	1	1	4	0	3	2	3	0	1	0	2	1	1	4	0	3	2	3	0	1	0	3	4	4	1	1	0	1	1	1	4	4	4	3	2	3	7	5	7	5	-8	3	3
5990	2	1	1	4	0	3	2	3	0	1	0	2	1	1	4	0	3	2	3	0	1	0	1	4	5	2	1	1	1	1	3	3	5	5	4	2	4	6	5	6	3	1	3	2
5991	2	1	1	4	0	3	2	3	0	1	0	2	1	1	4	0	3	2	3	0	1	0	3	1	3	2	1	1	3	3	3	4	1	1	1	1	5	4	3	4	2	1	3	4
5992	2	1	1	4	0	3	2	3	0	1	0	2	1	1	4	0	3	2	3	0	1	0	4	4	5	2	1	1	1	1	1	2	1	2	2	1	5	5	4	5	3	2	3	2
5993	2	1	1	4	0	3	2	3	0	1	0	2	1	1	4	0	3	2	3	0	1	0	2	4	5	2	1	1	3	1	1	4	2	2	3	2	4	5	4	6	4	2	1	3
5994	2	1	1	4	0	3	2	3	0	1	0	2	1	1	4	0	3	2	3	0	1	0	4	4	4	4	3	1	1	2	3	2	4	4	3	4	4	6	5	5	6	2	3	2
5995	2	1	1	4	0	3	2	3	0	1	0	2	1	1	4	0	3	2	3	0	1	0	4	1	3	2	1	1	1	1	1	4	3	4	3	2	3	3	4	4	2	2	3	3
5996	2	1	1	4	0	3	2	3	0	1	0	2	1	1	4	0	3	2	3	0	1	0	4	4	4	2	1	1	1	1	1	1	5	4	4	1	5	3	4	3	3	2	3	4
5997	2	1	1	4	0	3	2	3	0	1	0	2	1	1	4	0	3	2	3	0	1	0	3	4	5	2	1	1	1	1	3	3	4	4	3	2	4	5	3	5	2	1	3	2
5998	2	1	1	4	0	3	3	3	0	1	0	2	1	1	4	0	3	3	3	0	1	0	2	4	5	2	1	1	1	1	1	4	4	3	2	2	4	1	1	2	1	1	3	4
5999	2	1	1	4	0	3	3	3	0	1	0	2	1	1	4	0	3	3	3	0	1	0	4	2	3	2	0	2	4	4	4	4	2	2	2	2	4	5	5	6	5	2	1	4
6000	2	1	1	4	0	3	3	3	0	1	0	2	1	1	4	0	3	3	3	0	1	0	4	4	4	1	1	0	2	1	1	4	3	3	2	2	3	4	3	4	3	1	3	2
6001	2	1	1	4	0	3	3	3	0	1	0	2	1	1	4	0	3	3	3	0	1	0	1	4	4	3	1	2	1	1	1	2	2	2	2	2	5	5	8	5	2	2	2	2
6002	2	1	1	4	0	3	3	3	0	1	0	2	1	1	4	0	3	3	3	0	1	0	2	5	5	2	1	1	1	1	1	4	4	4	4	2	4	5	6	7	4	2	3	2
6003	2	1	1	4	0	3	3	3	0	1	0	2	1	1	4	0	3	3	3	0	1	0	3	2	4	2	1	1	2	2	2	4	4	3	2	2	3	6	5	7	4	2	3	3
6004	2	1	1	4	0	3	3	3	0	1	0	2	1	1	4	0	3	3	3	0	1	0	1	4	5	2	1	1	3	1	1	2	4	4	4	1	4	6	5	7	5	2	3	2
6005	2	1	1	4	0	3	3	3	0	1	0	2	1	1	4	0	3	3	3	0	1	0	2	2	4	2	1	1	1	1	1	4	3	3	3	2	2	5	5	5	5	1	3	-8
6006	2	1	1	4	0	3	3	3	0	1	0	2	1	1	4	0	3	3	3	0	1	0	2	4	4	2	1	1	2	2	3	4	3	3	3	2	3	3	3	4	3	2	3	3
6007	2	1	1	4	0	3	3	3	0	1	0	2	1	1	4	0	3	3	3	0	1	0	3	4	4	1	1	0	2	1	2	4	2	4	2	2	4	5	4	6	4	1	3	4
6008	2	1	1	4	0	3	3	3	0	1	0	2	1	1	4	0	3	3	3	0	1	0	2	4	4	4	2	2	2	1	3	4	4	4	4	2	4	4	2	6	1	1	3	4
6009	2	1	1	4	0	3	3	3	0	1	0	2	1	1	4	0	3	3	3	0	1	0	2	4	4	2	97	97	1	1	1	4	5	5	5	2	3	5	3	7	2	1	3	2
6010	2	1	1	4	0	3	3	3	0	1	0	2	1	1	4	0	3	3	3	0	1	0	4	3	5	2	1	1	3	1	1	4	2	2	2	2	4	6	6	6	4	1	3	4
6011	2	1	1	4	0	3	3	3	0	1	0	2	1	1	4	0	3	3	3	0	1	0	1	3	4	2	1	1	1	1	1	2	5	3	1	1	5	5	7	6	5	1	3	3
6012	2	1	1	4	0	3	3	3	0	1	0	2	1	1	4	0	3	3	3	0	1	0	2	4	4	2	2	0	3	1	3	4	4	2	3	2	3	5	3	6	3	1	3	2
6013	2	1	1	4	0	3	3	3	0	1	0	2	1	1	4	0	3	3	3	0	1	0	4	2	5	1	1	0	3	1	1	2	2	4	1	1	4	3	1	6	1	1	1	5
6014	2	1	1	4	0	3	3	3	0	1	0	2	1	1	4	0	3	3	3	0	1	0	4	4	4	2	1	1	1	1	1	4	2	2	2	1	4	5	5	5	5	1	3	4
6015	2	1	1	4	0	3	3	3	0	1	0	2	1	1	4	0	3	3	3	0	1	0	4	2	4	2	1	1	1	1	1	4	4	2	2	2	5	6	7	5	7	2	2	2
6016	2	1	1	4	0	3	3	3	0	1	0	2	1	1	4	0	3	3	3	0	1	0	4	3	3	2	1	1	3	2	2	4	4	3	2	3	3	5	4	5	4	1	3	4
6017	2	1	1	4	0	3	3	3	0	1	0	2	1	1	4	0	3	3	3	0	1	0	4	4	4	2	1	1	1	1	1	2	4	4	4	1	5	5	5	8	5	1	3	2
6018	2	1	1	4	0	3	3	3	0	1	0	2	1	1	4	0	3	3	3	0	1	0	3	2	2	2	1	1	1	1	1	2	2	2	2	1	4	1	7	5	7	2	3	4
6019	2	1	1	4	0	3	3	3	0	1	0	2	1	1	4	0	3	3	3	0	1	0	4	1	4	2	1	1	2	1	1	2	2	5	5	1	5	5	3	8	3	2	3	4
6020	2	1	1	4	0	3	3	3	0	1	0	2	1	1	4	0	3	3	3	0	1	0	3	4	4	2	1	1	1	1	1	4	4	3	3	3	4	5	4	6	4	2	3	4
6021	2	1	1	4	0	3	3	3	0	1	0	2	1	1	4	0	3	3	3	0	1	0	2	4	4	3	2	1	4	1	2	4	3	3	4	2	3	5	3	7	2	1	3	2
6022	2	1	1	4	0	3	3	3	0	1	0	2	1	1	4	0	3	3	3	0	1	0	4	4	4	2	1	1	2	3	3	4	4	2	4	3	5	5	3	4	2	2	3	5
6023	2	1	1	4	0	3	3	3	0	1	0	2	1	1	4	0	3	3	3	0	1	0	4	2	5	1	1	0	1	1	1	2	4	5	5	1	5	5	1	10	1	2	2	1
6024	2	1	1	4	0	3	3	3	0	1	0	2	1	1	4	0	3	3	3	0	1	0	4	3	4	1	1	0	3	1	4	2	4	4	3	2	3	5	4	5	4	2	1	3
6025	2	1	1	4	0	3	3	3	0	1	0	2	1	1	4	0	3	3	3	0	1	0	3	3	4	2	1	1	3	1	1	2	4	4	4	2	4	2	2	6	4	2	3	4
6026	2	1	1	4	0	3	3	3	0	1	0	2	1	1	4	0	3	3	3	0	1	0	3	1	4	2	1	1	4	1	2	2	5	2	4	1	5	1	1	1	1	1	3	2
6027	2	1	1	4	0	3	3	3	0	1	0	2	1	1	4	0	3	3	3	0	1	0	2	4	4	3	2	1	1	1	1	2	4	3	3	3	3	5	5	6	4	1	3	2
6028	2	1	1	4	0	3	3	3	0	1	0	2	1	1	4	0	3	3	3	0	1	0	5	3	4	1	1	0	4	1	2	4	2	3	4	2	3	7	5	7	5	2	3	4
6029	2	1	1	4	0	3	3	3	0	1	0	2	1	1	4	0	3	3	3	0	1	0	4	4	5	6	4	2	5	1	1	2	5	5	5	1	5	5	3	7	1	1	3	2
6030	2	1	1	4	0	3	3	3	0	1	0	2	1	1	4	0	3	3	3	0	1	0	3	2	5	1	0	1	2	1	1	2	1	2	1	1	5	5	4	6	3	2	3	2
6031	2	1	1	4	0	3	3	3	0	1	0	2	1	1	4	0	3	3	3	0	1	0	2	4	4	2	1	1	2	1	1	2	4	4	4	4	4	5	5	5	5	1	3	4
6032	2	1	1	4	0	3	3	3	0	1	0	2	1	1	4	0	3	3	3	0	1	0	3	4	4	2	1	1	2	1	3	4	4	4	4	3	4	5	5	7	5	2	3	4
6033	2	1	1	4	0	3	3	3	0	1	0	2	1	1	4	0	3	3	3	0	1	0	2	4	4	2	1	1	1	1	1	4	4	4	4	3	4	1	1	1	1	1	3	4
6034	2	1	1	4	0	3	3	3	0	1	0	2	1	1	4	0	3	3	3	0	1	0	2	4	5	2	1	1	2	1	1	4	3	4	4	1	4	6	7	7	7	2	3	4
6035	2	1	1	4	0	3	3	3	0	1	0	2	1	1	4	0	3	3	3	0	1	0	4	5	5	3	1	2	2	1	3	2	2	2	3	1	5	5	2	5	5	2	1	5
6036	2	1	1	4	0	3	3	3	0	1	0	2	1	1	4	0	3	3	3	0	1	0	4	4	4	4	2	2	1	1	1	2	4	4	4	2	5	4	6	6	4	1	3	2
6037	2	1	1	4	0	3	3	3	0	1	0	2	1	1	4	0	3	3	3	0	1	0	3	4	4	2	1	1	2	2	3	2	4	4	2	2	4	5	4	6	3	1	3	3
6038	2	1	1	4	0	3	3	3	0	1	0	2	1	1	4	0	3	3	3	0	1	0	2	1	5	1	0	1	3	1	1	2	2	2	2	2	5	6	4	8	4	2	3	3
6039	2	1	1	4	0	3	3	3	0	1	0	2	1	1	4	0	3	3	3	0	1	0	2	4	5	4	2	2	3	2	1	2	5	5	4	2	4	5	1	6	1	1	3	1
6040	2	1	1	4	0	3	3	3	0	1	0	2	1	1	4	0	3	3	3	0	1	0	4	3	4	2	1	1	3	3	3	1	4	4	4	2	3	4	2	4	3	2	2	1
6041	2	1	1	4	0	3	3	2	0	1	0	2	1	1	4	0	3	3	2	0	1	0	4	3	4	2	1	1	4	3	4	4	3	4	3	4	4	6	5	5	6	1	3	4
6042	2	1	1	4	0	3	3	2	0	1	0	2	1	1	4	0	3	3	2	0	1	0	2	2	4	4	1	3	1	1	1	2	4	5	5	4	5	4	5	5	4	2	3	4
6043	2	1	1	4	0	3	3	2	0	1	0	2	1	1	4	0	3	3	2	0	1	0	4	4	4	4	2	2	1	1	1	2	4	4	4	2	4	3	3	4	1	1	3	2
6044	2	1	1	4	0	3	3	2	0	1	0	2	1	1	4	0	3	3	2	0	1	0	3	4	4	4	2	2	2	1	3	4	4	4	4	2	4	5	3	6	1	1	3	4
6045	2	1	1	4	0	3	3	2	0	1	0	2	1	1	4	0	3	3	2	0	1	0	2	4	4	2	1	1	1	1	1	2	2	2	4	1	5	5	5	5	3	1	3	2
6046	2	1	1	4	0	3	3	2	0	1	0	2	1	1	4	0	3	3	2	0	1	0	2	4	4	5	1	4	1	1	1	4	4	4	4	4	4	6	7	5	4	2	3	1
6047	2	1	1	4	0	3	3	2	0	1	0	2	1	1	4	0	3	3	2	0	1	0	3	3	4	2	1	1	3	2	2	2	4	2	2	3	4	4	3	6	3	2	3	2
6048	2	1	1	4	0	3	3	2	0	1	0	2	1	1	4	0	3	3	2	0	1	0	4	2	3	2	1	1	1	1	1	1	1	2	2	2	5	2	1	3	1	2	1	4
6049	2	1	1	4	0	3	3	2	0	1	0	2	1	1	4	0	3	3	2	0	1	0	2	3	4	2	1	1	2	1	3	2	4	2	3	2	4	5	4	6	3	1	3	4
6050	2	1	1	4	0	3	3	2	0	1	0	2	1	1	4	0	3	3	2	0	1	0	3	4	4	2	1	1	1	1	2	2	4	2	2	2	5	5	4	6	5	2	1	4
6051	2	1	1	4	0	3	3	2	0	1	0	2	1	1	4	0	3	3	2	0	1	0	4	5	4	1	1	0	4	1	3	4	4	3	4	4	4	6	5	6	5	1	3	3
6052	2	1	1	4	0	3	3	2	0	1	0	2	1	1	4	0	3	3	2	0	1	0	4	3	4	2	1	1	4	1	1	4	4	3	4	3	3	7	5	8	5	1	3	2
6053	2	1	1	4	0	3	3	2	0	1	0	2	1	1	4	0	3	3	2	0	1	0	2	3	4	2	1	1	1	1	3	2	4	2	1	1	5	5	5	6	4	2	3	4
6054	2	1	1	4	0	3	3	2	0	1	0	2	1	1	4	0	3	3	2	0	1	0	3	3	4	3	1	2	2	1	1	2	4	4	4	4	4	5	5	5	5	1	3	4
6055	2	1	1	4	0	3	3	2	0	1	0	2	1	1	4	0	3	3	2	0	1	0	4	4	4	2	0	2	3	2	3	4	4	2	4	2	5	3	2	6	2	2	3	5
6056	2	1	1	4	0	3	3	2	0	1	0	2	1	1	4	0	3	3	2	0	1	0	2	4	4	4	2	2	2	2	3	1	2	4	3	2	3	4	4	4	4	2	3	3
6057	2	1	1	4	0	3	3	2	0	1	0	2	1	1	4	0	3	3	2	0	1	0	2	4	4	6	3	3	1	1	1	4	4	4	4	4	2	3	1	2	1	1	3	1
6058	2	1	1	4	0	3	3	2	0	1	0	2	1	1	4	0	3	3	2	0	1	0	4	4	4	3	2	1	1	1	1	4	3	4	2	2	5	4	2	4	2	1	1	2
6059	2	1	1	4	0	3	3	2	0	1	0	2	1	1	4	0	3	3	2	0	1	0	4	3	3	2	1	1	2	1	1	4	2	4	2	2	4	5	4	5	4	1	3	4
6060	2	1	1	4	0	3	3	2	0	1	0	2	1	1	4	0	3	3	2	0	1	0	2	4	4	4	2	2	1	1	3	4	4	4	3	1	2	2	2	3	2	1	3	3
6061	2	1	1	4	0	3	3	2	0	1	0	2	1	1	4	0	3	3	2	0	1	0	4	2	4	2	1	1	4	1	1	2	4	4	5	1	5	1	1	1	1	2	3	5
6062	2	1	1	4	0	3	3	2	0	1	0	2	1	1	4	0	3	3	2	0	1	0	2	4	4	2	1	1	1	1	1	2	2	1	4	1	5	3	3	3	3	1	3	2
6063	2	1	1	4	0	3	3	2	0	1	0	2	1	1	4	0	3	3	2	0	1	0	4	4	5	3	1	2	1	1	1	4	5	5	4	2	4	4	6	5	6	1	3	1
6064	2	1	1	4	0	3	3	2	0	1	0	2	1	1	4	0	3	3	2	0	1	0	2	3	2	2	1	1	1	1	3	4	4	4	4	1	4	2	2	3	3	1	2	2
6065	2	1	1	4	0	3	3	2	0	1	0	2	1	1	4	0	3	3	2	0	1	0	3	3	4	2	1	1	3	3	3	1	4	4	3	3	3	4	4	4	3	2	3	4
6066	2	1	1	4	0	3	3	2	0	1	0	2	1	1	4	0	3	3	2	0	1	0	3	4	4	6	3	3	1	1	1	2	4	4	4	2	4	5	4	6	-8	1	3	2
6067	2	1	1	4	0	3	3	2	0	1	0	2	1	1	4	0	3	3	2	0	1	0	4	2	3	0	0	0	3	1	5	1	2	2	2	2	4	4	3	5	4	2	3	3
6068	2	1	1	4	0	3	3	2	0	1	0	2	1	1	4	0	3	3	2	0	1	0	3	3	4	1	0	1	2	1	2	4	2	2	2	1	4	4	3	4	2	3	3	4
6069	2	1	1	4	0	3	3	2	0	1	0	2	1	1	4	0	3	3	2	0	1	0	3	4	4	2	1	1	3	1	2	4	4	3	2	2	2	5	4	5	4	1	3	2
6070	2	1	1	4	0	3	3	2	0	1	0	2	1	1	4	0	3	3	2	0	1	0	4	4	3	2	1	1	1	1	1	4	4	4	3	1	2	3	2	3	2	1	3	2
6071	2	1	1	4	0	3	3	2	0	1	0	2	1	1	4	0	3	3	2	0	1	0	2	5	5	2	1	1	1	1	1	4	4	4	4	3	3	3	5	2	2	1	3	2
6072	2	1	1	4	0	3	3	2	0	1	0	2	1	1	4	0	3	3	2	0	1	0	2	5	5	7	1	6	1	1	1	2	4	4	4	2	2	6	5	6	5	2	3	2
6073	2	1	1	4	0	3	3	2	0	1	0	2	1	1	4	0	3	3	2	0	1	0	3	3	4	2	1	1	2	1	1	2	4	2	2	3	3	4	3	6	2	1	3	2
6074	2	1	1	4	0	3	3	2	0	1	0	2	1	1	4	0	3	3	2	0	1	0	2	3	4	1	0	1	1	1	1	2	2	2	2	2	4	4	3	4	3	2	1	2
6075	2	1	1	4	0	3	3	2	0	1	0	2	1	1	4	0	3	3	2	0	1	0	2	2	4	1	1	0	2	2	1	4	4	4	5	1	5	6	4	7	4	3	3	3
6076	2	1	1	4	0	3	3	2	0	1	0	2	1	1	4	0	3	3	2	0	1	0	4	3	4	2	1	1	1	1	1	2	2	4	2	1	5	5	7	10	3	2	3	1
6077	2	1	1	4	0	3	3	2	0	1	0	2	1	1	4	0	3	3	2	0	1	0	4	2	4	1	97	97	1	1	1	4	2	2	2	1	4	3	3	4	1	1	3	4
6078	2	1	1	4	0	3	3	2	0	1	0	2	1	1	4	0	3	3	2	0	1	0	2	4	3	3	1	2	1	1	1	1	4	4	4	2	3	3	2	5	2	1	3	3
6079	2	1	1	4	0	3	3	2	0	1	0	2	1	1	4	0	3	3	2	0	1	0	-8	4	4	2	1	1	1	1	1	4	4	4	4	1	4	3	2	3	1	2	3	2
6080	2	1	1	4	0	3	3	2	0	1	0	2	1	1	4	0	3	3	2	0	1	0	4	4	4	2	1	1	4	2	1	2	4	4	4	4	4	6	5	7	5	1	3	-8
6081	2	1	1	4	0	3	3	2	0	1	0	2	1	1	4	0	3	3	2	0	1	0	4	2	4	1	0	1	3	1	3	4	4	3	2	2	2	4	1	5	1	1	2	2
6082	2	1	1	4	0	3	3	2	0	1	0	2	1	1	4	0	3	3	2	0	1	0	4	5	4	2	1	1	4	1	1	2	5	5	5	4	5	5	6	4	6	1	3	4
6083	2	1	1	4	0	3	3	2	0	1	0	2	1	1	4	0	3	3	2	0	1	0	3	5	4	2	1	1	1	1	1	4	4	4	4	2	4	4	3	4	3	2	1	2
6084	2	1	1	4	0	3	3	2	0	1	0	2	1	1	4	0	3	3	2	0	1	0	3	4	4	2	1	1	2	1	1	4	2	2	2	2	3	4	3	4	2	2	3	4
6085	2	1	1	4	0	3	3	2	0	1	0	2	1	1	4	0	3	3	2	0	1	0	4	4	4	2	1	1	1	1	1	4	4	4	4	4	2	6	5	7	6	1	1	2
6086	2	1	1	4	0	3	3	2	0	1	0	2	1	1	4	0	3	3	2	0	1	0	3	2	4	2	1	1	2	2	3	4	4	4	3	2	4	4	3	6	3	2	3	4
6087	2	1	1	4	0	3	3	2	0	1	0	2	1	1	4	0	3	3	2	0	1	0	4	3	4	2	1	1	3	2	3	4	4	3	2	2	4	7	6	7	6	1	3	2
6088	2	1	1	4	0	3	3	2	0	1	0	2	1	1	4	0	3	3	2	0	1	0	4	4	4	3	1	2	1	1	1	4	4	4	4	2	2	4	5	4	4	2	3	2
6089	2	1	1	4	0	3	3	2	0	1	0	2	1	1	4	0	3	3	2	0	1	0	4	4	4	2	1	1	2	2	1	2	2	2	2	1	2	6	7	7	6	1	3	2
6090	2	1	1	4	0	3	3	2	0	1	0	2	1	1	4	0	3	3	2	0	1	0	3	4	4	2	1	1	4	1	3	4	4	3	4	3	4	5	3	9	3	2	3	1
6091	2	1	1	4	0	3	3	2	0	1	0	2	1	1	4	0	3	3	2	0	1	0	4	3	4	1	1	0	3	1	2	4	4	4	5	2	4	6	4	7	3	1	3	4
6092	2	1	1	4	0	3	3	2	0	1	0	2	1	1	4	0	3	3	2	0	1	0	3	4	4	2	1	1	3	1	1	2	4	4	5	1	5	6	6	7	8	1	1	2
6093	2	1	1	4	0	3	3	2	0	1	0	2	1	1	4	0	3	3	2	0	1	0	2	4	4	2	1	1	1	1	1	3	4	4	4	4	1	-8	-8	-8	-8	2	3	4
6094	2	1	1	4	0	3	3	2	0	1	0	2	1	1	4	0	3	3	2	0	1	0	1	1	4	2	0	2	3	1	1	2	5	2	2	1	5	4	3	7	2	1	3	5
6095	2	1	1	4	0	3	3	2	0	1	0	2	1	1	4	0	3	3	2	0	1	0	4	3	4	9	4	5	1	2	1	2	1	2	2	2	4	1	1	3	1	1	3	1
6096	2	1	1	4	0	3	3	2	0	1	0	2	1	1	4	0	3	3	2	0	1	0	2	5	5	3	1	2	1	1	1	2	4	4	4	2	4	5	3	7	5	1	3	2
6097	2	1	1	4	0	3	3	2	0	1	0	2	1	1	4	0	3	3	2	0	1	0	4	2	5	2	1	1	1	1	1	2	5	5	1	1	5	4	6	7	3	2	3	1
6098	2	1	1	4	0	3	3	2	0	1	0	2	1	1	4	0	3	3	2	0	1	0	4	4	4	2	1	1	4	1	2	4	4	4	4	4	2	5	5	5	5	1	3	2
6099	2	1	1	4	0	3	3	2	0	1	0	2	1	1	4	0	3	3	2	0	1	0	4	4	2	2	1	1	3	2	2	4	4	4	2	2	2	3	3	3	3	1	3	2
6100	2	1	1	4	0	3	3	2	0	1	0	2	1	1	4	0	3	3	2	0	1	0	2	4	4	4	3	1	2	1	1	2	4	4	4	3	3	5	5	5	3	1	3	4
6101	2	1	1	4	0	3	3	2	0	1	0	2	1	1	4	0	3	3	2	0	1	0	5	5	4	2	1	1	4	2	3	4	2	3	2	2	1	10	10	7	9	2	3	2
6102	2	1	1	4	0	3	3	2	0	1	0	2	1	1	4	0	3	3	2	0	1	0	4	2	4	2	1	1	2	1	1	4	4	5	4	1	3	3	1	1	1	1	3	4
6103	2	1	1	4	0	3	3	2	0	1	0	2	1	1	4	0	3	3	2	0	1	0	2	4	4	2	1	1	1	1	1	2	4	4	3	2	3	5	4	5	4	1	3	4
6104	2	1	1	4	0	3	3	2	0	1	0	2	1	1	4	0	3	3	2	0	1	0	2	4	5	3	2	1	4	1	1	4	4	5	5	2	1	4	5	4	3	2	3	1
6105	2	1	1	4	0	3	3	2	0	1	0	2	1	1	4	0	3	3	2	0	1	0	2	4	4	2	1	1	3	1	1	1	2	4	1	2	4	4	2	4	2	2	3	5
6106	2	1	1	4	0	3	3	2	0	1	0	2	1	1	4	0	3	3	2	0	1	0	3	4	5	2	1	1	4	3	3	4	2	2	2	2	2	6	5	7	3	1	3	4
6107	2	1	1	4	0	3	3	2	0	1	0	2	1	1	4	0	3	3	2	0	1	0	2	3	4	2	1	1	1	1	1	2	2	2	3	3	4	4	3	4	2	1	3	4
6108	2	1	1	4	0	3	3	2	0	1	0	2	1	1	4	0	3	3	2	0	1	0	3	4	4	1	0	1	4	3	4	2	2	2	1	2	4	2	4	7	3	2	1	1
6109	2	1	1	4	0	3	3	2	0	1	0	2	1	1	4	0	3	3	2	0	1	0	5	4	4	2	1	1	1	1	1	4	4	4	2	2	4	5	3	5	2	1	3	2
6110	2	1	1	4	0	3	3	2	0	1	0	2	1	1	4	0	3	3	2	0	1	0	2	4	5	2	1	1	1	1	1	4	5	4	4	3	4	5	2	6	-8	1	3	2
6111	2	1	1	4	0	3	3	2	0	1	0	2	1	1	4	0	3	3	2	0	1	0	3	4	4	2	1	1	3	1	1	2	3	2	4	1	5	5	5	5	5	1	3	3
6112	2	1	1	4	0	3	3	2	0	1	0	2	1	1	4	0	3	3	2	0	1	0	2	5	5	2	1	1	2	2	2	4	4	4	2	2	5	5	4	6	4	1	3	4
6113	2	1	1	4	0	3	3	2	0	1	0	2	1	1	4	0	3	3	2	0	1	0	2	3	4	2	0	2	2	1	2	4	3	4	4	3	3	6	7	5	5	1	3	4
6114	2	1	1	4	0	3	3	2	0	1	0	2	1	1	4	0	3	3	2	0	1	0	2	2	2	3	3	0	1	1	-8	4	2	3	2	2	2	5	6	6	6	2	3	2
6115	2	1	0	4	0	3	3	2	0	1	0	2	1	0	4	0	3	3	2	0	1	0	2	1	4	2	1	1	1	1	1	2	5	5	5	2	5	5	5	6	5	1	3	2
6116	2	1	0	4	0	3	3	2	0	1	0	2	1	0	4	0	3	3	2	0	1	0	3	4	4	2	1	1	3	1	2	4	4	4	5	2	5	5	3	6	2	1	3	4
6117	2	1	0	4	0	3	3	2	0	1	0	2	1	0	4	0	3	3	2	0	1	0	3	4	4	2	1	1	2	2	3	4	3	2	2	2	2	5	4	7	8	1	3	2
6118	2	1	0	4	0	3	3	2	0	1	0	2	1	0	4	0	3	3	2	0	1	0	4	4	4	2	1	1	2	1	2	4	4	4	4	2	2	5	4	5	4	1	3	2
6119	2	1	0	4	0	3	3	2	0	1	0	2	1	0	4	0	3	3	2	0	1	0	3	3	4	2	1	1	3	1	1	4	4	2	4	1	1	7	5	8	4	1	3	2
6120	2	1	0	4	0	3	3	2	0	1	0	2	1	0	4	0	3	3	2	0	1	0	4	4	4	2	1	1	1	1	1	4	4	4	2	2	4	5	3	7	3	1	3	1
6121	2	1	0	4	0	3	3	2	0	1	0	2	1	0	4	0	3	3	2	0	1	0	4	4	4	2	1	1	3	1	1	4	4	4	3	4	4	6	5	6	5	1	3	2
6122	2	1	0	4	0	3	3	2	0	1	0	2	1	0	4	0	3	3	2	0	1	0	3	4	3	2	1	1	3	3	3	2	4	4	4	4	4	7	6	7	5	1	3	4
6123	2	1	0	4	0	3	3	2	0	1	0	2	1	0	4	0	3	3	2	0	1	0	2	3	2	3	2	1	1	1	1	4	2	2	2	2	3	2	1	2	1	2	3	2
6124	2	1	0	4	0	3	3	2	0	1	0	2	1	0	4	0	3	3	2	0	1	0	2	2	4	4	3	1	1	1	1	2	4	4	3	4	5	4	5	4	4	2	3	2
6125	2	1	0	4	0	3	3	2	0	1	0	2	1	0	4	0	3	3	2	0	1	0	2	3	4	2	0	2	2	1	1	2	4	4	4	2	2	5	3	8	3	1	3	2
6126	2	1	0	4	0	3	3	2	0	1	0	2	1	0	4	0	3	3	2	0	1	0	2	4	4	2	2	0	3	1	3	4	3	2	3	2	3	5	3	7	3	1	3	2
6127	2	1	0	4	0	3	3	2	0	1	0	2	1	0	4	0	3	3	2	0	1	0	4	2	3	2	1	1	3	3	1	2	3	3	3	3	3	7	7	6	6	1	3	4
6128	2	1	0	4	0	3	3	2	0	1	0	2	1	0	4	0	3	3	2	0	1	0	4	4	5	2	1	1	1	1	1	4	1	1	1	1	4	6	5	6	2	1	3	2
6129	2	1	0	4	0	3	3	2	0	1	0	2	1	0	4	0	3	3	2	0	1	0	5	2	5	2	1	1	5	1	1	2	1	1	5	1	5	5	3	5	2	1	3	5
6130	2	1	0	4	0	4	3	2	0	1	0	2	1	0	4	0	4	3	2	0	1	0	3	3	4	2	1	1	2	2	3	3	3	4	4	3	3	8	6	10	6	1	3	3
6131	2	1	0	4	0	4	3	2	0	1	0	2	1	0	4	0	4	3	2	0	1	0	2	3	2	2	1	1	3	1	3	4	4	2	4	1	3	1	5	7	5	2	3	3
6132	2	1	0	4	0	4	3	2	0	1	0	2	1	0	4	0	4	3	2	0	1	0	1	4	5	2	1	1	1	1	1	2	4	4	4	3	5	5	3	5	3	1	3	4
6133	2	1	0	4	0	4	3	2	0	1	0	2	1	0	4	0	4	3	2	0	1	0	3	3	4	2	1	1	3	1	1	4	4	2	4	2	4	5	3	6	3	2	3	3
6134	2	1	0	4	0	4	3	2	0	1	0	2	1	0	4	0	4	3	2	0	1	0	3	4	4	4	2	2	3	2	1	2	4	4	4	2	3	5	4	5	3	2	3	3
6135	2	1	0	4	0	4	3	2	0	1	0	2	1	0	4	0	4	3	2	0	1	0	1	3	4	3	1	2	1	1	1	2	4	2	4	1	5	6	1	9	3	1	3	1
6136	2	1	0	4	0	4	3	2	0	1	0	2	1	0	4	0	4	3	2	0	1	0	2	4	5	3	2	1	1	1	1	2	4	2	4	2	2	5	4	6	2	2	3	4
6137	2	1	0	4	0	4	3	2	0	1	0	2	1	0	4	0	4	3	2	0	1	0	4	4	4	2	1	1	2	1	1	2	2	2	2	1	5	5	3	7	6	1	3	4
6138	2	1	0	4	0	4	3	2	0	1	0	2	1	0	4	0	4	3	2	0	1	0	4	5	4	3	1	2	1	1	1	4	4	4	4	4	5	5	3	6	6	1	3	2
6139	2	1	0	4	0	4	3	2	0	1	0	2	1	0	4	0	4	3	2	0	1	0	4	4	4	2	1	1	2	1	1	2	4	4	4	4	4	5	5	5	5	1	3	4
6140	2	1	0	4	0	4	3	2	0	1	0	2	1	0	4	0	4	3	2	0	1	0	2	4	4	2	2	0	1	1	1	2	2	2	2	2	5	5	5	5	5	1	3	-8
6141	2	1	0	4	0	4	3	2	0	1	0	2	1	0	4	0	4	3	2	0	1	0	2	4	4	4	2	2	1	1	1	4	4	4	3	1	2	3	3	4	3	3	3	4
6142	2	1	0	4	0	4	3	2	0	1	0	2	1	0	4	0	4	3	2	0	1	0	3	2	4	2	1	1	1	1	1	1	4	4	3	3	4	5	3	7	2	1	3	3
6143	2	1	0	4	0	2	3	2	0	1	0	2	1	0	4	0	2	3	2	0	1	0	2	4	5	1	0	1	1	1	1	4	4	4	4	3	2	6	5	8	3	1	3	2
6144	2	1	0	4	0	2	3	2	0	1	0	2	1	0	4	0	2	3	2	0	1	0	1	4	4	4	1	3	1	1	1	1	5	5	4	3	2	2	1	2	1	2	3	2
6145	2	1	0	4	0	2	3	2	0	1	0	2	1	0	4	0	2	3	2	0	1	0	2	4	4	3	2	1	1	1	3	4	4	3	2	2	4	2	1	2	1	1	-8	4
6146	2	1	0	4	0	2	3	2	0	1	0	2	1	0	4	0	2	3	2	0	1	0	2	4	5	1	1	0	1	1	1	4	4	3	4	2	3	4	3	4	3	1	3	2
6147	2	1	0	4	0	2	3	2	0	1	0	2	1	0	4	0	2	3	2	0	1	0	4	2	2	2	1	1	1	1	1	2	4	4	4	1	4	-8	-8	-8	-8	2	3	2
6148	2	1	0	4	0	2	3	2	0	1	0	2	1	0	4	0	2	3	2	0	1	0	1	4	5	2	1	1	1	1	1	2	4	4	2	2	5	4	4	6	3	2	3	2
6149	2	1	0	4	0	2	3	2	0	1	0	2	1	0	4	0	2	3	2	0	1	0	2	5	5	7	4	3	1	1	1	1	1	1	1	1	5	3	2	3	2	1	3	1
6150	2	1	0	4	0	2	3	2	0	1	0	2	1	0	4	0	2	3	2	0	1	0	2	4	5	2	1	1	2	1	2	4	4	3	4	3	4	6	5	7	4	1	3	2
6151	2	1	0	4	0	2	3	2	0	1	0	2	1	0	4	0	2	3	2	0	1	0	4	4	5	2	1	1	4	1	1	2	1	2	5	1	4	2	2	3	8	2	3	1
6152	2	1	0	4	0	2	3	2	0	1	0	2	1	0	4	0	2	3	2	0	1	0	4	4	4	1	1	0	1	1	1	4	5	5	4	3	3	2	1	3	1	1	3	2
6153	2	1	0	4	0	2	3	2	0	1	0	2	1	0	4	0	2	3	2	0	1	0	4	3	4	2	1	1	1	1	1	4	4	4	3	3	2	5	6	5	5	1	3	3
6154	2	1	0	4	0	2	3	2	0	1	0	2	1	0	4	0	2	3	2	0	1	0	2	4	5	2	1	1	1	1	1	2	5	5	5	1	5	5	5	8	5	1	3	5
6155	2	1	0	4	0	2	3	2	0	1	0	2	1	0	4	0	2	3	2	0	1	0	1	4	4	2	1	1	1	1	1	2	4	2	4	4	3	5	2	7	3	1	3	3
6156	2	1	0	4	0	2	3	2	0	1	0	2	1	0	4	0	2	3	2	0	1	0	3	3	2	1	1	0	1	1	1	2	4	4	4	2	4	1	1	1	1	1	3	2
6157	2	1	0	4	0	2	3	2	0	1	0	2	1	0	4	0	2	3	2	0	1	0	4	5	4	2	1	1	3	1	1	4	5	2	4	2	4	6	4	7	3	1	3	3
6158	2	1	0	4	0	2	3	2	0	1	0	2	1	0	4	0	2	3	2	0	1	0	4	2	5	2	1	1	3	1	1	2	4	2	5	1	4	3	2	3	2	2	3	3
6159	2	1	0	4	0	2	3	2	0	1	0	2	1	0	4	0	2	3	2	0	1	0	2	4	5	2	1	1	2	1	1	4	4	4	2	2	4	5	4	6	4	2	3	2
6160	2	1	0	4	0	2	3	2	0	1	0	2	1	0	4	0	2	3	2	0	1	0	2	4	4	2	1	1	1	1	1	2	4	4	4	4	2	5	4	7	3	1	3	4
6161	2	1	0	4	0	2	3	2	0	1	0	2	1	0	4	0	2	3	2	0	1	0	4	4	4	2	1	1	1	1	1	2	4	4	2	2	5	5	4	5	3	1	3	2
6162	2	1	0	4	0	2	3	2	0	1	0	2	1	0	4	0	2	3	2	0	1	0	3	4	5	2	1	1	4	1	1	4	4	5	4	3	4	5	1	5	1	1	3	1
6163	2	1	0	4	0	2	3	2	0	1	0	2	1	0	4	0	2	3	2	0	1	0	4	4	4	2	1	1	1	1	1	2	4	3	3	1	4	6	4	7	3	1	3	1
6164	2	1	0	4	0	2	3	2	0	1	0	2	1	0	4	0	2	3	2	0	1	0	2	4	4	1	1	0	3	1	1	2	4	2	2	2	2	6	3	7	2	2	3	2
6165	2	1	0	4	0	2	3	2	0	1	0	2	1	0	4	0	2	3	2	0	1	0	4	3	4	1	0	1	3	1	1	2	4	2	5	2	3	2	1	3	1	2	3	2
6166	2	1	0	4	0	2	3	2	0	1	0	2	1	0	4	0	2	3	2	0	1	0	2	4	4	2	1	1	1	1	1	2	4	4	4	3	2	1	1	1	1	2	3	4
6167	2	1	0	4	0	2	3	2	0	1	0	2	1	0	4	0	2	3	2	0	1	0	3	3	3	2	1	1	1	1	1	2	4	4	4	5	2	5	3	5	1	1	1	1
6168	2	1	0	4	0	2	3	2	0	1	0	2	1	0	4	0	2	3	2	0	1	0	3	2	3	1	0	1	1	1	1	2	5	3	4	3	1	1	1	1	1	1	3	3
6169	2	1	0	4	0	2	3	2	0	1	0	2	1	0	4	0	2	3	2	0	1	0	4	1	4	2	1	1	4	4	1	4	4	4	4	2	3	4	3	4	3	2	3	4
6170	2	1	0	4	0	2	3	2	0	1	0	2	1	0	4	0	2	3	2	0	1	0	2	4	4	2	2	0	1	1	1	2	4	4	4	3	2	5	4	-8	2	2	3	2
6171	2	1	0	4	0	2	3	2	0	1	0	2	1	0	4	0	2	3	2	0	1	0	3	2	5	1	0	1	2	1	1	2	1	1	1	1	5	7	7	8	6	-8	1	3
6172	2	1	0	4	0	2	3	2	0	1	0	2	1	0	4	0	2	3	2	0	1	0	3	3	4	2	1	1	2	2	1	2	4	4	4	2	4	4	2	5	3	2	3	4
6173	2	1	0	4	0	2	3	2	0	1	0	2	1	0	4	0	2	3	2	0	1	0	3	4	5	3	3	0	2	1	3	2	4	4	4	2	4	2	2	2	1	1	3	4
6174	2	1	0	4	0	2	3	2	0	1	0	2	1	0	4	0	2	3	2	0	1	0	4	4	4	2	1	1	4	2	4	2	3	3	4	2	4	5	4	6	5	2	3	4
6175	2	1	0	4	0	2	3	2	0	1	0	2	1	0	4	0	2	3	2	0	1	0	2	2	4	1	1	0	2	2	2	4	2	2	3	2	4	5	5	7	5	2	3	2
6176	2	1	0	4	0	2	3	2	0	1	0	2	1	0	4	0	2	3	2	0	1	0	2	4	4	2	1	1	1	1	1	4	2	2	2	2	4	6	5	7	3	2	2	2
6177	2	1	0	4	0	2	3	2	0	1	0	2	1	0	4	0	2	3	2	0	1	0	3	4	5	2	0	2	2	2	3	3	2	2	2	1	4	6	6	5	5	2	1	2
6178	2	1	0	4	0	2	3	2	0	1	0	2	1	0	4	0	2	3	2	0	1	0	5	4	4	3	2	1	2	1	3	2	4	3	4	2	4	2	2	5	1	2	3	4
6179	2	1	0	4	0	2	3	2	0	1	0	2	1	0	4	0	2	3	2	0	1	0	2	4	4	2	1	1	2	1	2	4	2	2	2	2	5	5	3	5	2	2	3	4
6180	2	1	0	4	0	2	3	2	0	1	0	2	1	0	4	0	2	3	2	0	1	0	4	2	4	2	1	1	3	1	1	4	1	4	2	1	4	4	4	-8	3	2	1	3
6181	2	1	0	4	0	2	3	2	0	1	0	2	1	0	4	0	2	3	2	0	1	0	4	4	4	2	1	1	3	1	1	2	4	2	4	2	4	5	5	6	5	2	3	4
6182	2	1	0	4	0	2	3	2	0	1	0	2	1	0	4	0	2	3	2	0	1	0	2	5	5	2	1	1	1	1	1	4	3	2	2	2	4	5	3	7	2	1	3	2
6183	2	1	0	4	0	2	3	2	0	1	0	2	1	0	4	0	2	3	2	0	1	0	3	3	4	2	1	1	1	1	1	4	2	2	2	2	4	5	4	6	3	2	2	2
6184	2	1	0	4	0	2	3	2	0	1	0	2	1	0	4	0	2	3	2	0	1	0	2	4	4	2	1	1	2	1	3	4	2	3	2	2	4	5	4	7	4	2	3	4
6185	2	1	0	4	0	2	3	2	0	1	0	2	1	0	4	0	2	3	2	0	1	0	4	3	4	2	1	1	2	1	2	4	2	2	2	2	4	4	3	5	2	1	3	4
6186	2	1	0	4	0	2	3	2	0	1	0	2	1	0	4	0	2	3	2	0	1	0	3	4	4	4	2	2	1	1	1	4	5	4	4	2	2	5	3	6	2	1	3	3
6187	2	1	0	4	0	2	3	2	0	1	0	2	1	0	4	0	2	3	2	0	1	0	4	2	3	2	1	1	4	1	2	2	4	4	2	4	4	4	3	6	3	2	3	2
6188	2	1	0	4	0	2	3	2	0	1	0	2	1	0	4	0	2	3	2	0	1	0	2	2	4	2	1	1	2	1	1	4	4	2	4	3	4	3	3	3	2	2	2	2
6189	2	1	0	4	0	2	3	2	0	1	0	2	1	0	4	0	2	3	2	0	1	0	2	2	2	2	1	1	2	1	1	2	4	2	4	2	4	4	4	5	3	2	3	3
6190	2	1	0	4	0	2	3	2	0	1	0	2	1	0	4	0	2	3	2	0	1	0	2	4	4	2	1	1	1	1	1	2	4	4	4	2	4	5	3	7	2	2	3	2
6191	2	1	0	4	0	2	3	2	0	1	0	2	1	0	4	0	2	3	2	0	1	0	3	4	4	2	1	1	1	1	1	2	3	2	4	2	4	4	3	5	2	2	3	3
6192	2	1	0	4	0	2	3	2	0	1	0	2	1	0	4	0	2	3	2	0	1	0	3	4	4	1	1	0	4	2	2	2	4	3	2	1	4	6	6	7	5	2	3	3
6193	2	1	0	4	0	2	3	2	0	1	0	2	1	0	4	0	2	3	2	0	1	0	2	2	4	2	1	1	1	1	1	2	4	4	4	3	4	4	3	4	2	1	3	2
6194	2	1	0	4	0	2	3	2	0	1	0	2	1	0	4	0	2	3	2	0	1	0	4	4	4	2	1	1	1	1	1	2	4	3	3	4	3	4	3	4	2	2	3	4
6195	2	1	0	4	0	2	3	2	0	1	0	2	1	0	4	0	2	3	2	0	1	0	4	4	4	2	1	1	2	2	3	2	4	2	3	2	4	4	3	5	3	2	3	4
6196	2	1	0	4	0	2	3	2	0	1	0	2	1	0	4	0	2	3	2	0	1	0	4	2	4	2	1	1	1	1	1	4	2	2	4	1	5	2	3	5	3	2	3	4
6197	2	1	0	4	0	2	3	2	0	1	0	2	1	0	4	0	2	3	2	0	1	0	2	4	5	2	1	1	1	1	2	2	2	2	4	2	4	5	4	6	4	2	3	4
6198	2	1	0	4	0	2	3	2	0	1	0	2	1	0	4	0	2	3	2	0	1	0	2	4	4	4	2	2	1	1	1	4	4	4	4	2	5	3	2	3	2	1	3	2
6199	2	1	0	4	0	2	3	2	0	1	0	2	1	0	4	0	2	3	2	0	1	0	3	4	2	2	1	1	1	1	1	2	2	3	3	2	3	5	3	5	2	2	3	3
6200	2	1	0	4	0	2	3	2	0	1	0	2	1	0	4	0	2	3	2	0	1	0	3	3	5	5	3	2	1	1	1	1	4	2	3	2	2	5	3	-8	2	2	3	4
6201	2	1	0	4	0	2	4	2	0	1	0	2	1	0	4	0	2	4	2	0	1	0	2	4	4	2	1	1	1	1	1	2	4	4	4	3	4	5	4	6	4	2	3	4
6202	2	1	0	4	0	2	4	2	0	1	0	2	1	0	4	0	2	4	2	0	1	0	2	4	4	2	1	1	1	1	1	4	4	2	3	3	4	3	3	3	2	2	3	4
6203	2	1	0	4	0	2	4	2	0	1	0	2	1	0	4	0	2	4	2	0	1	0	4	2	5	2	1	1	1	1	1	3	5	4	5	3	2	5	7	5	2	2	3	1
6204	2	1	0	4	0	2	4	2	0	1	0	2	1	0	4	0	2	4	2	0	1	0	4	3	3	2	1	1	4	2	4	2	4	2	4	2	3	3	2	5	4	2	3	4
6205	2	1	0	4	0	2	4	2	0	1	0	2	1	0	4	0	2	4	2	0	1	0	3	4	4	2	1	1	2	1	1	4	3	2	2	2	3	4	3	5	3	2	3	4
6206	2	1	0	4	0	2	4	2	0	1	0	2	1	0	4	0	2	4	2	0	1	0	3	2	4	2	1	1	3	1	3	2	4	2	4	1	3	3	2	5	1	2	3	3
6207	2	1	0	4	0	2	4	2	0	1	0	2	1	0	4	0	2	4	2	0	1	0	2	3	4	3	2	1	1	1	1	3	4	3	2	2	4	5	6	5	3	1	3	2
6208	2	1	0	4	0	2	4	2	0	1	0	2	1	0	4	0	2	4	2	0	1	0	4	2	4	8	8	0	1	1	1	2	4	4	4	4	2	8	9	7	6	2	3	4
6209	2	1	0	4	0	2	4	2	0	1	0	2	1	0	4	0	2	4	2	0	1	0	2	4	4	4	1	3	1	1	1	2	4	4	4	2	3	1	1	1	1	2	3	4
6210	2	1	0	4	0	2	4	2	0	1	0	2	1	0	4	0	2	4	2	0	1	0	3	2	4	2	1	1	1	2	1	4	2	3	1	2	4	4	4	6	3	1	3	2
6211	2	1	0	4	0	2	4	2	0	1	0	2	1	0	4	0	2	4	2	0	1	0	3	3	4	2	1	1	1	1	1	2	2	1	4	1	3	4	4	5	2	2	3	3
6212	2	1	0	4	0	2	4	2	0	1	0	2	1	0	4	0	2	4	2	0	1	0	4	2	4	3	1	2	1	1	1	2	4	4	4	3	4	5	4	6	4	2	3	4
6213	2	1	0	4	0	2	4	2	0	1	0	2	1	0	4	0	2	4	2	0	1	0	4	2	4	2	1	1	2	1	3	4	2	2	2	2	4	4	3	6	3	1	3	2
6214	2	1	0	4	0	2	4	2	0	1	0	2	1	0	4	0	2	4	2	0	1	0	3	3	3	2	1	1	1	1	1	2	4	3	4	3	4	1	1	1	1	2	3	3
6215	2	1	0	4	0	2	4	2	0	1	0	2	1	0	4	0	2	4	2	0	1	0	4	4	4	5	4	1	1	1	1	4	4	4	2	2	4	5	4	6	2	2	3	2
6216	2	1	0	4	0	2	4	2	0	1	0	2	1	0	4	0	2	4	2	0	1	0	4	2	4	1	1	0	3	2	3	4	2	4	4	2	4	2	3	4	1	2	3	3
6217	2	1	0	4	0	2	4	2	0	1	0	2	1	0	4	0	2	4	2	0	1	0	4	4	4	2	1	1	1	2	-8	2	4	4	4	2	4	5	5	5	4	1	3	4
6218	2	1	0	4	0	2	4	2	0	1	0	2	1	0	4	0	2	4	2	0	1	0	2	4	4	2	97	97	1	1	1	2	4	4	3	3	4	5	4	6	3	2	3	2
6219	2	1	0	4	0	2	4	2	0	1	0	2	1	0	4	0	2	4	2	0	1	0	2	4	4	2	1	1	1	1	1	2	4	4	4	3	3	6	4	7	3	2	3	4
6220	2	1	0	4	0	2	4	2	0	1	0	2	1	0	4	0	2	4	2	0	1	0	2	4	4	2	2	0	1	1	1	2	4	4	4	2	4	5	5	5	5	2	3	4
6221	2	1	0	4	0	2	4	2	0	1	0	2	1	0	4	0	2	4	2	0	1	0	2	4	4	2	1	1	2	2	1	2	2	2	2	1	4	5	5	9	5	2	3	2
6222	2	1	0	4	0	2	4	2	0	1	0	2	1	0	4	0	2	4	2	0	1	0	4	4	4	2	1	1	3	3	3	4	4	4	3	3	3	4	5	5	4	1	3	3
6223	2	1	0	4	0	2	4	2	0	1	0	2	1	0	4	0	2	4	2	0	1	0	3	2	4	2	1	1	2	1	3	4	4	4	2	2	4	4	3	5	2	1	3	2
6224	2	1	0	4	0	2	5	2	0	1	0	2	1	0	4	0	2	5	2	0	1	0	2	3	5	2	1	1	1	1	1	4	3	2	2	2	4	5	4	6	3	2	3	3
6225	2	1	0	4	0	2	5	2	0	1	0	2	1	0	4	0	2	5	2	0	1	0	2	2	3	1	0	1	1	1	1	2	4	4	4	2	4	3	2	8	2	2	3	4
6226	2	1	0	4	0	2	5	2	0	1	0	2	1	0	4	0	2	5	2	0	1	0	3	2	4	2	1	1	2	1	3	2	2	2	2	2	4	8	7	9	5	2	1	2
6227	2	1	0	4	0	2	5	2	0	1	0	2	1	0	4	0	2	5	2	0	1	0	4	4	4	2	1	1	2	2	1	2	4	2	3	2	1	6	3	10	3	2	3	2
6228	2	1	0	4	0	2	5	2	0	1	0	2	1	0	4	0	2	5	2	0	1	0	4	4	4	2	1	1	1	1	1	2	4	4	4	4	2	4	3	4	3	2	3	4
6229	2	1	0	4	0	2	5	2	0	1	0	2	1	0	4	0	2	5	2	0	1	0	3	4	4	2	1	1	2	1	1	2	3	3	4	2	3	5	3	8	2	1	3	4
6230	2	1	0	4	0	2	5	2	0	1	0	2	1	0	4	0	2	5	2	0	1	0	4	2	4	2	1	1	2	2	2	2	4	2	2	2	4	5	4	5	5	2	3	3
6231	2	1	0	4	0	2	5	2	0	1	0	2	1	0	4	0	2	5	2	0	1	0	2	4	3	1	97	97	1	1	1	2	4	4	4	3	2	5	4	5	3	2	3	2
6232	2	1	0	4	0	2	5	2	0	1	0	2	1	0	4	0	2	5	2	0	1	0	4	4	4	2	1	1	1	3	1	2	2	3	2	2	3	6	5	7	4	3	3	2
6233	2	1	0	4	0	2	5	2	0	1	0	2	1	0	4	0	2	5	2	0	1	0	4	2	4	2	1	1	1	1	1	4	4	4	4	2	4	2	2	3	2	2	3	3
6234	2	1	0	4	0	2	5	2	0	1	0	2	1	0	4	0	2	5	2	0	1	0	2	4	4	2	1	1	3	1	3	4	2	2	2	1	4	6	5	7	4	2	1	4
6235	2	1	0	4	0	2	5	2	0	1	0	2	1	0	4	0	2	5	2	0	1	0	5	5	5	3	-2	-2	-8	-8	-8	4	4	5	5	-8	2	6	4	5	3	2	3	3
6236	2	1	0	4	0	2	5	2	0	1	0	2	1	0	4	0	2	5	2	0	1	0	5	5	5	5	2	3	1	1	1	4	5	5	2	3	5	5	3	7	2	1	3	2
6237	2	1	0	4	0	2	5	2	0	1	0	2	1	0	4	0	2	5	2	0	1	0	2	4	4	2	1	1	1	1	1	4	3	3	3	3	5	3	2	3	2	2	3	2
6238	2	1	0	4	0	2	5	2	0	1	0	2	1	0	4	0	2	5	2	0	1	0	2	4	4	4	2	2	1	1	1	2	4	4	4	2	4	1	1	1	1	2	3	4
6239	2	1	0	4	0	2	5	2	0	1	0	2	1	0	4	0	2	5	2	0	1	0	2	4	4	4	2	2	1	1	1	2	4	4	4	3	4	4	3	4	3	1	3	2
6240	2	1	0	4	0	2	6	2	0	1	0	2	1	0	4	0	2	6	2	0	1	0	2	3	5	2	1	1	2	2	1	4	4	2	3	2	5	5	5	5	4	2	3	4
6241	2	1	0	4	0	2	6	2	0	1	0	2	1	0	4	0	2	6	2	0	1	0	4	2	4	3	1	2	1	1	1	2	5	5	3	3	2	4	3	6	3	2	3	4
6242	2	1	0	4	0	2	6	2	0	1	0	2	1	0	4	0	2	6	2	0	1	0	4	2	3	1	1	0	3	1	1	2	2	3	4	3	2	5	3	8	3	2	3	4
6243	2	1	0	4	0	2	6	2	0	1	0	2	1	0	4	0	2	6	2	0	1	0	5	3	2	2	1	1	1	1	1	2	2	1	1	1	4	5	6	7	4	2	2	3
6244	2	1	0	4	0	2	6	2	0	1	0	2	1	0	4	0	2	6	2	0	1	0	4	2	5	2	1	1	1	1	1	1	2	2	2	2	4	7	6	7	6	2	1	4
6245	2	1	0	4	0	2	6	2	0	1	0	2	1	0	4	0	2	6	2	0	1	0	2	2	2	2	1	1	1	1	1	4	2	2	4	2	4	3	3	3	2	2	3	2
6246	2	1	0	4	0	2	6	2	0	1	0	2	1	0	4	0	2	6	2	0	1	0	4	4	4	2	1	1	1	1	1	2	4	2	4	2	4	3	3	3	3	2	3	3
6247	2	1	0	4	0	2	6	2	0	1	0	2	1	0	4	0	2	6	2	0	1	0	3	3	4	2	1	1	1	1	1	2	4	1	4	2	2	5	5	5	3	1	3	2
6248	2	1	0	4	0	2	6	2	0	1	0	2	1	0	4	0	2	6	2	0	1	0	2	4	4	2	1	1	1	1	1	2	4	4	4	2	2	1	1	1	1	2	3	4
6249	2	1	0	4	0	2	6	2	0	1	0	2	1	0	4	0	2	6	2	0	1	0	2	4	2	2	1	1	1	1	1	4	4	4	4	2	4	2	1	2	1	1	3	4
6250	2	1	0	4	0	2	6	2	0	1	0	2	1	0	4	0	2	6	2	0	1	0	5	3	4	3	0	3	2	2	1	2	5	4	3	2	4	5	5	5	1	1	3	4
6251	2	1	0	4	0	2	6	2	0	1	0	2	1	0	4	0	2	6	2	0	1	0	2	3	4	2	1	1	1	1	1	2	4	3	4	3	4	5	4	6	4	2	3	2
6252	2	1	0	4	0	2	6	2	0	1	0	2	1	0	4	0	2	6	2	0	1	0	2	2	5	2	1	1	2	2	2	4	4	4	2	2	4	2	1	2	1	2	3	4
6253	2	1	0	4	0	2	6	2	0	1	0	2	1	0	4	0	2	6	2	0	1	0	4	2	4	2	1	1	2	1	1	4	3	3	2	2	4	5	5	5	5	1	1	2
6254	2	1	0	4	0	2	6	2	0	1	0	2	1	0	4	0	2	6	2	0	1	0	2	4	4	2	1	1	1	1	1	3	4	2	3	2	3	5	4	6	3	2	3	2
6255	2	1	0	4	0	2	6	2	0	1	0	2	1	0	4	0	2	6	2	0	1	0	2	3	4	2	1	1	3	1	3	2	2	2	1	1	4	4	4	5	3	1	1	4
6256	2	1	0	4	0	2	6	2	0	1	0	2	1	0	4	0	2	6	2	0	1	0	2	4	4	2	1	1	2	1	1	4	3	4	4	2	4	4	3	5	2	1	3	2
6257	2	1	0	4	0	2	6	2	0	1	0	2	1	0	4	0	2	6	2	0	1	0	2	4	4	1	97	97	3	3	1	1	2	2	3	3	3	6	5	8	5	1	1	2
6258	2	1	0	4	0	2	6	2	0	1	0	2	1	0	4	0	2	6	2	0	1	0	3	3	3	2	1	1	5	1	1	2	4	4	4	3	3	5	4	5	5	2	3	3
6259	2	1	0	4	0	2	6	2	0	1	0	2	1	0	4	0	2	6	2	0	1	0	2	4	4	2	0	2	1	1	-8	2	5	2	2	1	3	6	4	7	2	2	3	2
6260	2	1	0	4	0	2	6	2	0	1	0	2	1	0	4	0	2	6	2	0	1	0	2	3	4	2	1	1	1	1	1	2	4	3	4	2	4	5	3	6	1	2	1	1
6261	2	1	0	4	0	2	6	2	0	1	0	2	1	0	4	0	2	6	2	0	1	0	2	4	3	2	1	1	2	1	2	1	4	2	2	2	4	4	3	5	3	-8	3	4
6262	2	1	0	4	0	2	6	2	0	1	0	2	1	0	4	0	2	6	2	0	1	0	4	4	5	3	2	1	1	1	1	2	4	4	4	3	3	7	5	8	5	2	3	4
6263	2	1	0	4	0	2	7	2	0	1	0	2	1	0	4	0	2	7	2	0	1	0	4	4	3	2	1	1	1	1	1	2	4	4	2	2	3	4	3	4	3	2	3	4
6264	2	1	0	4	0	2	7	2	0	1	0	2	1	0	4	0	2	7	2	0	1	0	2	4	4	1	1	0	1	1	1	2	4	1	1	1	2	4	3	5	2	2	2	2
6265	2	1	0	4	0	2	7	2	0	1	0	2	1	0	4	0	2	7	2	0	1	0	3	4	4	1	97	97	1	1	1	2	2	2	3	2	4	5	5	7	5	2	3	3
6266	2	1	0	4	0	2	7	2	0	1	0	2	1	0	4	0	2	7	2	0	1	0	3	4	4	2	1	1	1	1	1	2	4	4	4	3	4	5	4	7	3	1	3	3
6267	2	1	0	4	0	2	7	2	0	1	0	2	1	0	4	0	2	7	2	0	1	0	4	2	4	2	1	1	1	1	1	2	4	4	4	2	4	5	3	7	4	2	3	2
6268	2	1	0	4	0	2	7	2	0	1	0	2	1	0	4	0	2	7	2	0	1	0	2	4	4	2	1	1	2	1	3	2	3	3	2	3	3	5	4	7	4	2	2	4
6269	2	1	0	4	0	2	7	2	0	1	0	2	1	0	4	0	2	7	2	0	1	0	3	2	3	2	1	1	3	3	3	4	3	3	3	3	3	5	6	7	6	1	3	3
6270	2	1	0	4	0	3	7	2	0	1	0	2	1	0	4	0	3	7	2	0	1	0	4	4	4	2	1	1	2	1	1	4	4	4	3	3	2	5	4	6	3	2	3	3
6271	2	1	0	4	0	3	7	2	0	1	0	2	1	0	4	0	3	7	2	0	1	0	3	3	4	97	97	97	1	1	1	2	4	2	3	2	4	5	3	5	2	2	3	3
6272	2	1	0	4	0	3	7	2	0	1	0	2	1	0	4	0	3	7	2	0	1	0	3	2	2	2	1	1	1	1	1	1	4	4	3	3	4	3	6	3	6	2	1	3
6273	2	1	0	4	0	3	7	2	0	1	0	2	1	0	4	0	3	7	2	0	1	0	2	4	4	2	1	1	2	2	1	4	2	1	2	2	5	3	3	3	2	1	3	2
6274	2	1	0	4	0	3	7	2	0	1	0	2	1	0	4	0	3	7	2	0	1	0	2	4	4	2	1	1	2	1	1	2	2	2	2	2	3	5	3	6	2	2	3	2
6275	2	1	0	4	0	3	7	2	0	1	0	2	1	0	4	0	3	7	2	0	1	0	2	5	4	3	1	2	1	1	1	2	5	5	5	3	4	5	4	6	4	1	3	2
6276	2	1	0	4	0	3	7	2	0	1	0	2	1	0	4	0	3	7	2	0	1	0	4	4	4	2	1	1	2	2	1	3	4	4	4	2	4	5	5	5	4	2	3	2
6277	2	1	0	4	0	3	7	2	0	1	0	2	1	0	4	0	3	7	2	0	1	0	3	3	4	2	1	1	1	1	1	2	4	4	2	2	2	2	1	6	1	2	3	4
6278	2	1	0	4	0	3	7	2	0	1	0	2	1	0	4	0	3	7	2	0	1	0	4	2	4	4	2	2	4	4	1	4	5	1	5	1	5	5	5	5	5	1	1	5
6279	2	1	0	4	0	3	7	2	0	1	0	2	1	0	4	0	3	7	2	0	1	0	4	2	4	2	1	1	2	2	3	4	4	3	5	4	5	4	5	4	4	1	3	4
6280	2	1	0	4	0	3	7	2	0	1	0	2	1	0	4	0	3	7	2	0	1	0	3	4	4	1	1	0	2	1	1	2	3	3	4	2	4	4	3	6	2	2	3	4
6281	2	1	0	4	0	3	7	2	0	1	0	2	1	0	4	0	3	7	2	0	1	0	2	3	4	4	1	3	1	1	1	2	4	5	2	1	5	5	5	5	5	2	3	3
6282	2	1	0	4	0	3	8	2	0	1	0	2	1	0	4	0	3	8	2	0	1	0	2	2	4	2	1	1	2	2	1	4	2	2	2	2	4	5	3	5	3	1	2	2
6283	2	1	0	4	0	3	8	2	0	1	0	2	1	0	4	0	3	8	2	0	1	0	3	3	4	4	2	2	1	1	1	4	4	3	4	2	3	5	4	6	3	2	3	3
6284	2	1	0	4	0	3	8	2	0	1	0	2	1	0	4	0	3	8	2	0	1	0	4	2	5	3	1	2	3	1	1	4	4	4	5	2	5	5	7	8	4	2	3	4
6285	2	1	0	4	0	3	8	2	0	1	0	2	1	0	4	0	3	8	2	0	1	0	3	3	4	2	1	1	2	1	1	4	4	4	2	1	3	4	3	6	2	2	3	1
6286	2	1	0	4	0	3	8	2	0	1	0	2	1	0	4	0	3	8	2	0	1	0	4	2	3	2	1	1	4	2	1	4	4	2	4	2	4	5	5	6	5	2	3	2
6287	2	1	0	4	0	3	8	2	0	1	0	2	1	0	4	0	3	8	2	0	1	0	4	3	4	1	1	0	3	1	2	2	2	3	4	3	3	6	4	8	5	2	3	4
6288	2	1	0	4	0	3	8	2	0	1	0	2	1	0	4	0	3	8	2	0	1	0	2	4	4	4	2	2	2	2	2	2	3	4	3	3	4	5	4	6	4	2	3	2
6289	2	1	0	4	0	3	8	2	0	1	0	2	1	0	4	0	3	8	2	0	1	0	4	4	4	2	1	1	1	1	1	2	4	4	4	2	2	3	2	3	2	1	3	4
6290	2	1	0	4	0	3	8	2	0	1	0	2	1	0	4	0	3	8	2	0	1	0	2	4	4	2	1	1	1	1	1	2	4	4	4	2	2	5	4	5	4	2	3	4
6291	2	1	0	4	0	3	8	2	0	1	0	2	1	0	4	0	3	8	2	0	1	0	4	2	4	2	1	1	2	1	2	4	3	3	4	2	3	5	4	7	4	2	3	4
6292	2	1	0	4	0	3	8	2	0	1	0	2	1	0	4	0	3	8	2	0	1	0	2	3	2	2	1	1	1	1	1	1	3	4	3	3	4	4	3	4	2	2	3	3
6293	2	1	0	4	0	3	8	2	0	1	0	2	1	0	4	0	3	8	2	0	1	0	2	4	4	2	1	1	2	1	3	2	4	2	4	4	4	5	5	5	4	2	3	4
6294	2	1	0	4	0	3	8	2	0	1	0	2	1	0	4	0	3	8	2	0	1	0	2	2	5	2	1	1	1	1	1	3	2	3	1	2	4	6	5	6	3	-8	3	2
6295	2	1	0	4	0	3	8	2	0	1	0	2	1	0	4	0	3	8	2	0	1	0	2	2	4	2	1	1	2	1	3	4	3	2	2	2	4	7	5	8	5	1	1	4
6296	2	1	0	4	0	3	8	2	0	1	0	2	1	0	4	0	3	8	2	0	1	0	4	2	4	1	0	1	4	1	4	2	4	2	4	1	3	4	3	7	3	2	3	2
6297	2	1	0	4	0	3	8	2	0	1	0	2	1	0	4	0	3	8	2	0	1	0	1	3	4	2	1	1	4	1	1	2	1	1	1	1	4	5	5	6	5	2	3	3
6298	2	1	0	4	0	3	8	2	0	1	0	2	1	0	4	0	3	8	2	0	1	0	4	3	4	2	1	1	2	1	1	2	3	3	4	2	4	5	3	7	2	1	3	4
6299	2	1	0	4	0	3	8	2	0	1	0	2	1	0	4	0	3	8	2	0	1	0	4	2	2	2	1	1	2	1	1	4	2	4	4	3	5	3	2	3	3	1	3	4
6300	2	1	0	4	0	3	8	2	0	1	0	2	1	0	4	0	3	8	2	0	1	0	3	4	3	2	1	1	2	1	1	4	2	1	1	1	2	7	5	8	4	2	1	1
6301	2	1	0	4	0	3	8	2	0	1	0	2	1	0	4	0	3	8	2	0	1	0	4	2	4	2	1	1	2	1	1	2	5	5	5	2	4	4	4	4	3	2	3	4
6302	2	1	0	4	0	3	8	2	0	1	0	2	1	0	4	0	3	8	2	0	1	0	2	4	5	2	1	1	2	1	1	2	4	2	4	2	5	4	3	5	3	2	3	2
6303	2	1	0	4	0	3	8	2	0	1	0	2	1	0	4	0	3	8	2	0	1	0	2	4	4	2	1	1	1	1	1	1	2	2	2	2	2	5	4	6	3	2	3	3
6304	2	1	0	4	0	3	8	2	0	1	0	2	1	0	4	0	3	8	2	0	1	0	4	1	3	2	1	1	1	1	1	2	4	1	2	3	3	5	3	7	4	1	3	2
6305	2	1	0	4	0	3	8	2	0	1	0	2	1	0	4	0	3	8	2	0	1	0	2	3	4	2	1	1	1	1	1	2	4	3	2	2	3	4	3	6	2	2	3	4
6306	2	1	0	4	0	3	8	2	0	1	0	2	1	0	4	0	3	8	2	0	1	0	2	4	4	2	1	1	1	1	1	2	4	2	4	2	2	4	3	4	3	2	3	4
6307	2	1	0	4	0	3	8	2	0	1	0	2	1	0	4	0	3	8	2	0	1	0	4	4	4	2	1	1	2	1	3	4	2	2	2	2	4	5	3	6	2	2	3	2
6308	2	1	0	4	0	3	8	2	0	1	0	2	1	0	4	0	3	8	2	0	1	0	2	3	4	1	1	0	1	1	1	2	2	2	2	2	4	5	5	7	3	2	2	2
6309	2	1	0	4	0	3	8	2	0	1	0	2	1	0	4	0	3	8	2	0	1	0	4	4	4	2	1	1	3	1	1	4	4	4	4	3	4	5	4	6	4	1	3	4
6310	2	1	0	4	0	3	8	2	0	1	0	2	1	0	4	0	3	8	2	0	1	0	2	4	4	2	1	1	1	1	1	2	4	3	3	3	4	6	4	8	2	1	3	4
6311	2	1	0	4	0	3	8	2	0	1	0	2	1	0	4	0	3	8	2	0	1	0	-8	4	5	7	5	2	1	1	1	2	5	4	5	3	3	8	6	8	5	2	3	2
6312	2	1	0	4	0	3	8	2	0	1	0	2	1	0	4	0	3	8	2	0	1	0	3	4	4	2	1	1	1	1	1	2	4	4	4	2	3	3	3	3	3	2	3	3
6313	2	1	0	4	0	3	8	2	0	1	0	2	1	0	4	0	3	8	2	0	1	0	3	4	4	1	1	0	3	3	1	2	2	2	3	3	2	5	3	8	4	2	3	3
6314	2	1	0	4	0	3	8	2	0	1	0	2	1	0	4	0	3	8	2	0	1	0	3	4	4	2	1	1	1	1	1	2	4	4	3	3	3	1	1	1	1	1	3	2
6315	2	1	0	4	0	3	8	2	0	1	0	2	1	0	4	0	3	8	2	0	1	0	3	3	3	2	1	1	3	3	-8	2	4	4	4	3	3	1	2	1	1	2	3	5
6316	2	1	0	4	0	3	8	2	0	1	0	2	1	0	4	0	3	8	2	0	1	0	4	3	3	1	1	0	4	1	1	4	3	2	4	3	4	5	4	7	3	1	3	2
6317	2	1	0	4	0	3	8	2	0	1	0	2	1	0	4	0	3	8	2	0	1	0	4	1	4	2	1	1	1	1	1	4	2	2	2	2	4	4	4	5	4	2	3	4
6318	2	1	0	4	0	3	8	2	0	1	0	2	1	0	4	0	3	8	2	0	1	0	2	4	4	2	1	1	1	1	1	2	4	4	4	2	4	1	1	2	1	2	3	4
6319	2	1	0	4	0	3	8	2	0	1	0	2	1	0	4	0	3	8	2	0	1	0	2	5	5	2	1	1	1	1	1	2	4	2	4	2	4	5	4	6	3	1	3	2
6320	2	1	0	4	0	3	8	2	0	1	0	2	1	0	4	0	3	8	2	0	1	0	4	2	4	2	1	1	1	1	1	4	4	2	2	2	4	5	4	6	3	1	3	2
6321	2	1	0	4	0	3	8	2	0	1	0	2	1	0	4	0	3	8	2	0	1	0	2	4	4	2	1	1	1	1	1	4	2	2	4	2	5	6	5	7	2	2	3	5
6322	2	1	0	4	0	3	8	1	0	1	0	2	1	0	4	0	3	8	1	0	1	0	2	2	2	2	1	1	1	1	1	2	4	3	2	3	4	4	3	6	3	1	3	4
6323	2	1	0	4	0	3	8	1	0	1	0	2	1	0	4	0	3	8	1	0	1	0	3	2	4	0	0	0	1	1	1	1	1	1	1	2	4	1	1	1	1	2	3	1
6324	2	1	0	4	0	3	8	1	0	1	0	2	1	0	4	0	3	8	1	0	1	0	2	4	4	2	1	1	1	1	1	2	4	4	4	3	4	5	4	6	4	2	3	4
6325	2	1	0	4	0	3	8	1	0	1	0	2	1	0	4	0	3	8	1	0	1	0	4	4	4	2	1	1	1	1	1	2	2	2	2	2	2	1	1	2	1	2	3	2
6326	2	1	0	4	0	3	8	1	0	1	0	2	1	0	4	0	3	8	1	0	1	0	2	4	4	4	2	2	1	1	1	2	3	2	2	2	4	6	4	7	3	2	2	2
6327	2	1	0	4	0	3	8	1	0	1	0	2	1	0	4	0	3	8	1	0	1	0	4	4	4	2	1	1	3	3	-8	2	4	4	4	3	5	6	5	6	5	2	3	3
6328	2	1	0	4	0	3	8	1	0	1	0	2	1	0	4	0	3	8	1	0	1	0	2	2	5	3	1	2	1	1	1	2	2	4	2	2	5	5	4	6	4	1	3	4
6329	2	1	0	4	0	3	8	1	0	1	0	2	1	0	4	0	3	8	1	0	1	0	4	4	4	2	1	1	2	2	1	2	4	4	4	2	4	5	5	5	4	1	1	2
6330	2	1	0	4	0	3	8	1	0	1	0	2	1	0	4	0	3	8	1	0	1	0	2	4	3	2	1	1	1	1	1	4	4	3	4	1	3	5	4	6	3	2	3	2
6331	2	1	0	4	0	3	8	1	0	1	0	2	1	0	4	0	3	8	1	0	1	0	2	4	4	1	1	0	1	1	1	2	4	4	4	4	2	2	1	3	1	2	3	4
6332	2	1	0	4	0	3	8	1	0	1	0	2	1	0	4	0	3	8	1	0	1	0	5	2	4	-2	-2	-2	2	1	3	4	2	3	3	3	4	4	3	3	2	1	3	2
6333	2	1	0	4	0	3	8	1	0	1	0	2	1	0	4	0	3	8	1	0	1	0	2	4	4	2	1	1	1	1	1	2	4	4	4	3	2	4	3	5	2	1	3	2
6334	2	1	0	4	0	3	8	1	0	1	0	2	1	0	4	0	3	8	1	0	1	0	3	3	4	2	2	0	1	1	1	1	4	4	4	4	2	5	4	5	3	1	3	4
6335	2	1	0	4	0	3	8	1	0	1	0	2	1	0	4	0	3	8	1	0	1	0	4	4	5	2	1	1	3	1	1	2	2	4	3	2	3	5	4	6	4	2	3	4
6336	2	1	0	4	0	3	8	1	0	1	0	2	1	0	4	0	3	8	1	0	1	0	3	4	5	2	1	1	1	1	1	2	1	1	1	1	5	4	3	5	3	2	3	4
6337	2	1	0	4	0	3	9	1	0	1	0	2	1	0	4	0	3	9	1	0	1	0	3	4	4	97	97	97	1	1	1	2	4	4	4	3	2	6	5	7	4	1	3	4
6338	2	1	0	4	0	3	9	1	0	1	0	2	1	0	4	0	3	9	1	0	1	0	3	4	4	2	1	1	1	1	1	2	5	3	4	2	3	5	4	7	3	2	3	2
6339	2	1	0	4	0	3	9	1	0	1	0	2	1	0	4	0	3	9	1	0	1	0	2	3	4	2	1	1	2	1	1	2	5	4	1	1	4	5	4	7	3	2	3	3
6340	2	1	0	4	0	3	9	1	0	1	0	2	1	0	4	0	3	9	1	0	1	0	4	2	4	2	1	1	1	2	3	4	2	2	2	2	4	6	4	4	3	2	2	2
6341	2	1	0	4	0	3	9	1	0	1	0	2	1	0	4	0	3	9	1	0	1	0	2	3	4	2	1	1	1	1	1	4	4	4	4	3	5	5	3	6	3	1	3	4
6342	2	1	0	4	0	3	9	1	0	1	0	2	1	0	4	0	3	9	1	0	1	0	5	3	4	1	97	97	3	1	1	2	4	2	2	-8	3	4	3	5	2	2	3	-8
6343	2	1	0	4	0	3	9	1	0	1	0	2	1	0	4	0	3	9	1	0	1	0	3	4	4	2	1	1	1	1	1	2	4	4	4	3	4	5	4	6	4	1	3	4
6344	2	1	0	4	0	3	9	1	0	1	0	2	1	0	4	0	3	9	1	0	1	0	4	4	4	3	1	2	2	2	1	4	4	4	5	2	5	3	2	3	2	2	3	4
6345	2	1	0	4	0	3	9	1	0	1	0	2	1	0	4	0	3	9	1	0	1	0	4	2	4	2	1	1	3	1	1	2	2	2	2	1	2	5	3	8	3	2	3	4
6346	2	1	0	4	0	3	9	2	0	1	0	2	1	0	4	0	3	9	2	0	1	0	4	4	4	2	1	1	1	1	1	4	4	4	3	3	4	5	4	7	4	2	3	4
6347	2	1	0	4	0	3	9	2	0	1	0	2	1	0	4	0	3	9	2	0	1	0	2	3	4	2	1	1	1	1	1	2	4	1	2	1	4	5	3	6	2	2	3	3
6348	2	1	0	4	0	3	9	2	0	1	0	2	1	0	4	0	3	9	2	0	1	0	4	4	1	2	1	1	3	3	3	4	4	3	3	4	4	3	4	4	3	1	3	4
6349	2	1	0	4	0	3	9	2	0	1	0	2	1	0	4	0	3	9	2	0	1	0	4	2	4	2	1	1	2	1	3	4	2	2	2	2	4	5	4	5	3	2	3	2
6350	2	1	0	4	0	3	9	2	0	1	0	2	1	0	4	0	3	9	2	0	1	0	2	4	4	2	1	1	4	1	1	4	2	1	2	1	4	4	3	5	2	2	1	4
6351	2	1	0	4	0	3	9	2	0	1	0	2	1	0	4	0	3	9	2	0	1	0	2	2	1	2	2	0	1	2	1	4	4	4	3	-8	4	3	2	3	2	2	3	-8
6352	2	1	0	4	0	3	9	2	0	1	0	2	1	0	4	0	3	9	2	0	1	0	2	4	5	1	97	97	1	1	1	3	2	2	2	2	2	6	5	6	1	2	2	2
6353	2	1	0	4	0	3	9	2	0	1	0	2	1	0	4	0	3	9	2	0	1	0	4	2	2	2	2	0	1	2	1	2	4	4	4	3	2	4	5	4	3	2	3	5
6354	2	1	0	4	0	3	9	2	0	1	0	2	1	0	4	0	3	9	2	0	1	0	4	4	4	2	1	1	1	1	1	2	4	2	4	2	4	3	3	5	4	2	3	2
6355	2	1	0	4	0	3	9	2	0	1	0	2	1	0	4	0	3	9	2	0	1	0	3	-8	4	2	1	1	2	1	-8	2	4	4	2	4	4	4	4	4	3	1	3	4
6356	2	1	0	4	0	3	9	2	0	1	0	2	1	0	4	0	3	9	2	0	1	0	4	4	4	3	2	1	1	1	1	2	4	4	4	3	4	5	4	6	4	1	3	4
6357	2	1	0	4	0	3	9	2	0	1	0	2	1	0	4	0	3	9	2	0	1	0	2	4	4	2	1	1	2	1	1	2	4	2	4	1	4	5	5	6	5	2	3	4
6358	2	1	0	4	0	3	9	2	0	1	0	2	1	0	4	0	3	9	2	0	1	0	2	3	3	2	1	1	1	1	1	2	4	4	3	3	3	5	3	6	2	2	3	2
6359	2	1	0	4	0	3	9	2	0	1	0	2	1	0	4	0	3	9	2	0	1	0	2	3	4	2	1	1	1	1	1	1	3	2	2	2	3	6	5	6	3	2	3	3
6360	2	1	0	4	0	3	9	2	0	1	0	2	1	0	4	0	3	9	2	0	1	0	2	2	2	2	1	1	1	1	1	4	4	4	4	-8	4	3	2	3	2	1	1	2
6361	2	1	0	3	0	2	9	1	0	1	0	2	1	0	3	0	2	9	1	0	1	0	2	2	5	2	1	1	2	1	1	4	5	1	4	1	4	5	3	9	2	2	3	2
6362	2	1	0	3	0	2	9	1	0	1	0	2	1	0	3	0	2	9	1	0	1	0	4	2	4	2	2	0	2	1	3	2	5	4	3	2	4	5	4	5	4	2	3	4
6363	2	1	0	3	0	2	9	1	0	1	0	2	1	0	3	0	2	9	1	0	1	0	2	4	4	2	1	1	3	1	-8	2	5	4	3	2	3	5	4	6	1	1	3	2
6364	2	1	0	3	0	2	9	1	0	1	0	2	1	0	3	0	2	9	1	0	1	0	4	3	4	3	1	2	1	1	1	2	4	3	3	2	3	5	3	6	2	2	3	3
6365	2	1	0	3	0	2	9	1	0	1	0	2	1	0	3	0	2	9	1	0	1	0	4	4	4	2	1	1	1	1	3	1	5	4	4	1	4	5	5	5	4	2	3	4
6366	2	1	0	3	0	2	9	1	0	1	0	2	1	0	3	0	2	9	1	0	1	0	3	1	5	2	1	1	1	1	1	2	4	4	4	2	4	1	1	2	1	2	3	2
6367	2	1	0	3	0	2	9	1	0	1	0	2	1	0	3	0	2	9	1	0	1	0	2	3	2	97	97	97	1	1	1	3	3	3	5	3	1	3	1	3	1	2	3	2
6368	2	1	0	3	0	2	9	1	0	1	0	2	1	0	3	0	2	9	1	0	1	0	4	3	4	2	1	1	1	1	1	2	4	4	4	3	4	5	4	6	4	1	3	4
6369	2	1	0	3	0	2	9	1	0	1	0	2	1	0	3	0	2	9	1	0	1	0	4	3	4	2	1	1	3	1	1	2	3	3	2	3	3	5	4	7	4	2	3	4
6370	2	1	0	3	0	2	9	1	0	1	0	2	1	0	3	0	2	9	1	0	1	0	4	4	3	2	1	1	1	1	1	2	4	4	4	4	3	5	5	6	4	2	1	4
6371	2	1	0	3	0	2	9	1	0	1	0	2	1	0	3	0	2	9	1	0	1	0	2	2	5	2	1	1	2	1	3	4	2	2	2	2	4	4	3	5	3	2	1	2
6372	2	1	0	3	0	2	9	1	0	1	0	2	1	0	3	0	2	9	1	0	1	0	4	4	4	1	0	1	3	1	2	2	4	4	4	2	4	5	4	5	3	2	3	4
6373	2	1	0	3	0	2	9	1	0	1	1	2	1	0	3	0	2	9	1	0	1	1	3	2	4	2	1	1	1	1	3	2	2	1	1	1	5	5	5	5	2	2	3	3
6374	2	1	0	3	0	2	9	1	0	1	1	2	1	0	3	0	2	9	1	0	1	1	4	4	2	2	1	1	2	2	2	2	4	4	4	2	4	1	2	1	2	1	3	1
6375	2	1	0	3	0	2	9	1	0	1	1	2	1	0	3	0	2	9	1	0	1	1	3	3	3	2	1	1	1	1	1	2	5	4	4	4	3	1	1	1	1	2	3	3
6376	2	1	0	3	0	2	9	1	0	1	1	2	1	0	3	0	2	9	1	0	1	1	3	4	5	2	1	1	1	1	1	2	4	4	3	2	4	4	3	5	4	2	3	-8
6377	2	1	0	3	0	2	9	1	0	1	1	2	1	0	3	0	2	9	1	0	1	1	3	3	4	2	1	1	1	1	1	2	2	2	2	2	2	1	1	1	1	2	3	3
6378	2	1	0	3	0	2	9	1	0	1	1	2	1	0	3	0	2	9	1	0	1	1	2	4	4	1	0	1	1	1	1	2	4	4	4	3	4	1	1	10	1	2	3	2
6379	2	1	0	3	0	2	9	1	0	1	1	2	1	0	3	0	2	9	1	0	1	1	2	3	4	1	0	1	4	1	4	2	2	2	4	2	2	3	1	7	1	2	3	2
6380	2	1	0	3	0	2	9	1	0	1	1	2	1	0	3	0	2	9	1	0	1	1	3	3	5	2	1	1	3	1	3	2	2	1	1	1	5	5	8	8	8	2	3	2
6381	2	1	0	3	0	2	9	1	0	1	1	2	1	0	3	0	2	9	1	0	1	1	4	2	4	1	1	0	3	1	1	2	2	2	3	2	4	5	3	8	2	2	3	4
6382	2	1	0	3	0	2	9	1	0	1	1	2	1	0	3	0	2	9	1	0	1	1	2	4	4	4	1	3	1	1	1	2	4	4	4	2	2	5	4	5	5	2	3	4
6383	2	1	0	3	0	2	9	1	0	1	1	2	1	0	3	0	2	9	1	0	1	1	2	4	4	7	3	4	1	1	1	4	4	4	3	3	4	6	3	6	1	1	3	3
6384	2	1	0	3	0	2	9	1	0	1	1	2	1	0	3	0	2	9	1	0	1	1	2	4	4	2	1	1	2	1	3	2	2	2	3	2	5	5	4	6	3	2	3	4
6385	2	1	0	3	0	2	9	1	0	1	1	2	1	0	3	0	2	9	1	0	1	1	1	4	4	2	1	1	1	1	1	1	2	2	1	2	3	4	4	4	2	1	2	2
6386	2	1	0	3	0	2	9	1	0	1	1	2	1	0	3	0	2	9	1	0	1	1	4	2	4	3	1	2	1	1	1	2	4	4	4	2	4	7	5	8	3	1	3	3
6387	2	1	0	3	0	2	9	1	0	1	1	2	1	0	3	0	2	9	1	0	1	1	5	2	3	2	1	1	3	1	3	4	2	2	3	2	4	5	4	5	2	1	2	4
6388	2	1	0	3	0	2	9	1	0	1	1	2	1	0	3	0	2	9	1	0	1	1	4	3	5	5	1	4	1	1	1	3	3	2	2	1	4	5	3	6	2	2	3	-8
6389	2	1	0	3	0	2	9	1	0	1	1	2	1	0	3	0	2	9	1	0	1	1	4	2	2	2	1	1	1	1	1	2	2	4	4	3	2	5	4	6	3	2	3	3
6390	2	1	0	3	0	2	9	1	0	1	1	2	1	0	3	0	2	9	1	0	1	1	3	4	4	3	2	1	1	1	1	2	4	3	4	3	3	5	3	6	2	2	3	4
6391	2	1	0	3	0	2	9	1	0	1	1	2	1	0	3	0	2	9	1	0	1	1	5	4	4	2	1	1	4	4	1	4	4	2	3	3	5	3	3	4	2	2	3	4
6392	2	1	0	3	0	2	9	1	0	1	1	2	1	0	3	0	2	9	1	0	1	1	3	2	4	2	1	1	1	1	1	2	4	2	4	2	4	4	4	4	2	1	3	3
6393	2	1	0	3	0	2	9	1	0	1	1	2	1	0	3	0	2	9	1	0	1	1	2	2	3	1	0	1	3	1	3	2	2	2	4	2	3	5	3	7	3	2	3	4
6394	2	1	0	3	0	2	5	1	0	1	1	2	1	0	3	0	2	5	1	0	1	1	2	2	4	3	1	2	1	1	1	2	4	4	3	3	4	5	4	5	4	2	3	2
6395	2	1	0	3	0	2	5	1	0	1	1	2	1	0	3	0	2	5	1	0	1	1	4	2	4	2	1	1	1	1	3	2	4	5	4	3	4	6	5	6	4	2	3	3
6396	2	1	1	2	0	2	5	1	0	1	1	2	1	1	2	0	2	5	1	0	1	1	4	4	4	2	1	1	1	1	1	2	4	4	4	1	3	4	4	5	4	2	3	4
6397	2	1	1	2	0	2	5	1	0	1	1	2	1	1	2	0	2	5	1	0	1	1	2	4	4	2	1	1	1	1	-8	4	4	4	4	2	4	5	5	5	4	1	3	2
6398	2	1	1	2	0	2	5	1	0	1	1	2	1	1	2	0	2	5	1	0	1	1	2	4	4	2	1	1	1	1	1	2	4	4	4	2	4	2	1	2	1	2	3	4
6399	2	1	1	2	0	2	5	1	0	1	1	2	1	1	2	0	2	5	1	0	1	1	4	2	4	2	1	1	3	1	1	4	2	1	1	2	4	7	6	7	4	-8	1	1
6400	2	1	1	2	0	2	5	1	0	1	1	2	1	1	2	0	2	5	1	0	1	1	2	4	5	2	1	1	4	4	3	2	4	2	4	1	4	6	6	8	5	2	3	2
6401	2	1	1	2	0	2	5	1	0	1	1	2	1	1	2	0	2	5	1	0	1	1	3	2	4	2	1	1	2	2	-8	2	2	2	2	1	5	5	5	6	4	2	3	5
6402	2	1	1	2	0	2	5	1	0	1	1	2	1	1	2	0	2	5	1	0	1	1	4	4	3	2	1	1	1	1	1	4	4	4	5	4	3	4	2	5	1	2	1	3
6403	2	1	1	2	0	2	5	1	0	1	1	2	1	1	2	0	2	5	1	0	1	1	2	2	5	2	1	1	2	1	3	4	2	2	2	2	4	6	5	5	3	2	2	4
6404	2	1	1	2	0	2	5	1	0	1	1	2	1	1	2	0	2	5	1	0	1	1	2	4	4	2	2	0	1	1	1	2	4	4	4	2	4	4	3	4	3	2	3	4
6405	2	1	1	2	0	2	5	1	0	1	1	2	1	1	2	0	2	5	1	0	1	1	2	2	4	1	1	0	5	1	2	1	2	2	2	2	4	5	4	6	2	2	3	4
6406	2	1	1	2	0	2	5	1	0	1	1	2	1	1	2	0	2	5	1	0	1	1	5	4	5	2	1	1	1	1	1	1	3	4	2	2	5	7	7	8	2	2	1	3
6407	2	1	1	2	0	2	5	1	0	1	1	2	1	1	2	0	2	5	1	0	1	1	2	4	4	2	1	1	1	1	1	4	4	4	3	2	4	5	4	6	2	2	1	2
6408	2	1	1	2	0	2	5	1	0	1	1	2	1	1	2	0	2	5	1	0	1	1	2	4	4	1	97	97	4	1	1	2	3	2	2	1	3	3	1	7	2	2	3	2
6409	2	1	1	2	0	2	5	1	0	1	1	2	1	1	2	0	2	5	1	0	1	1	3	3	4	2	1	1	1	1	1	2	5	3	4	3	3	1	1	1	1	2	3	2
6410	2	1	1	2	0	2	5	1	0	1	1	2	1	1	2	0	2	5	1	0	1	1	3	3	4	2	1	1	1	1	1	1	4	3	4	3	3	5	4	6	3	2	3	2
6411	2	1	1	2	0	2	5	1	0	1	1	2	1	1	2	0	2	5	1	0	1	1	2	4	5	2	1	1	1	2	1	2	2	2	2	2	4	5	4	5	4	2	3	2
6412	2	1	1	2	0	2	5	1	0	1	1	2	1	1	2	0	2	5	1	0	1	1	2	2	4	2	1	1	1	1	1	2	4	4	4	4	4	1	1	1	1	2	3	4
6413	2	1	1	2	0	2	5	1	0	1	1	2	1	1	2	0	2	5	1	0	1	1	4	4	4	2	1	1	3	2	-8	2	4	4	3	2	4	4	3	5	3	1	3	4
6414	2	1	1	2	0	2	5	1	0	1	1	2	1	1	2	0	2	5	1	0	1	1	4	2	3	2	1	1	1	1	1	2	4	4	4	3	3	4	3	6	3	2	3	2
6415	2	1	1	2	0	2	5	1	0	1	1	2	1	1	2	0	2	5	1	0	1	1	3	2	4	3	2	1	1	1	1	2	4	4	4	3	4	6	4	7	4	2	3	4
6416	2	1	1	2	0	2	5	1	0	1	1	2	1	1	2	0	2	5	1	0	1	1	2	1	2	3	1	2	1	1	1	2	5	2	5	2	3	3	2	3	1	1	3	3
6417	2	1	1	2	0	2	5	1	0	1	1	2	1	1	2	0	2	5	1	0	1	1	3	3	5	2	1	1	1	1	1	1	4	2	3	2	3	4	3	5	3	2	3	3
6418	2	1	1	2	0	2	5	1	0	1	1	2	1	1	2	0	2	5	1	0	1	1	4	2	4	2	1	1	2	1	3	4	2	2	2	2	4	5	4	6	3	2	3	2
6419	2	1	1	2	0	2	5	1	0	1	1	2	1	1	2	0	2	5	1	0	1	1	3	2	4	2	1	1	2	1	3	2	4	4	4	1	5	3	1	4	1	2	3	3
6420	2	1	1	2	0	2	5	1	0	1	1	2	1	1	2	0	2	5	1	0	1	1	4	4	4	2	1	1	4	2	3	2	2	2	2	2	4	5	6	4	4	2	3	4
6421	2	1	1	2	0	2	5	1	0	1	1	2	1	1	2	0	2	5	1	0	1	1	3	4	4	2	1	1	1	1	1	2	4	4	3	2	4	5	4	7	3	1	3	2
6422	2	1	1	2	0	2	5	1	0	1	1	2	1	1	2	0	2	5	1	0	1	1	4	3	4	7	2	5	1	1	1	2	2	2	2	2	2	5	5	5	3	1	3	3
6423	2	1	1	2	0	2	5	1	0	1	1	2	1	1	2	0	2	5	1	0	1	1	2	3	4	2	1	1	2	1	3	4	3	3	3	3	5	5	3	7	2	2	3	4
6424	2	1	1	2	0	2	5	1	0	1	1	2	1	1	2	0	2	5	1	0	1	1	4	4	4	2	1	1	4	1	3	2	4	4	4	2	4	4	4	4	3	2	3	4
6425	2	1	1	2	0	2	5	1	0	1	1	2	1	1	2	0	2	5	1	0	1	1	3	3	4	5	2	3	2	2	2	2	4	4	4	2	4	5	5	6	4	2	3	2
6426	2	1	1	2	0	2	5	1	0	1	1	2	1	1	2	0	2	5	1	0	1	1	3	3	5	2	1	1	1	1	1	2	3	4	3	2	4	6	3	9	3	2	3	3
6427	2	1	1	2	0	2	5	1	0	1	1	2	1	1	2	0	2	5	1	0	1	1	2	4	4	2	1	1	1	1	1	2	4	2	2	2	2	5	3	7	2	2	3	3
6428	2	1	1	2	0	2	5	1	0	1	1	2	1	1	2	0	2	5	1	0	1	1	4	4	4	2	1	1	1	1	1	2	4	4	4	4	4	4	3	5	4	2	3	2
6429	2	1	1	2	0	2	5	1	0	1	1	2	1	1	2	0	2	5	1	0	1	1	4	3	4	2	1	1	1	1	1	2	4	3	4	2	3	5	3	7	2	2	3	2
6430	2	1	1	2	0	2	5	1	0	1	1	2	1	1	2	0	2	5	1	0	1	1	2	4	5	2	1	1	2	1	2	3	4	2	1	4	5	5	5	6	2	2	1	1
6431	2	1	1	2	0	2	5	1	0	1	1	2	1	1	2	0	2	5	1	0	1	1	3	3	4	2	1	1	2	1	2	4	4	3	4	2	3	5	4	6	3	2	3	3
6432	2	1	1	2	0	2	5	1	0	1	1	2	1	1	2	0	2	5	1	0	1	1	4	3	4	1	1	0	2	1	1	4	4	4	4	2	4	5	5	5	4	2	3	2
6433	2	1	1	2	0	2	5	1	0	1	1	2	1	1	2	0	2	5	1	0	1	1	3	4	4	2	1	1	1	1	1	2	2	2	3	2	3	5	4	7	3	2	3	3
6434	2	1	1	2	0	2	5	1	0	1	1	2	1	1	2	0	2	5	1	0	1	1	2	4	4	1	97	97	1	1	1	3	2	2	2	2	3	5	4	6	3	2	2	2
6435	2	1	1	2	0	2	5	1	0	1	1	2	1	1	2	0	2	5	1	0	1	1	2	2	2	3	2	1	1	1	1	4	4	3	3	2	4	4	2	6	2	1	3	4
6436	2	1	1	2	0	2	5	1	0	1	1	2	1	1	2	0	2	5	1	0	1	1	3	3	4	3	1	2	1	1	1	2	5	4	4	3	4	1	2	2	1	2	3	3
6437	2	1	1	2	0	2	5	1	0	1	1	2	1	1	2	0	2	5	1	0	1	1	3	4	5	2	1	1	1	1	1	1	4	4	4	2	4	5	5	5	4	2	3	4
6438	2	1	1	2	0	2	5	1	0	1	1	2	1	1	2	0	2	5	1	0	1	1	4	4	4	3	1	2	2	1	2	2	4	4	4	2	4	2	2	5	3	2	3	2
6439	2	1	1	2	0	2	5	1	0	1	1	2	1	1	2	0	2	5	1	0	1	1	2	4	5	2	1	1	1	1	1	2	2	2	4	2	2	6	5	6	5	2	3	4
6440	2	1	1	2	0	2	5	1	0	1	1	2	1	1	2	0	2	5	1	0	1	1	4	4	4	1	1	0	1	1	1	2	4	3	3	3	3	5	4	6	3	1	3	2
6441	2	1	1	2	0	2	5	1	0	1	1	2	1	1	2	0	2	5	1	0	1	1	4	2	4	2	1	1	1	1	1	4	4	4	4	3	4	3	3	3	3	2	3	3
6442	2	1	1	2	0	2	5	1	0	1	1	2	1	1	2	0	2	5	1	0	1	1	4	2	4	2	1	1	1	1	1	2	4	4	4	3	4	4	3	6	3	2	3	4
6443	2	1	1	2	0	2	5	1	0	1	1	2	1	1	2	0	2	5	1	0	1	1	2	4	5	2	1	1	1	1	3	2	5	2	4	2	5	5	3	8	3	2	3	2
6444	2	1	1	2	0	2	5	4	0	1	1	2	1	1	2	0	2	5	4	0	1	1	3	3	4	2	1	1	3	1	-8	4	5	3	5	3	3	3	2	4	2	2	3	3
6445	2	1	1	2	0	2	5	4	0	1	1	2	1	1	2	0	2	5	4	0	1	1	2	3	4	2	1	1	3	2	3	2	2	2	1	1	4	6	5	7	4	2	3	4
6446	2	1	1	2	0	2	5	4	0	1	1	2	1	1	2	0	2	5	4	0	1	1	1	4	4	2	1	1	3	1	1	4	5	5	2	1	5	4	2	7	1	1	3	1
6447	2	1	1	2	0	2	5	4	0	1	1	2	1	1	2	0	2	5	4	0	1	1	4	4	5	2	1	1	1	2	1	4	2	2	2	2	4	1	1	1	1	1	3	2
6448	2	1	1	2	0	2	5	4	0	1	1	2	1	1	2	0	2	5	4	0	1	1	4	3	4	2	1	1	2	1	1	4	2	2	2	2	4	5	5	6	4	1	3	2
6449	2	1	1	2	0	2	5	4	0	1	1	2	1	1	2	0	2	5	4	0	1	1	3	2	3	2	1	1	1	1	3	2	4	1	4	2	3	4	3	5	1	2	3	2
6450	2	1	1	2	0	2	5	4	0	1	1	2	1	1	2	0	2	5	4	0	1	1	3	2	3	0	0	0	4	3	3	4	4	3	4	3	3	4	2	7	2	2	3	2
6451	2	1	1	2	0	2	5	4	0	1	1	2	1	1	2	0	2	5	4	0	1	1	2	4	4	2	1	1	1	1	1	2	4	3	3	3	4	8	5	8	5	2	3	3
6452	2	1	1	2	0	2	5	4	0	1	1	2	1	1	2	0	2	5	4	0	1	1	4	3	4	2	1	1	3	1	3	4	1	2	1	4	5	7	5	7	3	2	3	1
6453	2	1	1	2	0	2	5	4	0	1	1	2	1	1	2	0	2	5	4	0	1	1	2	2	2	2	1	1	2	2	2	2	1	3	2	2	4	3	2	6	2	2	3	2
6454	2	1	1	2	0	2	5	5	0	1	1	2	1	1	2	0	2	5	5	0	1	1	4	4	4	2	1	1	5	2	1	2	5	4	4	2	4	6	5	9	5	2	3	4
6455	2	1	1	2	0	2	5	5	0	1	1	2	1	1	2	0	2	5	5	0	1	1	1	4	4	2	1	1	2	1	3	4	4	2	2	2	5	5	4	5	3	1	3	2
6456	2	1	1	2	0	2	5	5	0	1	1	2	1	1	2	0	2	5	5	0	1	1	2	4	4	2	1	1	1	1	1	2	4	4	5	4	5	6	5	7	4	1	3	4
6457	2	1	1	2	0	2	5	5	0	1	1	2	1	1	2	0	2	5	5	0	1	1	3	3	4	6	4	2	1	1	1	4	3	3	3	3	3	3	2	3	2	2	3	3
6458	2	1	1	2	0	2	5	5	0	1	1	2	1	1	2	0	2	5	5	0	1	1	3	4	4	2	1	1	1	1	1	2	4	4	3	3	3	4	2	6	2	2	3	4
6459	2	1	1	2	0	2	5	5	0	1	1	2	1	1	2	0	2	5	5	0	1	1	3	2	3	2	1	1	1	1	1	4	3	3	3	3	2	5	4	5	4	2	1	2
6460	2	1	1	2	0	2	5	5	0	1	1	2	1	1	2	0	2	5	5	0	1	1	2	3	3	2	1	1	1	1	1	2	4	3	4	2	3	1	1	1	1	2	3	2
6461	2	1	1	2	0	2	5	5	0	1	1	2	1	1	2	0	2	5	5	0	1	1	2	4	4	2	1	1	1	1	1	2	4	4	4	4	2	6	4	6	2	2	3	2
6462	2	1	1	2	0	2	5	5	0	1	1	2	1	1	2	0	2	5	5	0	1	1	2	2	4	2	1	1	1	1	1	4	4	2	2	1	5	4	3	5	3	2	3	4
6463	2	1	1	2	0	2	5	5	0	1	1	2	1	1	2	0	2	5	5	0	1	1	2	4	4	2	1	1	1	1	1	2	4	4	4	2	3	5	4	6	3	2	3	2
6464	2	1	1	2	0	2	5	5	0	1	1	2	1	1	2	0	2	5	5	0	1	1	2	2	4	2	1	1	1	1	1	4	4	4	4	2	5	4	3	4	2	2	3	3
6465	2	1	1	2	0	2	5	5	0	1	1	2	1	1	2	0	2	5	5	0	1	1	3	3	4	2	1	1	2	1	3	4	4	4	3	2	4	4	5	5	2	-8	3	2
6466	2	1	1	2	0	2	5	5	0	1	1	2	1	1	2	0	2	5	5	0	1	1	4	2	3	2	1	1	1	1	1	4	2	2	3	3	3	4	2	5	2	1	3	2
6467	2	1	1	2	0	2	5	5	0	1	1	2	1	1	2	0	2	5	5	0	1	1	4	3	4	2	1	1	2	1	1	2	5	2	2	2	1	2	1	3	1	2	3	5
6468	2	1	1	2	0	2	5	5	0	1	1	2	1	1	2	0	2	5	5	0	1	1	2	4	4	3	2	1	2	1	3	2	4	4	4	3	4	6	4	8	3	2	1	4
6469	2	1	1	2	0	2	5	5	0	1	1	2	1	1	2	0	2	5	5	0	1	1	2	2	4	2	1	1	2	2	2	4	2	2	2	2	4	5	5	6	5	2	1	4
6470	2	1	1	2	0	2	5	5	0	1	1	2	1	1	2	0	2	5	5	0	1	1	4	4	4	2	1	1	2	1	1	4	4	4	4	3	4	3	2	3	2	2	3	4
6471	2	1	1	2	0	2	5	5	0	1	1	2	1	1	2	0	2	5	5	0	1	1	3	2	3	2	1	1	1	1	1	2	5	1	5	3	2	6	6	6	4	2	3	3
6472	2	1	1	2	0	2	5	5	0	1	1	2	1	1	2	0	2	5	5	0	1	1	4	4	4	2	1	1	1	1	1	2	2	2	4	1	4	6	7	6	2	1	2	1
6473	2	1	1	2	0	2	5	5	0	1	1	2	1	1	2	0	2	5	5	0	1	1	4	4	4	3	2	1	1	1	1	2	4	4	5	2	5	5	6	-8	6	2	3	4
6474	2	1	1	2	0	2	5	5	0	1	1	2	1	1	2	0	2	5	5	0	1	1	4	2	3	2	2	0	3	1	1	2	4	4	4	3	3	4	2	8	3	2	3	2
6475	2	1	1	2	0	2	5	5	0	1	1	2	1	1	2	0	2	5	5	0	1	1	4	4	4	1	1	0	2	2	2	2	4	4	4	4	2	5	4	9	4	2	3	4
6476	2	1	1	2	0	2	5	5	0	1	1	2	1	1	2	0	2	5	5	0	1	1	2	4	5	2	1	1	2	2	3	2	4	4	4	2	2	5	4	5	4	2	3	4
6477	2	1	1	2	0	2	5	5	0	1	1	2	1	1	2	0	2	5	5	0	1	1	4	4	4	2	1	1	1	1	1	2	4	4	4	3	4	5	4	6	4	2	3	4
6478	2	1	1	2	0	2	5	5	0	1	1	2	1	1	2	0	2	5	5	0	1	1	4	2	3	2	1	1	2	1	3	4	4	3	3	2	4	5	6	5	3	1	3	4
6479	2	1	1	2	0	2	5	5	0	1	1	2	1	1	2	0	2	5	5	0	1	1	3	3	4	2	1	1	1	1	1	2	2	2	4	2	5	2	2	2	2	2	3	2
6480	2	1	1	2	0	2	5	5	0	1	1	2	1	1	2	0	2	5	5	0	1	1	2	4	4	2	1	1	1	1	3	2	2	2	4	2	4	5	5	5	3	1	2	4
6481	2	1	1	2	0	2	5	5	0	1	1	2	1	1	2	0	2	5	5	0	1	1	4	4	4	2	1	1	1	1	1	2	4	4	4	3	4	5	4	6	4	1	3	4
6482	2	1	1	2	0	2	5	5	0	1	1	2	1	1	2	0	2	5	5	0	1	1	3	2	2	2	1	1	1	1	1	2	4	4	4	3	3	4	3	5	3	2	3	4
6483	2	1	1	2	0	2	5	5	0	1	1	2	1	1	2	0	2	5	5	0	1	1	4	2	5	3	2	1	2	1	1	4	2	2	2	2	4	5	3	7	1	2	1	2
6484	2	1	1	2	0	2	5	5	0	1	1	2	1	1	2	0	2	5	5	0	1	1	2	4	5	2	1	1	1	1	3	2	2	2	2	1	4	4	3	6	3	2	3	3
6485	2	1	1	2	0	2	5	4	0	1	1	2	1	1	2	0	2	5	4	0	1	1	2	3	4	2	1	1	2	2	1	4	3	4	4	2	4	3	1	4	1	2	3	4
6486	2	1	1	2	0	2	5	4	0	1	1	2	1	1	2	0	2	5	4	0	1	1	2	4	4	2	1	1	2	1	-8	2	4	4	4	2	4	4	4	5	3	1	3	4
6487	2	1	1	2	0	2	5	4	0	1	1	2	1	1	2	0	2	5	4	0	1	1	4	3	4	2	1	1	2	1	3	2	3	2	3	3	3	4	5	6	4	1	3	3
6488	2	1	1	2	0	2	5	4	0	1	1	2	1	1	2	0	2	5	4	0	1	1	4	4	4	2	1	1	1	1	1	2	4	3	4	3	4	5	4	6	5	2	3	2
6489	2	1	1	2	0	2	5	4	0	1	1	2	1	1	2	0	2	5	4	0	1	1	2	3	4	1	1	0	1	1	1	2	4	4	4	4	3	5	4	5	2	2	3	2
6490	2	1	1	2	0	2	5	4	0	1	1	2	1	1	2	0	2	5	4	0	1	1	4	4	4	2	1	1	2	1	1	4	5	1	4	1	3	5	4	7	3	2	3	3
6491	2	1	1	2	0	2	5	4	0	1	1	2	1	1	2	0	2	5	4	0	1	1	3	4	4	2	1	1	1	1	1	4	4	2	2	1	5	5	5	5	5	1	1	4
6492	2	1	1	2	0	2	5	4	0	1	1	2	1	1	2	0	2	5	4	0	1	1	4	4	4	2	1	1	1	1	1	2	4	4	4	3	4	5	4	6	4	2	3	4
6493	2	1	1	2	0	2	5	4	0	1	1	2	1	1	2	0	2	5	4	0	1	1	4	2	2	2	1	1	1	1	1	4	4	4	4	-8	5	3	2	3	2	2	3	-8
6494	2	1	1	2	0	2	5	4	0	1	1	2	1	1	2	0	2	5	4	0	1	1	5	4	5	2	1	1	1	1	1	2	4	4	4	3	3	6	5	7	4	1	3	2
6495	2	1	1	2	0	2	5	4	0	1	1	2	1	1	2	0	2	5	4	0	1	1	2	2	4	2	1	1	1	1	1	4	2	2	4	1	4	4	4	4	3	1	1	4
6496	2	1	1	2	0	2	5	4	0	1	1	2	1	1	2	0	2	5	4	0	1	1	4	3	5	2	1	1	2	1	3	4	4	2	2	2	4	4	5	6	2	2	3	2
6497	2	1	1	2	0	2	5	4	0	1	1	2	1	1	2	0	2	5	4	0	1	1	3	4	4	2	1	1	1	1	1	4	4	4	3	4	4	5	4	6	4	1	3	1
6498	2	1	1	2	0	2	5	4	0	1	1	2	1	1	2	0	2	5	4	0	1	1	5	2	2	4	2	2	2	2	2	2	4	4	4	3	4	2	1	2	4	1	3	2
6499	2	1	1	2	0	2	5	4	0	1	1	2	1	1	2	0	2	5	4	0	1	1	4	3	4	2	1	1	2	2	1	2	4	2	2	2	5	4	2	8	3	1	3	2
6500	2	1	1	2	0	2	5	4	0	1	1	2	1	1	2	0	2	5	4	0	1	1	2	4	4	3	2	1	1	1	1	2	4	4	4	2	4	1	1	1	1	2	1	4
6501	2	1	1	2	0	2	5	4	0	1	1	2	1	1	2	0	2	5	4	0	1	1	2	3	4	2	1	1	1	1	1	2	2	2	1	2	4	5	4	7	3	2	3	2
6502	2	1	1	2	0	2	5	4	0	1	1	2	1	1	2	0	2	5	4	0	1	1	3	2	4	2	1	1	3	2	4	4	4	4	4	1	4	5	5	7	3	1	2	5
6503	2	1	1	2	0	2	5	4	0	1	1	2	1	1	2	0	2	5	4	0	1	1	4	4	4	4	2	2	1	1	1	4	2	4	2	3	4	3	2	3	2	2	3	4
6504	2	1	1	2	0	2	5	4	0	1	1	2	1	1	2	0	2	5	4	0	1	1	3	4	3	2	1	1	1	1	1	2	4	4	4	2	4	4	4	4	4	2	3	4
6505	2	1	1	2	0	2	5	4	0	1	1	2	1	1	2	0	2	5	4	0	1	1	4	3	4	2	1	1	3	2	-8	1	4	4	2	2	3	5	5	5	4	1	3	3
6506	2	1	1	2	0	2	5	4	0	1	1	2	1	1	2	0	2	5	4	0	1	1	2	4	4	4	2	2	1	1	1	2	4	4	4	4	4	1	1	1	1	2	3	4
6507	2	1	1	2	0	2	5	4	0	1	1	2	1	1	2	0	2	5	4	0	1	1	3	-8	3	3	2	1	1	1	1	4	4	4	5	3	3	3	2	4	1	2	3	2
6508	2	1	1	2	0	2	5	4	0	1	1	2	1	1	2	0	2	5	4	0	1	1	4	2	4	2	1	1	1	1	1	4	2	2	4	4	5	1	1	3	1	2	3	4
6509	2	1	1	2	0	2	5	4	0	1	1	2	1	1	2	0	2	5	4	0	1	1	4	2	3	-2	-2	-2	1	1	1	4	1	1	1	1	5	5	5	7	4	2	3	2
6510	2	1	1	2	0	2	5	4	0	1	1	2	1	1	2	0	2	5	4	0	1	1	3	2	4	2	1	1	1	1	-8	2	5	1	5	2	4	5	3	5	1	2	3	2
6511	2	1	1	2	0	2	5	4	0	1	1	2	1	1	2	0	2	5	4	0	1	1	2	3	4	1	97	97	3	1	3	4	2	1	2	1	5	5	4	7	3	2	3	4
6512	2	1	1	2	0	2	5	4	0	1	1	2	1	1	2	0	2	5	4	0	1	1	4	4	5	2	1	1	2	2	3	2	1	1	2	1	2	5	5	6	4	2	1	5
6513	2	1	1	2	0	2	5	4	0	1	1	2	1	1	2	0	2	5	4	0	1	1	2	4	5	4	2	2	1	1	1	3	4	4	2	2	3	5	3	7	1	1	3	2
6514	2	1	1	2	0	2	5	4	0	1	1	2	1	1	2	0	2	5	4	0	1	1	3	3	4	2	1	1	3	1	1	2	2	1	1	1	1	5	3	-8	1	1	1	4
6515	2	1	1	2	0	2	5	4	0	1	1	2	1	1	2	0	2	5	4	0	1	1	4	2	4	2	2	0	5	1	1	2	5	1	5	3	3	4	3	5	1	2	3	2
6516	2	1	1	2	0	2	5	4	0	1	1	2	1	1	2	0	2	5	4	0	1	1	4	1	4	2	1	1	3	3	3	2	3	3	4	4	5	1	1	1	1	2	3	3
6517	2	1	1	2	0	2	5	4	0	1	1	2	1	1	2	0	2	5	4	0	1	1	1	2	5	2	1	1	4	1	1	4	1	4	1	1	5	4	2	6	2	3	3	1
6518	2	1	1	2	0	2	5	4	0	1	1	2	1	1	2	0	2	5	4	0	1	1	2	4	4	2	1	1	2	1	1	2	4	3	2	2	2	6	2	9	2	2	3	2
6519	2	1	1	2	0	2	5	4	0	1	1	2	1	1	2	0	2	5	4	0	1	1	3	4	4	2	1	1	1	1	1	2	4	3	2	3	3	4	3	7	2	2	3	2
6520	2	1	1	2	0	2	5	4	0	1	1	2	1	1	2	0	2	5	4	0	1	1	2	3	4	2	1	1	1	1	1	2	2	1	2	2	3	4	3	3	3	3	2	3
6521	2	1	1	2	0	2	5	4	0	1	1	2	1	1	2	0	2	5	4	0	1	1	5	4	5	2	1	1	1	1	1	4	4	3	4	4	3	5	3	7	2	2	3	1
6522	2	1	1	2	0	2	5	4	0	1	1	2	1	1	2	0	2	5	4	0	1	1	3	3	4	2	1	1	3	2	3	2	3	4	3	2	4	6	4	8	5	2	3	4
6523	2	1	1	2	0	2	5	4	0	1	1	2	1	1	2	0	2	5	4	0	1	1	4	4	4	2	1	1	1	1	1	4	4	2	4	3	4	3	3	3	3	2	3	3
6524	2	1	1	2	0	2	5	4	0	1	1	2	1	1	2	0	2	5	4	0	1	1	3	4	4	2	1	1	2	2	-8	4	2	2	4	2	5	6	6	6	5	2	3	2
6525	2	1	1	2	0	2	5	4	0	1	1	2	1	1	2	0	2	5	4	0	1	1	2	4	3	2	2	0	1	1	1	2	5	2	4	3	3	4	3	5	1	2	3	2
6526	2	1	1	2	0	2	5	4	0	1	1	2	1	1	2	0	2	5	4	0	1	1	2	2	3	2	1	1	1	1	1	4	4	4	2	2	4	5	4	7	4	2	3	4
6527	2	1	1	2	0	2	5	4	0	1	1	2	1	1	2	0	2	5	4	0	1	1	4	2	4	3	2	1	1	1	1	2	4	3	5	2	2	4	3	6	3	2	2	4
6528	2	1	1	2	0	2	5	4	0	1	1	2	1	1	2	0	2	5	4	0	1	1	3	4	4	2	1	1	3	1	2	2	5	3	2	2	5	7	6	9	7	3	3	3
6529	2	1	1	2	0	2	5	4	0	1	1	2	1	1	2	0	2	5	4	0	1	1	5	2	4	2	1	1	3	1	1	2	2	4	1	1	5	5	2	6	2	2	3	4
6530	2	1	1	2	0	2	5	4	0	1	1	2	1	1	2	0	2	5	4	0	1	1	2	4	4	2	1	1	1	1	4	2	2	2	2	2	4	5	4	6	4	2	1	2
6531	2	1	1	2	0	2	5	4	0	1	1	2	1	1	2	0	2	5	4	0	1	1	2	4	5	3	2	1	1	1	1	2	4	4	3	2	4	2	2	3	2	2	3	4
6532	2	1	1	2	0	2	5	4	0	1	1	2	1	1	2	0	2	5	4	0	1	1	2	3	5	2	1	1	1	1	1	2	4	4	2	3	2	6	5	7	3	2	3	2
6533	2	1	1	2	0	2	5	4	0	1	1	2	1	1	2	0	2	5	4	0	1	1	4	4	4	1	0	1	4	2	4	2	2	4	4	2	4	5	5	8	5	2	3	4
6534	2	1	1	2	0	2	5	4	0	1	1	2	1	1	2	0	2	5	4	0	1	1	4	4	4	-2	-2	-2	1	1	1	4	2	2	2	2	5	3	2	5	2	2	3	2
6535	2	1	1	2	0	2	5	4	0	1	1	2	1	1	2	0	2	5	4	0	1	1	2	3	5	2	1	1	1	1	1	2	5	2	4	2	3	5	4	6	1	2	3	4
6536	2	1	1	2	0	2	5	4	0	1	1	2	1	1	2	0	2	5	4	0	1	1	2	2	4	2	1	1	3	1	1	2	4	4	4	4	4	6	6	8	6	2	3	4
6537	2	1	1	2	0	2	5	4	0	1	1	2	1	1	2	0	2	5	4	0	1	1	4	3	4	3	2	1	1	1	1	2	4	4	4	3	4	5	4	6	4	1	3	4
6538	2	1	1	2	0	2	5	4	0	1	1	2	1	1	2	0	2	5	4	0	1	1	4	3	4	6	3	3	1	1	1	2	4	4	4	3	3	5	4	6	3	2	3	2
6539	2	1	1	2	0	2	5	4	0	1	1	2	1	1	2	0	2	5	4	0	1	1	3	4	4	3	2	1	1	1	1	2	4	4	3	4	3	6	3	7	2	2	3	2
6540	2	1	1	2	0	2	5	4	0	1	1	2	1	1	2	0	2	5	4	0	1	1	4	4	4	2	1	1	3	1	-8	4	2	1	4	2	3	4	3	5	2	2	3	2
6541	2	1	1	2	0	2	5	4	0	1	1	2	1	1	2	0	2	5	4	0	1	1	2	4	4	0	0	0	1	1	1	2	4	2	4	3	4	3	2	4	2	1	3	2
6542	2	1	1	2	0	2	5	4	0	1	1	2	1	1	2	0	2	5	4	0	1	1	2	4	5	2	1	1	1	1	1	2	4	2	4	2	4	3	2	6	2	2	3	4
6543	2	1	1	2	0	2	5	4	0	1	1	2	1	1	2	0	2	5	4	0	1	1	4	2	4	1	1	0	3	1	2	2	2	3	4	2	3	5	4	8	4	2	3	4
6544	2	1	1	2	0	2	5	4	0	1	1	2	1	1	2	0	2	5	4	0	1	1	2	4	5	3	1	2	1	1	1	2	4	4	4	2	4	5	5	5	5	2	3	4
6545	2	1	1	2	0	2	5	4	0	1	1	2	1	1	2	0	2	5	4	0	1	1	2	4	4	2	1	1	1	1	1	2	4	3	2	2	3	5	3	7	2	2	3	2
6546	2	1	1	2	0	2	5	4	0	1	1	2	1	1	2	0	2	5	4	0	1	1	2	4	5	2	1	1	1	1	1	2	4	4	4	1	4	5	4	6	4	2	3	4
6547	2	1	1	2	0	2	5	4	0	1	1	2	1	1	2	0	2	5	4	0	1	1	4	4	4	2	1	1	2	2	3	2	4	4	4	2	4	4	4	5	4	2	3	4
6548	2	1	1	2	0	2	5	4	0	1	1	2	1	1	2	0	2	5	4	0	1	1	2	4	4	2	1	1	2	1	-8	2	4	4	4	4	2	5	5	5	3	2	3	2
6549	2	1	1	2	0	2	5	4	0	1	1	2	1	1	2	0	2	5	4	0	1	1	4	3	4	2	1	1	1	1	1	2	4	4	4	3	4	4	3	6	3	2	3	4
6550	2	1	1	2	0	2	5	4	0	1	1	2	1	1	2	0	2	5	4	0	1	1	3	2	4	1	97	97	1	1	1	4	4	4	4	4	3	5	4	6	2	2	2	2
6551	2	1	1	2	0	2	5	4	0	1	1	2	1	1	2	0	2	5	4	0	1	1	2	2	3	2	1	1	3	1	1	2	5	4	4	3	1	2	2	2	1	1	3	3
6552	2	1	1	2	0	2	5	4	0	1	1	2	1	1	2	0	2	5	4	0	1	1	5	4	4	3	2	1	3	3	3	2	4	4	5	3	4	5	4	5	4	2	3	4
6553	2	1	1	2	0	2	5	4	0	1	1	2	1	1	2	0	2	5	4	0	1	1	2	4	4	2	1	1	1	1	1	2	4	4	4	2	4	5	4	5	5	2	3	4
6554	2	1	1	2	0	2	5	4	0	1	1	2	1	1	2	0	2	5	4	0	1	1	4	3	3	1	0	1	3	1	3	2	5	5	5	3	3	2	1	2	1	2	3	3
6555	2	1	1	2	0	2	5	4	0	1	1	2	1	1	2	0	2	5	4	0	1	1	4	4	4	2	1	1	1	1	3	2	2	2	4	2	5	4	3	5	1	2	1	2
6556	2	1	1	2	0	2	5	4	0	1	1	2	1	1	2	0	2	5	4	0	1	1	4	3	4	2	2	0	1	1	1	2	4	2	2	2	4	5	4	5	5	2	3	4
6557	2	1	1	2	0	2	5	4	0	1	1	2	1	1	2	0	2	5	4	0	1	1	4	3	4	2	1	1	2	1	1	2	2	2	2	1	5	5	5	6	4	2	3	3
6558	2	1	1	2	0	2	5	4	0	1	1	2	1	1	2	0	2	5	4	0	1	1	2	4	5	2	1	1	1	1	1	2	2	2	3	2	4	4	3	5	3	2	1	4
6559	2	1	1	2	0	2	5	4	0	1	1	2	1	1	2	0	2	5	4	0	1	1	2	4	4	2	1	1	1	1	1	2	3	3	3	3	4	4	3	6	3	2	3	4
6560	2	1	1	2	0	2	5	4	0	1	1	2	1	1	2	0	2	5	4	0	1	1	3	3	3	2	1	1	1	1	1	2	2	2	5	3	3	2	2	2	1	2	3	3
6561	2	1	1	2	0	2	5	4	0	1	1	2	1	1	2	0	2	5	4	0	1	1	4	3	3	2	1	1	1	2	1	4	4	4	3	2	2	4	3	5	1	1	3	3
6562	2	1	1	2	0	2	5	4	0	1	1	2	1	1	2	0	2	5	4	0	1	1	4	2	4	2	1	1	2	1	1	4	3	2	2	2	5	5	3	6	2	1	2	2
6563	2	1	1	2	0	2	5	4	0	1	1	2	1	1	2	0	2	5	4	0	1	1	2	4	4	2	1	1	1	1	1	2	4	4	4	2	4	5	3	8	8	2	3	2
6564	2	1	1	2	0	2	5	4	0	1	1	2	1	1	2	0	2	5	4	0	1	1	2	2	5	2	1	1	1	1	3	1	1	1	1	1	5	4	4	6	4	2	3	5
6565	2	1	1	2	0	2	5	4	0	1	1	2	1	1	2	0	2	5	4	0	1	1	2	4	4	2	1	1	1	1	1	2	4	4	4	2	2	5	5	5	5	1	3	4
6566	2	1	1	2	0	2	5	4	0	1	1	2	1	1	2	0	2	5	4	0	1	1	2	3	4	2	1	1	3	1	1	2	4	4	4	3	3	5	4	6	4	2	3	4
6567	2	1	1	2	0	2	5	4	0	1	1	2	1	1	2	0	2	5	4	0	1	1	4	3	4	2	1	1	3	1	1	2	4	3	3	3	3	4	5	5	2	2	3	2
6568	2	1	1	2	0	2	5	4	0	1	1	2	1	1	2	0	2	5	4	0	1	1	2	4	4	2	1	1	2	1	-8	2	4	1	4	1	4	4	4	5	4	2	3	4
6569	2	1	1	2	0	2	5	4	0	1	1	2	1	1	2	0	2	5	4	0	1	1	2	4	4	2	2	0	1	1	1	2	3	3	-8	3	3	6	4	7	4	1	3	2
6570	2	1	1	2	0	2	5	4	0	1	1	2	1	1	2	0	2	5	4	0	1	1	2	4	2	3	1	2	1	1	1	2	4	4	4	4	4	1	1	1	1	2	3	4
6571	2	1	1	2	0	2	5	4	0	1	1	2	1	1	2	0	2	5	4	0	1	1	4	3	4	2	1	1	1	1	1	1	4	4	5	2	3	7	6	8	5	1	3	2
6572	2	1	1	2	0	2	5	4	0	1	1	2	1	1	2	0	2	5	4	0	1	1	3	2	4	2	1	1	4	1	1	2	2	2	5	2	5	5	5	7	5	2	3	2
6573	2	1	1	2	0	2	5	4	0	1	1	2	1	1	2	0	2	5	4	0	1	1	3	2	4	3	2	1	1	1	1	2	2	3	2	2	4	6	4	8	4	2	3	2
6574	2	1	1	2	0	2	5	4	0	1	1	2	1	1	2	0	2	5	4	0	1	1	3	4	4	2	1	1	1	1	1	2	4	2	2	2	4	6	5	8	3	1	3	2
6575	2	1	1	2	0	2	5	4	0	1	1	2	1	1	2	0	2	5	4	0	1	1	4	2	4	4	1	3	1	1	-8	2	5	2	4	2	3	3	4	5	1	2	2	1
6576	2	1	1	2	0	2	5	4	0	1	1	2	1	1	2	0	2	5	4	0	1	1	5	4	5	4	1	3	2	1	1	4	4	2	3	2	4	5	3	6	1	1	3	2
6577	2	1	1	2	0	2	5	4	0	1	1	2	1	1	2	0	2	5	4	0	1	1	4	2	4	2	1	1	1	1	1	4	4	3	4	4	2	5	6	7	5	2	2	4
6578	2	1	1	2	0	2	5	4	0	1	1	2	1	1	2	0	2	5	4	0	1	1	3	4	4	2	1	1	2	1	5	4	4	1	4	2	3	4	3	5	2	2	3	2
6579	2	1	1	2	0	2	5	4	0	1	1	2	1	1	2	0	2	5	4	0	1	1	5	3	2	1	1	0	1	1	1	2	4	4	4	3	3	1	1	1	1	2	3	3
6580	2	1	1	2	0	2	5	4	0	1	1	2	1	1	2	0	2	5	4	0	1	1	3	2	5	2	1	1	1	1	1	2	5	4	5	-8	3	1	2	2	1	1	3	4
6581	2	1	1	2	0	2	5	4	0	1	1	2	1	1	2	0	2	5	4	0	1	1	2	3	4	2	1	1	1	1	1	2	4	3	4	2	4	5	4	7	3	2	3	3
6582	2	1	1	2	0	2	5	4	0	1	1	2	1	1	2	0	2	5	4	0	1	1	4	4	4	2	1	1	2	1	3	4	2	2	2	2	4	5	4	5	2	2	3	2
6583	2	1	1	2	0	1	5	3	0	1	1	2	1	1	2	0	1	5	3	0	1	1	2	2	3	-3	-3	-3	2	1	1	4	1	1	2	1	5	5	4	7	5	2	3	4
6584	2	1	1	2	0	1	5	3	0	1	1	2	1	1	2	0	1	5	3	0	1	1	2	2	4	4	2	2	1	1	1	2	4	4	4	3	4	3	2	3	3	2	3	4
6585	2	1	1	2	0	1	5	3	0	1	1	2	1	1	2	0	1	5	3	0	1	1	3	4	1	1	1	0	3	2	-8	4	4	3	5	3	3	2	1	2	1	1	3	2
6586	2	1	1	2	0	1	5	3	0	1	1	2	1	1	2	0	1	5	3	0	1	1	3	3	4	3	2	1	1	1	1	2	5	3	5	-8	3	6	5	6	2	2	3	1
6587	2	1	1	2	0	1	5	3	0	1	1	2	1	1	2	0	1	5	3	0	1	1	5	4	5	2	1	1	3	3	3	1	4	4	2	3	4	5	3	6	4	1	3	3
6588	2	1	1	2	0	1	5	3	0	1	1	2	1	1	2	0	1	5	3	0	1	1	3	4	4	3	2	1	1	1	1	2	4	3	3	2	3	5	4	6	3	2	3	2
6589	2	1	1	2	0	1	5	3	0	1	1	2	1	1	2	0	1	5	3	0	1	1	2	4	4	2	1	1	3	3	2	4	4	4	2	2	4	4	3	4	3	1	3	2
6590	2	1	1	2	0	1	5	3	0	1	1	2	1	1	2	0	1	5	3	0	1	1	2	4	4	1	0	1	2	1	1	4	4	1	2	1	5	4	3	4	3	2	1	4
6591	2	1	1	2	0	1	5	3	0	1	1	2	1	1	2	0	1	5	3	0	1	1	3	3	3	3	2	1	1	1	1	2	5	4	5	-8	3	1	3	1	2	2	3	3
6592	2	1	1	2	0	1	5	3	0	1	1	2	1	1	2	0	1	5	3	0	1	1	2	3	4	6	3	3	1	1	1	1	4	5	5	3	5	5	3	6	2	2	3	5
6593	2	1	1	2	0	1	5	3	0	1	1	2	1	1	2	0	1	5	3	0	1	1	4	5	5	3	2	1	1	2	1	1	4	3	4	3	3	5	5	4	3	1	3	2
6594	2	1	1	2	0	1	5	3	0	1	1	2	1	1	2	0	1	5	3	0	1	1	4	4	4	3	2	1	1	1	1	2	4	4	3	3	4	5	4	6	4	1	3	4
6595	2	1	1	2	0	1	5	3	0	1	1	2	1	1	2	0	1	5	3	0	1	1	3	2	4	2	1	1	1	1	1	2	4	3	4	2	2	5	5	7	2	1	3	2
6596	2	1	1	2	0	1	5	3	0	1	1	2	1	1	2	0	1	5	3	0	1	1	2	4	4	2	1	1	3	1	1	4	4	3	4	2	3	5	3	4	2	2	3	3
6597	2	1	1	2	0	1	5	3	0	1	1	2	1	1	2	0	1	5	3	0	1	1	2	2	5	3	1	2	1	1	1	2	5	5	4	4	4	5	4	7	3	1	3	1
6598	2	1	1	2	0	1	5	3	0	1	1	2	1	1	2	0	1	5	3	0	1	1	4	3	5	2	1	1	1	1	1	2	5	4	4	3	5	5	4	6	4	1	3	4
6599	2	1	1	2	0	1	5	3	0	1	1	2	1	1	2	0	1	5	3	0	1	1	2	3	4	2	1	1	2	1	1	2	5	5	5	5	2	1	1	1	1	2	3	2
6600	2	1	1	2	0	1	5	3	0	1	1	2	1	1	2	0	1	5	3	0	1	1	4	4	5	3	2	1	1	1	1	3	4	2	4	4	4	8	1	8	1	2	3	4
6601	2	1	1	2	0	1	5	3	0	1	1	2	1	1	2	0	1	5	3	0	1	1	2	2	4	2	1	1	1	1	1	2	5	2	5	2	4	4	4	5	2	1	3	3
6602	2	1	1	2	0	1	5	3	0	1	1	2	1	1	2	0	1	5	3	0	1	1	2	4	4	2	1	1	1	1	1	2	3	3	4	2	3	5	3	7	2	2	3	2
6603	2	1	1	2	0	1	5	3	0	1	1	2	1	1	2	0	1	5	3	0	1	1	3	3	3	2	1	1	3	1	3	2	3	2	2	2	4	2	2	6	2	1	3	4
6604	2	1	1	2	0	1	5	3	0	1	1	2	1	1	2	0	1	5	3	0	1	1	2	4	4	2	1	1	4	2	3	1	2	2	2	2	4	2	1	4	5	1	3	2
6605	2	1	1	2	0	1	5	3	0	1	1	2	1	1	2	0	1	5	3	0	1	1	2	4	4	2	1	1	1	1	1	2	4	4	3	2	4	5	4	6	4	2	3	4
6606	2	1	1	2	0	1	5	3	0	1	1	2	1	1	2	0	1	5	3	0	1	1	2	2	4	2	1	1	2	1	1	2	4	2	3	1	4	4	3	5	3	2	3	4
6607	2	1	1	2	0	1	5	3	0	1	1	2	1	1	2	0	1	5	3	0	1	1	2	2	4	2	2	0	3	1	-8	2	4	3	5	3	3	5	4	6	2	2	2	2
6608	2	1	1	2	0	1	5	3	0	1	1	2	1	1	2	0	1	5	3	0	1	1	4	4	4	1	1	0	1	1	1	4	4	2	4	2	3	4	3	6	2	2	1	2
6609	2	1	1	2	0	1	5	3	0	1	1	2	1	1	2	0	1	5	3	0	1	1	4	3	4	2	1	1	1	1	1	2	4	4	4	3	2	5	4	6	4	1	3	2
6610	2	1	1	2	0	1	5	3	0	1	1	2	1	1	2	0	1	5	3	0	1	1	2	4	4	2	1	1	1	1	1	2	4	4	2	2	3	4	6	6	3	2	3	1
6611	2	1	1	2	0	1	5	3	0	1	1	2	1	1	2	0	1	5	3	0	1	1	2	2	4	2	1	1	3	2	3	4	2	2	2	2	4	5	4	6	3	2	3	3
6612	2	1	1	2	0	1	5	3	0	1	1	2	1	1	2	0	1	5	3	0	1	1	3	4	4	2	1	1	3	1	3	4	4	4	4	4	3	5	5	5	5	1	3	3
6613	2	1	1	2	0	1	5	3	0	1	1	2	1	1	2	0	1	5	3	0	1	1	2	3	5	2	1	1	1	1	1	2	4	4	3	3	4	6	4	7	4	2	3	3
6614	2	1	1	2	0	1	5	3	0	1	1	2	1	1	2	0	1	5	3	0	1	1	4	4	5	2	1	1	3	1	-8	4	4	4	4	1	4	4	4	-8	4	2	3	4
6615	2	1	1	2	0	1	5	3	0	1	1	2	1	1	2	0	1	5	3	0	1	1	2	4	5	2	1	1	4	1	4	2	5	2	2	2	2	6	3	8	3	1	3	4
6616	2	1	1	2	0	1	5	3	0	1	1	2	1	1	2	0	1	5	3	0	1	1	3	2	5	2	1	1	1	1	1	2	5	2	5	2	5	5	5	6	2	2	3	2
6617	2	1	1	2	0	1	1	3	0	1	1	2	1	1	2	0	1	1	3	0	1	1	2	2	4	2	2	0	1	1	1	4	2	2	1	2	5	5	4	6	2	2	3	2
6618	2	1	1	2	0	1	1	3	0	1	1	2	1	1	2	0	1	1	3	0	1	1	4	2	4	2	1	1	2	2	2	2	3	3	3	3	3	6	4	5	5	3	3	4
6619	2	1	1	2	0	1	1	3	0	1	1	2	1	1	2	0	1	1	3	0	1	1	4	4	4	2	2	0	1	1	1	3	4	4	4	3	4	4	3	5	3	2	3	4
6620	2	1	1	2	0	1	1	3	0	1	1	2	1	1	2	0	1	1	3	0	1	1	4	3	4	4	2	2	1	1	1	2	4	4	4	3	4	4	3	5	3	2	3	4
6621	2	1	1	2	0	1	1	3	0	1	1	2	1	1	2	0	1	1	3	0	1	1	4	4	5	2	1	1	3	1	2	3	4	2	2	2	5	5	4	6	2	1	3	2
6622	2	1	1	2	0	1	1	3	0	1	1	2	1	1	2	0	1	1	3	0	1	1	3	4	4	2	1	1	1	1	1	4	2	2	4	3	3	4	2	4	2	2	3	3
6623	2	1	1	2	0	1	1	3	0	1	1	2	1	1	2	0	1	1	3	0	1	1	4	4	3	97	97	97	2	2	3	3	4	2	3	2	3	4	4	4	4	2	3	4
6624	2	1	1	2	0	1	1	3	0	1	1	2	1	1	2	0	1	1	3	0	1	1	3	4	4	2	1	1	2	1	1	2	4	4	5	1	4	5	4	7	3	2	3	2
6625	2	1	1	2	0	1	1	3	0	1	1	2	1	1	2	0	1	1	3	0	1	1	2	4	4	2	1	1	2	1	1	3	3	4	2	1	4	5	3	6	2	2	3	3
6626	2	1	1	2	0	1	1	3	0	1	1	2	1	1	2	0	1	1	3	0	1	1	3	1	2	-3	-3	-3	1	1	1	2	4	3	4	3	3	2	2	2	2	1	3	2
6627	2	1	1	2	0	1	1	3	0	1	1	2	1	1	2	0	1	1	3	0	1	1	3	2	4	2	1	1	3	2	1	4	2	1	2	1	5	5	3	5	2	2	3	4
6628	2	1	1	2	0	1	1	3	0	1	1	2	1	1	2	0	1	1	3	0	1	1	2	2	4	2	1	1	1	1	1	1	3	2	2	2	2	4	3	5	2	1	3	4
6629	2	1	1	2	0	1	1	3	0	1	1	2	1	1	2	0	1	1	3	0	1	1	4	4	4	2	1	1	3	1	1	2	4	4	4	3	4	5	4	7	4	2	3	4
6630	2	1	1	2	0	1	1	3	0	1	1	2	1	1	2	0	1	1	3	0	1	1	2	2	4	1	0	1	3	1	1	2	2	1	2	1	3	4	3	5	2	2	3	2
6631	2	1	1	2	0	1	1	3	0	1	1	2	1	1	2	0	1	1	3	0	1	1	3	2	2	2	1	1	1	1	1	2	5	4	3	3	4	1	1	1	1	1	3	3
6632	2	1	1	2	0	1	1	3	0	1	1	2	1	1	2	0	1	1	3	0	1	1	4	4	4	1	1	0	4	2	4	4	2	1	2	2	4	5	3	8	2	2	3	3
6633	2	1	1	2	0	1	1	3	0	1	1	2	1	1	2	0	1	1	3	0	1	1	3	4	5	3	2	1	1	1	1	2	4	4	4	3	4	6	3	8	2	2	3	2
6634	2	1	1	2	0	1	1	3	0	1	1	2	1	1	2	0	1	1	3	0	1	1	4	2	5	2	1	1	1	1	1	2	2	2	2	2	4	4	4	4	2	2	3	2
6635	2	1	1	2	0	1	1	3	0	1	1	2	1	1	2	0	1	1	3	0	1	1	4	4	4	2	1	1	1	1	1	4	1	5	5	1	4	5	10	5	3	2	3	1
6636	2	1	1	2	0	1	1	3	0	1	1	2	1	1	2	0	1	1	3	0	1	1	2	4	5	2	1	1	1	1	1	2	4	4	5	4	3	6	5	7	4	2	3	2
6637	2	1	1	2	0	1	1	3	0	1	1	2	1	1	2	0	1	1	3	0	1	1	3	4	4	3	2	1	-8	-8	-8	2	4	4	3	4	4	5	5	-8	4	2	3	4
6638	2	1	1	2	0	1	1	3	0	1	1	2	1	1	2	0	1	1	3	0	1	1	4	4	5	2	1	1	1	1	1	2	4	4	4	3	3	4	3	6	3	2	3	4
6639	2	1	1	2	0	1	1	3	0	1	1	2	1	1	2	0	1	1	3	0	1	1	4	4	5	2	1	1	1	1	2	2	4	4	4	4	4	5	3	6	3	2	3	4
6640	2	1	1	2	0	1	1	3	0	1	1	2	1	1	2	0	1	1	3	0	1	1	2	2	4	2	1	1	1	1	1	2	3	3	4	3	4	5	4	7	4	1	3	4
6641	2	1	1	2	0	1	1	3	0	1	1	2	1	1	2	0	1	1	3	0	1	1	2	4	4	2	1	1	1	1	1	4	4	4	4	2	4	4	2	3	3	2	3	2
6642	2	1	1	2	0	1	1	3	0	1	1	2	1	1	2	0	1	1	3	0	1	1	4	4	5	4	2	2	2	1	1	2	4	4	4	2	4	2	1	2	2	2	3	2
6643	2	1	1	2	0	1	1	3	0	1	1	2	1	1	2	0	1	1	3	0	1	1	3	3	4	6	4	2	1	1	-8	4	5	4	4	-8	3	5	4	6	1	2	3	-8
6644	2	1	1	2	0	1	1	3	0	1	1	2	1	1	2	0	1	1	3	0	1	1	3	3	4	3	2	1	3	1	1	2	3	4	4	3	4	6	2	8	2	2	3	3
6645	2	1	1	2	0	1	1	3	0	1	1	2	1	1	2	0	1	1	3	0	1	1	3	5	5	2	1	1	1	1	1	2	4	4	4	4	4	5	4	3	1	1	3	4
6646	2	1	1	2	0	1	1	3	0	1	1	2	1	1	2	0	1	1	3	0	1	1	2	3	5	2	1	1	1	1	1	2	5	2	5	2	3	5	4	6	1	2	3	1
6647	2	1	1	2	0	1	1	3	0	1	1	2	1	1	2	0	1	1	3	0	1	1	4	4	4	4	2	2	2	2	2	2	3	4	4	3	4	3	3	5	4	2	3	2
6648	2	1	1	2	0	1	1	3	0	1	1	2	1	1	2	0	1	1	3	0	1	1	2	3	5	2	0	2	1	1	1	2	4	4	5	3	3	5	4	6	2	2	3	2
6649	2	1	1	2	0	1	1	3	0	1	1	2	1	1	2	0	1	1	3	0	1	1	4	4	4	2	1	1	3	1	1	4	4	4	4	3	4	4	3	5	3	2	3	4
6650	2	1	1	2	0	1	1	3	0	1	1	2	1	1	2	0	1	1	3	0	1	1	4	4	4	4	2	2	2	2	2	2	4	4	4	3	4	4	4	5	4	2	3	4
6651	2	1	1	2	0	1	1	3	0	1	1	2	1	1	2	0	1	1	3	0	1	1	3	4	4	4	2	2	2	2	2	2	4	4	4	3	4	2	2	2	3	2	3	4
6652	2	1	1	2	0	1	1	3	0	1	1	2	1	1	2	0	1	1	3	0	1	1	2	5	5	2	1	1	2	1	1	1	4	4	2	3	5	5	4	6	3	1	3	2
6653	2	1	1	2	0	1	1	3	0	1	1	2	1	1	2	0	1	1	3	0	1	1	5	4	4	2	1	1	1	2	1	4	5	1	1	2	2	6	5	7	3	1	3	4
6654	2	1	1	2	0	1	1	3	0	1	1	2	1	1	2	0	1	1	3	0	1	1	2	3	4	3	1	2	1	1	1	2	5	1	5	1	2	4	3	5	1	2	3	2
6655	2	1	1	3	0	1	1	3	0	1	1	2	1	1	3	0	1	1	3	0	1	1	4	2	2	2	1	1	2	1	1	2	4	4	4	3	4	3	1	4	2	1	3	3
6656	2	1	1	3	0	1	1	3	0	1	1	2	1	1	3	0	1	1	3	0	1	1	2	2	4	2	1	1	2	3	3	4	3	2	2	2	4	5	3	5	2	2	3	3
6657	2	1	1	3	0	1	1	3	0	1	1	2	1	1	3	0	1	1	3	0	1	1	2	4	5	4	3	1	1	1	1	2	4	4	2	4	4	4	2	5	1	2	3	2
6658	2	1	1	3	0	1	1	3	0	1	1	2	1	1	3	0	1	1	3	0	1	1	2	3	4	2	1	1	1	1	1	2	4	4	4	2	4	1	1	2	1	2	3	4
6659	2	1	1	3	0	1	1	3	0	1	1	2	1	1	3	0	1	1	3	0	1	1	2	4	4	2	1	1	1	1	1	2	4	2	4	2	4	5	5	5	3	1	3	4
6660	2	1	1	3	0	1	1	3	0	1	1	2	1	1	3	0	1	1	3	0	1	1	3	4	4	1	1	0	2	1	2	2	3	3	3	2	3	6	5	7	4	2	3	3
6661	2	1	1	3	0	1	1	3	0	1	1	2	1	1	3	0	1	1	3	0	1	1	2	4	5	-2	-2	-2	2	1	3	2	3	3	3	3	3	5	3	5	3	2	3	3
6662	2	1	1	3	0	1	1	3	0	1	1	2	1	1	3	0	1	1	3	0	1	1	4	3	4	2	1	1	2	1	1	2	4	4	5	2	3	7	6	8	5	2	3	2
6663	2	1	1	3	0	1	1	3	0	1	1	2	1	1	3	0	1	1	3	0	1	1	2	4	5	2	1	1	1	1	1	4	4	2	1	2	4	6	4	7	3	1	3	1
6664	2	1	1	3	0	1	1	3	0	1	1	2	1	1	3	0	1	1	3	0	1	1	2	4	4	4	1	3	2	1	1	2	4	2	4	2	4	5	2	7	2	1	3	2
6665	2	1	1	3	0	1	1	3	0	1	1	2	1	1	3	0	1	1	3	0	1	1	2	4	4	1	1	0	1	1	1	2	4	4	4	4	2	3	2	3	2	2	3	4
6666	2	1	1	3	0	1	1	3	0	1	1	2	1	1	3	0	1	1	3	0	1	1	4	4	4	4	1	3	2	2	2	2	3	2	2	2	4	4	2	7	3	1	3	3
6667	2	1	1	3	0	1	1	3	0	1	1	2	1	1	3	0	1	1	3	0	1	1	3	3	4	2	1	1	1	1	-8	4	5	5	3	1	1	4	2	5	2	2	3	1
6668	2	1	1	3	0	1	1	3	0	1	1	2	1	1	3	0	1	1	3	0	1	1	2	3	4	1	1	0	2	2	2	2	2	2	2	2	3	1	1	2	1	2	3	2
6669	2	1	1	3	0	1	1	3	0	1	1	2	1	1	3	0	1	1	3	0	1	1	4	4	4	2	1	1	1	1	1	2	4	4	4	3	4	5	4	6	4	1	3	4
6670	2	1	1	3	0	1	1	3	0	1	1	2	1	1	3	0	1	1	3	0	1	1	4	4	4	2	1	1	1	1	1	2	4	4	4	3	3	5	4	6	4	1	3	4
6671	2	1	1	3	0	1	1	3	0	1	1	2	1	1	3	0	1	1	3	0	1	1	2	3	3	2	1	1	1	1	1	2	2	2	1	1	3	4	3	5	2	2	3	-8
6672	2	1	1	3	0	1	1	3	0	1	1	2	1	1	3	0	1	1	3	0	1	1	2	4	5	3	2	1	1	1	1	2	4	4	4	2	4	4	3	5	3	1	3	4
6673	2	1	1	3	0	1	1	3	0	1	1	2	1	1	3	0	1	1	3	0	1	1	2	4	4	2	1	1	1	1	1	2	4	4	3	3	4	5	3	6	2	1	3	2
6674	2	1	1	3	0	1	1	3	0	1	1	2	1	1	3	0	1	1	3	0	1	1	4	2	4	3	2	1	1	1	1	4	4	4	3	4	4	3	2	3	2	2	3	3
6675	2	1	1	3	0	1	1	3	0	1	1	2	1	1	3	0	1	1	3	0	1	1	4	4	4	2	1	1	3	2	3	2	4	4	4	2	4	5	4	6	4	1	3	4
6676	2	1	1	3	0	1	1	3	0	1	1	2	1	1	3	0	1	1	3	0	1	1	2	3	4	2	1	1	2	1	1	2	3	4	2	2	4	5	3	7	3	2	3	4
6677	2	1	1	3	0	1	1	3	0	1	1	2	1	1	3	0	1	1	3	0	1	1	2	4	4	3	1	2	3	1	3	4	5	2	2	2	3	3	2	4	1	2	3	4
6678	2	1	1	3	0	1	1	3	0	1	1	2	1	1	3	0	1	1	3	0	1	1	3	2	5	2	1	1	3	1	1	2	4	2	4	3	3	4	3	5	1	1	3	2
6679	2	1	1	3	0	1	1	3	0	1	1	2	1	1	3	0	1	1	3	0	1	1	4	4	5	4	3	1	1	1	1	2	4	4	4	2	4	5	4	5	4	2	3	4
6680	2	1	1	3	0	1	1	3	0	1	1	2	1	1	3	0	1	1	3	0	1	1	2	4	4	1	1	0	1	1	1	4	4	4	4	3	4	5	4	6	3	1	2	4
6681	2	1	1	3	0	1	1	3	0	1	1	2	1	1	3	0	1	1	3	0	1	1	2	4	4	5	2	3	1	1	1	4	2	2	2	2	2	5	3	5	2	1	3	2
6682	2	1	1	3	0	1	1	3	0	1	1	2	1	1	3	0	1	1	3	0	1	1	2	4	5	2	1	1	3	1	3	4	4	4	3	3	3	6	4	5	2	3	3	3
6683	2	1	1	3	0	1	1	3	0	1	1	2	1	1	3	0	1	1	3	0	1	1	3	2	4	2	1	1	1	1	1	2	4	2	3	2	3	4	3	5	1	2	3	2
6684	2	1	1	3	0	1	1	3	0	1	1	2	1	1	3	0	1	1	3	0	1	1	3	4	4	2	1	1	1	1	1	2	4	3	4	2	3	5	3	7	2	1	3	3
6685	2	1	1	3	0	1	1	3	0	1	1	2	1	1	3	0	1	1	3	0	1	1	3	4	4	2	1	1	2	1	1	2	3	2	4	1	4	5	4	6	2	1	3	3
6686	2	1	1	3	0	1	1	3	0	1	1	2	1	1	3	0	1	1	3	0	1	1	2	4	4	4	3	1	2	1	1	2	2	1	2	1	3	4	3	5	1	2	2	2
6687	2	1	1	3	0	1	1	3	0	1	1	2	1	1	3	0	1	1	3	0	1	1	4	2	4	2	1	1	2	1	3	4	2	2	2	2	4	6	5	5	4	1	3	2
6688	2	1	1	3	0	1	1	3	0	1	1	2	1	1	3	0	1	1	3	0	1	1	3	4	4	2	1	1	1	1	1	2	5	4	3	4	3	4	3	5	2	1	3	2
6689	2	1	1	3	0	1	1	3	0	1	1	2	1	1	3	0	1	1	3	0	1	1	2	4	3	3	2	1	1	1	1	2	4	4	2	2	4	5	2	6	2	1	3	2
6690	2	1	1	3	0	1	1	3	0	1	1	2	1	1	3	0	1	1	3	0	1	1	3	4	4	4	2	2	2	2	3	2	2	2	4	2	4	5	5	5	5	2	3	2
6691	2	1	1	3	0	1	1	3	0	1	1	2	1	1	3	0	1	1	3	0	1	1	2	4	4	2	97	97	1	1	1	2	4	4	3	3	4	5	4	8	2	1	3	2
6692	2	1	1	3	0	1	1	3	0	1	1	2	1	1	3	0	1	1	3	0	1	1	4	2	3	2	1	1	1	1	1	4	5	5	4	4	2	4	2	5	1	2	3	1
6693	2	1	1	3	0	1	1	3	0	1	1	2	1	1	3	0	1	1	3	0	1	1	4	4	4	2	1	1	1	1	1	2	4	4	4	4	4	4	4	5	3	2	3	4
6694	2	1	1	3	0	1	1	1	0	0	1	2	1	1	3	0	1	1	1	0	0	1	2	3	2	1	0	1	1	1	1	2	4	3	4	3	3	3	2	4	1	1	3	3
6695	2	1	1	3	0	1	1	1	0	0	1	2	1	1	3	0	1	1	1	0	0	1	3	4	3	2	1	1	1	1	1	2	4	4	3	2	4	4	3	4	3	2	3	3
6696	2	1	1	3	0	1	1	1	0	0	1	2	1	1	3	0	1	1	1	0	0	1	5	5	4	2	2	0	3	1	-8	4	5	5	5	1	3	4	2	6	2	1	3	1
6697	2	1	1	3	0	1	1	1	0	0	1	2	1	1	3	0	1	1	1	0	0	1	2	3	4	2	1	1	1	1	1	2	4	4	4	4	4	1	1	1	1	2	3	4
6698	2	1	1	3	0	1	1	1	0	0	0	2	1	1	3	0	1	1	1	0	0	0	1	4	5	5	3	2	1	1	1	4	2	2	1	2	3	5	3	6	1	1	3	2
6699	2	1	1	3	0	1	1	1	0	0	0	2	1	1	3	0	1	1	1	0	0	0	1	4	4	-2	-2	-2	3	1	3	2	5	2	4	1	3	5	4	7	2	1	-8	3
6700	2	1	1	3	0	1	1	1	0	0	0	2	1	1	3	0	1	1	1	0	0	0	3	2	4	1	1	0	3	1	2	2	2	3	4	3	3	5	3	7	3	2	3	4
6701	2	1	1	3	0	1	1	1	0	0	0	2	1	1	3	0	1	1	1	0	0	0	4	2	4	2	1	1	1	1	1	1	2	2	2	2	2	5	3	7	3	2	3	2
6702	2	1	1	3	0	1	1	1	0	0	0	2	1	1	3	0	1	1	1	0	0	0	1	1	3	2	1	1	3	1	1	4	5	5	4	2	3	4	2	5	1	2	3	1
6703	2	1	1	3	0	1	1	1	0	0	0	2	1	1	3	0	1	1	1	0	0	0	4	3	4	2	1	1	1	1	-8	2	5	4	4	1	4	5	5	6	4	2	3	4
6704	2	1	1	3	0	1	1	1	0	0	0	2	1	1	3	0	1	1	1	0	0	0	4	2	3	2	1	1	3	1	2	2	4	3	4	2	4	4	3	6	3	1	3	4
6705	2	1	1	3	0	1	1	1	0	0	0	2	1	1	3	0	1	1	1	0	0	0	2	4	4	2	1	1	2	3	2	4	4	2	4	2	4	3	2	3	2	1	3	4
6706	2	1	1	3	0	1	1	1	0	0	0	2	1	1	3	0	1	1	1	0	0	0	4	2	4	2	1	1	1	1	1	2	2	2	4	2	4	4	3	7	3	1	3	2
6707	2	1	1	3	0	1	1	1	0	0	0	2	1	1	3	0	1	1	1	0	0	0	4	1	4	3	2	1	1	1	1	2	5	3	4	3	4	5	2	6	1	2	3	4
6708	2	1	1	3	0	1	1	1	0	0	0	2	1	1	3	0	1	1	1	0	0	0	2	3	4	2	1	1	1	1	1	2	4	4	4	3	4	6	4	7	4	1	3	4
6709	2	1	1	3	0	1	1	1	0	0	0	2	1	1	3	0	1	1	1	0	0	0	4	4	4	4	2	2	1	1	1	2	5	5	5	3	4	3	3	3	2	2	3	4
6710	2	1	1	3	0	1	1	1	0	0	0	2	1	1	3	0	1	1	1	0	0	0	2	4	2	2	1	1	1	1	1	3	3	2	4	1	4	4	3	5	2	2	3	4
6711	2	1	1	3	0	1	1	1	0	0	0	2	1	1	3	0	1	1	1	0	0	0	4	2	4	2	1	1	3	1	1	2	5	1	4	2	3	5	4	6	1	1	3	3
6712	2	1	1	3	0	1	1	1	0	0	0	2	1	1	3	0	1	1	1	0	0	0	2	2	3	2	1	1	2	1	3	4	2	2	2	2	4	4	3	5	2	2	3	2
6713	2	1	1	3	0	1	1	1	0	0	0	2	1	1	3	0	1	1	1	0	0	0	4	4	4	1	0	1	3	2	2	2	5	5	3	2	4	5	2	6	3	2	3	2
6714	2	1	1	3	0	1	1	1	0	0	0	2	1	1	3	0	1	1	1	0	0	0	4	3	3	2	1	1	2	1	1	2	5	4	4	3	4	1	1	2	8	1	3	2
6715	2	1	1	3	0	1	1	1	0	0	0	2	1	1	3	0	1	1	1	0	0	0	4	2	4	2	1	1	1	1	1	2	5	4	3	3	4	7	5	7	3	1	3	3
6716	2	1	1	3	0	1	1	1	0	0	0	2	1	1	3	0	1	1	1	0	0	0	2	4	4	4	2	2	1	1	1	4	4	2	4	-8	4	3	3	3	2	2	3	3
6717	2	1	1	3	0	1	1	1	0	0	0	2	1	1	3	0	1	1	1	0	0	0	3	4	3	2	1	1	1	1	1	2	5	2	4	2	4	5	4	5	2	1	3	2
6718	2	1	1	3	0	1	1	1	0	0	0	2	1	1	3	0	1	1	1	0	0	0	2	2	4	1	1	0	1	1	1	2	4	3	4	2	2	5	3	7	2	1	3	4
6719	2	1	1	3	0	1	1	1	0	0	0	2	1	1	3	0	1	1	1	0	0	0	4	2	3	2	1	1	3	1	1	2	5	5	5	2	4	4	3	5	2	1	3	3
6720	2	1	1	3	0	1	1	1	0	0	0	2	1	1	3	0	1	1	1	0	0	0	2	4	4	2	1	1	1	1	1	2	3	2	3	1	4	4	3	6	2	2	3	2
6721	2	1	1	3	0	1	1	1	0	0	0	2	1	1	3	0	1	1	1	0	0	0	3	4	4	2	1	1	1	1	1	2	4	2	4	1	4	5	3	7	2	2	3	3
6722	2	1	1	3	0	1	1	1	0	0	0	2	1	1	3	0	1	1	1	0	0	0	3	4	4	2	1	1	3	1	3	2	4	3	4	3	3	5	4	5	2	2	3	3
6723	2	1	1	3	0	1	1	1	0	0	0	2	1	1	3	0	1	1	1	0	0	0	3	2	5	5	3	2	2	1	3	2	4	3	4	3	4	5	4	6	4	1	3	4
6724	2	1	1	3	0	1	1	1	0	0	0	2	1	1	3	0	1	1	1	0	0	0	5	4	5	2	1	1	2	1	1	2	4	3	2	2	5	5	2	8	2	2	3	4
6725	2	1	1	3	0	1	1	1	0	0	0	2	1	1	3	0	1	1	1	0	0	0	2	4	5	2	1	1	2	2	2	1	4	4	5	3	2	7	6	8	4	1	3	3
6726	2	1	1	3	0	1	1	1	0	0	0	2	1	1	3	0	1	1	1	0	0	0	4	4	4	4	3	1	1	1	1	2	4	4	3	3	4	5	4	6	4	1	3	4
6727	2	1	1	3	0	1	1	1	0	0	0	2	1	1	3	0	1	1	1	0	0	0	2	4	5	4	2	2	1	1	1	2	4	4	1	3	3	5	3	7	2	2	3	2
6728	2	1	1	3	0	1	1	1	0	0	0	2	1	1	3	0	1	1	1	0	0	0	2	4	5	2	1	1	1	1	1	2	4	4	3	3	4	6	8	2	9	3	2	3
6729	2	1	1	3	0	1	1	1	0	0	0	2	1	1	3	0	1	1	1	0	0	0	1	4	5	1	1	0	2	2	3	2	2	2	5	2	2	5	5	6	3	1	3	2
6730	2	1	1	3	0	1	1	1	0	0	0	2	1	1	3	0	1	1	1	0	0	0	2	4	4	2	1	1	2	2	3	2	4	4	4	2	4	5	5	5	4	1	3	2
6731	2	1	1	3	0	1	1	1	0	0	0	2	1	1	3	0	1	1	1	0	0	0	4	2	5	2	1	1	3	1	3	2	4	3	4	2	4	5	4	6	4	1	3	2
6732	2	1	1	3	0	1	1	1	0	0	0	2	1	1	3	0	1	1	1	0	0	0	2	4	4	2	1	1	1	1	1	4	4	2	4	-8	4	3	2	3	2	2	3	3
6733	2	1	1	3	0	1	1	1	0	0	0	2	1	1	3	0	1	1	1	0	0	0	2	4	4	2	1	1	1	1	1	2	4	4	4	4	2	4	3	5	2	2	3	2
6734	2	1	1	3	0	1	1	1	0	0	0	2	1	1	3	0	1	1	1	0	0	0	2	2	4	2	1	1	1	1	1	2	4	2	4	4	2	3	5	5	5	1	3	4
6735	2	1	1	3	0	1	1	1	0	0	0	2	1	1	3	0	1	1	1	0	0	0	4	3	4	0	0	0	1	1	1	2	4	2	2	2	3	4	3	5	2	2	3	3
6736	2	1	1	3	0	1	1	1	0	0	0	2	1	1	3	0	1	1	1	0	0	0	1	4	4	2	1	1	1	1	1	4	4	2	4	2	2	5	3	6	2	1	3	2
6737	2	1	1	3	0	1	1	1	0	0	0	2	1	1	3	0	1	1	1	0	0	0	4	2	3	2	1	1	1	1	1	2	4	4	4	3	4	5	4	6	2	2	3	3
6738	2	1	1	3	0	1	1	1	0	0	0	2	1	1	3	0	1	1	1	0	0	0	4	4	4	2	1	1	2	1	1	4	4	3	2	2	4	6	4	6	2	1	3	2
6739	2	1	1	3	0	1	1	1	0	0	0	2	1	1	3	0	1	1	1	0	0	0	2	4	4	3	2	1	1	1	1	2	4	4	4	3	4	5	4	6	4	2	3	4
6740	2	1	1	3	0	1	1	1	0	0	0	2	1	1	3	0	1	1	1	0	0	0	5	4	4	2	1	1	1	1	1	3	1	1	1	1	3	6	3	-8	3	1	3	3
6741	2	1	1	3	0	1	1	1	0	0	0	2	1	1	3	0	1	1	1	0	0	0	2	3	4	2	1	1	2	1	3	2	2	2	4	2	4	7	5	9	4	2	3	2
6742	2	1	1	3	0	1	1	1	0	0	0	2	1	1	3	0	1	1	1	0	0	0	4	4	4	2	1	1	4	2	1	4	4	4	4	1	5	5	5	6	4	1	3	4
6743	2	1	1	3	0	1	1	1	0	0	0	2	1	1	3	0	1	1	1	0	0	0	2	4	4	2	1	1	1	1	1	2	4	3	3	2	2	5	4	6	3	1	3	2
6744	2	1	1	3	0	1	1	1	0	0	0	2	1	1	3	0	1	1	1	0	0	0	2	4	4	2	1	1	1	1	1	2	4	4	4	2	4	6	5	6	4	1	3	2
6745	2	1	1	3	0	1	1	1	0	0	0	2	1	1	3	0	1	1	1	0	0	0	4	4	5	2	1	1	2	1	3	4	4	4	2	2	4	5	4	6	2	2	3	4
6746	2	1	1	3	0	1	1	1	0	0	0	2	1	1	3	0	1	1	1	0	0	0	3	2	3	2	1	1	1	1	-8	1	2	2	3	2	1	1	1	2	1	1	3	5
6747	2	1	1	3	0	1	1	1	0	0	0	2	1	1	3	0	1	1	1	0	0	0	2	4	4	2	1	1	3	1	3	4	2	4	3	2	4	5	3	-8	3	2	3	2
6748	2	1	1	3	0	1	1	1	0	0	0	2	1	1	3	0	1	1	1	0	0	0	1	1	1	4	2	2	3	1	1	4	1	2	2	2	4	2	1	3	1	2	3	3
6749	2	1	1	3	0	1	1	1	0	0	0	2	1	1	3	0	1	1	1	0	0	0	2	4	4	2	1	1	1	1	1	2	5	2	3	2	2	5	3	-8	1	1	3	-8
6750	2	1	1	3	0	1	1	1	0	0	0	2	1	1	3	0	1	1	1	0	0	0	4	1	3	2	1	1	3	1	1	4	4	2	4	1	4	5	5	8	4	2	3	4
6751	2	1	1	3	0	1	1	1	0	0	0	2	1	1	3	0	1	1	1	0	0	0	4	4	5	2	1	1	3	1	-8	4	2	3	2	1	-8	4	4	6	2	1	3	3
6752	2	1	1	3	0	1	1	1	0	0	0	2	1	1	3	0	1	1	1	0	0	0	3	4	4	2	1	1	1	1	1	2	4	4	3	2	3	5	4	5	3	1	3	2
6753	2	1	1	3	0	1	1	1	0	0	0	2	1	1	3	0	1	1	1	0	0	0	4	3	4	1	1	0	1	1	1	2	4	4	4	2	4	8	6	10	3	1	3	2
6754	2	1	1	3	0	1	1	1	0	0	0	2	1	1	3	0	1	1	1	0	0	0	3	1	5	1	97	97	3	1	1	2	2	2	3	2	4	5	3	-8	1	2	3	3
6755	2	1	1	3	0	1	1	1	0	0	0	2	1	1	3	0	1	1	1	0	0	0	3	4	4	2	97	97	2	1	1	3	3	4	3	3	4	5	5	-8	2	1	3	3
6756	2	1	1	3	0	1	1	1	0	0	0	2	1	1	3	0	1	1	1	0	0	0	4	2	2	2	1	1	2	1	1	4	3	2	2	3	4	1	1	3	1	2	3	2
6757	2	1	1	3	0	1	1	1	0	0	0	2	1	1	3	0	1	1	1	0	0	0	2	4	2	2	1	1	1	1	3	4	2	2	2	2	5	4	4	-8	6	1	3	2
6758	2	1	1	3	0	1	1	1	0	0	0	2	1	1	3	0	1	1	1	0	0	0	4	4	4	1	97	97	3	1	3	4	2	2	3	2	4	4	4	6	3	2	3	4
6759	2	1	1	3	0	1	1	1	0	0	0	2	1	1	3	0	1	1	1	0	0	0	5	4	4	1	0	1	4	1	3	2	4	2	2	2	3	5	4	5	3	2	3	2
6760	2	1	1	3	0	1	1	1	0	0	0	2	1	1	3	0	1	1	1	0	0	0	1	2	3	2	97	97	5	1	1	3	4	4	2	2	4	5	5	4	2	2	3	3
6761	2	1	1	3	0	1	1	1	0	0	0	2	1	1	3	0	1	1	1	0	0	0	4	2	4	2	1	1	1	1	2	4	4	2	3	3	4	3	3	3	1	1	3	3
6762	2	1	1	3	0	1	1	2	0	0	0	2	1	1	3	0	1	1	2	0	0	0	3	3	4	2	0	2	1	1	1	3	4	4	4	4	4	6	6	6	6	2	3	3
6763	2	1	1	3	0	1	1	2	0	0	0	2	1	1	3	0	1	1	2	0	0	0	2	3	4	2	1	1	3	1	1	4	4	2	4	1	4	6	-8	7	5	2	3	2
6764	2	1	1	3	0	1	1	2	0	0	0	2	1	1	3	0	1	1	2	0	0	0	4	4	5	2	1	1	3	1	3	2	4	2	2	2	4	3	2	4	2	2	3	3
6765	2	1	1	3	0	1	1	2	0	0	0	2	1	1	3	0	1	1	2	0	0	0	5	4	3	2	1	1	1	1	1	2	4	1	1	1	4	5	1	5	1	2	3	2
6766	2	1	1	3	0	1	1	2	0	0	0	2	1	1	3	0	1	1	2	0	0	0	3	1	3	2	1	1	3	1	3	2	4	4	3	2	4	1	1	2	1	2	3	3
6767	2	1	1	3	0	1	1	2	0	0	0	2	1	1	3	0	1	1	2	0	0	0	5	3	4	2	97	97	1	1	3	1	1	1	4	3	3	4	3	5	5	1	2	3
6768	2	1	1	3	0	1	1	2	0	0	0	2	1	1	3	0	1	1	2	0	0	0	4	1	5	1	97	97	1	1	1	2	5	4	1	1	2	4	3	5	5	2	3	3
6769	2	1	1	3	0	1	1	2	0	0	0	2	1	1	3	0	1	1	2	0	0	0	2	3	4	2	1	1	5	1	1	3	5	4	4	1	4	3	3	3	3	2	3	5
6770	2	1	1	3	0	1	1	2	0	0	0	2	1	1	3	0	1	1	2	0	0	0	4	3	4	2	1	1	3	2	3	4	2	2	2	2	4	4	3	6	2	2	3	4
6771	2	1	1	3	0	1	1	2	0	0	0	2	1	1	3	0	1	1	2	0	0	0	4	2	4	2	1	1	4	1	3	4	2	1	3	1	4	4	4	7	3	2	3	2
6772	2	1	1	3	0	1	1	2	0	0	0	2	1	1	3	0	1	1	2	0	0	0	1	4	5	2	97	97	1	1	1	4	5	3	1	1	1	5	3	6	1	1	3	5
6773	2	1	1	3	0	1	1	2	0	0	0	2	1	1	3	0	1	1	2	0	0	0	4	4	4	2	1	1	1	1	1	2	4	1	5	2	5	4	4	5	3	2	1	5
6774	2	1	1	3	0	1	1	2	0	0	0	2	1	1	3	0	1	1	2	0	0	0	3	4	4	4	2	2	1	1	1	2	3	3	2	2	2	5	4	5	3	1	3	3
6775	2	1	1	3	0	1	1	2	0	0	0	2	1	1	3	0	1	1	2	0	0	0	2	3	4	2	97	97	2	1	-8	3	4	2	2	-8	4	5	5	-8	3	1	1	4
6776	2	1	1	3	0	1	1	2	0	0	0	2	1	1	3	0	1	1	2	0	0	0	4	3	4	97	97	97	3	1	2	2	4	2	3	2	4	5	2	5	2	1	3	2
6777	2	1	1	3	0	1	1	2	0	0	0	2	1	1	3	0	1	1	2	0	0	0	5	2	4	2	2	0	1	1	1	1	5	5	5	4	5	7	3	7	6	2	3	3
6778	2	1	1	3	0	1	1	2	0	0	0	2	1	1	3	0	1	1	2	0	0	0	3	4	4	4	2	2	2	1	3	4	4	3	2	2	3	5	4	5	2	2	3	2
6779	2	1	1	3	0	1	1	2	0	0	0	2	1	1	3	0	1	1	2	0	0	0	3	3	4	2	1	1	2	1	1	4	4	4	3	2	5	6	5	6	4	2	3	4
6780	2	1	1	3	0	1	1	2	0	0	0	2	1	1	3	0	1	1	2	0	0	0	2	2	4	2	1	1	2	1	3	1	2	2	4	2	4	3	2	3	2	1	3	2
6781	2	1	1	3	0	1	1	2	0	0	0	2	1	1	3	0	1	1	2	0	0	0	2	4	4	1	1	0	1	1	1	2	4	2	1	1	5	3	1	4	3	3	3	1
6782	2	1	1	3	0	1	1	2	0	0	0	2	1	1	3	0	1	1	2	0	0	0	4	4	4	2	1	1	2	1	1	2	2	2	4	2	2	6	4	7	3	2	3	4
6783	2	1	1	3	0	1	1	2	0	0	0	2	1	1	3	0	1	1	2	0	0	0	2	5	5	2	1	1	2	1	3	2	5	2	4	1	4	-8	-8	-8	-8	2	3	2
6784	2	1	1	3	0	1	1	2	0	0	0	2	1	1	3	0	1	1	2	0	0	0	3	4	4	4	2	2	5	1	5	2	5	5	5	3	2	3	1	4	1	1	3	4
6785	2	1	1	3	0	1	1	2	0	0	0	2	1	1	3	0	1	1	2	0	0	0	4	3	4	2	1	1	1	1	1	4	2	2	4	2	-8	3	1	2	1	-8	3	-8
6786	2	1	1	3	0	1	1	2	0	0	0	2	1	1	3	0	1	1	2	0	0	0	1	3	4	1	0	1	2	2	2	2	1	4	2	1	4	5	1	2	1	1	2	2
6787	2	1	1	3	0	1	1	2	0	0	0	2	1	1	3	0	1	1	2	0	0	0	4	2	5	2	1	1	1	1	1	4	4	1	1	1	5	4	4	4	3	-8	2	3
6788	2	1	1	3	0	1	1	2	0	0	0	2	1	1	3	0	1	1	2	0	0	0	4	4	4	2	1	1	1	1	3	2	4	4	4	2	4	5	6	4	3	2	3	2
6789	2	1	1	3	0	1	1	2	0	0	0	2	1	1	3	0	1	1	2	0	0	0	4	2	4	2	1	1	1	1	1	3	4	4	4	2	4	5	5	-8	5	2	2	1
6790	2	1	1	3	0	1	1	2	0	0	0	2	1	1	3	0	1	1	2	0	0	0	1	5	4	4	2	2	1	1	1	3	1	1	3	-8	3	5	4	6	1	2	3	1
6791	2	1	1	3	0	1	1	2	0	0	0	2	1	1	3	0	1	1	2	0	0	0	3	4	5	2	1	1	3	1	2	4	3	3	2	1	5	4	5	6	4	2	3	4
6792	2	1	1	3	0	1	1	2	0	0	0	2	1	1	3	0	1	1	2	0	0	0	4	4	4	2	1	1	1	1	1	2	2	2	4	2	4	3	2	1	1	2	3	2
6793	2	1	1	3	0	1	1	2	0	0	0	2	1	1	3	0	1	1	2	0	0	0	4	2	2	2	97	97	4	1	1	2	4	3	2	2	2	3	-8	5	5	2	3	2
6794	2	1	1	3	0	1	1	2	0	0	0	2	1	1	3	0	1	1	2	0	0	0	3	3	3	97	97	97	2	2	1	2	5	2	3	1	5	2	1	3	1	1	1	3
6795	2	1	1	3	0	1	1	2	0	0	0	2	1	1	3	0	1	1	2	0	0	0	5	4	4	2	2	0	5	4	4	4	5	5	2	2	5	5	6	-8	4	2	3	2
6796	2	1	1	3	0	1	1	2	0	0	0	2	1	1	3	0	1	1	2	0	0	0	4	4	4	0	97	97	2	1	1	4	2	4	3	2	4	5	4	5	2	2	1	2
6797	2	1	1	3	0	1	1	2	0	0	0	2	1	1	3	0	1	1	2	0	0	0	4	4	5	1	1	0	3	3	3	4	4	5	5	2	5	7	7	8	3	2	3	1
6798	2	1	1	3	0	1	1	2	0	0	0	2	1	1	3	0	1	1	2	0	0	0	2	4	5	2	1	1	4	2	1	4	4	4	4	2	4	6	8	5	8	2	2	2
6799	2	1	1	3	0	1	1	2	0	0	0	2	1	1	3	0	1	1	2	0	0	0	3	5	5	2	97	97	4	-8	-8	2	4	3	2	-8	5	-8	-8	-8	-8	3	3	2
6800	2	1	1	3	0	1	1	2	0	0	0	2	1	1	3	0	1	1	2	0	0	0	5	2	4	-3	-3	-3	2	1	1	4	4	4	4	2	4	8	6	9	5	2	3	5
6801	2	1	1	3	0	1	1	2	0	0	0	2	1	1	3	0	1	1	2	0	0	0	4	3	3	2	1	1	1	1	1	2	5	2	2	2	4	3	1	4	5	2	3	2
6802	2	1	1	3	0	1	1	2	0	0	0	2	1	1	3	0	1	1	2	0	0	0	2	2	2	2	1	1	3	1	1	1	4	4	3	2	4	-8	-8	-8	-8	1	3	2
6803	2	1	1	3	0	1	1	2	0	0	0	2	1	1	3	0	1	1	2	0	0	0	2	2	3	2	1	1	1	1	1	4	4	2	3	3	4	-8	3	3	1	1	1	1
6804	2	1	1	3	0	1	1	2	0	0	0	2	1	1	3	0	1	1	2	0	0	0	2	4	4	2	1	1	1	1	1	3	4	2	2	2	4	5	5	6	5	2	3	4
6805	2	1	1	3	0	1	1	2	0	0	0	2	1	1	3	0	1	1	2	0	0	0	4	4	4	4	2	2	3	1	1	-8	4	4	3	2	3	5	3	6	2	1	3	2
6806	2	1	1	3	0	1	1	2	0	0	0	2	1	1	3	0	1	1	2	0	0	0	3	4	4	2	1	1	2	1	-8	2	4	4	-8	2	4	1	1	1	1	1	3	2
6807	2	1	1	3	0	1	1	2	0	0	0	2	1	1	3	0	1	1	2	0	0	0	3	1	3	1	97	97	1	1	1	2	2	2	3	1	3	1	1	1	1	2	3	5
6808	2	1	1	3	0	1	1	2	0	0	0	2	1	1	3	0	1	1	2	0	0	0	4	4	4	2	1	1	4	1	1	4	5	5	5	5	3	4	5	-8	3	1	1	5
6809	2	1	1	3	0	1	1	2	0	0	0	2	1	1	3	0	1	1	2	0	0	0	4	2	4	3	2	1	2	1	-8	2	5	5	4	4	5	3	2	3	3	1	3	2
6810	2	1	1	3	0	1	1	2	0	0	0	2	1	1	3	0	1	1	2	0	0	0	2	-8	3	0	0	0	4	3	3	1	1	2	4	2	4	1	4	-8	3	1	1	4
6811	2	1	1	3	0	1	1	2	0	0	0	2	1	1	3	0	1	1	2	0	0	0	2	4	4	2	1	1	1	1	-8	4	4	2	2	1	4	5	4	5	2	1	1	2
6812	2	1	1	3	0	1	1	2	0	0	0	2	1	1	3	0	1	1	2	0	0	0	4	3	3	2	1	1	2	1	1	1	2	2	4	2	3	1	1	1	1	1	3	3
6813	2	1	1	3	0	1	1	2	0	0	0	2	1	1	3	0	1	1	2	0	0	0	5	1	2	3	3	0	2	1	1	3	5	5	5	5	5	3	4	3	2	2	3	5
6814	2	1	1	3	0	1	1	2	0	0	0	2	1	1	3	0	1	1	2	0	0	0	3	4	4	1	1	0	2	1	1	4	3	2	2	2	4	3	4	3	3	1	1	4
6815	2	1	1	3	0	1	1	2	0	0	0	2	1	1	3	0	1	1	2	0	0	0	4	4	4	97	97	97	1	1	1	1	4	3	3	3	4	4	4	-8	4	2	1	4
6816	2	1	1	3	0	1	1	2	0	0	0	2	1	1	3	0	1	1	2	0	0	0	4	3	4	2	1	1	1	1	3	1	3	4	3	2	4	5	3	3	1	1	3	2
6817	2	1	1	3	0	1	1	2	0	0	0	2	1	1	3	0	1	1	2	0	0	0	3	4	4	2	1	1	2	1	3	1	2	1	1	1	5	4	3	7	3	2	3	-8
6818	2	1	1	3	0	1	1	2	0	0	0	2	1	1	3	0	1	1	2	0	0	0	2	2	3	2	1	1	2	1	1	4	4	1	-8	-8	5	1	1	1	1	2	3	3
6819	2	1	1	3	0	1	1	2	0	0	0	2	1	1	3	0	1	1	2	0	0	0	3	2	4	2	1	1	1	1	1	2	4	4	4	1	5	5	5	-8	5	2	3	-8
6820	2	1	1	3	0	1	1	2	0	0	0	2	1	1	3	0	1	1	2	0	0	0	4	2	2	2	1	1	1	1	-8	2	5	4	3	3	4	4	3	5	2	2	3	2
6821	2	1	1	3	0	1	1	2	0	0	0	2	1	1	3	0	1	1	2	0	0	0	2	4	4	3	97	97	1	1	1	1	3	4	2	2	4	5	4	-8	1	1	1	1
6822	2	1	1	3	0	1	1	2	0	0	0	2	1	1	3	0	1	1	2	0	0	0	5	3	4	4	1	3	1	1	1	2	5	5	1	3	2	1	1	3	1	1	3	1
6823	2	1	1	3	0	1	1	2	0	0	0	2	1	1	3	0	1	1	2	0	0	0	4	2	4	3	2	1	3	1	1	2	2	4	3	3	3	6	4	7	2	2	3	3
6824	2	1	1	3	0	1	1	2	0	0	0	2	1	1	3	0	1	1	2	0	0	0	5	1	1	3	2	1	1	1	1	1	2	2	5	2	3	1	1	1	2	2	3	-8
6825	2	1	1	3	0	1	1	2	0	0	0	2	1	1	3	0	1	1	2	0	0	0	1	5	5	2	0	2	2	1	1	2	5	4	3	4	4	5	4	6	2	2	3	2
6826	2	1	1	3	0	1	1	2	0	0	0	2	1	1	3	0	1	1	2	0	0	0	4	4	4	2	1	1	3	1	3	4	2	4	2	4	4	4	3	5	2	2	3	4
6827	2	1	1	3	0	1	1	2	0	0	0	2	1	1	3	0	1	1	2	0	0	0	4	3	2	2	97	97	-8	-8	-8	4	4	-8	-8	-8	2	4	3	4	2	3	3	-8
6828	2	1	1	3	0	1	1	2	0	0	0	2	1	1	3	0	1	1	2	0	0	0	3	4	4	2	1	1	1	1	1	2	4	4	3	2	4	2	1	3	1	2	3	3
6829	2	1	1	3	0	1	1	2	0	0	0	2	1	1	3	0	1	1	2	0	0	0	4	2	4	2	97	97	1	1	1	2	4	2	2	4	4	5	4	6	5	1	1	1
6830	2	1	1	3	0	1	1	2	0	0	0	2	1	1	3	0	1	1	2	0	0	0	4	4	5	2	1	1	3	3	1	2	5	4	2	2	2	5	2	8	4	1	1	1
6831	2	1	1	3	0	1	1	2	0	0	0	2	1	1	3	0	1	1	2	0	0	0	2	2	2	2	1	1	2	1	1	2	5	4	4	4	4	5	3	6	2	2	3	4
6832	2	1	1	3	0	1	1	2	0	0	0	2	1	1	3	0	1	1	2	0	0	0	4	4	4	2	1	1	3	1	1	1	4	4	2	1	2	7	4	8	3	2	1	2
6833	2	1	1	3	0	1	1	2	0	0	0	2	1	1	3	0	1	1	2	0	0	0	2	2	2	2	1	1	3	1	1	3	2	3	3	2	4	2	2	3	2	2	3	5
6834	2	1	1	3	0	1	1	2	0	0	0	2	1	1	3	0	1	1	2	0	0	0	4	2	3	1	1	0	2	2	2	2	3	3	4	4	4	1	1	2	1	2	1	4
6835	2	1	1	3	0	1	1	2	0	0	0	2	1	1	3	0	1	1	2	0	0	0	4	3	3	2	1	1	2	1	3	1	4	4	4	4	4	3	3	4	2	2	3	-8
6836	2	1	1	3	0	1	1	2	0	0	0	2	1	1	3	0	1	1	2	0	0	0	3	4	4	5	3	2	1	1	1	2	4	5	3	3	4	6	4	7	2	1	2	1
6837	2	1	1	3	0	1	1	2	0	0	0	2	1	1	3	0	1	1	2	0	0	0	2	3	4	2	1	1	4	1	1	2	2	4	4	2	3	4	6	1	1	2	3	5
6838	2	1	1	3	0	1	1	2	0	0	0	2	1	1	3	0	1	1	2	0	0	0	2	4	5	2	-2	-2	1	1	1	2	4	4	4	2	4	5	4	6	2	1	3	4
6839	2	1	1	3	0	1	1	2	0	0	0	2	1	1	3	0	1	1	2	0	0	0	3	5	5	-3	-3	-3	3	3	3	-8	4	3	3	3	3	5	5	4	4	2	1	3
6840	2	1	1	3	0	1	1	2	0	0	0	2	1	1	3	0	1	1	2	0	0	0	4	3	4	2	1	1	1	1	1	3	3	3	3	3	3	3	4	3	1	1	3	2
6841	2	1	1	3	0	1	1	2	0	0	0	2	1	1	3	0	1	1	2	0	0	0	3	2	4	97	97	97	1	1	1	2	4	3	3	2	4	5	4	3	5	1	3	2
6842	2	1	1	3	0	1	1	2	0	0	0	2	1	1	3	0	1	1	2	0	0	0	3	2	3	2	1	1	3	2	2	2	2	4	1	1	5	3	3	3	3	1	3	3
6843	2	1	1	3	0	1	1	2	0	0	0	2	1	1	3	0	1	1	2	0	0	0	4	5	5	2	2	0	2	1	1	2	2	2	2	1	5	4	2	5	8	2	3	4
6844	2	1	1	3	0	1	1	2	0	0	0	2	1	1	3	0	1	1	2	0	0	0	5	2	3	2	1	1	3	2	3	2	4	4	4	4	4	6	5	-8	4	2	3	2
6845	2	1	1	3	0	1	1	2	0	0	0	2	1	1	3	0	1	1	2	0	0	0	4	2	2	2	1	1	3	3	-8	2	3	4	2	-8	5	9	1	10	1	1	3	3
6846	2	1	1	3	0	1	1	2	0	0	0	2	1	1	3	0	1	1	2	0	0	0	2	3	4	1	97	97	3	2	3	4	4	3	3	2	4	3	2	4	2	2	3	3
6847	2	1	1	3	0	1	1	2	0	0	0	2	1	1	3	0	1	1	2	0	0	0	4	3	3	2	1	1	2	1	1	3	4	4	3	2	3	3	2	3	1	1	3	4
6848	2	1	1	3	0	1	1	2	0	0	0	2	1	1	3	0	1	1	2	0	0	0	2	4	4	3	1	2	2	2	-8	2	5	2	4	4	5	2	1	2	2	1	3	4
6849	2	1	1	3	0	1	1	2	0	0	0	2	1	1	3	0	1	1	2	0	0	0	4	4	4	2	1	1	3	1	1	2	2	2	1	1	4	3	2	7	2	1	3	4
6850	2	1	1	3	0	1	1	2	0	0	0	2	1	1	3	0	1	1	2	0	0	0	2	4	4	1	1	0	2	1	1	2	2	2	2	2	4	4	2	5	1	2	3	2
6851	2	1	1	3	0	1	1	2	0	0	0	2	1	1	3	0	1	1	2	0	0	0	3	4	4	2	97	97	3	2	3	4	4	3	3	2	4	5	4	5	3	1	3	3
6852	2	1	1	3	0	1	1	2	0	0	0	2	1	1	3	0	1	1	2	0	0	0	4	3	2	2	97	97	3	1	1	1	3	3	4	2	3	1	5	1	3	1	2	2
6853	2	1	1	3	0	1	1	2	0	0	0	2	1	1	3	0	1	1	2	0	0	0	5	1	4	2	1	1	1	1	1	4	5	5	1	1	2	5	3	5	2	2	3	-8
6854	2	1	1	3	0	1	1	2	0	0	0	2	1	1	3	0	1	1	2	0	0	0	4	4	4	1	1	0	1	1	2	4	3	2	2	1	1	5	5	7	2	2	3	2
6855	2	1	1	3	0	1	1	2	0	0	0	2	1	1	3	0	1	1	2	0	0	0	2	4	4	2	1	1	1	1	1	2	4	2	4	2	4	5	3	7	1	1	3	4
6856	2	1	1	3	0	1	1	2	0	0	0	2	1	1	3	0	1	1	2	0	0	0	4	4	4	3	1	2	2	2	1	4	4	3	3	2	4	6	5	7	3	2	2	2
6857	2	1	1	3	0	1	1	2	0	0	0	2	1	1	3	0	1	1	2	0	0	0	4	2	4	2	1	1	1	1	3	3	3	2	3	2	4	4	6	3	3	2	3	2
6858	2	1	1	3	0	1	1	2	0	0	0	2	1	1	3	0	1	1	2	0	0	0	2	4	4	2	2	0	2	1	1	1	4	4	3	3	4	1	5	1	1	2	1	4
6859	2	1	1	3	0	1	1	2	0	0	0	2	1	1	3	0	1	1	2	0	0	0	5	1	4	2	1	1	3	1	3	4	2	2	2	1	4	5	1	5	1	2	3	2
6860	2	1	1	3	0	1	1	2	0	0	0	2	1	1	3	0	1	1	2	0	0	0	4	5	5	2	1	1	1	1	1	1	5	3	1	4	3	5	3	5	2	2	3	3
6861	2	1	1	3	0	1	1	2	0	0	0	2	1	1	3	0	1	1	2	0	0	0	2	4	3	2	1	1	2	1	2	4	2	2	2	1	5	2	2	2	3	2	3	4
6862	2	1	1	3	0	1	1	2	0	0	0	2	1	1	3	0	1	1	2	0	0	0	2	4	4	2	1	1	2	1	1	2	4	2	3	2	2	5	6	6	4	1	3	4
6863	2	1	1	3	0	1	1	2	0	0	0	2	1	1	3	0	1	1	2	0	0	0	4	3	3	1	1	0	1	1	1	2	4	4	4	3	4	4	3	6	2	2	3	4
6864	2	1	1	3	0	1	1	2	0	0	0	2	1	1	3	0	1	1	2	0	0	0	3	4	4	1	97	97	3	2	3	3	5	4	3	2	4	6	5	7	5	2	1	2
6865	2	1	1	3	0	1	1	2	0	0	0	2	1	1	3	0	1	1	2	0	0	0	2	1	4	2	1	1	4	1	1	4	4	4	3	2	4	2	2	3	2	2	3	2
6866	2	1	1	3	0	1	1	2	0	0	0	2	1	1	3	0	1	1	2	0	0	0	2	4	5	2	1	1	1	1	1	2	4	4	5	2	4	8	6	9	3	1	1	4
6867	2	1	1	3	0	1	1	2	0	0	0	2	1	1	3	0	1	1	2	0	0	0	4	2	4	2	1	1	5	1	1	2	5	4	5	2	4	5	3	7	3	2	3	4
6868	2	1	1	3	0	1	1	2	0	0	0	2	1	1	3	0	1	1	2	0	0	0	4	2	4	3	1	2	5	1	1	4	2	2	2	2	4	5	3	-8	4	2	3	5
6869	2	1	1	3	0	1	1	2	0	0	0	2	1	1	3	0	1	1	2	0	0	0	2	3	4	97	97	97	1	1	1	2	5	2	2	2	4	5	1	6	1	1	2	2
6870	2	1	1	3	0	1	1	2	0	0	0	2	1	1	3	0	1	1	2	0	0	0	2	4	4	2	1	1	1	1	1	2	4	4	3	2	4	4	2	5	2	1	3	3
6871	2	1	1	3	0	1	1	2	0	0	0	2	1	1	3	0	1	1	2	0	0	0	4	4	2	2	1	1	2	2	2	2	4	2	2	2	4	3	3	3	2	2	3	3
6872	2	1	1	3	0	1	1	2	0	0	0	2	1	1	3	0	1	1	2	0	0	0	4	2	3	1	1	0	4	2	2	4	2	2	4	4	4	5	4	6	5	2	3	3
6873	2	1	1	3	0	1	1	2	0	0	0	2	1	1	3	0	1	1	2	0	0	0	-8	2	3	1	1	0	2	1	1	2	2	2	2	2	3	5	3	6	2	2	3	4
6874	2	1	1	3	0	1	1	2	0	0	0	2	1	1	3	0	1	1	2	0	0	0	3	3	4	2	1	1	3	3	4	2	4	4	5	5	4	1	1	1	1	2	3	3
6875	2	1	1	3	0	1	1	2	0	0	0	2	1	1	3	0	1	1	2	0	0	0	1	1	3	1	97	97	2	1	2	1	2	2	3	2	4	3	4	2	3	3	3	2
6876	2	1	1	3	0	1	1	2	0	0	0	2	1	1	3	0	1	1	2	0	0	0	4	2	4	2	-2	-2	1	1	1	2	4	1	2	2	4	3	4	5	1	1	3	2
6877	2	1	1	3	0	1	1	2	0	0	0	2	1	1	3	0	1	1	2	0	0	0	2	1	4	4	2	2	4	2	2	2	4	4	4	4	4	5	1	5	1	2	3	2
6878	2	1	1	3	0	1	1	2	0	0	0	2	1	1	3	0	1	1	2	0	0	0	4	4	4	1	97	97	5	1	1	2	1	1	1	1	5	3	2	3	1	1	1	3
6879	2	1	1	3	0	1	1	2	0	0	0	2	1	1	3	0	1	1	2	0	0	0	4	4	4	2	1	1	1	1	1	2	2	2	4	2	4	5	5	6	7	1	3	3
6880	2	1	1	3	0	1	1	2	0	0	0	2	1	1	3	0	1	1	2	0	0	0	2	3	4	4	2	2	2	1	1	2	2	2	2	2	5	3	4	3	3	1	3	4
6881	2	1	1	3	0	1	1	2	0	0	0	2	1	1	3	0	1	1	2	0	0	0	4	3	4	3	3	0	1	1	1	2	4	4	4	4	5	3	2	4	1	2	3	4
6882	2	1	1	3	0	1	1	2	0	0	0	2	1	1	3	0	1	1	2	0	0	0	3	4	4	2	2	0	3	1	1	2	5	4	4	3	4	5	3	6	7	2	3	4
6883	2	1	1	3	0	1	1	2	0	0	0	2	1	1	3	0	1	1	2	0	0	0	3	3	4	2	1	1	1	1	1	2	4	4	3	4	4	4	3	4	2	2	3	3
6884	2	1	1	3	0	1	1	2	0	0	0	2	1	1	3	0	1	1	2	0	0	0	3	4	4	3	1	2	1	1	1	3	3	2	2	2	4	5	4	5	2	1	3	2
6885	2	1	1	3	0	1	1	2	0	0	0	2	1	1	3	0	1	1	2	0	0	0	3	4	4	3	2	1	3	1	1	3	4	4	4	4	2	4	2	5	2	1	3	3
6886	2	1	1	3	0	1	1	2	0	0	0	2	1	1	3	0	1	1	2	0	0	0	3	2	2	2	1	1	2	1	1	4	3	3	3	3	3	2	2	2	3	2	3	3
6887	2	1	1	3	0	1	1	2	0	0	0	2	1	1	3	0	1	1	2	0	0	0	4	2	4	2	97	97	3	2	2	3	4	3	4	2	4	4	4	6	4	2	3	4
6888	2	1	1	3	0	1	1	2	0	0	0	2	1	1	3	0	1	1	2	0	0	0	2	4	4	2	1	1	2	1	1	2	4	4	4	2	3	4	3	4	2	1	3	4
6889	2	1	1	3	0	1	1	2	0	0	0	2	1	1	3	0	1	1	2	0	0	0	4	5	5	2	1	1	1	1	1	4	2	2	2	2	5	5	5	6	5	1	3	2
6890	2	1	1	3	0	1	1	2	0	0	0	2	1	1	3	0	1	1	2	0	0	0	3	2	4	1	0	1	4	1	3	2	3	-8	2	2	5	1	1	-8	3	2	3	3
6891	2	1	1	3	0	1	1	2	0	0	0	2	1	1	3	0	1	1	2	0	0	0	1	4	1	4	4	0	1	1	1	2	2	2	2	1	3	5	5	5	3	2	3	3
6892	2	1	1	3	0	1	1	2	0	0	0	2	1	1	3	0	1	1	2	0	0	0	4	2	4	1	1	0	1	1	1	2	4	5	5	2	2	2	1	3	1	1	3	2
6893	2	1	1	3	0	1	1	2	0	0	0	2	1	1	3	0	1	1	2	0	0	0	4	4	5	2	2	0	3	1	1	4	5	5	5	2	5	7	5	8	2	1	1	2
6894	2	1	1	3	0	1	1	2	0	0	0	2	1	1	3	0	1	1	2	0	0	0	2	2	4	2	2	0	3	1	1	2	5	1	4	2	4	4	3	-8	3	2	3	5
6895	2	1	1	3	0	1	1	2	0	0	0	2	1	1	3	0	1	1	2	0	0	0	3	4	4	2	1	1	3	1	3	2	4	3	2	2	4	6	5	8	3	2	1	4
6896	2	1	1	3	0	1	1	2	0	0	0	2	1	1	3	0	1	1	2	0	0	0	4	1	3	2	1	1	4	1	1	4	3	2	4	2	5	4	3	5	3	1	3	3
6897	2	1	1	3	0	1	1	2	0	0	0	2	1	1	3	0	1	1	2	0	0	0	4	1	3	1	0	1	3	1	1	2	4	3	3	2	4	5	3	5	3	3	3	2
6898	2	1	1	3	0	1	1	2	0	0	0	2	1	1	3	0	1	1	2	0	0	0	4	4	4	2	1	1	2	2	-8	3	2	2	1	2	4	5	4	5	5	1	1	4
6899	2	1	1	3	0	1	1	2	0	0	0	2	1	1	3	0	1	1	2	0	0	0	3	2	3	3	1	2	4	2	3	2	4	3	4	3	4	3	4	5	1	1	3	2
6900	2	1	1	3	0	1	1	2	0	0	0	2	1	1	3	0	1	1	2	0	0	0	4	4	2	2	1	1	1	1	1	4	4	5	4	3	4	4	4	4	4	1	3	4
6901	2	1	1	3	0	1	1	2	0	0	0	2	1	1	3	0	1	1	2	0	0	0	3	4	4	3	97	97	3	3	3	4	5	3	4	3	5	3	1	3	2	2	3	2
6902	2	1	1	3	0	1	1	2	0	0	0	2	1	1	3	0	1	1	2	0	0	0	4	4	4	2	0	2	2	1	1	3	4	2	2	2	4	5	3	5	2	1	3	2
6903	2	1	1	3	0	1	1	2	0	0	0	2	1	1	3	0	1	1	2	0	0	0	2	2	4	1	0	1	3	1	3	4	2	2	4	2	4	5	3	7	3	2	1	4
6904	2	1	1	3	0	1	1	2	0	0	0	2	1	1	3	0	1	1	2	0	0	0	2	2	3	2	1	1	2	1	1	1	3	2	4	2	3	4	5	5	3	2	3	4
6905	2	1	1	3	0	1	1	2	0	0	0	2	1	1	3	0	1	1	2	0	0	0	2	2	4	2	1	1	1	1	1	2	5	4	3	1	4	5	3	5	1	2	3	2
6906	2	1	1	3	0	1	1	2	0	0	0	2	1	1	3	0	1	1	2	0	0	0	5	3	5	2	1	1	1	1	3	3	5	3	5	3	5	5	1	5	-8	2	2	3
6907	2	1	1	3	0	1	1	2	0	0	0	2	1	1	3	0	1	1	2	0	0	0	4	4	4	2	1	1	2	1	1	2	4	4	2	2	2	4	3	5	2	2	3	4
6908	2	1	1	3	0	1	1	2	0	0	0	2	1	1	3	0	1	1	2	0	0	0	3	3	4	1	0	1	-8	1	1	2	5	4	4	-8	3	2	1	3	1	2	3	-8
6909	2	1	1	3	0	1	1	2	0	0	0	2	1	1	3	0	1	1	2	0	0	0	3	2	4	5	2	3	1	1	1	1	4	4	2	2	4	4	5	5	2	1	3	2
6910	2	1	1	3	0	1	1	2	0	0	0	2	1	1	3	0	1	1	2	0	0	0	4	4	4	5	2	3	3	1	3	2	4	4	4	-8	4	5	4	5	3	2	3	2
6911	2	1	1	3	0	1	1	2	0	0	0	2	1	1	3	0	1	1	2	0	0	0	2	4	4	2	1	1	4	1	1	2	5	3	3	3	2	5	5	5	5	2	3	2
6912	2	1	1	3	0	1	1	2	0	0	0	2	1	1	3	0	1	1	2	0	0	0	3	2	3	2	1	1	4	3	2	4	2	3	4	2	3	5	5	6	6	2	3	4
6913	2	1	1	3	0	1	1	2	0	0	0	2	1	1	3	0	1	1	2	0	0	0	4	4	4	2	1	1	1	1	1	1	5	5	5	5	-8	1	1	1	1	-8	3	-8
6914	2	1	1	3	0	1	1	2	0	0	0	2	1	1	3	0	1	1	2	0	0	0	3	4	4	2	1	1	3	2	4	4	2	1	2	1	4	5	3	6	3	2	1	2
6915	2	1	1	3	0	1	1	2	0	0	0	2	1	1	3	0	1	1	2	0	0	0	2	2	4	2	1	1	1	1	1	2	4	4	2	4	4	5	5	5	5	1	3	3
6916	2	1	1	3	0	1	1	2	0	0	0	2	1	1	3	0	1	1	2	0	0	0	4	2	2	2	1	1	2	1	2	2	2	2	2	2	5	3	1	5	1	2	3	4
6917	2	1	1	3	0	1	1	2	0	0	0	2	1	1	3	0	1	1	2	0	0	0	2	3	4	2	1	1	1	1	3	2	3	3	1	2	4	3	3	3	1	1	3	3
6918	2	1	1	3	0	1	1	2	0	0	0	2	1	1	3	0	1	1	2	0	0	0	2	4	4	2	1	1	2	1	1	1	4	4	5	2	5	5	5	5	5	1	2	2
6919	2	1	1	3	0	1	1	2	0	0	0	2	1	1	3	0	1	1	2	0	0	0	4	2	3	2	1	1	1	1	1	1	2	2	1	1	4	2	1	3	1	1	3	4
6920	2	1	1	3	0	1	1	2	0	0	0	2	1	1	3	0	1	1	2	0	0	0	5	1	1	1	1	0	2	2	2	1	4	4	3	2	3	2	3	2	2	3	3	5
6921	2	1	1	3	0	1	1	2	0	0	0	2	1	1	3	0	1	1	2	0	0	0	3	4	2	3	1	2	2	1	2	4	2	2	4	2	4	5	2	8	4	2	3	3
6922	2	1	1	3	0	1	1	2	0	0	0	2	1	1	3	0	1	1	2	0	0	0	4	1	4	2	97	97	1	1	3	4	2	2	2	1	4	6	4	-8	4	2	3	2
6923	2	1	1	3	0	1	1	2	0	0	0	2	1	1	3	0	1	1	2	0	0	0	3	4	4	2	1	1	1	1	1	4	3	3	4	2	4	6	3	6	3	2	3	3
6924	2	1	1	3	0	1	1	2	0	0	0	2	1	1	3	0	1	1	2	0	0	0	2	1	3	97	97	97	1	1	1	4	3	4	3	2	4	2	2	2	2	1	3	3
6925	2	1	1	3	0	1	1	2	0	0	0	2	1	1	3	0	1	1	2	0	0	0	4	4	4	2	1	1	1	1	1	4	2	2	4	2	4	7	5	9	3	2	3	4
6926	2	1	1	3	0	1	1	2	0	0	0	2	1	1	3	0	1	1	2	0	0	0	4	4	4	1	1	0	2	2	2	2	4	4	2	1	4	5	4	6	4	1	3	2
6927	2	1	1	3	0	1	1	2	0	0	0	2	1	1	3	0	1	1	2	0	0	0	4	1	4	2	1	1	1	1	3	2	5	5	3	2	4	5	5	5	3	1	3	2
6928	2	1	1	3	0	1	1	2	0	0	0	2	1	1	3	0	1	1	2	0	0	0	4	2	2	2	1	1	1	1	1	4	4	4	4	2	5	4	4	5	3	1	3	4
6929	2	1	1	3	0	1	1	2	0	0	0	2	1	1	3	0	1	1	2	0	0	0	2	4	4	1	1	0	3	1	1	4	3	3	3	3	4	5	5	10	5	-8	3	-8
6930	2	1	1	3	0	1	1	2	0	0	0	2	1	1	3	0	1	1	2	0	0	0	4	3	4	1	1	0	2	1	3	4	2	2	2	2	4	6	5	7	4	2	3	4
6931	2	1	1	3	0	1	1	2	0	0	0	2	1	1	3	0	1	1	2	0	0	0	4	2	4	3	1	2	2	1	3	4	4	2	4	1	5	6	5	6	5	1	3	3
6932	2	1	1	3	0	1	1	2	0	0	0	2	1	1	3	0	1	1	2	0	0	0	4	2	2	1	97	97	5	1	1	3	2	2	4	2	5	4	3	5	3	2	3	5
6933	2	1	1	3	0	1	1	2	0	0	0	2	1	1	3	0	1	1	2	0	0	0	3	4	5	2	2	0	4	1	2	2	4	4	4	3	4	4	3	5	3	2	3	4
6934	2	1	1	3	0	1	1	2	0	0	0	2	1	1	3	0	1	1	2	0	0	0	3	2	3	97	97	97	3	1	3	1	2	2	2	2	2	3	3	-8	3	2	3	3
6935	2	1	1	3	0	1	1	2	0	0	0	2	1	1	3	0	1	1	2	0	0	0	3	4	4	2	97	97	2	1	1	4	4	4	2	2	4	5	4	7	3	3	3	4
6936	2	1	1	3	0	1	1	2	0	0	0	2	1	1	3	0	1	1	2	0	0	0	4	2	3	-3	-3	-3	2	1	-8	1	4	4	5	-8	2	3	2	3	2	1	1	4
6937	2	1	1	3	0	1	1	2	0	0	0	2	1	1	3	0	1	1	2	0	0	0	3	4	4	2	1	1	3	2	2	2	4	1	5	3	4	2	2	2	2	2	3	3
6938	2	1	1	3	0	1	1	2	0	0	0	2	1	1	3	0	1	1	2	0	0	0	2	4	4	2	1	1	2	2	-8	2	4	4	4	4	5	4	3	6	3	1	3	4
6939	2	1	1	3	0	1	1	2	0	0	0	2	1	1	3	0	1	1	2	0	0	0	4	3	3	2	2	0	2	1	1	2	4	4	3	3	3	1	5	1	3	1	3	1
6940	2	1	1	3	0	1	1	2	0	0	0	2	1	1	3	0	1	1	2	0	0	0	4	2	2	1	0	1	3	1	3	4	1	1	1	1	5	6	1	9	1	2	2	5
6941	2	1	1	3	0	1	1	2	0	0	0	2	1	1	3	0	1	1	2	0	0	0	2	4	4	2	1	1	1	1	1	2	5	5	5	4	4	3	3	3	3	2	3	-8
6942	2	1	1	3	0	1	1	2	0	0	0	2	1	1	3	0	1	1	2	0	0	0	4	4	4	2	1	1	2	1	1	2	3	2	2	2	4	7	5	7	5	2	3	3
6943	2	1	1	3	0	1	1	2	0	0	0	2	1	1	3	0	1	1	2	0	0	0	2	4	5	3	2	1	1	1	-8	4	1	1	5	-8	5	5	5	5	5	1	2	4
6944	2	1	1	3	0	1	1	2	0	0	1	2	1	1	3	0	1	1	2	0	0	1	2	4	5	2	1	1	1	1	1	2	1	1	5	1	5	5	3	7	5	2	3	1
6945	2	1	1	3	0	1	1	2	0	0	1	2	1	1	3	0	1	1	2	0	0	1	3	3	2	2	1	1	2	2	2	2	2	2	2	2	5	1	1	1	1	1	3	3
6946	2	1	1	3	0	1	1	2	0	0	1	2	1	1	3	0	1	1	2	0	0	1	4	2	4	1	97	97	3	2	3	2	4	4	4	2	4	5	5	6	4	2	2	4
6947	2	1	1	3	0	1	1	2	0	0	1	2	1	1	3	0	1	1	2	0	0	1	3	4	2	1	0	1	2	2	2	2	5	5	3	3	5	1	1	3	1	1	-8	3
6948	2	1	1	3	0	1	1	2	0	0	1	2	1	1	3	0	1	1	2	0	0	1	2	4	4	2	1	1	1	1	1	2	4	2	5	3	5	5	5	5	4	2	3	2
6949	2	1	1	3	0	1	1	2	0	0	1	2	1	1	3	0	1	1	2	0	0	1	4	2	4	2	1	1	1	1	2	4	5	4	4	2	4	5	4	6	3	1	3	2
6950	2	1	1	3	0	1	1	2	0	0	1	2	1	1	3	0	1	1	2	0	0	1	3	3	3	1	1	0	3	-8	3	2	1	1	1	1	1	3	5	5	3	2	3	3
6951	2	1	1	3	0	1	1	2	0	0	1	2	1	1	3	0	1	1	2	0	0	1	4	3	3	2	1	1	2	1	1	4	4	2	1	1	4	4	2	-8	2	1	3	2
6952	2	1	1	3	0	1	1	2	0	0	1	2	1	1	3	0	1	1	2	0	0	1	4	4	4	1	1	0	1	1	1	2	4	4	-8	2	4	5	4	6	6	1	2	5
6953	2	1	1	3	0	1	1	2	0	0	1	2	1	1	3	0	1	1	2	0	0	1	2	4	5	2	1	1	2	1	1	2	3	2	2	2	5	5	4	5	2	1	3	1
6954	2	1	1	3	0	1	1	2	0	0	1	2	1	1	3	0	1	1	2	0	0	1	4	4	4	3	1	2	2	1	1	2	4	2	4	4	4	2	2	2	2	1	1	4
6955	2	1	1	3	0	1	1	2	0	0	1	2	1	1	3	0	1	1	2	0	0	1	2	4	5	3	0	3	1	1	1	2	4	4	4	4	4	7	5	9	2	2	3	2
6956	2	1	1	3	0	1	1	2	0	0	1	2	1	1	3	0	1	1	2	0	0	1	2	2	4	2	1	1	3	1	1	2	3	5	4	1	4	5	2	6	5	2	3	4
6957	2	1	1	3	0	1	1	2	0	0	1	2	1	1	3	0	1	1	2	0	0	1	2	4	4	1	97	97	-8	-8	-8	3	2	2	4	3	4	5	4	5	7	1	1	2
6958	2	1	1	3	0	1	1	2	0	0	1	2	1	1	3	0	1	1	2	0	0	1	4	3	4	2	1	1	1	1	1	2	2	3	5	2	4	7	7	5	3	1	3	2
6959	2	1	1	3	0	1	1	2	0	0	1	2	1	1	3	0	1	1	2	0	0	1	3	4	4	2	1	1	3	2	3	2	2	2	4	2	4	1	3	1	2	1	3	4
6960	2	1	1	3	0	1	1	2	0	0	1	2	1	1	3	0	1	1	2	0	0	1	4	5	3	2	1	1	1	1	1	1	2	4	2	2	4	4	3	-8	3	2	3	3
6961	2	1	1	3	0	1	1	2	0	0	1	2	1	1	3	0	1	1	2	0	0	1	2	4	3	2	1	1	3	1	1	2	4	2	2	2	4	4	6	7	5	2	3	4
6962	2	1	1	3	0	1	1	2	0	0	1	2	1	1	3	0	1	1	2	0	0	1	4	4	5	2	1	1	3	1	1	2	2	1	2	1	2	4	2	6	2	1	2	3
6963	2	1	1	3	0	1	1	2	0	0	1	2	1	1	3	0	1	1	2	0	0	1	2	4	4	4	3	1	1	1	1	4	4	4	3	2	4	5	5	6	3	2	3	2
6964	2	1	1	3	0	1	1	2	0	0	1	2	1	1	3	0	1	1	2	0	0	1	2	5	5	2	1	1	2	1	1	3	2	1	1	3	4	5	3	5	7	2	2	1
6965	2	1	1	3	0	1	1	2	0	0	1	2	1	1	3	0	1	1	2	0	0	1	4	4	4	2	1	1	3	1	1	3	3	3	2	2	3	-8	-8	-8	-8	2	3	3
6966	2	1	1	3	0	1	1	2	0	0	1	2	1	1	3	0	1	1	2	0	0	1	4	2	3	3	2	1	1	1	1	1	5	4	4	2	2	5	4	5	2	2	3	2
6967	2	1	1	3	0	1	1	2	0	0	1	2	1	1	3	0	1	1	2	0	0	1	4	3	4	2	1	1	4	1	1	1	4	2	3	4	4	5	5	5	4	2	2	3
6968	2	1	1	3	0	1	1	2	0	0	1	2	1	1	3	0	1	1	2	0	0	1	3	3	2	2	1	1	1	1	3	4	1	1	1	1	5	5	3	8	6	3	2	4
6969	2	1	1	3	0	1	1	2	0	0	1	2	1	1	3	0	1	1	2	0	0	1	4	4	4	2	1	1	1	1	1	4	4	4	4	4	4	6	3	5	2	1	3	4
6970	2	1	1	3	0	1	1	2	0	0	1	2	1	1	3	0	1	1	2	0	0	1	3	4	4	2	1	1	2	1	1	2	4	4	4	4	5	3	3	3	2	1	2	4
6971	2	1	1	3	0	1	1	2	0	0	1	2	1	1	3	0	1	1	2	0	0	1	1	1	4	2	97	97	2	2	1	4	2	1	5	2	2	4	5	5	4	1	1	2
6972	2	1	1	3	0	1	1	2	0	0	1	2	1	1	3	0	1	1	2	0	0	1	-8	3	4	1	0	1	-8	-8	4	2	3	3	3	2	3	1	1	-8	1	3	-8	2
6973	2	1	1	3	0	1	1	2	0	0	1	2	1	1	3	0	1	1	2	0	0	1	2	3	4	-2	-3	-3	-8	-8	-8	1	4	5	5	1	5	1	1	1	1	2	2	-8
6974	2	1	1	3	0	1	1	2	0	0	1	2	1	1	3	0	1	1	2	0	0	1	2	4	5	97	97	97	2	1	2	2	2	2	4	2	5	6	7	8	5	1	3	4
6975	2	1	1	3	0	1	1	2	0	0	1	2	1	1	3	0	1	1	2	0	0	1	2	5	5	2	1	1	3	1	3	4	1	1	4	1	5	4	5	7	6	2	3	1
6976	2	1	1	3	0	1	1	2	0	0	1	2	1	1	3	0	1	1	2	0	0	1	2	3	4	2	2	0	2	2	-8	2	2	2	2	3	1	7	5	8	2	1	3	2
6977	2	1	1	3	0	1	1	2	0	0	1	2	1	1	3	0	1	1	2	0	0	1	1	4	5	2	0	2	5	3	3	4	5	2	4	2	5	4	3	5	1	1	3	3
6978	2	1	1	3	0	1	1	2	0	0	1	2	1	1	3	0	1	1	2	0	0	1	3	3	4	3	1	2	3	3	3	2	4	5	5	4	5	3	2	3	1	2	1	3
6979	2	1	1	3	0	1	1	2	0	0	1	2	1	1	3	0	1	1	2	0	0	1	4	4	5	2	97	97	1	1	1	1	2	2	2	2	4	3	2	-8	1	1	3	4
6980	2	1	1	3	0	1	1	2	0	0	1	2	1	1	3	0	1	1	2	0	0	1	2	4	3	2	1	1	3	1	3	2	4	4	4	2	4	5	3	6	3	1	3	2
6981	2	1	1	3	0	1	1	2	0	0	1	2	1	1	3	0	1	1	2	0	0	1	2	1	4	97	97	97	1	1	1	2	4	3	4	2	4	5	5	-8	4	2	3	2
6982	2	1	1	3	0	1	1	2	0	0	1	2	1	1	3	0	1	1	2	0	0	1	4	3	3	2	1	1	3	1	3	2	5	3	4	3	4	5	4	-8	3	2	3	3
6983	2	1	1	3	0	1	1	2	0	0	1	2	1	1	3	0	1	1	2	0	0	1	1	4	4	2	1	1	1	1	1	4	1	1	4	1	5	6	6	6	5	2	1	2
6984	2	1	1	3	0	1	1	2	0	0	1	2	1	1	3	0	1	1	2	0	0	1	2	4	4	2	1	1	1	1	1	1	3	2	2	3	4	4	2	6	2	-8	3	3
6985	2	1	1	3	0	1	1	2	0	0	1	2	1	1	3	0	1	1	2	0	0	1	3	2	3	2	1	1	1	1	1	2	4	4	3	2	4	6	6	7	4	1	3	2
6986	2	1	1	3	0	1	1	2	0	0	1	2	1	1	3	0	1	1	2	0	0	1	2	4	3	3	1	2	3	1	1	2	3	3	3	3	5	5	5	5	5	2	1	3
6987	2	1	1	3	0	1	1	2	0	0	1	2	1	1	3	0	1	1	2	0	0	1	2	3	5	96	97	97	3	3	-8	2	4	1	1	1	2	2	2	2	2	2	3	4
6988	2	1	1	3	0	1	1	2	0	0	1	2	1	1	3	0	1	1	2	0	0	1	3	3	4	2	1	1	1	1	1	2	4	4	4	4	4	5	5	6	4	1	-8	3
6989	2	1	1	3	0	2	1	2	0	0	0	2	1	1	3	0	2	1	2	0	0	0	3	4	4	5	2	3	2	1	4	1	4	3	4	3	3	3	3	3	3	1	2	3
6990	2	1	1	3	0	2	1	2	0	0	0	2	1	1	3	0	2	1	2	0	0	0	1	4	4	2	1	1	1	1	1	1	4	5	5	5	5	5	3	6	1	1	3	1
6991	2	1	1	3	0	2	1	2	0	0	0	2	1	1	3	0	2	1	2	0	0	0	5	1	4	97	97	97	5	2	2	3	1	1	2	1	5	5	5	-8	4	3	2	2
6992	2	1	1	3	0	2	1	2	0	0	0	2	1	1	3	0	2	1	2	0	0	0	5	2	4	1	97	97	3	2	2	2	3	4	3	4	2	4	3	4	2	1	3	3
6993	2	1	1	3	0	2	1	2	0	0	0	2	1	1	3	0	2	1	2	0	0	0	2	3	3	1	1	0	3	2	2	2	4	2	2	2	4	3	2	-8	2	2	3	3
6994	2	1	1	3	0	2	1	2	0	0	0	2	1	1	3	0	2	1	2	0	0	0	1	2	5	2	0	2	3	1	1	4	2	2	2	2	5	3	2	5	1	2	2	3
6995	2	1	1	3	0	2	1	2	0	0	0	2	1	1	3	0	2	1	2	0	0	0	4	4	3	2	1	1	1	1	3	-8	5	3	4	2	3	1	1	-8	1	2	3	3
6996	2	1	1	3	0	2	1	2	0	0	0	2	1	1	3	0	2	1	2	0	0	0	-8	-8	-8	2	1	1	-8	-8	-8	-8	3	3	3	3	3	1	1	1	1	3	3	3
6997	2	1	1	3	0	2	1	2	0	0	0	2	1	1	3	0	2	1	2	0	0	0	2	4	2	3	2	1	1	1	1	1	5	2	5	1	5	5	6	5	5	1	2	1
6998	2	1	1	3	0	2	1	2	0	0	0	2	1	1	3	0	2	1	2	0	0	0	5	3	4	1	1	0	2	2	-8	4	4	2	2	3	4	4	4	4	3	1	3	-8
6999	2	1	1	3	0	2	1	2	0	0	0	2	1	1	3	0	2	1	2	0	0	0	4	2	4	2	1	1	2	1	1	4	2	1	4	2	4	6	3	8	2	2	3	4
7000	2	1	1	3	0	2	1	2	0	0	0	2	1	1	3	0	2	1	2	0	0	0	2	4	5	2	1	1	1	1	2	4	2	2	2	2	4	5	2	6	3	2	3	2
7001	2	1	1	3	0	2	1	2	0	0	0	2	1	1	3	0	2	1	2	0	0	0	1	4	3	2	1	1	1	1	1	1	5	5	5	5	2	5	5	5	4	1	3	3
7002	2	1	1	3	0	2	1	2	0	0	0	2	1	1	3	0	2	1	2	0	0	0	3	3	4	2	1	1	3	1	3	2	4	3	3	3	4	2	1	4	1	1	3	2
7003	2	1	1	3	0	2	1	2	0	0	0	2	1	1	3	0	2	1	2	0	0	0	4	4	4	2	1	1	3	1	3	4	4	4	2	2	2	4	4	3	3	2	1	2
7004	2	1	1	3	0	2	1	2	0	0	0	2	1	1	3	0	2	1	2	0	0	0	1	4	3	2	1	1	1	1	1	2	5	4	3	1	5	5	5	7	5	2	3	3
7005	2	1	1	3	0	2	1	2	0	0	0	2	1	1	3	0	2	1	2	0	0	0	4	2	3	1	97	97	3	2	2	3	4	4	4	2	4	4	4	4	4	2	3	4
7006	2	1	1	3	0	2	1	2	0	0	0	2	1	1	3	0	2	1	2	0	0	0	3	4	3	97	97	97	1	1	3	1	1	1	5	1	1	5	2	5	2	1	3	2
7007	2	1	1	3	0	2	1	2	0	0	0	2	1	1	3	0	2	1	2	0	0	0	2	4	5	1	1	0	3	2	3	4	2	4	4	2	4	5	4	6	3	2	3	2
7008	2	1	1	3	0	2	1	2	0	0	0	2	1	1	3	0	2	1	2	0	0	0	4	1	3	2	1	1	2	2	1	4	1	2	5	4	5	2	1	5	3	1	3	4
7009	2	1	1	3	0	2	1	2	0	0	0	2	1	1	3	0	2	1	2	0	0	0	4	3	4	2	1	1	2	1	2	3	4	2	2	2	4	4	4	5	4	3	3	2
7010	2	1	1	3	0	2	1	2	0	0	0	2	1	1	3	0	2	1	2	0	0	0	3	2	5	2	1	1	1	1	-8	4	2	2	3	3	4	5	5	5	1	2	3	3
7011	2	1	1	3	0	2	1	2	0	0	0	2	1	1	3	0	2	1	2	0	0	0	3	4	2	97	97	97	1	1	-8	1	3	3	3	3	3	3	2	3	4	1	2	2
7012	2	1	1	3	0	2	1	2	0	0	0	2	1	1	3	0	2	1	2	0	0	0	3	3	3	2	1	1	4	1	1	2	4	4	3	2	4	5	5	6	4	2	3	3
7013	2	1	1	3	0	2	1	2	0	0	0	2	1	1	3	0	2	1	2	0	0	0	2	3	4	2	1	1	1	1	1	2	3	2	2	1	4	5	5	6	5	2	3	4
7014	2	1	1	3	0	2	1	2	0	0	0	2	1	1	3	0	2	1	2	0	0	0	3	2	5	1	97	97	3	2	3	2	4	4	4	2	4	5	5	8	5	2	3	3
7015	2	1	1	4	0	2	1	2	0	0	0	2	1	1	4	0	2	1	2	0	0	0	4	2	5	1	1	0	2	1	1	2	4	4	2	2	4	2	2	2	1	2	3	2
7016	2	1	1	4	0	2	1	2	0	0	0	2	1	1	4	0	2	1	2	0	0	0	3	4	4	2	1	1	3	1	3	2	2	3	4	2	4	5	5	5	5	2	-8	3
7017	2	1	1	4	0	2	1	2	0	0	0	2	1	1	4	0	2	1	2	0	0	0	2	2	4	1	97	97	3	1	1	4	4	4	3	2	4	5	4	6	4	2	3	2
7018	2	1	1	4	0	2	1	2	0	0	0	2	1	1	4	0	2	1	2	0	0	0	4	4	4	1	1	0	2	1	2	2	4	4	4	2	4	5	4	6	3	3	3	2
7019	2	1	1	4	0	2	1	2	0	0	0	2	1	1	4	0	2	1	2	0	0	0	3	3	3	1	1	0	2	1	1	2	2	2	2	3	4	5	3	6	4	2	2	2
7020	2	1	1	4	0	2	1	2	0	0	0	2	1	1	4	0	2	1	2	0	0	0	4	4	4	2	1	1	3	1	1	2	4	3	2	2	4	6	5	7	4	1	3	4
7021	2	1	1	4	0	2	1	2	0	0	0	2	1	1	4	0	2	1	2	0	0	0	2	2	2	2	1	1	1	1	1	2	4	4	2	2	4	3	3	7	2	1	3	4
7022	2	1	1	4	0	2	1	2	0	0	0	2	1	1	4	0	2	1	2	0	0	0	1	1	3	2	1	1	1	1	1	4	2	2	5	5	4	1	4	1	1	2	3	2
7023	2	1	1	4	0	2	1	2	0	1	3	2	1	1	4	0	2	1	2	0	1	3	3	5	5	1	97	97	1	1	3	2	1	1	2	1	5	5	3	7	9	2	3	5
7024	2	1	1	4	0	2	1	2	0	1	3	2	1	1	4	0	2	1	2	0	1	3	2	4	4	1	0	1	2	1	1	4	2	4	2	2	4	3	3	3	2	1	3	3
7025	2	1	1	4	0	2	1	2	0	1	3	2	1	1	4	0	2	1	2	0	1	3	2	3	5	5	3	2	1	1	-8	2	5	5	5	1	5	5	2	10	1	1	3	2
7026	2	1	1	4	0	2	1	2	0	1	3	2	1	1	4	0	2	1	2	0	1	3	5	1	3	1	0	1	1	1	1	4	2	4	2	1	5	5	2	9	3	3	3	2
7027	2	1	1	4	0	2	1	2	0	1	3	2	1	1	4	0	2	1	2	0	1	3	3	3	4	2	1	1	1	1	1	1	3	2	4	4	4	1	1	3	1	2	2	2
7028	2	1	1	4	0	2	1	2	0	1	3	2	1	1	4	0	2	1	2	0	1	3	2	4	4	2	1	1	4	1	3	2	2	2	2	2	5	4	2	5	5	1	3	2
7029	2	1	1	4	0	2	1	2	0	1	3	2	1	1	4	0	2	1	2	0	1	3	3	4	4	1	0	1	3	3	3	2	2	2	3	2	2	5	5	5	3	1	3	2
7030	2	1	1	4	0	2	1	2	0	1	3	2	1	1	4	0	2	1	2	0	1	3	2	4	5	3	2	1	4	1	-8	4	4	2	2	2	4	5	3	6	3	1	3	1
7031	2	1	1	4	0	2	1	2	0	1	3	2	1	1	4	0	2	1	2	0	1	3	2	4	4	3	2	1	2	1	1	2	4	4	4	2	2	2	1	2	1	2	3	2
7032	2	1	1	4	0	2	1	2	0	1	3	2	1	1	4	0	2	1	2	0	1	3	2	3	3	2	97	97	1	1	1	4	5	5	3	1	4	6	4	7	2	1	3	2
7033	2	1	1	4	0	2	1	2	0	1	3	2	1	1	4	0	2	1	2	0	1	3	2	4	4	2	97	97	1	1	-8	2	-8	2	3	2	4	5	5	5	2	2	3	2
7034	2	1	1	4	0	2	1	2	0	1	3	2	1	1	4	0	2	1	2	0	1	3	4	2	2	2	1	1	2	2	1	4	2	4	4	4	5	3	2	3	3	2	3	4
7035	2	1	1	4	0	2	1	2	0	1	3	2	1	1	4	0	2	1	2	0	1	3	4	3	4	2	1	1	4	1	3	4	2	1	3	2	4	4	3	4	4	2	3	2
7036	2	1	1	4	0	2	1	2	0	1	3	2	1	1	4	0	2	1	2	0	1	3	3	4	4	2	1	1	3	1	5	2	1	1	4	1	5	4	5	4	5	2	3	4
7037	2	1	1	4	0	2	1	2	0	1	3	2	1	1	4	0	2	1	2	0	1	3	3	4	4	2	2	0	1	1	1	2	4	4	4	5	4	4	1	7	1	2	3	2
7038	2	1	1	4	0	2	1	2	0	1	3	2	1	1	4	0	2	1	2	0	1	3	1	4	5	2	1	1	5	1	1	2	4	2	2	2	5	5	4	7	6	1	3	1
7039	2	1	1	4	0	2	1	2	0	1	3	2	1	1	4	0	2	1	2	0	1	3	3	2	3	2	1	1	1	1	1	2	1	1	3	1	4	3	6	6	3	2	2	4
7040	2	1	1	4	0	2	1	2	0	1	1	2	1	1	4	0	2	1	2	0	1	1	4	4	5	2	1	1	1	1	1	2	4	4	4	4	2	5	3	5	1	2	3	4
7041	2	1	1	4	0	2	1	2	0	1	1	2	1	1	4	0	2	1	2	0	1	1	4	3	1	1	1	0	5	3	1	2	2	2	2	1	4	1	1	-8	1	2	3	4
7042	2	1	1	4	0	2	1	2	0	1	1	2	1	1	4	0	2	1	2	0	1	1	4	2	4	2	1	1	3	2	1	4	3	2	3	2	3	2	1	3	2	2	3	2
7043	2	1	1	4	0	2	1	2	0	1	1	2	1	1	4	0	2	1	2	0	1	1	2	3	4	0	0	0	2	2	-8	2	5	1	4	4	4	4	3	5	3	1	3	4
7044	2	1	1	4	0	2	1	2	0	1	1	2	1	1	4	0	2	1	2	0	1	1	2	4	4	1	97	97	3	1	3	4	4	4	2	2	4	5	4	6	4	2	3	3
7045	2	1	1	4	0	2	1	2	0	1	1	2	1	1	4	0	2	1	2	0	1	1	2	4	5	2	97	97	1	1	1	2	5	5	5	4	2	6	5	-8	3	2	3	1
7046	2	1	1	4	0	2	1	2	0	1	1	2	1	1	4	0	2	1	2	0	1	1	2	3	4	2	1	1	2	1	4	2	4	4	4	1	5	5	4	6	6	2	3	3
7047	2	1	1	4	0	2	1	2	0	1	1	2	1	1	4	0	2	1	2	0	1	1	1	4	5	4	2	2	5	1	1	1	5	5	5	-8	5	3	6	1	2	2	3	5
7048	2	1	1	4	0	2	1	2	0	1	1	2	1	1	4	0	2	1	2	0	1	1	2	2	3	2	1	1	2	1	1	3	4	4	4	2	3	4	3	4	2	2	3	2
7049	2	1	1	4	0	2	1	2	0	1	1	2	1	1	4	0	2	1	2	0	1	1	3	4	3	2	1	1	1	1	1	4	3	3	3	3	3	2	1	3	1	2	3	2
7050	2	1	1	4	0	2	1	2	0	1	1	2	1	1	4	0	2	1	2	0	1	1	2	2	3	3	3	0	1	1	1	2	4	4	2	2	4	4	3	5	2	1	3	2
7051	2	1	1	4	0	2	1	2	0	1	1	2	1	1	4	0	2	1	2	0	1	1	1	1	2	2	1	1	1	3	-8	2	5	5	4	4	5	5	6	-8	-8	2	3	3
7052	2	1	1	4	0	2	1	2	0	1	1	2	1	1	4	0	2	1	2	0	1	1	3	4	1	2	1	1	1	1	-8	2	4	4	4	2	4	1	2	1	2	1	3	2
7053	2	1	1	4	0	2	1	2	0	1	1	2	1	1	4	0	2	1	2	0	1	1	4	3	4	2	1	1	2	2	2	4	3	3	2	1	4	5	4	5	3	1	2	2
7054	2	1	1	4	0	2	1	2	0	1	1	2	1	1	4	0	2	1	2	0	1	1	4	1	1	2	0	2	1	1	1	4	2	2	3	2	4	1	1	1	1	1	3	3
7055	2	1	1	4	0	2	1	2	0	1	1	2	1	1	4	0	2	1	2	0	1	1	3	1	5	2	97	97	5	-8	3	2	1	1	1	2	5	3	3	3	2	1	3	1
7056	2	1	1	4	0	2	1	2	0	1	1	2	1	1	4	0	2	1	2	0	1	1	2	4	4	4	2	1	2	1	1	2	4	4	4	3	4	6	3	-8	3	2	3	4
7057	2	1	1	4	0	2	1	2	0	1	1	2	1	1	4	0	2	1	2	0	1	1	4	4	4	-2	-2	-2	-8	-8	-8	3	2	4	2	1	2	5	5	-8	5	2	1	5
7058	2	1	1	4	0	2	1	2	0	1	1	2	1	1	4	0	2	1	2	0	1	1	3	2	4	2	1	1	3	2	1	1	4	2	4	2	2	4	5	7	7	1	1	4
7059	2	1	1	4	0	2	1	2	0	1	1	2	1	1	4	0	2	1	2	0	1	1	2	3	4	2	1	1	1	1	1	2	4	4	3	3	3	4	3	4	1	2	3	4
7060	2	1	1	4	0	2	1	2	0	1	1	2	1	1	4	0	2	1	2	0	1	1	2	4	4	1	0	1	2	1	1	2	2	2	2	2	4	5	3	5	3	3	3	2
7061	2	1	1	4	0	2	1	2	0	1	1	2	1	1	4	0	2	1	2	0	1	1	2	4	4	2	1	1	2	1	2	4	2	2	2	2	4	3	3	3	3	1	1	2
7062	2	1	1	4	0	2	1	2	0	1	1	2	1	1	4	0	2	1	2	0	1	1	4	2	3	2	97	97	2	1	3	1	5	4	-8	1	4	4	7	4	7	1	1	2
7063	2	1	1	4	0	2	1	2	0	1	1	2	1	1	4	0	2	1	2	0	1	1	4	4	3	4	2	2	1	1	1	2	5	5	2	2	3	5	4	4	1	1	2	2
7064	2	1	1	4	0	2	1	2	0	1	1	2	1	1	4	0	2	1	2	0	1	1	2	2	4	2	1	1	2	1	2	4	2	2	3	2	4	5	4	5	3	1	3	2
7065	2	1	1	4	0	2	1	2	0	1	1	2	1	1	4	0	2	1	2	0	1	1	2	4	4	4	1	3	1	1	1	2	4	3	3	3	2	5	4	6	3	1	3	4
7066	2	1	1	4	0	2	1	2	0	1	1	2	1	1	4	0	2	1	2	0	1	1	4	2	4	2	1	1	2	2	2	2	4	2	4	2	4	5	4	6	2	1	2	2
7067	2	1	1	4	0	2	1	2	0	1	1	2	1	1	4	0	2	1	2	0	1	1	4	2	2	2	97	97	2	1	2	2	2	2	2	2	4	1	1	-8	1	1	2	2
7068	2	1	1	4	0	2	1	2	0	1	1	2	1	1	4	0	2	1	2	0	1	1	2	4	5	2	1	1	2	3	3	2	4	2	2	2	4	5	3	5	1	2	3	1
7069	2	1	1	4	0	2	1	2	0	1	1	2	1	1	4	0	2	1	2	0	1	1	2	4	4	2	1	1	1	1	1	2	2	2	1	2	4	6	4	7	2	2	3	4
7070	2	1	1	4	0	2	1	2	0	1	1	2	1	1	4	0	2	1	2	0	1	1	2	2	5	2	97	97	1	1	1	2	2	2	2	2	3	3	2	-8	1	1	3	4
7071	2	1	1	4	0	2	1	2	0	1	1	2	1	1	4	0	2	1	2	0	1	1	3	4	4	2	1	1	1	1	1	3	4	4	3	2	4	3	3	3	2	1	3	3
7072	2	1	1	4	0	2	1	2	0	1	1	2	1	1	4	0	2	1	2	0	1	1	2	3	3	2	1	1	3	1	3	2	4	4	2	2	4	2	3	2	1	2	3	3
7073	2	1	1	4	0	2	1	2	0	1	1	2	1	1	4	0	2	1	2	0	1	1	4	3	5	97	97	97	2	1	1	2	4	4	3	2	4	5	5	5	3	1	3	2
7074	2	1	1	4	0	2	1	2	0	1	1	2	1	1	4	0	2	1	2	0	1	1	3	4	4	2	1	1	1	1	1	2	5	5	2	2	5	5	4	6	1	1	3	4
7075	2	1	1	4	0	2	1	2	0	1	1	2	1	1	4	0	2	1	2	0	1	1	2	4	4	3	2	1	2	2	-8	2	5	2	2	2	4	5	4	6	2	1	3	4
7076	2	1	1	4	0	2	1	2	0	1	1	2	1	1	4	0	2	1	2	0	1	1	3	3	4	5	4	1	1	1	1	2	4	4	3	-8	4	5	3	4	2	2	3	3
7077	2	1	1	4	0	2	1	2	0	1	1	2	1	1	4	0	2	1	2	0	1	1	4	4	4	2	1	1	3	2	2	4	4	4	3	2	4	6	5	7	4	2	3	3
7078	2	1	1	4	0	2	1	2	0	1	1	2	1	1	4	0	2	1	2	0	1	1	5	3	3	2	1	1	3	1	3	4	2	4	4	2	2	5	4	7	2	2	3	4
7079	2	1	1	4	0	2	1	2	0	1	1	2	1	1	4	0	2	1	2	0	1	1	5	3	4	6	3	3	2	2	3	4	2	2	2	2	4	5	3	5	1	2	1	2
7080	2	1	1	4	0	2	1	2	0	1	1	2	1	1	4	0	2	1	2	0	1	1	4	3	4	2	1	1	4	1	3	2	4	4	2	2	2	1	1	1	-8	1	3	-8
7081	2	1	1	4	0	2	1	2	0	1	1	2	1	1	4	0	2	1	2	0	1	1	4	4	3	1	97	97	1	1	1	4	4	2	4	2	4	4	4	2	5	2	2	3
[truncated: 2,734 more rows]

## Sheet: total
id	gender	age	marital_status	educational_level	chronic_diseases	area_of_residence	average_monthly_income	self_perceived_health_status	smoking	alcohol_drinking	betel_nuts_chewing	VAR00001	VAR00002	VAR00003	VAR00004	VAR00005	VAR00006	VAR00007	VAR00008	VAR00009	VAR00010	VAR00011	VAR00012	VAR00013	VAR00014	VAR00015	VAR00016	VAR00017	VAR00018	VAR00019	VAR00020	VAR00021	VAR00022	VAR00023	VAR00024	VAR00025	VAR00026	VAR00027	VAR00028	VAR00029	VAR00030	VAR00031	VAR00032	VAR00033
1	1	1	1	1	0	4	0	5	3	3	3	1	1	1	1	0	4	0	5	3	3	3	1	3	5	2	97	97	1	1	1	4	4	4	4	2	5	5	3	5	1	3	2	1
2	1	1	1	1	0	4	0	5	3	3	3	1	1	1	1	0	4	0	5	3	3	3	1	4	5	1	0	1	3	1	2	2	2	1	1	1	1	6	5	8	9	1	1	2
3	1	1	1	1	0	4	0	5	3	3	3	1	1	1	1	0	4	0	5	3	3	3	4	3	3	2	1	1	2	1	1	1	4	2	4	2	4	5	5	6	3	-8	2	2
4	1	1	1	1	0	4	0	5	3	3	3	1	1	1	1	0	4	0	5	3	3	3	4	4	4	2	1	1	1	1	1	4	4	4	-8	2	4	5	5	5	5	1	2	1
5	1	1	1	1	0	4	0	5	3	3	3	1	1	1	1	0	4	0	5	3	3	3	4	4	4	1	0	1	1	1	1	2	4	4	4	4	5	1	1	1	1	1	3	2
6	1	1	1	1	0	4	0	5	3	3	3	1	1	1	1	0	4	0	5	3	3	3	2	3	4	6	3	3	1	1	1	4	4	4	2	2	1	3	2	4	2	2	2	1
7	1	1	1	1	0	4	0	5	3	3	3	1	1	1	1	0	4	0	5	3	3	3	2	5	5	2	1	1	1	1	1	4	1	1	2	1	5	5	3	8	1	2	1	2
8	1	1	1	1	0	4	0	5	3	3	3	1	1	1	1	0	4	0	5	3	3	3	3	4	4	4	3	1	1	1	1	2	5	5	5	3	1	10	10	10	3	2	3	1
9	2	1	1	1	1	4	0	5	3	2	3	2	1	1	1	1	4	0	5	3	2	3	2	4	4	2	1	1	1	1	3	2	5	4	1	2	5	5	5	8	3	2	3	2
10	2	1	1	1	1	4	0	5	3	2	3	2	1	1	1	1	4	0	5	3	2	3	4	4	4	2	1	1	2	1	1	4	4	4	5	2	4	4	7	3	3	1	1	2
11	2	1	1	1	1	4	0	5	3	2	3	2	1	1	1	1	4	0	5	3	2	3	1	4	4	2	1	1	1	1	1	2	4	4	2	4	4	4	2	7	1	2	3	4
12	2	1	1	1	1	4	0	5	3	2	3	2	1	1	1	1	4	0	5	3	2	3	4	3	4	2	1	1	1	1	1	4	1	2	2	1	2	4	4	4	1	2	2	1
13	2	1	1	1	1	4	0	5	3	2	3	2	1	1	1	1	4	0	5	3	2	3	3	1	5	2	2	0	3	1	1	2	4	1	1	4	1	4	3	4	1	1	1	2
14	2	1	1	1	1	4	0	5	3	2	3	2	1	1	1	1	4	0	5	3	2	3	4	4	5	2	1	1	1	1	2	4	4	4	4	2	3	5	5	4	3	2	3	3
15	2	1	1	1	1	4	0	5	3	2	3	2	1	1	1	1	4	0	5	3	2	3	1	4	5	2	1	1	1	1	1	2	1	1	4	1	5	5	3	5	3	2	2	-8
16	2	1	1	1	1	4	0	5	3	2	3	2	1	1	1	1	4	0	5	3	2	3	2	4	5	2	1	1	4	1	1	2	2	4	1	4	3	5	1	6	4	2	3	1
17	2	1	1	1	1	4	0	5	3	2	3	2	1	1	1	1	4	0	5	3	2	3	5	2	4	1	0	1	3	3	3	3	2	3	3	2	4	7	1	7	2	3	3	5
18	1	1	1	1	0	4	0	5	3	3	3	1	1	1	1	0	4	0	5	3	3	3	2	4	4	2	1	1	3	1	3	4	3	2	3	1	5	3	3	5	3	3	3	2
19	1	1	1	1	0	4	0	5	3	3	3	1	1	1	1	0	4	0	5	3	3	3	3	4	4	2	1	1	1	1	1	1	4	4	4	1	5	1	1	1	1	2	2	3
20	1	1	1	1	0	4	0	5	3	3	3	1	1	1	1	0	4	0	5	3	3	3	2	4	5	2	1	1	5	3	3	4	3	2	4	1	3	6	4	8	7	2	3	2
21	1	1	1	1	0	4	0	5	3	3	3	1	1	1	1	0	4	0	5	3	3	3	2	2	3	1	0	1	4	1	1	4	2	2	2	2	4	5	1	6	5	1	3	4
22	1	1	1	1	0	4	0	5	3	3	3	1	1	1	1	0	4	0	5	3	3	3	4	4	4	1	1	0	3	3	1	4	2	1	1	2	2	3	3	4	4	2	1	1
23	1	1	1	1	0	4	0	5	3	3	3	1	1	1	1	0	4	0	5	3	3	3	4	4	5	1	0	1	1	1	3	4	3	2	3	1	5	5	5	5	5	1	3	4
24	1	1	1	1	0	4	0	5	3	3	3	1	1	1	1	0	4	0	5	3	3	3	4	5	4	2	1	1	1	1	1	2	2	4	1	1	4	3	1	5	3	3	3	3
25	1	1	1	1	0	4	0	5	3	3	3	1	1	1	1	0	4	0	5	3	3	3	2	4	5	2	1	1	3	1	1	-8	2	2	4	2	4	6	4	8	5	2	3	4
26	1	1	1	1	0	4	0	5	3	3	3	1	1	1	1	0	4	0	5	3	3	3	4	3	4	2	1	1	3	1	3	3	4	4	2	2	4	5	1	5	5	2	3	3
27	1	1	1	1	0	4	0	5	3	3	3	1	1	1	1	0	4	0	5	3	3	3	4	4	5	1	97	97	1	1	1	2	4	1	2	2	5	5	3	6	2	1	1	1
28	1	1	1	1	0	4	0	5	3	3	3	1	1	1	1	0	4	0	5	3	3	3	3	4	4	1	97	97	1	1	1	2	4	4	4	4	4	6	6	6	6	1	1	3
29	2	1	1	1	1	4	0	5	3	2	3	2	1	1	1	1	4	0	5	3	2	3	4	4	4	1	97	97	2	1	1	4	5	1	4	2	4	3	3	4	5	1	3	2
30	2	1	1	1	1	4	0	5	3	2	3	2	1	1	1	1	4	0	5	3	2	3	4	3	3	1	97	97	2	2	2	4	3	3	2	3	3	5	5	5	5	1	3	2
31	2	1	1	1	1	4	0	5	3	2	3	2	1	1	1	1	4	0	5	3	2	3	4	3	4	1	0	1	3	1	1	4	2	1	2	5	5	4	4	5	5	-8	1	3
32	2	1	1	1	1	4	0	5	3	2	3	2	1	1	1	1	4	0	5	3	2	3	4	3	4	2	1	1	4	1	1	4	4	4	5	1	1	3	4	2	4	1	2	4
33	2	1	1	1	1	4	0	5	3	2	3	2	1	1	1	1	4	0	5	3	2	3	4	4	4	1	0	1	1	1	1	4	1	1	1	1	5	3	2	4	1	1	1	1
34	2	1	1	1	1	4	0	5	3	2	3	2	1	1	1	1	4	0	5	3	2	3	2	2	2	2	0	2	2	2	2	4	4	4	4	1	4	4	3	6	1	1	2	2
35	2	1	1	1	1	4	0	5	3	2	3	2	1	1	1	1	4	0	5	3	2	3	4	3	4	2	1	1	4	2	3	4	4	5	2	2	3	5	3	6	3	2	3	2
36	2	1	1	1	1	4	0	5	3	2	3	2	1	1	1	1	4	0	5	3	2	3	1	4	2	2	1	1	4	1	1	2	4	4	4	1	-8	2	1	4	2	1	3	4
37	2	1	1	1	1	4	0	5	3	2	3	2	1	1	1	1	4	0	5	3	2	3	2	2	4	2	1	1	2	1	3	3	4	1	4	1	5	5	5	7	5	1	1	5
38	2	1	1	1	1	4	0	5	3	2	3	2	1	1	1	1	4	0	5	3	2	3	4	4	5	2	0	2	4	1	1	2	2	2	4	2	5	5	5	5	5	1	2	2
39	2	1	1	1	1	4	0	5	3	2	3	2	1	1	1	1	4	0	5	3	2	3	2	4	5	1	97	97	1	1	1	2	2	2	5	2	5	6	4	7	5	1	2	2
40	2	1	1	1	1	4	0	5	3	2	3	2	1	1	1	1	4	0	5	3	2	3	3	3	5	1	0	1	3	4	2	2	5	5	5	1	4	3	3	4	3	2	3	5
41	2	1	1	1	1	4	0	5	3	2	3	2	1	1	1	1	4	0	5	3	2	3	4	4	4	2	0	2	1	1	1	4	2	4	1	1	5	4	4	4	7	1	2	2
42	1	4	1	2	1	3	1	3	0	0	0	1	4	1	2	1	3	1	3	0	0	0	3	4	2	1	1	0	2	2	1	1	2	1	2	2	4	1	1	1	1	3	2	2
43	1	4	1	2	1	3	1	3	0	0	0	1	4	1	2	1	3	1	3	0	0	0	5	2	1	96	96	96	2	1	1	4	3	3	3	3	5	1	1	1	1	1	3	5
44	1	4	1	2	1	3	1	3	0	0	0	1	4	1	2	1	3	1	3	0	0	0	2	4	4	1	0	1	1	1	1	2	4	4	4	2	1	1	1	1	1	1	3	2
45	1	4	1	2	1	3	1	3	0	0	0	1	4	1	2	1	3	1	3	0	0	0	3	1	4	1	97	97	1	1	1	2	1	3	5	1	5	1	1	1	1	2	1	1
46	1	4	1	2	1	3	1	3	0	0	0	1	4	1	2	1	3	1	3	0	0	0	2	2	4	2	1	1	3	1	3	4	2	1	2	1	4	6	4	7	4	2	3	4
47	2	4	1	3	1	1	3	3	0	1	3	2	4	1	3	1	1	3	3	0	1	3	1	3	4	2	1	1	1	-8	1	2	4	4	4	2	4	4	2	6	5	3	3	4
48	2	4	1	3	1	1	3	3	0	1	3	2	4	1	3	1	1	3	3	0	1	3	2	2	4	2	1	1	4	2	1	2	1	4	2	1	2	2	2	3	2	3	3	2
49	2	4	1	3	1	1	3	3	0	1	3	2	4	1	3	1	1	3	3	0	1	3	2	3	4	2	1	1	1	1	1	2	4	4	4	2	4	5	7	5	9	1	1	2
50	2	4	1	3	1	1	3	3	0	1	3	2	4	1	3	1	1	3	3	0	1	3	4	4	4	8	3	5	1	1	1	2	5	5	5	-8	1	5	3	-8	1	1	3	1
51	2	4	1	3	1	1	6	3	0	1	3	2	4	1	3	1	1	6	3	0	1	3	4	2	4	2	1	1	1	1	1	1	1	2	2	2	4	4	3	5	1	1	2	1
52	1	4	1	2	1	3	1	3	0	0	0	1	4	1	2	1	3	1	3	0	0	0	4	4	5	2	1	1	4	1	2	4	5	5	5	1	5	5	3	8	4	-8	3	5
53	1	4	1	2	1	3	1	3	0	0	0	1	4	1	2	1	3	1	3	0	0	0	4	4	4	1	1	0	2	2	2	4	2	4	4	2	2	3	1	3	1	3	3	2
54	1	4	1	2	1	3	1	3	0	0	0	1	4	1	2	1	3	1	3	0	0	0	2	4	5	3	2	1	1	1	1	4	1	1	1	1	5	5	4	6	5	1	2	2
55	1	4	1	2	1	3	1	3	0	0	0	1	4	1	2	1	3	1	3	0	0	0	4	4	4	2	97	97	1	1	1	3	2	2	2	1	2	5	2	5	1	1	1	1
56	1	4	1	2	1	3	1	3	0	0	0	1	4	1	2	1	3	1	3	0	0	0	4	3	3	2	1	1	1	1	1	4	4	4	1	2	3	4	4	4	2	2	2	2
57	2	4	1	3	1	1	3	3	0	1	3	2	4	1	3	1	1	3	3	0	1	3	4	2	3	2	1	1	3	1	3	4	4	3	4	1	5	2	2	2	2	2	3	4
58	2	4	1	3	1	1	3	3	0	1	3	2	4	1	3	1	1	3	3	0	1	3	1	1	4	1	0	1	1	1	1	2	2	4	4	1	5	1	1	1	1	1	2	1
59	2	4	1	3	1	1	3	3	0	1	3	2	4	1	3	1	1	3	3	0	1	3	2	3	4	1	97	97	3	1	3	4	3	2	4	2	4	5	5	5	5	2	1	3
60	2	4	1	3	1	1	3	3	0	1	3	2	4	1	3	1	1	3	3	0	1	3	2	3	3	1	97	97	1	2	1	4	2	2	4	3	4	4	3	6	4	2	1	2
61	2	4	1	3	1	1	3	3	0	1	3	2	4	1	3	1	1	3	3	0	1	3	3	2	4	2	1	1	2	1	2	2	4	3	2	1	4	4	5	6	3	2	3	2
62	1	4	1	2	1	3	1	3	0	0	0	1	4	1	2	1	3	1	3	0	0	0	5	1	3	1	97	97	1	1	1	1	1	1	3	1	5	4	4	4	2	2	2	3
63	1	4	1	2	1	3	1	3	0	0	0	1	4	1	2	1	3	1	3	0	0	0	2	4	4	2	1	1	1	1	1	1	4	4	4	1	5	5	3	7	1	1	2	2
64	1	4	1	2	1	3	1	3	0	0	0	1	4	1	2	1	3	1	3	0	0	0	2	4	5	-2	-2	-2	3	1	1	2	4	3	3	3	3	5	2	5	2	1	3	5
65	1	4	1	2	1	3	1	3	0	0	0	1	4	1	2	1	3	1	3	0	0	0	3	4	4	1	1	0	3	1	3	2	2	2	1	1	4	4	3	8	6	1	3	3
66	1	4	1	2	1	3	1	3	0	0	0	1	4	1	2	1	3	1	3	0	0	0	2	3	4	1	0	1	4	1	4	2	1	1	1	1	5	4	1	7	1	1	3	2
67	2	4	1	3	1	1	3	3	0	1	3	2	4	1	3	1	1	3	3	0	1	3	2	2	4	2	1	1	2	1	1	4	5	5	4	2	2	1	1	1	1	1	2	2
68	2	4	1	3	1	1	3	3	0	1	3	2	4	1	3	1	1	3	3	0	1	3	3	4	4	2	1	1	3	3	3	2	4	2	3	2	3	6	6	6	5	2	3	4
69	2	4	1	3	1	1	3	3	0	1	3	2	4	1	3	1	1	3	3	0	1	3	4	3	4	2	1	1	3	1	3	4	2	2	2	1	4	6	4	7	5	2	3	2
70	2	4	1	3	1	1	3	3	0	1	3	2	4	1	3	1	1	3	3	0	1	3	4	4	4	2	1	1	4	1	3	2	4	1	1	1	1	3	2	5	1	1	3	1
71	2	4	1	3	1	1	3	3	0	1	3	2	4	1	3	1	1	3	3	0	1	3	4	4	4	2	1	1	1	1	3	2	2	3	2	2	4	5	5	5	4	2	3	2
72	1	4	1	2	1	3	2	3	0	0	0	1	4	1	2	1	3	2	3	0	0	0	3	3	4	0	0	0	3	1	3	2	3	3	4	1	5	4	1	5	1	2	3	5
73	1	4	1	2	1	3	1	3	0	0	0	1	4	1	2	1	3	1	3	0	0	0	4	2	3	2	1	1	5	1	1	2	4	2	4	2	5	3	6	6	3	2	3	4
74	1	4	1	2	1	3	1	3	0	0	0	1	4	1	2	1	3	1	3	0	0	0	2	4	4	2	1	1	4	1	1	3	3	1	1	1	5	5	5	5	4	1	3	1
75	1	4	1	2	1	3	1	3	0	0	0	1	4	1	2	1	3	1	3	0	0	0	4	3	4	2	1	1	1	1	5	2	1	1	1	1	5	3	1	8	1	2	3	2
76	1	4	1	2	1	3	1	3	0	0	0	1	4	1	2	1	3	1	3	0	0	0	3	3	4	1	97	97	3	1	3	4	3	3	3	1	3	5	5	6	5	1	1	3
77	2	4	1	3	1	1	3	3	0	1	3	2	4	1	3	1	1	3	3	0	1	3	4	3	4	2	1	1	2	3	2	3	2	2	4	2	3	5	4	5	6	2	1	3
78	2	4	1	3	1	1	3	3	0	1	3	2	4	1	3	1	1	3	3	0	1	3	2	3	4	3	1	2	1	1	1	-8	3	3	4	3	4	5	3	5	2	2	3	5
79	2	4	1	3	1	1	3	3	0	1	3	2	4	1	3	1	1	3	3	0	1	3	2	4	5	2	97	97	4	1	4	4	3	2	4	1	2	3	3	5	6	2	3	4
80	2	4	1	3	1	1	3	3	0	1	3	2	4	1	3	1	1	3	3	0	1	3	4	2	2	2	1	1	1	1	1	2	4	4	4	2	2	1	1	5	1	2	3	2
81	2	4	1	3	1	1	3	3	0	1	3	2	4	1	3	1	1	3	3	0	1	3	3	3	4	2	1	1	1	1	1	4	2	2	2	-8	4	3	2	6	1	1	3	5
82	2	4	1	3	1	1	3	3	0	1	3	2	4	1	3	1	1	3	3	0	1	3	4	4	5	2	97	97	4	1	1	2	2	3	3	-8	2	4	5	4	2	2	3	3
83	1	4	1	2	1	3	2	3	0	0	0	1	4	1	2	1	3	2	3	0	0	0	4	4	4	2	1	1	2	1	1	4	4	4	3	3	4	6	5	6	4	1	2	2
84	1	4	1	2	1	3	2	3	0	0	0	1	4	1	2	1	3	2	3	0	0	0	2	4	4	2	1	1	3	1	1	4	2	2	2	1	5	3	3	5	3	3	3	4
85	1	4	1	2	1	3	2	3	0	0	0	1	4	1	2	1	3	2	3	0	0	0	2	2	4	1	1	0	1	1	1	3	5	4	4	4	4	6	6	6	5	2	2	4
86	1	4	1	2	1	3	2	3	0	0	0	1	4	1	2	1	3	2	3	0	0	0	4	4	4	0	0	0	1	1	1	2	4	2	2	1	4	2	1	7	5	2	3	2
87	1	4	1	2	1	3	2	3	0	0	0	1	4	1	2	1	3	2	3	0	0	0	2	4	4	2	1	1	1	1	1	4	3	4	4	2	4	4	4	5	6	1	3	4
88	1	4	1	2	1	3	2	3	0	0	0	1	4	1	2	1	3	2	3	0	0	0	4	4	4	2	97	97	1	1	1	1	2	2	4	2	4	5	6	5	2	2	3	1
89	2	4	1	3	1	1	3	3	0	1	3	2	4	1	3	1	1	3	3	0	1	3	2	4	5	2	1	1	5	2	3	4	4	4	3	2	4	6	1	10	4	2	3	2
90	2	4	1	3	1	1	3	3	0	1	3	2	4	1	3	1	1	3	3	0	1	3	4	3	5	1	1	0	3	1	3	4	4	4	4	1	4	5	3	8	3	2	1	3
91	2	4	1	3	1	1	3	3	0	1	3	2	4	1	3	1	1	3	3	0	1	3	3	4	5	2	1	1	5	3	5	1	2	2	2	1	5	1	1	1	1	2	2	5
92	2	4	1	3	1	1	3	3	0	1	3	2	4	1	3	1	1	3	3	0	1	3	4	4	3	2	1	1	3	1	1	2	2	2	3	2	3	3	3	6	3	2	3	2
93	1	4	1	2	1	3	2	3	0	0	0	1	4	1	2	1	3	2	3	0	0	0	5	4	4	2	1	1	2	1	1	4	2	1	4	1	5	5	4	6	2	1	1	4
94	1	4	1	2	1	3	2	3	0	0	0	1	4	1	2	1	3	2	3	0	0	0	4	4	5	2	1	1	3	1	3	2	3	3	3	3	3	4	4	4	4	2	3	5
95	1	4	1	2	1	3	2	3	0	0	0	1	4	1	2	1	3	2	3	0	0	0	4	3	4	2	1	1	3	1	1	1	2	3	4	3	5	5	4	8	6	2	3	5
96	2	4	1	3	1	1	3	3	0	1	3	2	4	1	3	1	1	3	3	0	1	3	3	4	4	2	0	2	1	1	1	4	2	2	3	4	4	5	5	3	3	2	2	2
97	2	4	1	3	1	1	3	3	0	1	3	2	4	1	3	1	1	3	3	0	1	3	4	4	5	2	1	1	3	1	1	4	4	2	2	1	4	6	5	5	5	3	1	2
98	2	4	1	3	1	1	3	3	0	1	3	2	4	1	3	1	1	3	3	0	1	3	4	4	3	0	0	0	1	1	1	2	2	2	3	2	2	3	7	2	2	3	1	4
99	2	4	1	3	1	1	3	3	0	1	3	2	4	1	3	1	1	3	3	0	1	3	4	3	4	2	1	1	3	1	1	1	2	1	1	1	4	3	3	3	8	2	2	4
100	1	1	1	1	0	4	0	5	3	3	3	1	1	1	1	0	4	0	5	3	3	3	3	3	4	2	1	1	4	1	3	4	1	1	1	1	5	7	7	8	6	2	3	1
101	1	1	1	1	0	4	0	5	3	3	3	1	1	1	1	0	4	0	5	3	3	3	4	4	4	2	1	1	1	1	1	4	5	4	4	1	5	3	2	6	2	1	3	4
102	1	1	1	1	0	4	0	5	3	3	3	1	1	1	1	0	4	0	5	3	3	3	2	3	5	3	2	1	2	1	3	4	2	2	1	1	4	6	4	8	8	2	3	3
103	1	1	1	1	0	4	0	5	3	3	3	1	1	1	1	0	4	0	5	3	3	3	4	4	5	2	1	1	5	2	1	2	1	4	4	1	4	5	5	5	5	2	3	5
104	1	1	1	1	0	4	0	5	3	3	3	1	1	1	1	0	4	0	5	3	3	3	2	4	4	0	0	0	4	4	4	4	1	2	1	1	5	5	5	5	7	1	1	4
105	1	1	1	1	0	4	0	5	3	3	3	1	1	1	1	0	4	0	5	3	3	3	2	-8	4	4	0	4	3	1	1	2	4	4	3	2	4	4	1	4	1	1	3	4
106	1	1	1	1	0	4	0	5	3	3	3	1	1	1	1	0	4	0	5	3	3	3	2	2	5	2	1	1	2	1	1	4	1	2	2	1	2	7	4	7	4	2	3	5
107	1	1	1	1	0	4	0	5	3	3	3	1	1	1	1	0	4	0	5	3	3	3	4	2	4	2	1	1	1	1	1	4	3	2	2	3	4	4	3	5	2	1	2	2
108	1	1	1	1	0	4	0	5	3	3	3	1	1	1	1	0	4	0	5	3	3	3	3	2	4	1	1	0	1	1	1	3	4	3	4	3	3	5	5	5	5	1	3	3
109	1	1	1	1	0	4	0	5	3	3	3	1	1	1	1	0	4	0	5	3	3	3	4	2	4	2	1	1	1	1	3	4	3	1	2	1	3	8	8	8	1	1	2	5
110	1	1	1	1	0	4	0	5	3	3	3	1	1	1	1	0	4	0	5	3	3	3	4	3	3	2	1	1	2	1	1	4	5	4	2	1	5	1	1	5	3	2	3	3
111	1	1	1	1	0	4	0	5	3	3	3	1	1	1	1	0	4	0	5	3	3	3	1	4	5	3	3	0	1	1	3	4	2	2	1	1	3	7	8	7	5	1	2	4
112	1	1	1	1	0	4	0	5	3	3	3	1	1	1	1	0	4	0	5	3	3	3	4	2	3	1	97	97	-8	1	1	1	2	4	4	1	5	1	1	1	1	2	2	2
113	1	1	1	1	0	4	0	5	3	3	3	1	1	1	1	0	4	0	5	3	3	3	2	2	4	2	1	1	4	1	1	4	2	1	2	1	1	5	5	6	1	1	2	4
114	1	1	1	1	0	4	0	5	3	3	3	1	1	1	1	0	4	0	5	3	3	3	3	2	4	3	1	2	2	1	1	4	4	4	4	2	2	6	6	8	6	2	3	3
115	1	1	1	1	0	4	0	5	3	3	3	1	1	1	1	0	4	0	5	3	3	3	4	4	4	1	0	1	3	3	1	1	4	3	3	2	2	1	7	5	6	2	3	2
116	1	1	1	2	0	4	0	5	3	3	3	1	1	1	2	0	4	0	5	3	3	3	1	2	3	2	1	1	2	1	1	2	4	4	-8	2	4	3	1	3	1	2	3	4
117	1	1	1	2	0	4	0	5	3	3	3	1	1	1	2	0	4	0	5	3	3	3	2	3	4	2	1	1	3	1	1	2	2	2	5	2	5	4	2	7	2	2	2	1
118	1	1	1	2	0	4	0	5	3	3	3	1	1	1	2	0	4	0	5	3	3	3	1	5	5	3	1	2	1	1	1	2	5	5	2	-8	5	6	5	8	4	2	3	2
119	1	1	1	2	0	4	0	5	3	3	3	1	1	1	2	0	4	0	5	3	3	3	1	4	4	2	0	2	4	1	1	4	2	2	2	1	4	6	4	8	5	1	3	2
120	1	1	1	2	0	4	0	5	3	3	3	1	1	1	2	0	4	0	5	3	3	3	4	4	3	3	97	97	3	1	4	2	4	1	4	1	2	4	1	-8	3	2	3	2
121	1	1	1	2	0	4	0	5	3	3	3	1	1	1	2	0	4	0	5	3	3	3	3	2	4	3	2	1	5	3	2	4	5	4	4	4	4	6	5	7	5	3	2	5
122	1	1	1	2	0	4	0	5	3	3	3	1	1	1	2	0	4	0	5	3	3	3	4	2	3	2	1	1	3	1	1	4	3	4	4	1	5	3	2	5	3	2	1	4
123	1	1	1	2	0	4	0	5	3	3	3	1	1	1	2	0	4	0	5	3	3	3	2	3	5	4	2	2	5	1	1	4	3	4	5	3	4	4	1	5	5	2	3	3
124	1	1	1	2	0	4	0	5	3	3	3	1	1	1	2	0	4	0	5	3	3	3	4	4	5	2	1	1	1	1	1	4	5	3	4	5	5	5	5	6	1	1	3	1
125	1	1	1	2	0	4	0	5	3	3	3	1	1	1	2	0	4	0	5	3	3	3	4	4	5	1	1	0	3	1	1	2	4	4	4	2	5	5	3	6	2	1	3	4
126	1	1	1	2	0	4	0	5	3	3	3	1	1	1	2	0	4	0	5	3	3	3	4	4	5	2	1	1	2	3	1	1	3	4	2	2	3	7	5	7	2	3	1	4
127	1	1	1	2	0	4	0	5	3	3	3	1	1	1	2	0	4	0	5	3	3	3	4	4	4	2	1	1	4	3	2	2	3	2	2	4	3	4	1	7	3	2	3	3
128	1	1	1	2	0	4	0	5	3	3	3	1	1	1	2	0	4	0	5	3	3	3	3	2	5	3	97	97	1	1	1	1	4	2	4	2	4	3	3	7	3	1	2	2
129	1	1	1	2	0	4	0	5	3	3	3	1	1	1	2	0	4	0	5	3	3	3	2	3	3	2	1	1	2	1	1	4	5	5	5	5	5	1	1	1	1	2	3	5
130	1	1	1	2	0	4	0	5	3	3	3	1	1	1	2	0	4	0	5	3	3	3	3	3	5	4	97	97	4	1	1	2	5	2	2	1	2	5	1	6	5	1	3	1
131	1	1	1	2	0	4	0	5	3	3	3	1	1	1	2	0	4	0	5	3	3	3	2	2	3	2	97	97	3	1	1	2	4	4	5	2	5	6	-8	9	4	2	3	2
132	1	1	0	2	0	4	0	5	3	3	3	1	1	0	2	0	4	0	5	3	3	3	2	4	3	1	0	1	2	1	1	4	5	5	5	2	5	4	5	1	8	2	3	5
133	1	1	0	2	0	4	0	5	3	3	3	1	1	0	2	0	4	0	5	3	3	3	3	3	5	2	97	97	3	1	3	4	5	2	2	1	2	5	3	7	7	1	1	4
134	1	1	0	2	0	4	0	5	3	3	3	1	1	0	2	0	4	0	5	3	3	3	4	4	5	2	0	2	1	1	1	4	2	-8	4	1	-8	7	7	7	2	1	2	1
135	1	1	0	2	0	4	0	5	3	3	3	1	1	0	2	0	4	0	5	3	3	3	2	2	4	2	1	1	1	1	1	4	4	4	4	1	5	5	5	5	3	2	2	1
136	1	1	0	2	0	4	0	5	3	3	3	1	1	0	2	0	4	0	5	3	3	3	4	3	4	3	2	1	1	1	3	2	1	1	3	1	5	3	3	3	2	2	1	2
137	1	1	0	2	0	4	0	5	3	3	3	1	1	0	2	0	4	0	5	3	3	3	2	3	4	2	1	1	3	1	2	2	4	4	-8	2	4	4	3	5	3	1	3	2
138	1	1	0	2	0	4	0	5	3	3	3	1	1	0	2	0	4	0	5	3	3	3	4	2	4	2	97	97	3	1	3	4	2	1	2	1	5	5	2	7	3	2	1	4
139	1	1	0	2	0	4	0	5	3	3	3	1	1	0	2	0	4	0	5	3	3	3	3	4	4	2	97	97	2	2	4	4	4	2	4	1	5	5	3	7	1	1	1	4
140	1	1	0	2	0	4	0	5	3	3	3	1	1	0	2	0	4	0	5	3	3	3	5	2	3	3	2	1	4	3	3	2	5	3	3	2	3	1	1	1	1	1	2	5
141	1	1	0	2	0	4	0	5	3	3	3	1	1	0	2	0	4	0	5	3	3	3	4	3	4	1	1	0	1	1	1	4	4	4	4	4	5	6	6	-8	5	1	3	2
142	1	1	0	2	0	4	0	5	3	3	3	1	1	0	2	0	4	0	5	3	3	3	4	3	4	2	1	1	3	1	1	2	5	2	4	1	5	5	5	5	5	2	1	1
143	1	1	0	2	0	4	0	5	3	3	3	1	1	0	2	0	4	0	5	3	3	3	3	4	4	2	1	1	2	1	1	4	4	4	3	2	2	4	4	5	4	2	3	2
144	1	1	0	2	0	4	0	5	3	3	3	1	1	0	2	0	4	0	5	3	3	3	4	3	3	1	97	97	1	1	3	4	1	1	3	2	5	1	1	1	2	2	3	3
145	1	1	0	2	0	4	0	5	3	3	3	1	1	0	2	0	4	0	5	3	3	3	2	1	5	4	3	1	1	1	1	2	5	2	2	2	5	5	3	1	1	2	2	1
146	1	1	0	2	0	4	0	5	3	3	3	1	1	0	2	0	4	0	5	3	3	3	2	2	5	1	97	97	2	1	1	2	1	2	1	1	5	6	5	7	6	1	1	2
147	1	1	0	2	0	4	0	5	3	3	3	1	1	0	2	0	4	0	5	3	3	3	3	3	3	2	1	1	3	4	3	4	2	2	3	2	5	5	5	9	5	2	3	3
148	1	1	0	2	0	4	0	5	3	3	3	1	1	0	2	0	4	0	5	3	3	3	5	2	4	2	1	1	2	1	1	2	5	3	1	3	5	6	6	8	2	3	3	4
149	1	1	0	2	0	4	0	5	3	3	3	1	1	0	2	0	4	0	5	3	3	3	3	2	4	1	1	0	5	1	1	2	1	1	4	1	3	3	2	8	4	-8	3	3
150	1	1	0	2	0	4	0	5	3	3	3	1	1	0	2	0	4	0	5	3	3	3	2	4	4	2	1	1	1	1	1	4	4	2	3	2	4	8	7	8	7	2	3	4
151	1	1	0	2	0	4	0	5	3	3	3	1	1	0	2	0	4	0	5	3	3	3	4	1	5	3	2	1	3	1	1	2	4	4	3	2	3	7	3	8	2	2	3	3
152	1	1	0	2	0	4	0	5	3	3	3	1	1	0	2	0	4	0	5	3	3	3	2	4	4	3	2	1	5	3	3	3	2	1	1	3	4	8	7	8	6	3	3	5
153	1	1	0	2	0	4	0	5	3	3	3	1	1	0	2	0	4	0	5	3	3	3	3	2	5	6	3	3	1	1	3	4	1	1	1	1	3	10	10	10	5	2	3	4
154	1	1	0	2	0	4	0	5	3	3	3	1	1	0	2	0	4	0	5	3	3	3	4	4	4	2	97	97	4	1	1	1	4	2	4	1	5	4	1	5	1	1	3	1
155	1	1	0	2	0	4	0	5	3	3	3	1	1	0	2	0	4	0	5	3	3	3	4	2	4	2	1	1	1	1	1	4	4	3	3	4	5	4	3	5	5	2	2	4
156	1	1	0	2	0	4	0	5	3	3	3	1	1	0	2	0	4	0	5	3	3	3	4	2	3	2	1	1	1	1	3	4	4	2	4	2	5	4	4	4	4	1	2	4
157	1	1	0	2	0	4	0	5	3	3	3	1	1	0	2	0	4	0	5	3	3	3	2	2	4	2	1	1	2	1	1	4	4	4	4	2	2	2	3	1	3	3	2	4
158	1	1	0	2	0	4	0	5	3	2	2	1	1	0	2	0	4	0	5	3	2	2	2	3	4	2	1	1	3	2	1	2	3	2	3	3	4	4	3	6	5	2	3	4
159	1	1	0	2	0	4	0	5	3	2	2	1	1	0	2	0	4	0	5	3	2	2	3	4	4	2	97	97	1	2	2	3	2	3	1	2	3	6	6	6	2	1	3	2
160	1	1	0	2	0	4	0	5	3	2	2	1	1	0	2	0	4	0	5	3	2	2	2	3	4	2	1	1	4	1	1	4	2	2	2	2	4	6	4	7	3	2	1	2
161	1	1	0	2	0	4	0	5	3	2	2	1	1	0	2	0	4	0	5	3	2	2	2	4	4	2	1	1	1	1	1	3	5	2	5	3	2	5	5	5	1	2	2	3
162	1	1	0	2	0	4	0	5	3	2	2	1	1	0	2	0	4	0	5	3	2	2	5	1	5	2	1	1	1	1	1	4	4	1	2	1	5	1	1	1	1	1	2	2
163	1	1	0	2	0	4	0	5	3	2	2	1	1	0	2	0	4	0	5	3	2	2	5	1	4	2	97	97	3	1	3	1	1	1	5	1	5	1	1	1	5	1	2	5
164	1	1	0	2	0	4	0	5	3	2	2	1	1	0	2	0	4	0	5	3	2	2	3	3	4	2	1	1	3	1	3	4	4	2	4	4	4	5	5	4	4	1	1	1
165	1	1	0	2	0	4	0	5	3	2	2	1	1	0	2	0	4	0	5	3	2	2	2	4	5	2	1	1	3	1	1	2	4	2	1	2	4	7	5	8	5	2	3	4
166	1	1	0	2	0	4	0	5	3	2	2	1	1	0	2	0	4	0	5	3	2	2	3	4	5	3	1	2	1	1	1	4	4	2	1	1	4	7	5	7	3	2	3	1
167	1	1	0	2	0	4	0	5	3	2	2	1	1	0	2	0	4	0	5	3	2	2	3	3	4	2	1	1	4	1	3	2	4	3	1	1	5	6	5	8	6	3	3	4
168	1	1	0	2	0	4	0	5	3	2	2	1	1	0	2	0	4	0	5	3	2	2	2	3	4	2	1	1	2	1	1	4	2	4	4	1	3	6	4	8	3	1	3	2
169	1	1	0	2	0	4	0	5	3	2	2	1	1	0	2	0	4	0	5	3	2	2	2	2	5	1	0	1	5	1	3	4	2	4	2	4	5	4	4	7	5	2	3	4
170	1	1	0	2	0	4	0	5	3	2	2	1	1	0	2	0	4	0	5	3	2	2	2	3	4	2	1	1	1	1	2	2	4	4	4	2	3	5	4	5	1	2	3	2
171	1	1	0	2	0	4	0	5	3	2	2	1	1	0	2	0	4	0	5	3	2	2	3	3	4	2	1	1	3	1	1	4	2	4	2	4	4	6	6	6	6	1	1	4
172	1	1	0	3	0	4	0	4	3	2	2	1	1	0	3	0	4	0	4	3	2	2	2	4	5	6	6	0	2	1	1	4	5	5	5	4	3	5	7	3	7	2	3	2
173	1	1	0	3	0	4	0	4	3	2	2	1	1	0	3	0	4	0	4	3	2	2	2	1	5	3	2	1	4	1	1	2	5	5	2	1	1	7	3	10	3	2	3	2
174	1	1	0	3	0	4	0	4	3	2	2	1	1	0	3	0	4	0	4	3	2	2	1	4	5	2	97	97	2	1	1	4	1	2	1	1	5	5	2	7	3	1	1	1
175	1	1	0	3	0	4	0	4	3	2	2	1	1	0	3	0	4	0	4	3	2	2	3	2	3	2	1	1	3	1	3	2	3	3	3	2	4	3	3	4	3	3	3	4
176	1	1	0	3	0	4	0	4	3	2	2	1	1	0	3	0	4	0	4	3	2	2	4	2	4	1	0	1	3	1	1	4	4	3	4	2	4	3	1	5	5	3	3	3
177	1	1	0	3	0	4	0	4	3	2	2	1	1	0	3	0	4	0	4	3	2	2	4	3	3	2	1	1	3	1	1	1	4	1	2	1	5	1	2	5	1	2	3	3
178	1	1	0	3	0	4	0	4	3	2	2	1	1	0	3	0	4	0	4	3	2	2	4	3	5	2	1	1	3	1	1	2	2	2	3	1	4	5	5	7	4	2	1	4
179	1	1	0	3	0	4	0	4	3	2	2	1	1	0	3	0	4	0	4	3	2	2	2	4	5	2	1	1	3	2	4	4	2	2	2	1	5	7	7	9	6	-8	3	4
180	1	1	0	3	0	4	1	4	3	2	2	1	1	0	3	0	4	1	4	3	2	2	2	3	4	2	1	1	1	1	1	4	4	3	4	1	2	4	4	6	4	3	3	4
181	1	1	0	3	0	4	1	4	3	2	2	1	1	0	3	0	4	1	4	3	2	2	2	4	4	2	1	1	4	1	1	2	4	4	4	4	4	9	7	-8	5	1	2	2
182	1	1	0	3	0	4	1	4	3	2	2	1	1	0	3	0	4	1	4	3	2	2	4	2	3	2	1	1	3	1	2	2	4	2	4	2	4	3	1	4	2	1	1	2
183	1	1	0	3	0	4	1	4	3	2	2	1	1	0	3	0	4	1	4	3	2	2	4	1	2	2	1	1	2	2	1	1	1	1	5	1	4	1	2	3	1	3	3	-8
184	1	1	0	3	0	4	1	4	3	2	2	1	1	0	3	0	4	1	4	3	2	2	4	2	5	3	2	1	3	1	2	2	4	3	2	1	4	4	2	6	3	1	1	5
185	1	1	0	3	0	4	1	4	3	2	2	1	1	0	3	0	4	1	4	3	2	2	3	4	5	2	0	2	1	1	1	2	4	2	1	1	4	6	7	7	8	1	2	-8
186	1	1	0	3	0	4	1	4	3	2	2	1	1	0	3	0	4	1	4	3	2	2	2	3	4	3	0	3	5	1	4	4	2	2	2	1	5	4	2	6	5	2	3	5
187	1	1	0	3	0	4	1	4	3	2	2	1	1	0	3	0	4	1	4	3	2	2	3	3	3	2	1	1	3	2	3	4	1	1	1	1	5	5	1	7	4	2	3	3
188	1	1	0	3	0	4	1	4	3	2	2	1	1	0	3	0	4	1	4	3	2	2	2	3	4	2	1	1	2	2	1	4	3	3	3	2	4	5	4	6	2	2	1	4
189	1	1	0	3	0	4	1	4	3	2	2	1	1	0	3	0	4	1	4	3	2	2	1	2	4	2	2	0	1	1	1	3	5	5	5	5	5	5	4	5	4	1	3	3
190	1	1	0	3	0	4	1	4	3	2	2	1	1	0	3	0	4	1	4	3	2	2	2	2	3	2	1	1	5	1	3	4	1	1	1	1	4	3	3	6	5	2	3	4
191	1	1	0	3	0	4	1	4	3	2	2	1	1	0	3	0	4	1	4	3	2	2	2	2	3	1	1	0	1	1	1	1	1	4	3	2	4	5	5	5	3	1	1	1
192	1	1	0	3	0	4	1	4	3	2	2	1	1	0	3	0	4	1	4	3	2	2	5	1	4	3	2	1	5	5	5	1	1	1	5	1	1	1	1	2	1	1	3	5
193	1	1	0	3	0	4	1	4	3	2	2	1	1	0	3	0	4	1	4	3	2	2	4	2	4	5	2	3	5	1	3	2	1	1	3	2	3	6	8	8	8	3	3	5
194	1	1	0	3	0	4	1	4	3	2	2	1	1	0	3	0	4	1	4	3	2	2	2	4	4	1	0	1	2	2	2	2	5	5	5	2	5	4	3	-8	3	2	3	2
195	1	1	0	3	0	4	1	4	3	2	2	1	1	0	3	0	4	1	4	3	2	2	4	2	4	2	97	97	2	1	3	2	3	2	1	1	3	5	5	5	5	2	1	4
196	1	1	0	3	1	4	1	4	3	2	2	1	1	0	3	1	4	1	4	3	2	2	4	2	3	2	1	1	3	3	1	4	4	4	3	1	3	4	1	7	3	2	3	3
197	1	1	0	3	1	4	1	4	3	2	2	1	1	0	3	1	4	1	4	3	2	2	4	3	4	2	97	97	4	3	4	4	4	2	2	1	5	5	4	6	5	1	1	2
198	1	1	0	3	1	4	1	4	3	2	2	1	1	0	3	1	4	1	4	3	2	2	3	2	4	1	0	1	3	1	3	4	2	2	2	1	4	4	3	5	3	2	3	2
199	1	1	0	3	1	4	1	4	3	2	2	1	1	0	3	1	4	1	4	3	2	2	4	3	4	2	97	97	1	1	1	4	2	2	5	1	4	6	5	2	5	1	1	4
200	1	1	0	3	1	4	1	4	3	2	2	1	1	0	3	1	4	1	4	3	2	2	5	3	5	0	0	0	4	1	3	4	4	1	2	1	4	5	8	5	10	2	3	3
201	1	1	0	3	1	4	1	4	3	2	2	1	1	0	3	1	4	1	4	3	2	2	2	3	5	2	1	1	1	1	1	2	2	2	2	2	5	5	5	6	6	2	3	4
202	1	1	0	3	1	4	1	4	3	2	2	1	1	0	3	1	4	1	4	3	2	2	4	3	5	2	1	1	3	1	1	4	5	4	3	2	5	4	5	8	4	2	3	2
203	1	1	0	3	1	4	1	4	3	2	2	1	1	0	3	1	4	1	4	3	2	2	3	3	5	2	1	1	1	1	1	4	2	3	2	2	5	6	6	6	2	1	2	5
204	1	1	0	3	1	4	1	4	3	2	2	1	1	0	3	1	4	1	4	3	2	2	3	4	5	1	97	97	1	1	1	4	1	1	2	1	5	3	3	4	1	1	1	4
205	1	1	0	3	1	4	1	4	3	2	2	1	1	0	3	1	4	1	4	3	2	2	1	2	4	1	1	0	1	1	1	4	2	2	4	2	5	4	4	4	4	1	1	2
206	1	1	0	3	1	4	1	4	3	2	2	1	1	0	3	1	4	1	4	3	2	2	4	4	4	2	1	1	1	1	1	2	5	2	5	1	5	4	1	4	4	3	3	4
207	1	1	0	3	1	4	1	4	3	2	2	1	1	0	3	1	4	1	4	3	2	2	2	1	4	3	97	97	5	1	3	1	5	1	5	3	2	1	1	1	1	2	2	5
208	1	1	0	3	1	4	1	4	3	2	2	1	1	0	3	1	4	1	4	3	2	2	3	3	4	2	1	1	3	1	3	4	2	2	2	1	4	6	6	-8	6	2	1	4
209	1	1	0	3	1	4	1	4	3	2	2	1	1	0	3	1	4	1	4	3	2	2	3	3	4	3	1	2	3	2	1	2	3	4	4	3	4	6	3	8	2	2	3	1
210	1	1	0	3	1	4	1	4	3	2	2	1	1	0	3	1	4	1	4	3	2	2	4	2	4	2	1	1	3	2	2	4	3	4	4	2	5	1	1	1	1	1	2	2
211	1	1	0	3	1	4	1	4	3	2	2	1	1	0	3	1	4	1	4	3	2	2	2	4	4	1	97	97	1	1	1	2	1	2	2	3	-8	5	5	5	4	1	3	2
212	1	1	0	3	1	4	1	4	3	2	2	1	1	0	3	1	4	1	4	3	2	2	3	4	5	2	1	1	1	1	1	2	1	1	1	5	3	5	1	8	2	2	3	1
213	1	1	0	3	1	4	1	4	3	2	2	1	1	0	3	1	4	1	4	3	2	2	4	4	5	1	0	1	1	1	1	1	2	2	2	1	5	5	2	5	2	2	2	-8
214	1	1	0	3	1	4	1	4	3	2	2	1	1	0	3	1	4	1	4	3	2	2	2	4	4	2	1	1	3	2	3	4	3	2	2	1	4	5	3	6	5	2	1	2
215	1	1	0	3	1	4	1	4	3	2	2	1	1	0	3	1	4	1	4	3	2	2	3	3	3	2	1	1	3	1	1	4	5	5	4	2	5	1	3	10	1	3	3	3
216	1	1	0	3	1	4	1	4	3	2	2	1	1	0	3	1	4	1	4	3	2	2	4	4	4	1	1	0	4	1	1	4	4	3	3	1	3	6	3	6	1	3	1	2
217	1	1	0	3	1	4	1	4	3	2	2	1	1	0	3	1	4	1	4	3	2	2	2	4	4	0	0	0	3	1	3	4	2	2	2	2	3	4	3	5	2	1	3	3
218	1	1	0	3	1	4	1	4	3	2	2	1	1	0	3	1	4	1	4	3	2	2	1	4	4	2	1	1	2	2	2	4	4	2	4	1	4	6	2	8	2	2	3	2
219	1	1	0	3	1	4	1	4	3	2	2	1	1	0	3	1	4	1	4	3	2	2	5	1	4	1	0	1	3	1	1	3	1	2	3	3	5	1	2	1	5	1	1	5
220	1	1	0	3	1	4	1	4	3	2	2	1	1	0	3	1	4	1	4	3	2	2	1	4	5	3	2	1	1	1	3	4	4	4	4	2	4	5	5	6	1	2	3	5
221	1	1	0	3	1	4	1	4	3	2	2	1	1	0	3	1	4	1	4	3	2	2	3	4	4	1	97	97	1	1	1	1	2	2	2	1	5	3	3	5	3	3	2	2
222	1	1	0	3	1	4	1	4	3	2	2	1	1	0	3	1	4	1	4	3	2	2	2	2	3	2	1	1	1	1	1	1	4	4	4	2	5	3	1	4	1	1	1	2
223	1	1	0	3	1	4	1	4	3	2	2	1	1	0	3	1	4	1	4	3	2	2	5	1	2	1	0	1	5	1	1	2	5	1	5	5	5	1	5	5	2	2	3	1
224	1	1	0	3	0	4	1	4	3	2	2	1	1	0	3	0	4	1	4	3	2	2	2	4	5	1	1	0	1	1	1	1	2	2	1	4	3	5	4	6	2	2	2	4
225	1	1	0	3	0	4	1	4	3	2	2	1	1	0	3	0	4	1	4	3	2	2	4	5	3	2	1	1	5	1	3	2	4	3	2	1	5	2	1	8	3	3	3	2
226	1	1	0	3	0	4	1	4	3	2	2	1	1	0	3	0	4	1	4	3	2	2	4	4	5	2	1	1	4	1	1	2	5	3	1	1	5	5	3	8	2	1	1	1
227	1	1	0	3	0	4	1	4	3	2	2	1	1	0	3	0	4	1	4	3	2	2	4	2	4	2	97	97	1	1	1	1	4	4	4	4	4	1	9	5	10	2	3	2
228	1	1	0	3	0	4	1	4	3	2	2	1	1	0	3	0	4	1	4	3	2	2	5	1	5	1	97	97	3	3	1	4	1	1	1	1	5	1	1	1	1	2	3	3
229	1	1	0	3	0	4	1	4	3	2	2	1	1	0	3	0	4	1	4	3	2	2	4	3	3	2	1	1	3	1	3	1	3	2	5	4	4	5	4	5	2	2	1	3
230	1	1	0	3	0	4	1	4	3	2	2	1	1	0	3	0	4	1	4	3	2	2	5	3	4	97	97	97	4	1	1	4	2	2	2	2	4	5	5	5	1	1	3	4
231	1	1	0	3	0	4	1	4	3	2	2	1	1	0	3	0	4	1	4	3	2	2	4	4	5	1	1	0	1	1	1	2	2	2	2	3	4	5	5	5	5	2	3	3
232	1	1	0	3	0	4	1	4	3	2	2	1	1	0	3	0	4	1	4	3	2	2	4	4	4	2	1	1	4	4	2	4	3	3	3	3	3	6	6	6	6	1	2	2
233	1	1	0	3	0	4	1	4	3	2	2	1	1	0	3	0	4	1	4	3	2	2	4	4	5	2	1	1	1	1	1	4	4	2	4	4	3	5	4	5	3	1	2	2
234	1	1	0	3	0	4	1	4	3	2	2	1	1	0	3	0	4	1	4	3	2	2	2	1	2	2	1	1	5	3	3	1	4	4	4	3	4	5	6	4	5	3	3	4
235	1	1	0	3	0	4	1	4	3	2	2	1	1	0	3	0	4	1	4	3	2	2	2	3	5	1	97	97	1	1	1	4	2	2	5	1	3	3	3	5	2	1	2	4
[truncated: 10,099 more rows]
